# Supplementary material for: Iron-catalyzed aerobic oxidation of silyl ethers to carboxylic acids
Source: Royal Society of Chemistry journal article supplement (doi:10.1039/d4cc01234h), 2024-01-01

## Iron-catalyzed Aerobic Oxidation of Silyl Ethers to Carboxylic Acids

Zuizhi Lin<sup>a,b</sup> and Shengming Ma<sup>\*,a,c,d</sup>

<sup>a</sup> State Key Laboratory of Organometallic Chemistry, Shanghai Institute of Organic Chemistry, Chinese Academy of Sciences, 345 Lingling Lu, Shanghai 200032, China  
E-mail: [masm@sioc.ac.cn](mailto:masm@sioc.ac.cn)

<sup>b</sup> University of Chinese Academy of Sciences, Beijing 100049, China

<sup>c</sup> Research Center for Molecular Recognition and Synthesis, Department of Chemistry, Fudan University, 220 Handan Lu, Shanghai 200433, China

<sup>d</sup> Laboratory of Molecular Recognition and Synthesis, Department of Chemistry Zhejiang University Hangzhou, Zhejiang 310027, P. R. China.

|                                                                    |          |
|--------------------------------------------------------------------|----------|
| General information                                                | S2       |
| Experimental details and analytical data                           | S3-S26   |
| References                                                         | S27      |
| <sup>1</sup> H NMR and <sup>13</sup> C NMR spectra of the products | S28-S112 |

## General Information

NMR spectra were taken with Agilent, Varian Mercury, Bruker 400 MHz NMR spectrometer (400 MHz for  $^1\text{H}$  NMR; 100 MHz for  $^{13}\text{C}$  NMR) or Bruker 300 MHz NMR spectrometer (300 MHz for  $^1\text{H}$  NMR; 75 MHz for  $^{13}\text{C}$  NMR).  $\text{Fe}(\text{NO}_3)_3 \cdot 9\text{H}_2\text{O}$  and KCl were purchased from Sinopharm Chemical Reagent Co., Ltd. or Shanghai Macklin Biochemical Co., Ltd.; TEMPO was purchased from Anhui Zesheng Technology Co., Ltd.; 4-OH-TEMPO and alcohol **S1** were purchased from Shanghai Adamas Reagent Co., Ltd. or Shanghai Darui Fine Chemical Co., Ltd.; Petroleum ether (b.p. 60-90 °C) and ethyl acetate were purchased from Shanghai Titan Scientific Co. Ltd. Dichloromethane was dried over  $\text{CaH}_2$  and freshly distilled before use; THF was used directly without further treatment. Other reagents were all commercially available and used as received without further purification. All the temperatures were referred to the oil baths used. TBS: *tert*-butyldimethylsilyl; TMS: trimethylsilyl; DMPS: dimethylphenylsilyl; TPS: triphenylsilyl; TBDPS: *tert*-butyldiphenylsilyl; TIPS: triisopropylsilyl.

## Experimental details and analytical data

### 1. Synthesis of silyl ethers

Silyl ethers **1aa**,<sup>1,2</sup> **1ab**,<sup>1,3</sup> **1ac**,<sup>1,3</sup> **1ad**,<sup>1,4</sup> **1ae**,<sup>1,5</sup> **1af**,<sup>1,4</sup> **1ba**,<sup>1,6</sup> **1ca**,<sup>1,7</sup> **1da**,<sup>1,8</sup> **1ea**,<sup>1,9</sup> **1fa**,<sup>1,10</sup> **1ha**,<sup>1,11</sup> **1ia**,<sup>1,7</sup> **1ja**,<sup>1,12</sup> **1ka**,<sup>1,13</sup> **1la**,<sup>1,7</sup> **3aea**,<sup>1,7</sup> **S2**,<sup>1,14</sup> **S3**,<sup>1,7</sup> and **S4**<sup>1,15</sup> were prepared according to the reported procedures.

#### 1.1 2-(Hexyloxy)-1-(*tert*-butyldimethylsilyloxy)ethane **1ga** (lzz-3-064)

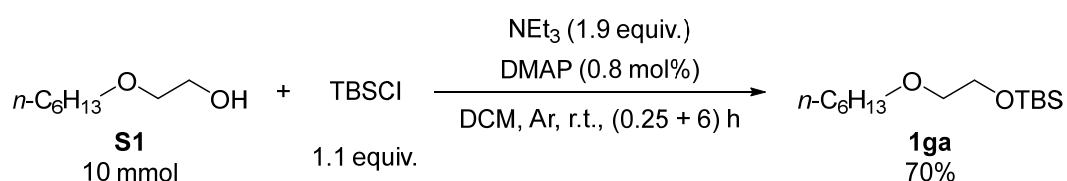

**Typical Procedure I:** A dried Schlenk tube was degassed and refilled with argon for three times. To this Schlenk tube were added TBSCl (1752.3 mg, 11.4 mmol, 98% purity), DMAP (9.5 mg, 0.08 mmol), anhydrous DCM (20 mL), and NEt<sub>3</sub> (2.6 mL, 0.728 g/mL, 1.8928 g, 18.5 mmol, 99% purity) sequentially. The resulting mixture was stirred at room temperature and alcohol **S1** (1484.8 mg, 10 mmol, 98% purity) was added dropwise over 15 min and then stirred for 6 h as monitored by TLC until the complete consumption of **S1**. After removing the solid by filtration, the residue was eluted with DCM (5 mL). The filtrate was washed with a saturated solution of NaHCO<sub>3</sub> (aq., 10 mL) and H<sub>2</sub>O (10 mL) sequentially before drying over anhydrous Na<sub>2</sub>SO<sub>4</sub>. After filtration, the filtrate was concentrated and the residue was purified by column chromatography on silica gel [eluent: petroleum ether (60-90 °C)/ethyl acetate = 50:1 (410 mL)] to afford **1ga** (1845.7 mg, 70%, purity = 98%) as a colorless oil: <sup>1</sup>H NMR (400 MHz, CDCl<sub>3</sub>) δ 3.76 (t, *J* = 5.4 Hz, 2 H, CH<sub>2</sub>), 3.53-3.41 (m, 4 H, 2 × CH<sub>2</sub>), 1.62-1.50 (m, 2 H, CH<sub>2</sub>), 1.39-1.21 (m, 6 H, 3 × CH<sub>2</sub>), 0.95-0.83 (m, 12 H, 4 × CH<sub>3</sub>), 0.07 (s, 6 H, 2 × SiCH<sub>3</sub>); <sup>13</sup>C NMR (100 MHz, CDCl<sub>3</sub>) δ 72.1, 71.5, 62.8, 31.7, 29.7, 25.9, 25.8, 22.6, 18.4, 14.0, -5.3; MS (FI) *m/z* 261 (M+H)<sup>+</sup>, 203 (M-'Bu)<sup>+</sup>; IR (neat): ν = 2954, 2929, 2857, 1465, 1385, 1360, 1294, 1252, 1103 cm<sup>-1</sup>; HRMS (FI) calcd. for C<sub>14</sub>H<sub>33</sub>O<sub>2</sub>Si (M+H)<sup>+</sup>: 261.2244, Found: 261.2241.

1.2 1-(Trimethylsilyloxy)-6-(*tert*-butyldiphenylsilyloxy)hexane **3aeb** (lzz-2-049)

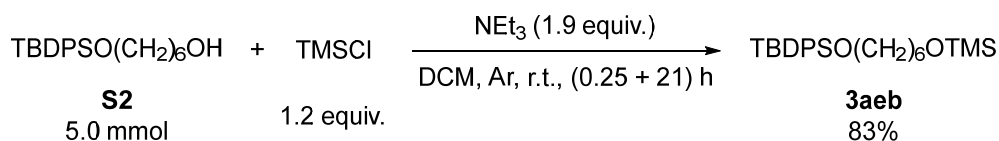

A dried Schlenk tube was degassed and refilled with argon for three times. To this Schlenk tube were added TMSCl (696.4 mg, 6.3 mmol, 98% purity), anhydrous DCM (10 mL), and NEt<sub>3</sub> (1.3 mL, 0.728 g/mL, 0.9464 g, 9.3 mmol) sequentially. The resulting solution was stirred at room temperature and alcohol **S2**<sup>4</sup> (1767.7 mg, 5.0 mmol) was added dropwise over 15 min. The resulting mixture was stirred for 21 h at room temperature, quenched with H<sub>2</sub>O (20 mL), and extracted with DCM (10 mL × 3). The combined organic layer was dried over anhydrous Na<sub>2</sub>SO<sub>4</sub>. After filtration, the filtrate was concentrated and the residue was purified by column chromatography on silica gel [eluent: petroleum ether (60-90 °C, 100 mL) to petroleum ether/ethyl acetate = 40:1 (200 mL) to 20:1 (210 mL)] to afford **3aeb** (1762.6 mg, 83%) as a colorless liquid: <sup>1</sup>H NMR (400 MHz, CDCl<sub>3</sub>) δ 7.71-7.62 (m, 4 H, ArH), 7.45-7.32 (m, 6 H, ArH), 3.65 (t, *J* = 6.6 Hz, 2 H, OCH<sub>2</sub>), 3.55 (t, *J* = 6.8 Hz, 2 H, OCH<sub>2</sub>), 1.62-1.47 (m, 4 H, 2 × CH<sub>2</sub>), 1.42-1.24 (m, 4 H, 2 × CH<sub>2</sub>), 1.04 (s, 9 H, 3 × CH<sub>3</sub>), 0.11 (s, 9 H, 3 × SiCH<sub>3</sub>); <sup>13</sup>C NMR (100 MHz, CDCl<sub>3</sub>) δ 135.5, 134.1, 129.5, 127.5, 63.9, 62.6, 32.7, 32.5, 26.8, 25.61, 25.57, 19.2, -0.5; MS (DART) *m/z* 446 (M+NH<sub>4</sub>)<sup>+</sup>; IR (neat): ν = 3071, 2931, 2900, 2858, 1472, 1427, 1389, 1362, 1250, 1188, 1088, 1009 cm<sup>-1</sup>; HRMS (DART) calcd. for C<sub>25</sub>H<sub>41</sub>O<sub>2</sub>Si<sub>2</sub> (M+H)<sup>+</sup>: 429.2640, Found: 429.2638.

1.3 1-(Dimethylphenylsilyloxy)-6-(*tert*-butyldiphenylsilyloxy)hexane **3aec** (lzz-2-024)

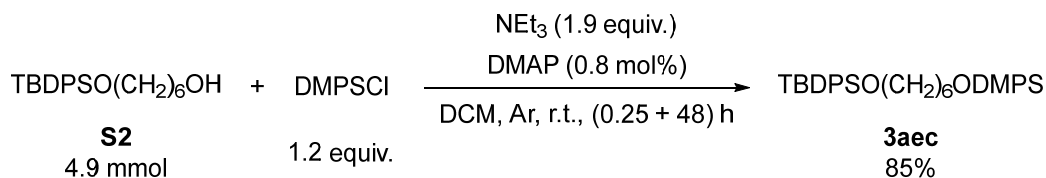

Following **Typical Procedure I**, the reaction of DMPSCl (1036.4 mg, 5.9 mmol, 97% purity), DMAP (5.4 mg, 0.04 mmol), anhydrous DCM (10 mL), NEt<sub>3</sub> (1.3 mL, 0.728 g/mL, 0.9464 g, 9.3 mmol), and alcohol **S2**<sup>4</sup> (1762.4 mg, 4.9 mmol) was stirred

for 48 h and afforded **3aec** (2052.0 mg, 85%) [eluent: petroleum ether (60-90 °C, 100 mL) to petroleum ether/ethyl acetate = 20:1 (210 mL)] as a colorless oil: **<sup>1</sup>H NMR** (400 MHz, CDCl<sub>3</sub>) δ 7.70-7.63 (m, 4 H, ArH), 7.60-7.54 (m, 2 H, ArH), 7.43-7.31 (m, 9 H, ArH), 3.63 (t, *J* = 6.4 Hz, 2 H, OCH<sub>2</sub>), 3.57 (t, *J* = 6.6 Hz, 2 H, OCH<sub>2</sub>), 1.59-1.46 (m, 4 H, 2 × CH<sub>2</sub>), 1.37-1.22 (m, 4 H, 2 × CH<sub>2</sub>), 1.04 (s, 9 H, 3 × CH<sub>3</sub>), 0.37 (s, 6 H, 2 × SiCH<sub>3</sub>); **<sup>13</sup>C NMR** (100 MHz, CDCl<sub>3</sub>) δ 138.0, 135.5, 134.1, 133.4, 129.50, 129.46, 127.8, 127.5, 63.9, 63.0, 32.6, 32.5, 26.8, 25.54, 25.50, 19.2, -1.8; **MS** (DART) *m/z* 508 (M+NH<sub>4</sub>)<sup>+</sup>; **IR** (neat): ν = 3068, 3047, 2933, 2856, 1471, 1427, 1388, 1360, 1303, 1251, 1187, 1109, 1089, 1029 cm<sup>-1</sup>; **HRMS** (DART) calcd. for C<sub>30</sub>H<sub>43</sub>O<sub>2</sub>Si<sub>2</sub> (M+H)<sup>+</sup>: 491.2796, Found: 491.2797.

#### 1.4 1-(*tert*-Butyldiphenylsilyloxy)-6-(triphenylsilyloxy)hexane **3aed** (lzz-2-025)

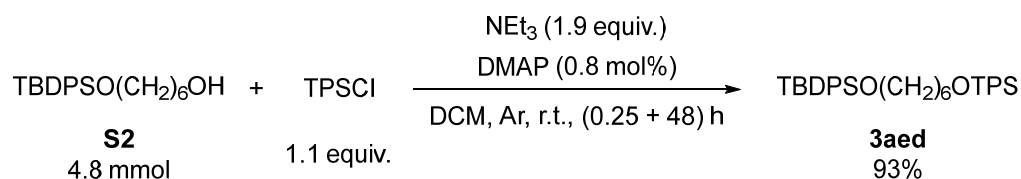

Following **Typical Procedure I**, the reaction of TPSCl (1660.2 mg, 5.5 mmol, 98% purity), DMAP (5.1 mg, 0.04 mmol), anhydrous DCM (10 mL), NEt<sub>3</sub> (1.3 mL, 0.728 g/mL, 0.9464 g, 9.3 mmol), and alcohol **S2**<sup>4</sup> (1725.7 mg, 4.8 mmol) was stirred for 48 h and afforded **3aed** (3119.0 mg, 93%, purity 93%) [eluent: petroleum ether (60-90 °C, 200 mL) to petroleum ether/ethyl acetate = 20:1 (310 mL)] as a white solid: **m.p.** 75.6-76.6 °C (ether); **<sup>1</sup>H NMR** (400 MHz, CDCl<sub>3</sub>) δ 7.68-7.59 (m, 10 H, ArH), 7.44-7.33 (m, 15 H, ArH), 3.77 (t, *J* = 6.4 Hz, 2 H, OCH<sub>2</sub>), 3.61 (t, *J* = 6.4 Hz, 2 H, OCH<sub>2</sub>), 1.61-1.47 (m, 4 H, 2 × CH<sub>2</sub>), 1.34-1.26 (m, 4 H, 2 × CH<sub>2</sub>), 1.06-1.00 (s, 9 H, 3 × CH<sub>3</sub>); **<sup>13</sup>C NMR** (100 MHz, CDCl<sub>3</sub>) δ 135.5, 135.4, 134.4, 134.1, 129.9, 129.5, 127.8, 127.5, 63.87, 63.85, 32.5, 26.8, 25.5, 19.2; **MS** (DART) *m/z* 632 (M+NH<sub>4</sub>)<sup>+</sup>; **IR** (neat): ν = 3067, 3046, 2934, 2855, 1464, 1427, 1358, 1305, 1113, 1079, 1023 cm<sup>-1</sup>; **Anal.** calcd. for C<sub>40</sub>H<sub>46</sub>O<sub>2</sub>Si<sub>2</sub>: C 78.12, H 7.54, Found: C 77.81, H 7.47.

1.5 1-(Triisopropylsilyloxy)-6-(dimethylphenylsilyloxy)hexane **3afc** (lzz-2-016)

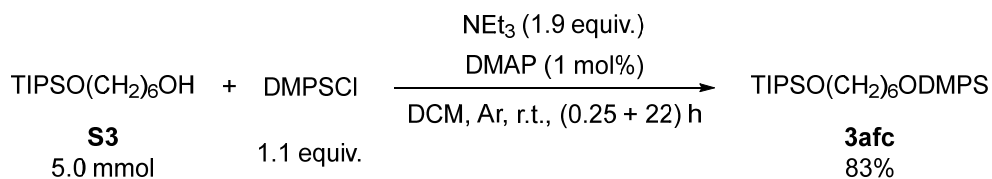

Following **Typical Procedure I**, the reaction of DMPSCl (967.6 mg, 5.5 mmol, 97% purity), DMAP (6.1 mg, 0.05 mmol), anhydrous DCM (10 mL), NEt<sub>3</sub> (1.3 mL, 0.728 g/mL, 0.9464 g, 9.3 mmol), and alcohol **S3**<sup>4</sup> (1374.1 mg, 5.0 mmol) was stirred for 22 h and afforded **3afc** (1708.6 mg, 83%) [eluent: petroleum ether (60-90 °C, 100 mL) to petroleum ether/ethyl acetate = 20:1 (300 mL)] as a colorless oil: <sup>1</sup>H NMR (400 MHz, CDCl<sub>3</sub>) δ 7.61-7.54 (m, 2 H, ArH), 7.42-7.34 (m, 3 H, ArH), 3.68-3.53 (m, 4 H, 2 × OCH<sub>2</sub>), 1.58-1.47 (m, 4 H, 2 × CH<sub>2</sub>), 1.36-1.28 (m, 4 H, 2 × CH<sub>2</sub>), 1.10-1.00 (m, 21 H, 3 × SiCH and 6 × CH<sub>3</sub>), 0.37 (s, 6 H, 2 × SiCH<sub>3</sub>); <sup>13</sup>C NMR (100 MHz, CDCl<sub>3</sub>) δ 138.0, 133.4, 129.5, 127.8, 63.4, 63.1, 33.0, 32.6, 25.6, 18.0, 12.0, -1.8; MS (DART) *m/z* 426 (M+NH<sub>4</sub>)<sup>+</sup>; IR (neat): ν = 2938, 2864, 1463, 1428, 1385, 1251, 1091, 1013 cm<sup>-1</sup>; HRMS (DART) calcd. for C<sub>23</sub>H<sub>45</sub>O<sub>2</sub>Si<sub>2</sub> (M+H)<sup>+</sup>: 409.2953, Found: 409.2951.

1.6 1-(Triisopropylsilyloxy)-5-(dimethylphenylsilyloxy)pentane **3bfc** (lzz-2-019)

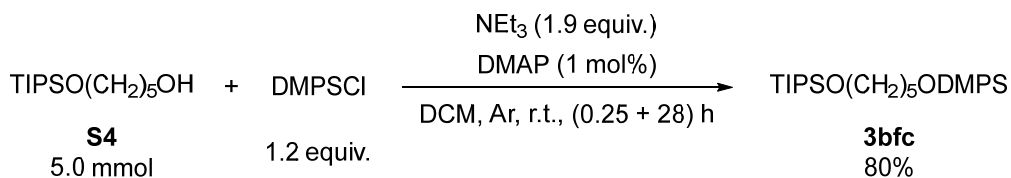

Following **Typical Procedure I**, the reaction of DMPSCl (1030.2 mg, 5.9 mmol, 97% purity), DMAP (5.7 mg, 0.05 mmol), anhydrous DCM (10 mL), NEt<sub>3</sub> (1.3 mL, 0.728 g/mL, 0.9464 g, 9.3 mmol), and alcohol **S4**<sup>6</sup> (1306.2 mg, 5.0 mmol) was stirred for 28 h and afforded **3bfc** (1582.3 mg, 80%) [eluent: petroleum ether (60-90 °C, 200 mL) to petroleum ether/ethyl acetate = 40:1 (200 mL) to 20:1 (210 mL)] as a colorless oil: <sup>1</sup>H NMR (400 MHz, CDCl<sub>3</sub>) δ 7.60-7.54 (m, 2 H, ArH), 7.42-7.34 (m, 3 H, ArH), 3.65 (t, *J* = 6.4 Hz, 2 H, OCH<sub>2</sub>), 3.59 (t, *J* = 6.6 Hz, 2 H, OCH<sub>2</sub>), 1.60-1.48 (m, 4 H, 2 × CH<sub>2</sub>), 1.42-1.32 (m, 2 H, CH<sub>2</sub>), 1.13-1.00 (m, 21 H, 3 × SiCH and 6 × CH<sub>3</sub>), 0.37 (s, 6 H, 2 × SiCH<sub>3</sub>); <sup>13</sup>C NMR (100 MHz, CDCl<sub>3</sub>) δ 138.0, 133.4, 129.5, 127.8, 63.3, 63.1,

32.7, 32.4, 22.1, 18.0, 12.0, -1.8; **MS** (DART)  $m/z$  395 (M+H)<sup>+</sup>; **IR** (neat):  $\nu$  = 3048, 2940, 2863, 1463, 1428, 1386, 1251, 1091 cm<sup>-1</sup>; **HRMS** (DART) calcd. for C<sub>22</sub>H<sub>43</sub>O<sub>2</sub>Si<sub>2</sub> (M+H)<sup>+</sup>: 395.2796, Found: 395.2796.

## 2. Deprotective oxidation of silyl ethers to carboxylic acids with pure oxygen

### 2.1 Preparation of octanoic acid **2a**

#### 2.1.1 From **1aa** with TEMPO as co-catalyst (lzz-2-113)

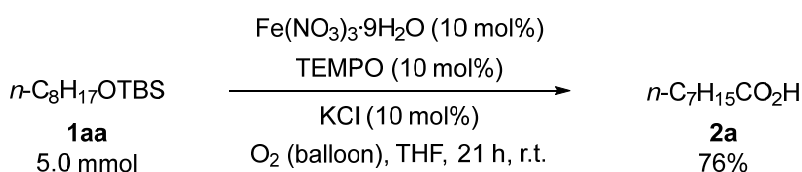

**Typical Procedure II:** To a Schlenk tube were added KCl (37.9 mg, 0.5 mmol), Fe(NO<sub>3</sub>)<sub>3</sub>•9H<sub>2</sub>O (205.8 mg, 0.5 mmol), TEMPO (79.2 mg, 0.5 mmol), **1aa** (1215.0 mg, 5.0 mmol), and THF (1085.6 mg, 14.9 mmol) sequentially. The atmosphere was replaced with using a water pump (until bubbles appeared in the mixture) for three times. The resulting mixture was stirred at room temperature for 21 h as monitored by TLC. After filtration through a short column of silica gel eluted with DCM/methanol = 10:1 (150 mL) and concentration, the residue was purified by column chromatography on silica gel [eluent: petroleum ether (60-90 °C)/ethyl acetate = 10:1 (220 mL) to 5:1 (480 mL)] to afford a crude product. To this crude product were added DCM (10 mL) and a saturated solution of NaHCO<sub>3</sub> (aq., 5 mL). After separation, the aqueous layer was treated with an aqueous solution of HCl (3 mol/L) for adjusting its pH to 1-2 and extracted with DCM (10 mL × 5). The combined organic layer was dried over anhydrous Na<sub>2</sub>SO<sub>4</sub>. After removing the solid by filtration, the filtrate was evaporated to afford **2a**<sup>16</sup> (545.3 mg, 76%) as a pale yellow liquid: <sup>1</sup>H NMR (400 MHz, CDCl<sub>3</sub>)  $\delta$  10.71 (br, 1 H, CO<sub>2</sub>H), 2.34 (t,  $J$  = 7.4 Hz, 2 H, CH<sub>2</sub>), 1.68-1.58 (m, 2 H, CH<sub>2</sub>), 1.39-1.23 (m, 8 H, 4 × CH<sub>2</sub>), 0.92-0.84 (m, 3 H, CH<sub>3</sub>); <sup>13</sup>C NMR (100 MHz, CDCl<sub>3</sub>)  $\delta$  180.4, 34.1, 31.6, 29.0, 28.9, 24.7, 22.6, 14.0.

### 2.1.2 From **1aa** with 4-OH-TEMPO as co-catalyst (lzz-2-115)

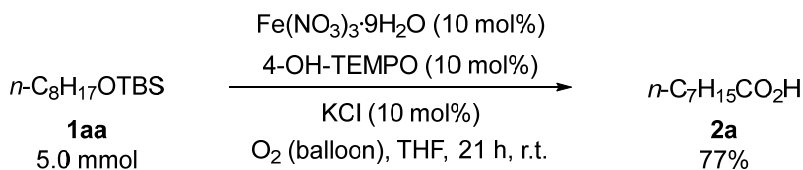

Following **Typical Procedure II**, the reaction of **1aa** (1226.0 mg, 5.0 mmol), KCl (37.3 mg, 0.5 mmol), Fe(NO<sub>3</sub>)<sub>3</sub>•9H<sub>2</sub>O (207.1 mg, 0.5 mmol), and 4-OH-TEMPO (87.8 mg, 0.1 mmol) in THF (1086.2 mg, 14.9 mmol) was stirred at room temperature for 21 h to afford **2a** (557.4 mg, 77%) as a pale yellow liquid.

### 2.1.3 From **1ab** with 4-OH-TEMPO as co-catalyst (lzz-1-47)

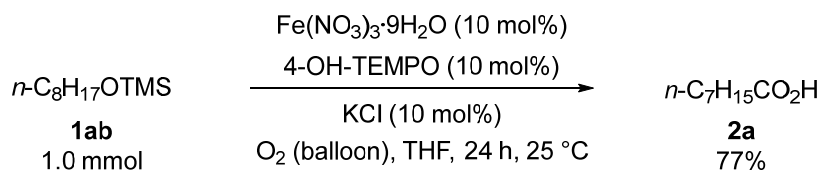

**Typical Procedure III:** To a Schlenk tube were added KCl (7.8 mg, 0.1 mmol), Fe(NO<sub>3</sub>)<sub>3</sub>•9H<sub>2</sub>O (42.0 mg, 0.1 mmol), 4-OH-TEMPO (16.6 mg, 0.1 mmol), **1ab** (218.4 mg, 1.0 mmol), and THF (1.0 mL) sequentially. The atmosphere was reduced using a water pump (until bubbles appeared in the mixture) and refilled with pure oxygen for three times. The resulting mixture was stirred at 25 °C for 24 h as monitored by TLC. After removing the solid by filtration through a short column of silica gel eluted with DCM/methanol = 10:1 (150 mL) and concentration, the residue was diluted with DCM (10 mL) and basified with a saturated solution of NaHCO<sub>3</sub> (aq., 10 mL). The aqueous layer was acidified with an aqueous solution of HCl (3 mol/L) and extracted with DCM (10 mL × 5). The combined organic layer was dried over anhydrous Na<sub>2</sub>SO<sub>4</sub>. After removing the solid by filtration, the filtrate was evaporated to afford **2a** (117.6 mg, 77%) as a pale yellow liquid.

### 2.1.4 From **1ac** with 4-OH-TEMPO as co-catalyst (lzz-1-41)

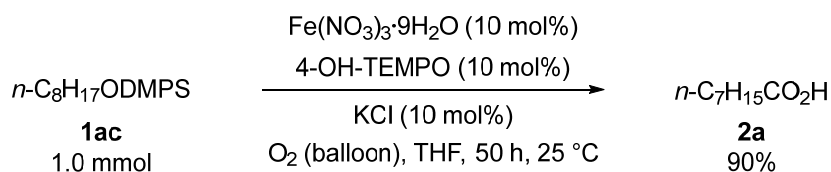



Following **Typical Procedure III**, the reaction of **1ac** (259.9 mg, 1.0 mmol), KCl (7.3 mg, 0.1 mmol), Fe(NO<sub>3</sub>)<sub>3</sub>•9H<sub>2</sub>O (40.8 mg, 0.1 mmol), and 4-OH-TEMPO (18.1 mg, 0.1 mmol) in THF (1.0 mL) was stirred at 25 °C for 50 h to afford **2a** (127.0 mg, 90%) as a pale yellow liquid.

#### 2.1.5 From **1ad** with 4-OH-TEMPO as co-catalyst (lzz-1-49)

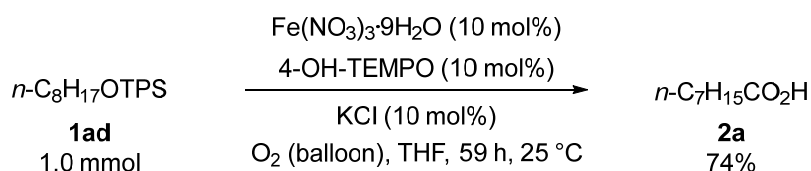

Following **Typical Procedure III**, the reaction of **1ad** (374.8 mg, 1.0 mmol), KCl (7.7 mg, 0.1 mmol), Fe(NO<sub>3</sub>)<sub>3</sub>•9H<sub>2</sub>O (41.2 mg, 0.1 mmol), and 4-OH-TEMPO (17.1 mg, 0.1 mmol) in THF (1.0 mL) was stirred at 25 °C for 59 h to afford **2a** (102.9 mg, 74%) as a pale yellow liquid.

#### 2.2 Preparation of pentadecanoic acid **2b** (lzz-2-084)

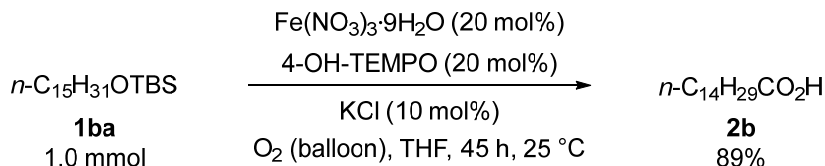

**Typical Procedure IV:** To a Schlenk tube were added KCl (8.0 mg, 0.1 mmol), Fe(NO<sub>3</sub>)<sub>3</sub>•9H<sub>2</sub>O (81.8 mg, 0.2 mmol), 4-OH-TEMPO (35.4 mg, 0.2 mmol), **1ba** (340.6 mg, 1.0 mmol), and THF (1.0 mL) sequentially. The atmosphere was replaced with pure oxygen for three times using a water pump (until bubbles appeared in the mixture). The resulting mixture was stirred at 25 °C for 45 h as monitored by TLC. After removing the solid by filtration through a short column of silica gel eluted with DCM/methanol = 10:1 (150 mL) and concentration, the residue was purified by column chromatography on silica gel [eluent: petroleum ether (60-90 °C)/ethyl acetate = 50:1 (200 mL) to 30:1 (180 mL) to 10:1 (220 mL) to 5:1 (180 mL)] to afford **2b**<sup>17</sup> (213.4 mg, 89%) as a pale yellow solid: **m.p.** 52.2-52.9 °C (*n*-hexane) (reported:<sup>8</sup> 51-53 °C); **<sup>1</sup>H NMR** (400 MHz, CDCl<sub>3</sub>) δ 2.35 (t, *J* = 7.4 Hz, 2 H, CH<sub>2</sub>), 1.69-1.58 (m, 2 H, CH<sub>2</sub>), 1.38-1.18 (m, 22 H, 11 × CH<sub>2</sub>), 0.93-0.83 (m, 3 H, CH<sub>3</sub>); **<sup>13</sup>C NMR** (100 MHz, CDCl<sub>3</sub>)

$\delta$  180.6, 34.1, 31.9, 29.70, 29.68, 29.66, 29.60, 29.44, 29.37, 29.2, 29.1, 24.7, 22.7, 14.1; **MS** (ESI, Negative)  $m/z$  241 (M-H)<sup>-</sup>; **IR** (neat):  $\nu$  = 3400-2600, 1693, 1469, 1429, 1411, 1316, 1297, 1276, 1253, 1229, 1206, 1186 cm<sup>-1</sup>.

### 2.3 Preparation of 3-phenylpropanoic acid **2c** (lzz-4-011)

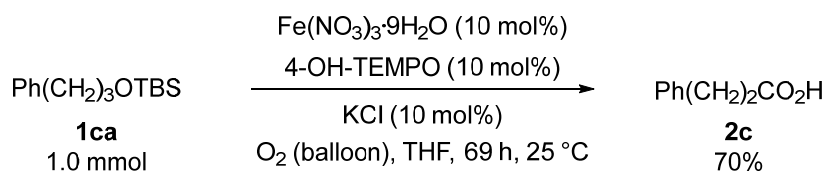

Following **Typical Procedure II**, the reaction of **1ca** (249.0 mg, 1.0 mmol), KCl (7.9 mg, 0.1 mmol), Fe(NO<sub>3</sub>)<sub>3</sub>•9H<sub>2</sub>O (41.3 mg, 0.1 mmol), and 4-OH-TEMPO (17.4 mg, 0.1 mmol) in THF (1.0 mL) was stirred at 25 °C for 69 h to afford **2c**<sup>16</sup> (106.1 mg, 70%) [eluent: petroleum ether (60-90 °C)/ethyl acetate = 5:1 (360 mL) to 2:1 (300 mL)] as a white solid: **<sup>1</sup>H NMR** (400 MHz, CDCl<sub>3</sub>)  $\delta$  7.33-7.26 (m, 2 H, ArH), 7.24-7.18 (m, 3 H, ArH), 2.96 (t,  $J$  = 7.8 Hz, 2 H, CH<sub>2</sub>), 2.69 (t,  $J$  = 7.8 Hz, 2 H, CH<sub>2</sub>); **<sup>13</sup>C NMR** (100 MHz, CDCl<sub>3</sub>)  $\delta$  179.6, 140.1, 128.5, 128.2, 126.3, 35.6, 30.5.

### 2.4 Preparation of 6-chlorohexanoic acid **2d** (lzz-1-68)

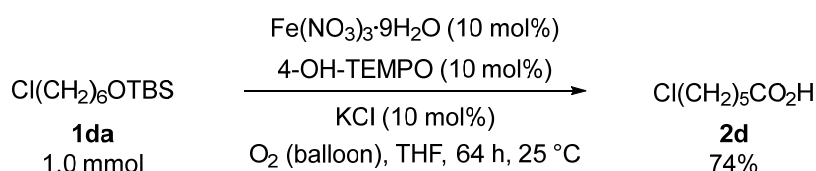

Following **Typical Procedure III**, the reaction of **1da** (265.2 mg, 1.0 mmol), KCl (7.0 mg, 0.1 mmol), Fe(NO<sub>3</sub>)<sub>3</sub>•9H<sub>2</sub>O (41.5 mg, 0.1 mmol), and 4-OH-TEMPO (17.8 mg, 0.1 mmol) in THF (1.0 mL) was stirred at 25 °C for 64 h to afford **2d**<sup>18</sup> (118.4 mg, 74%) as a pale yellow liquid: **<sup>1</sup>H NMR** (300 MHz, CDCl<sub>3</sub>)  $\delta$  10.48 (br, 1 H, CO<sub>2</sub>H), 3.54 (t,  $J$  = 6.6 Hz, 2 H, CH<sub>2</sub>), 2.39 (t,  $J$  = 7.4 Hz, 2 H, CH<sub>2</sub>), 1.86-1.74 (m, 2 H, CH<sub>2</sub>), 1.74-1.61 (m, 2 H, CH<sub>2</sub>), 1.57-1.42 (m, 2 H, CH<sub>2</sub>); **<sup>13</sup>C NMR** (75 MHz, CDCl<sub>3</sub>)  $\delta$  179.9, 44.7, 33.8, 32.2, 26.3, 23.9; **MS** (ESI, Negative)  $m/z$  151 [M(<sup>37</sup>Cl)-H]<sup>-</sup>, 149 [M(<sup>35</sup>Cl)-H]<sup>-</sup>; **IR** (neat):  $\nu$  = 3400-2500, 1704, 1413, 1277, 1218, 1130 cm<sup>-1</sup>.

## 2.5 Preparation of 9-bromononanoic acid **2e** (lzz-6-061)

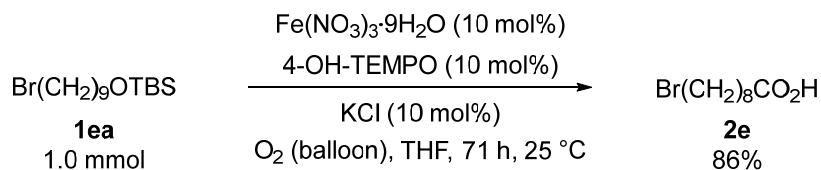

Following **Typical Procedure IV**, the reaction of **1ea** (333.3 mg, 1.0 mmol), KCl (8.0 mg, 0.1 mmol), Fe(NO<sub>3</sub>)<sub>3</sub>•9H<sub>2</sub>O (41.5 mg, 0.1 mmol), and 4-OH-TEMPO (17.5 mg, 0.1 mmol) in THF (1.0 mL) was stirred at 25 °C for 71 h to afford **2e**<sup>16</sup> (202.6 mg, 86%) [eluent: petroleum ether (60-90 °C)/ethyl acetate = 5:1 (240 mL) to 2:1 (600 mL)] as a yellow solid: <sup>1</sup>H NMR (400 MHz, CDCl<sub>3</sub>) δ 3.41 (t, *J* = 6.8 Hz, 2 H, CH<sub>2</sub>), 2.36 (t, *J* = 7.6 Hz, 2 H, CH<sub>2</sub>), 1.90-1.80 (m, 2 H, CH<sub>2</sub>), 1.69-1.58 (m, 2 H, CH<sub>2</sub>), 1.48-1.28 (m, 8 H, 4 × CH<sub>2</sub>); <sup>13</sup>C NMR (100 MHz, CDCl<sub>3</sub>) δ 180.5, 33.9, 33.8, 32.6, 28.9, 28.7, 28.4, 27.9, 24.4.

## 2.6 Preparation of 3-benzyloxypropionic acid **2f** (lzz-2-061)

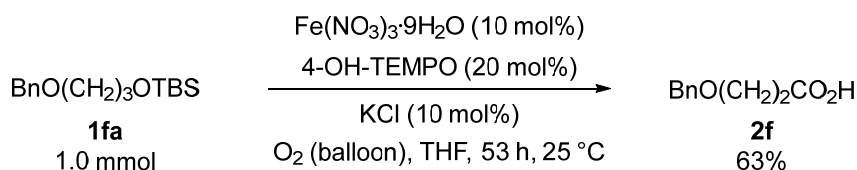

Following **Typical Procedure II**, the reaction of **1fa** (279.0 mg, 1.0 mmol), KCl (7.5 mg, 0.1 mmol), Fe(NO<sub>3</sub>)<sub>3</sub>•9H<sub>2</sub>O (40.9 mg, 0.1 mmol), and 4-OH-TEMPO (35.6 mg, 0.2 mmol) in THF (1.0 mL) was stirred at 25 °C for 53 h to afford **2f**<sup>19</sup> (113.6 mg, 63%) [eluent: petroleum ether (60-90 °C)/ethyl acetate = 1:1 (220 mL) to 5:1 (240 mL) to 2:1 (210 mL) to 1:1 (200 mL)] as a pale yellow oil: <sup>1</sup>H NMR (400 MHz, CDCl<sub>3</sub>) δ 10.75 (br, 1 H, CO<sub>2</sub>H), 7.36-7.23 (m, 5 H, ArH), 4.53 (s, 2 H, CH<sub>2</sub>), 3.73 (t, *J* = 6.2 Hz, 2 H, CH<sub>2</sub>), 2.64 (t, *J* = 6.2 Hz, 2 H, CH<sub>2</sub>); <sup>13</sup>C NMR (100 MHz, CDCl<sub>3</sub>) δ 177.6, 137.7, 128.3, 127.65, 127.63, 73.0, 65.1, 34.8; MS (EI) *m/z* (%) 180 (M<sup>+</sup>, 6.52), 107 (100); IR (neat): ν = 3400-2400, 1709, 1495, 1452, 1423, 1363, 1236, 1188, 1100, 1067, 1028 cm<sup>-1</sup>.

## 2.7 Preparation of 2-(hexyloxy)acetic acid **2g** (lzz-6-055)

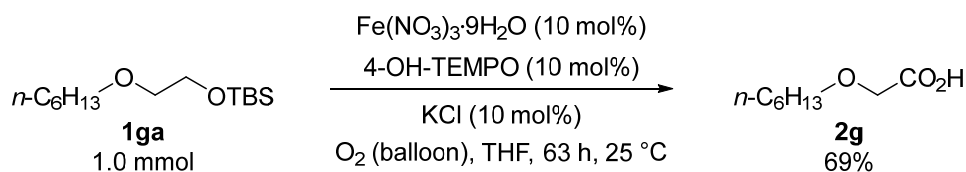

Following **Typical Procedure II**, the reaction of **1ga** (262.0 mg, 1.0 mmol), KCl (8.0 mg, 0.1 mmol), Fe(NO<sub>3</sub>)<sub>3</sub>•9H<sub>2</sub>O (41.7 mg, 0.1 mmol), and 4-OH-TEMPO (17.7 mg, 0.1 mmol) in THF (1.0 mL) was stirred at 25 °C for 63 h to afford **2g**<sup>16</sup> (109.9 mg, 69%) as a pale yellow oil: **<sup>1</sup>H NMR** (400 MHz, CDCl<sub>3</sub>) δ 10.88 (br, 1 H, CO<sub>2</sub>H), 4.12 (s, 2 H, CH<sub>2</sub>), 3.55 (t, *J* = 6.8 Hz, 2 H, CH<sub>2</sub>), 1.69-1.55 (m, 2 H, CH<sub>2</sub>), 1.41-1.22 (m, 6 H, 3 × CH<sub>2</sub>), 0.95-0.82 (m, 3 H, CH<sub>3</sub>); **<sup>13</sup>C NMR** (100 MHz, CDCl<sub>3</sub>) δ 175.7, 72.1, 67.7, 31.5, 29.3, 25.5, 22.5, 13.9.

## 2.8 Preparation of 2-(tosyloxy)acetic acid **2h** (lzz-6-056)

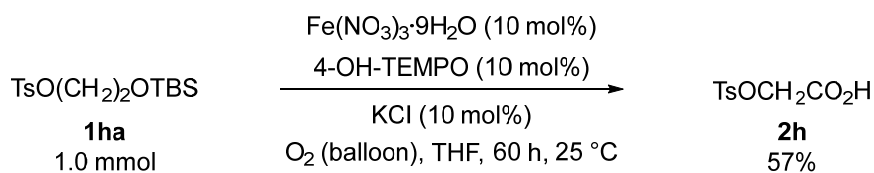

Following **Typical Procedure II**, the reaction of **1ha** (330.5 mg, 1.0 mmol), KCl (7.4 mg, 0.1 mmol), Fe(NO<sub>3</sub>)<sub>3</sub>•9H<sub>2</sub>O (40.5 mg, 0.1 mmol), and 4-OH-TEMPO (17.4 mg, 0.1 mmol) in THF (1.0 mL) was stirred at 25 °C for 60 h to afford **2h**<sup>20</sup> (135.3 mg, 57%, purity = 97%) [eluent: dichloromethane (200 mL) to dichloromethane/methanol = 50:1 (400 mL)] as a white solid: **m.p.** 133.4-134.4 °C (EA/*n*-hexane) (reported:<sup>11</sup> 136-138 °C); **<sup>1</sup>H NMR** (400 MHz, CD<sub>3</sub>OD) δ 7.81 (d, *J* = 8.4 Hz, 2 H, ArH), 7.43 (d, *J* = 8.0 Hz, 2 H, ArH), 4.59 (s, 2 H, CH<sub>2</sub>), 2.44 (s, 3 H, CH<sub>3</sub>); **<sup>13</sup>C NMR** (100 MHz, CD<sub>3</sub>OD) δ 169.4, 146.8, 133.9, 131.0, 129.0, 65.9, 21.6; **MS** (ESI) *m/z* 253 (M+Na)<sup>+</sup>; **IR** (neat): *v* = 3300-2500, 1710, 1596, 1495, 1442, 1413, 1357, 1293, 1253, 1170, 1096, 1053, 1034 cm<sup>-1</sup>.

## 2.9 Preparation of 1,6-hexanedioic acid monomethyl ester **2i** (lzz-6-060)

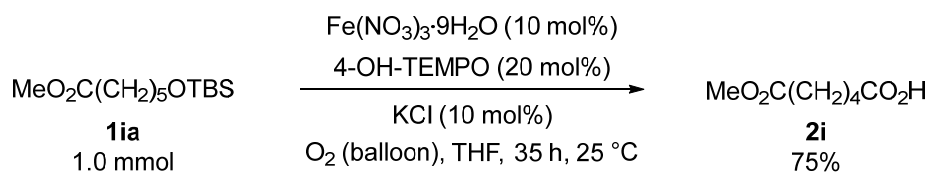

Following **Typical Procedure II**, the reaction of **1ia** (260.9 mg, 1.0 mmol), KCl (7.9 mg, 0.1 mmol), Fe(NO<sub>3</sub>)<sub>3</sub>•9H<sub>2</sub>O (41.6 mg, 0.1 mmol), and 4-OH-TEMPO (35.5 mg, 0.2 mmol) in THF (1.0 mL) was stirred at 25 °C for 35 h to afford **2i**<sup>16</sup> (119.6 mg, 75%) [eluent: petroleum ether (60-90 °C)/ethyl acetate = 5:1 (240 mL) to 2:1 (600 mL)] as a colorless oil: <sup>1</sup>H NMR (400 MHz, CDCl<sub>3</sub>) δ 3.68 (s, 3 H, CH<sub>3</sub>), 2.43-2.30 (m, 4 H, 2 × CH<sub>2</sub>), 1.74-1.62 (m, 4 H, 2 × CH<sub>2</sub>); <sup>13</sup>C NMR (100 MHz, CDCl<sub>3</sub>) δ 179.4, 173.8, 51.5, 33.5, 24.1, 23.9.

## 2.10 Preparation of 3-(trimethylsilyl)propionic acid **2j** (lzz-2-064)

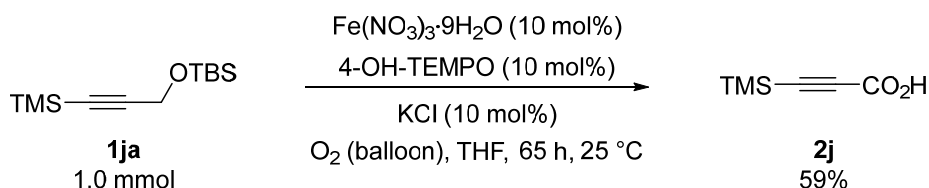

Following **Typical Procedure IV**, the reaction of **1ja** (235.6 mg, 1.0 mmol), KCl (7.9 mg, 0.1 mmol), Fe(NO<sub>3</sub>)<sub>3</sub>•9H<sub>2</sub>O (41.9 mg, 0.1 mmol), and 4-OH-TEMPO (17.7 mg, 0.1 mmol) in THF (1.0 mL) was stirred at 25 °C for 65 h to afford **2j**<sup>16</sup> (81.5 mg, 59%) [eluent: petroleum ether (60-90 °C)/ethyl acetate = 5:1 (240 mL) to dichloromethane/methanol = 10:1 (110 mL)] as a pale yellow oil: <sup>1</sup>H NMR (400 MHz, CDCl<sub>3</sub>) δ 8.92 (br, 1 H, CO<sub>2</sub>H), 0.26 (s, 9 H, 3 × SiCH<sub>3</sub>); <sup>13</sup>C NMR (100 MHz, CDCl<sub>3</sub>) δ 157.0, 96.7, 94.0, -1.0.

## 2.11 Preparation of 2-thienylacetic acid **2k** (lzz-2-075)

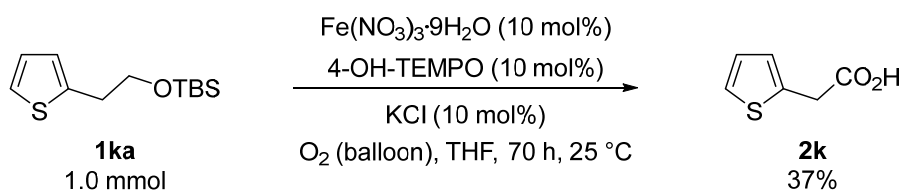

Following **Typical Procedure II**, the reaction of **1ka** (237.1 mg, 1.0 mmol), KCl

(7.8 mg, 0.1 mmol), Fe(NO<sub>3</sub>)<sub>3</sub>•9H<sub>2</sub>O (41.2 mg, 0.1 mmol), and 4-OH-TEMPO (17.5 mg, 0.1 mmol) in THF (1.0 mL) was stirred at 25 °C for 70 h to afford **2k**<sup>16</sup> (51.0 mg, 37%) [eluent: petroleum ether (60-90 °C)/ethyl acetate = 5:1 (240 mL) to 2:1 (210 mL) to 1:1 (200 mL)] as a yellow solid: <sup>1</sup>H NMR (400 MHz, CDCl<sub>3</sub>) δ 11.19 (br, 1 H, CO<sub>2</sub>H), 7.26-7.21 (m, 1 H, ArH), 7.00-6.93 (m, 2 H, ArH), 3.88 (s, 2 H, CH<sub>2</sub>); <sup>13</sup>C NMR (100 MHz, CDCl<sub>3</sub>) δ 177.0, 134.0, 127.2, 126.9, 125.3, 35.0.

### 2.12 Preparation of 4-nitrobenzoic acid **2l** (lzz-2-103)

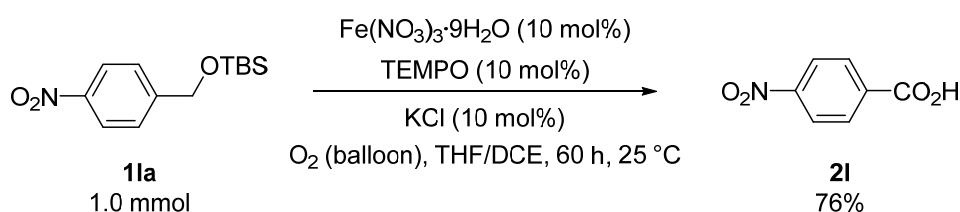

Following **Typical Procedure III**, the reaction of **1la** (262.2 mg, 1.0 mmol), KCl (8.0 mg, 0.1 mmol), Fe(NO<sub>3</sub>)<sub>3</sub>•9H<sub>2</sub>O (40.7 mg, 0.1 mmol), TEMPO (15.8 mg, 0.1 mmol), THF (0.5 mL), and DCE (0.5 mL) was stirred at 25 °C for 60 h to afford **2l**<sup>16</sup> (127.8 mg, 76%, purity = 97%) as a white solid: <sup>1</sup>H NMR (400 MHz, DMSO-*d*<sub>6</sub>) δ 13.63 (br, 1 H, CO<sub>2</sub>H), 8.32 (d, *J* = 9.2 Hz, 2 H, ArH), 8.17 (d, *J* = 9.2 Hz, 2 H, ArH); <sup>13</sup>C NMR (100 MHz, DMSO-*d*<sub>6</sub>) δ 165.8, 150.0, 136.4, 130.7, 123.7.

### 2.13 The reaction of **1ae** (lzz-1-48)

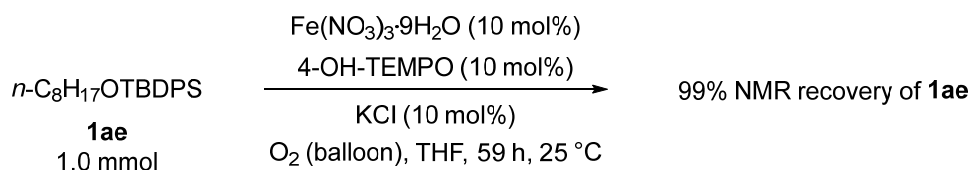

Following **Typical Procedure IV**, the reaction of **1ae** (362.5 mg, 1.0 mmol), KCl (7.7 mg, 0.1 mmol), Fe(NO<sub>3</sub>)<sub>3</sub>•9H<sub>2</sub>O (40.5 mg, 0.1 mmol), and 4-OH-TEMPO (17.5 mg, 0.1 mmol) in THF (1.0 mL) was stirred at 25 °C for 59 h and failed to afford **2a** with 99% of **1ae** being recovered as determined by the <sup>1</sup>H NMR analysis with CH<sub>2</sub>Br<sub>2</sub> as the internal standard.

## 2.14 The reaction of **1af** (lzz-3-128)

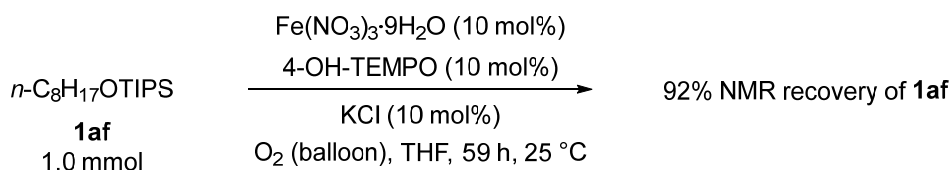

Following **Typical Procedure IV**, the reaction of **1af** (287.9 mg, 1.0 mmol), KCl (7.7 mg, 0.1 mmol), Fe(NO<sub>3</sub>)<sub>3</sub>•9H<sub>2</sub>O (41.2 mg, 0.1 mmol), and 4-OH-TEMPO (17.8 mg, 0.1 mmol) in THF (1.0 mL) was stirred at 25 °C for 59 h and failed to afford **2a** with 92% of **1af** being recovered as determined by the <sup>1</sup>H NMR analysis with CH<sub>2</sub>Br<sub>2</sub> as the internal standard.

## 3. Selective deprotective oxidation of silyl ethers to carboxylic acids

### 3.1 Preparation of 6-((1,1-dimethylethyl)diphenylsilyloxy)hexanoic acid **4ae**

#### 3.1.1 From **3aea** (lzz-1-64)

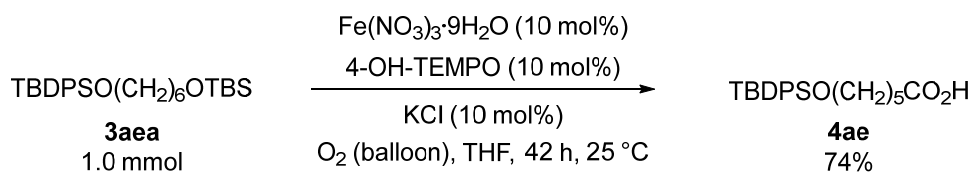

Following **Typical Procedure IV**, the reaction of **3aea** (441.4 mg, 1.0 mmol), KCl (7.3 mg, 0.1 mmol), Fe(NO<sub>3</sub>)<sub>3</sub>•9H<sub>2</sub>O (42.8 mg, 0.1 mmol), and 4-OH-TEMPO (17.1 mg, 0.1 mmol) in THF (1.0 mL) was stirred at 25 °C for 42 h to afford **4ae**<sup>21</sup> (255.5 mg, 74%) [eluent: petroleum ether (60-90 °C)/ethyl acetate = 10:1 (900 mL)] as a pale yellow oil: <sup>1</sup>H NMR (300 MHz, CDCl<sub>3</sub>) δ 7.70-7.61 (m, 4 H, ArH), 7.45-7.32 (m, 6 H, ArH), 3.70-3.61 (m, 2 H, CH<sub>2</sub>), 2.33 (t, *J* = 7.5 Hz, 2 H, CH<sub>2</sub>), 1.68-1.50 (m, 4 H, 2 × CH<sub>2</sub>), 1.48-1.34 (m, 2 H, CH<sub>2</sub>), 1.04 (s, 9 H, 3 × CH<sub>3</sub>); <sup>13</sup>C NMR (75 MHz, CDCl<sub>3</sub>) δ 179.6, 135.6, 134.1, 129.5, 127.6, 63.6, 33.9, 32.1, 26.8, 25.3, 24.4, 19.2; MS (ESI) *m/z* 393 (M+Na)<sup>+</sup>; IR (neat): ν = 3500-2400, 1709, 1588, 1472, 1462, 1428, 1390, 1284, 1237, 1111 cm<sup>-1</sup>.

### 3.1.2 From **3aeb** (lzz-2-055)

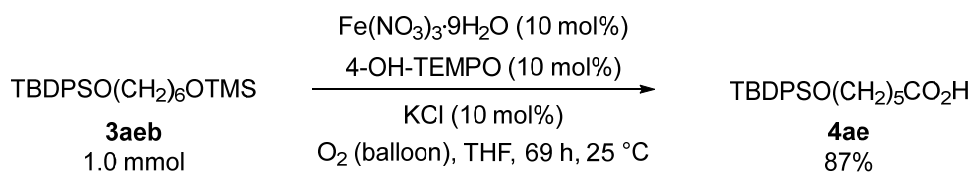

Following **Typical Procedure IV**, the reaction of **3aeb** (421.5 mg, 1.0 mmol), KCl (7.7 mg, 0.1 mmol), Fe(NO<sub>3</sub>)<sub>3</sub>•9H<sub>2</sub>O (41.3 mg, 0.1 mmol), and 4-OH-TEMPO (17.9 mg, 0.1 mmol) in THF (1.0 mL) was stirred at 25 °C for 69 h to afford **4ae** (316.3 mg, 87%) [eluent: petroleum ether (60-90 °C)/ethyl acetate = 10:1 (210 mL) to 5:1 (240 mL) to 2:1 (150 mL)] as a pale yellow oil.

### 3.1.3 From **3aec** (lzz-2-031)

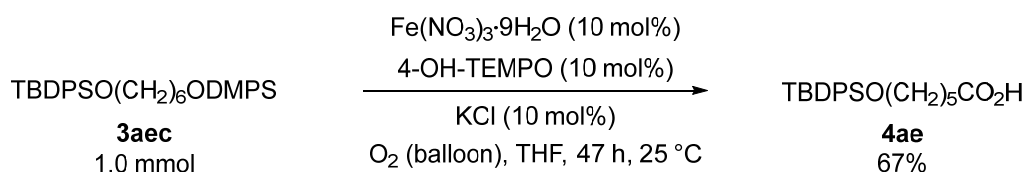

Following **Typical Procedure IV**, the reaction of **3aec** (484.0 mg, 1.0 mmol), KCl (8.0 mg, 0.1 mmol), Fe(NO<sub>3</sub>)<sub>3</sub>•9H<sub>2</sub>O (42.2 mg, 0.1 mmol), and 4-OH-TEMPO (17.5 mg, 0.1 mmol) in THF (1.0 mL) was stirred at 25 °C for 47 h to afford **4ae** (243.9 mg, 67%) [eluent: petroleum ether (60-90 °C, 200 mL) to petroleum ether/ethyl acetate = 10:1 (220 mL) to 5:1 (240 mL) to 2:1 (150 mL)] as a pale yellow oil.

### 3.1.4 From **3aed** (lzz-2-033)

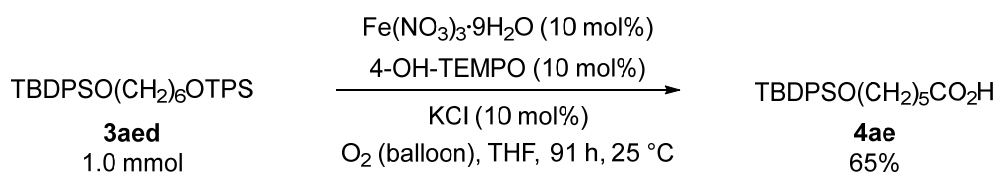

Following **Typical Procedure IV**, the reaction of **3aed** (606.2 mg, 1.0 mmol), KCl (7.9 mg, 0.1 mmol), Fe(NO<sub>3</sub>)<sub>3</sub>•9H<sub>2</sub>O (41.9 mg, 0.1 mmol), and 4-OH-TEMPO (17.5 mg, 0.1 mmol) in THF (1.0 mL) was stirred at 25 °C for 91 h to afford **4ae** (222.4 mg, 65%) [eluent: petroleum ether (60-90 °C, 200 mL) to petroleum ether/ethyl acetate = 10:1 (220 mL) to 5:1 (240 mL) to 2:1 (150 mL)] as a pale yellow oil.



### 3.2 Preparation of 6-(triisopropylsilyloxy)hexanoic acid **4af** (lzz-2-022)

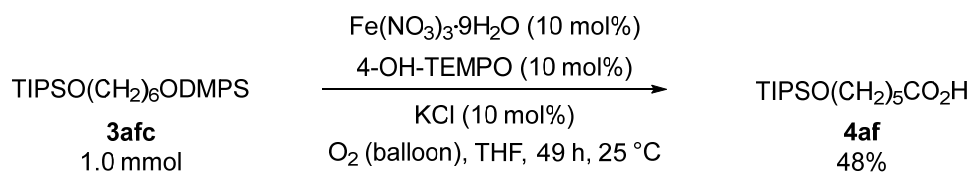

Following **Typical Procedure IV**, the reaction of **3afc** (394.5 mg, 1.0 mmol), KCl (7.3 mg, 0.1 mmol), Fe(NO<sub>3</sub>)<sub>3</sub>•9H<sub>2</sub>O (40.1 mg, 0.1 mmol), and 4-OH-TEMPO (17.7 mg, 0.1 mmol) in THF (1.0 mL) was stirred at 25 °C for 49 h to afford **4af** (134.9 mg, 48%) [eluent: petroleum ether (60-90 °C, 200 mL) to petroleum ether/ethyl acetate = 10:1 (210 mL) to 5:1 (360 mL)] as a pale yellow oil: **<sup>1</sup>H NMR** (400 MHz, CDCl<sub>3</sub>) δ 11.07 (br, 1 H, CO<sub>2</sub>H), 3.68 (t, *J* = 6.4 Hz, 2 H, OCH<sub>2</sub>), 2.37 (t, *J* = 7.4 Hz, 2 H, CH<sub>2</sub>), 1.71-1.62 (m, 2 H, CH<sub>2</sub>), 1.60-1.53 (m, 2 H, CH<sub>2</sub>), 1.46-1.37 (m, 2 H, CH<sub>2</sub>), 1.11-1.01 (m, 21 H, 3 × SiCH and 6 × CH<sub>3</sub>); **<sup>13</sup>C NMR** (100 MHz, CDCl<sub>3</sub>) δ 180.1, 63.1, 34.1, 32.5, 25.3, 24.5, 18.0, 11.9; **MS** (ESI) *m/z* 289 (M+H)<sup>+</sup>; **IR** (neat): ν = 3718, 3029, 2941, 2864, 1709, 1462, 1386, 1365, 1285, 1239, 1103, 1012 cm<sup>-1</sup>; **HRMS** (ESI) calcd. for C<sub>15</sub>H<sub>33</sub>O<sub>3</sub>Si (M+H)<sup>+</sup>: 289.21935, Found: 289.21912.

### 3.3 Preparation of 5-(triisopropylsilyloxy)pentanoic acid **4bf** (lzz-2-027)

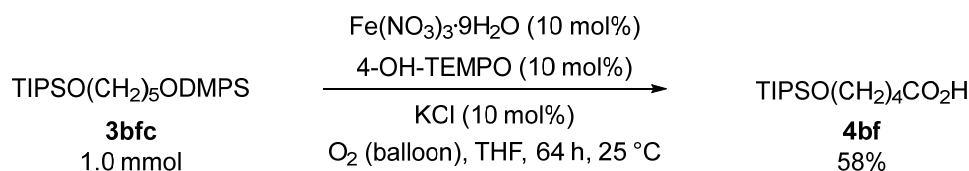

Following **Typical Procedure IV**, the reaction of **3bfc** (388.9 mg, 1.0 mmol), KCl (7.6 mg, 0.1 mmol), Fe(NO<sub>3</sub>)<sub>3</sub>•9H<sub>2</sub>O (40.7 mg, 0.1 mmol), and 4-OH-TEMPO (17.6 mg, 0.1 mmol) in THF (1.0 mL) was stirred at 25 °C for 64 h to afford **4bf** (155.8 mg, 58%) [eluent: petroleum ether (60-90 °C, 100 mL) to petroleum ether/ethyl acetate = 10:1 (220 mL) to 5:1 (240 mL)] as a pale yellow oil: **<sup>1</sup>H NMR** (400 MHz, CDCl<sub>3</sub>) δ 3.71 (t, *J* = 6.0 Hz, 2 H, OCH<sub>2</sub>), 2.40 (t, *J* = 7.2 Hz, 2 H, CH<sub>2</sub>), 1.78-1.68 (m, 2 H, CH<sub>2</sub>), 1.65-1.55 (m, 2 H, CH<sub>2</sub>), 1.14-0.99 (m, 21 H, 3 × SiCH and 6 × CH<sub>3</sub>); **<sup>13</sup>C NMR** (100 MHz, CDCl<sub>3</sub>) δ 180.3, 62.8, 33.8, 32.1, 21.2, 18.0, 11.9; **MS** (ESI) *m/z* 275 (M+H)<sup>+</sup>; **IR** (neat): ν = 2941, 2893, 2865, 1708, 1462, 1412, 1386, 1291, 1246, 1106, 1069, 1012

cm<sup>-1</sup>; **HRMS** (ESI) calcd. for C<sub>14</sub>H<sub>31</sub>O<sub>3</sub>Si (M+H)<sup>+</sup>: 275.20370, Found: 275.20401.

#### 4. Deprotective oxidation of silyl ethers to carboxylic acids with air

##### 4.1 Preparation of 3-phenylpropanoic acid **2c**

###### 4.1.1 With TEMPO as co-catalyst (lzz-3-192)

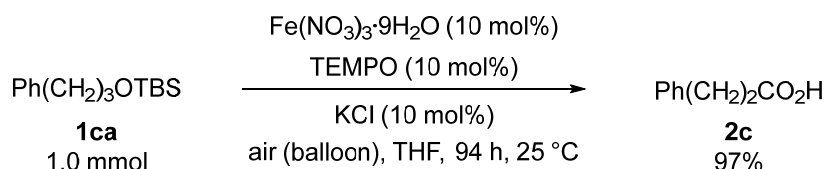

**Typical Procedure V:** To a Schlenk tube were added KCl (7.6 mg, 0.1 mmol), Fe(NO<sub>3</sub>)<sub>3</sub>•9H<sub>2</sub>O (40.8 mg, 0.1 mmol), TEMPO (15.9 mg, 0.1 mmol), **1ca** (249.1 mg, 1.0 mmol), and THF (1.0 mL) sequentially. The resulting mixture was stirred at 25 °C for 94 h as monitored by TLC. After removing the solid by filtration through a short column of silica gel eluted with DCM/methanol = 10:1 (150 mL) and concentration, the residue was purified by column chromatography on silica gel [eluent: petroleum ether (60-90 °C)/ethyl acetate = 5:1 (360 mL) to 2:1 (300 mL)] to afford **2c**<sup>16</sup> (145.8 mg, 97%) as a white solid: <sup>1</sup>H NMR (400 MHz, CDCl<sub>3</sub>) δ 7.34-7.22 (m, 2 H, ArH), 7.25-7.18 (m, 3 H, ArH), 2.96 (t, *J* = 7.6 Hz, 2 H, CH<sub>2</sub>), 2.69 (t, *J* = 7.8 Hz, 2 H, CH<sub>2</sub>); <sup>13</sup>C NMR (100 MHz, CDCl<sub>3</sub>) δ 179.6, 140.1, 128.5, 128.2, 126.3, 35.6, 30.5.

###### 4.1.2 With 4-OH-TEMPO as co-catalyst (lzz-3-186)

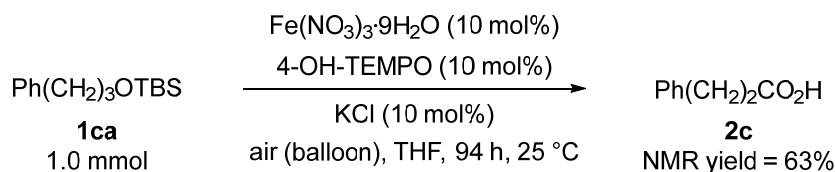

Following **Typical Procedure V**, the reaction of **1ca** (245.4 mg, 1.0 mmol), KCl (7.6 mg, 0.1 mmol), Fe(NO<sub>3</sub>)<sub>3</sub>•9H<sub>2</sub>O (41.5 mg, 0.1 mmol), and 4-OH-TEMPO (17.8 mg, 0.1 mmol) in THF (1.0 mL) was stirred at 25 °C for 94 h to afford **2c** in 63% NMR yield as determined by the <sup>1</sup>H NMR analysis with CH<sub>2</sub>Br<sub>2</sub> as the internal standard.

## 4.2 Preparation of 2-(hexyloxy)acetic acid **2g**

### 4.2.1 With TEMPO as co-catalyst (lzz-5-181)

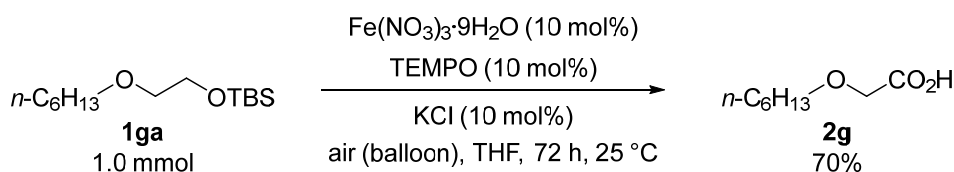

Following **Typical Procedure V**, the reaction of **1ga** (269.3 mg, 1.0 mmol), KCl (7.5 mg, 0.1 mmol),  $\text{Fe}(\text{NO}_3)_3 \cdot 9\text{H}_2\text{O}$  (41.2 mg, 0.1 mmol), and TEMPO (16.3 mg, 0.1 mmol) in THF (1.0 mL) was stirred at 25 °C for 72 h to afford **2g**<sup>16</sup> (119.8 mg, 70%, purity = 95%) [eluent: petroleum ether (60-90 °C)/ethyl acetate = 5:1 (240 mL) to 2:1 (300 mL)] as a yellow oil: **<sup>1</sup>H NMR** (400 MHz,  $\text{CDCl}_3$ )  $\delta$  10.51 (br, 1 H,  $\text{CO}_2\text{H}$ ), 4.13 (s, 2 H,  $\text{CH}_2$ ), 3.55 (t,  $J = 6.8$  Hz, 2 H,  $\text{CH}_2$ ), 1.70-1.55 (m, 2 H,  $\text{CH}_2$ ), 1.42-1.21 (m, 6 H,  $3 \times \text{CH}_2$ ), 0.95-0.81 (m, 3 H,  $\text{CH}_3$ ); **<sup>13</sup>C NMR** (100 MHz,  $\text{CDCl}_3$ )  $\delta$  175.6, 72.0, 67.6, 31.4, 29.2, 25.4, 22.4, 13.8.

### 4.2.2 With 4-OH-TEMPO as co-catalyst (lzz-5-175)

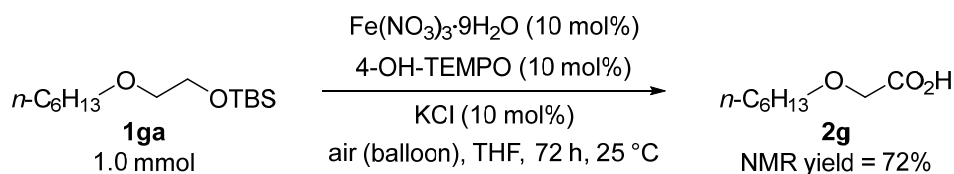

Following **Typical Procedure V**, the reaction of **1ga** (263.1 mg, 1.0 mmol), KCl (7.3 mg, 0.1 mmol),  $\text{Fe}(\text{NO}_3)_3 \cdot 9\text{H}_2\text{O}$  (42.0 mg, 0.1 mmol), and 4-OH-TEMPO (17.5 mg, 0.1 mmol) in THF (1.0 mL) was stirred at 25 °C for 72 h to afford **2g** in 72% NMR yield as determined by the <sup>1</sup>H NMR analysis with  $\text{CH}_2\text{Br}_2$  as the internal standard.

## 4.3 Preparation of 3-(trimethylsilyl)propionic acid **2j** (lzz-4-010)

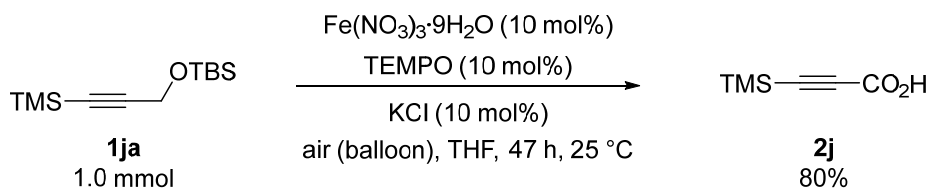

Following **Typical Procedure V**, the reaction of **1ja** (243.1 mg, 1.0 mmol), KCl (7.5 mg, 0.1 mmol),  $\text{Fe}(\text{NO}_3)_3 \cdot 9\text{H}_2\text{O}$  (41.0 mg, 0.1 mmol), and TEMPO (15.9 mg, 0.1

mmol) in THF (1.0 mL) was stirred at 25 °C for 47 h to afford **2j**<sup>16</sup> (113.5 mg, 80%) [eluent: petroleum ether (60-90 °C)/ethyl acetate = 5:1 (240 mL) to 1:1 (200 mL)] as a pale yellow oil: <sup>1</sup>H NMR (400 MHz, CDCl<sub>3</sub>) δ 11.45 (br, 1 H, CO<sub>2</sub>H), 0.26 (s, 9 H, 3 × SiCH<sub>3</sub>); <sup>13</sup>C NMR (100 MHz, CDCl<sub>3</sub>) δ 157.8, 97.4, 93.7, -1.0.

#### 4.4 Preparation of 2-thienylacetic acid **2k** (lzz-4-027)

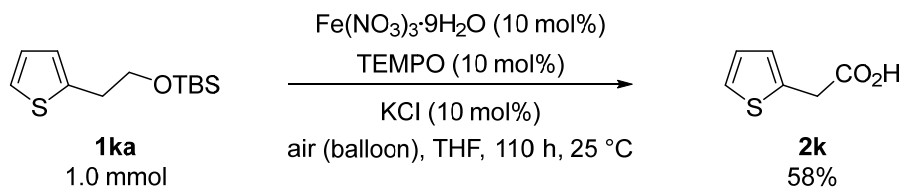

Following **Typical Procedure V**, the reaction of **1ka** (243.1 mg, 1.0 mmol), KCl (7.9 mg, 0.1 mmol), Fe(NO<sub>3</sub>)<sub>3</sub>·9H<sub>2</sub>O (41.3 mg, 0.1 mmol), and TEMPO (15.9 mg, 0.1 mmol) in THF (1.0 mL) was stirred at 25 °C for 110 h to afford **2k**<sup>16</sup> (82.5 mg, 58%) {eluent: petroleum ether [60-90 °C]/ethyl acetate = 5:1 [240 mL] to petroleum ether/ethyl acetate = 2:1 [300 mL, containing formic acid (1%, v/v)]} as a yellow solid: <sup>1</sup>H NMR (400 MHz, CDCl<sub>3</sub>) δ 7.27-7.20 (m, 1 H, ArH), 7.00-6.93 (m, 2 H, ArH), 3.89 (s, 2 H, CH<sub>2</sub>); <sup>13</sup>C NMR (100 MHz, CDCl<sub>3</sub>) δ 177.1, 133.9, 127.2, 126.9, 125.3, 35.0.

#### 4.5 Preparation of 6-((1,1-dimethylethyl)diphenylsilyloxy)hexanoic acid **4ae** (lzz-4-002)

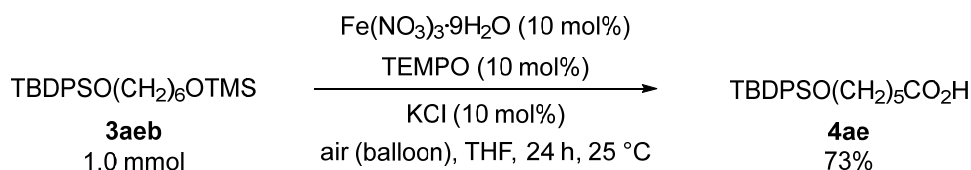

Following **Typical Procedure V**, the reaction of **3aeb** (425.3 mg, 1.0 mmol), KCl (7.9 mg, 0.1 mmol), Fe(NO<sub>3</sub>)<sub>3</sub>·9H<sub>2</sub>O (41.4 mg, 0.1 mmol), and TEMPO (15.9 mg, 0.1 mmol) in THF (1.0 mL) was stirred at 25 °C for 24 h to afford **4ae**<sup>21</sup> (275.5 mg, 73%, purity = 98%) [eluent: petroleum ether (60-90 °C)/ethyl acetate = 10:1 (220 mL) to 5:1 (240 mL) to 2:1 (150 mL)] as a pale yellow oil: <sup>1</sup>H NMR (400 MHz, CDCl<sub>3</sub>) δ 7.71-7.62 (m, 4 H, ArH), 7.46-7.32 (m, 6 H, ArH), 3.66 (t, *J* = 6.4 Hz, 2 H, CH<sub>2</sub>), 2.33 (t, *J* = 7.6 Hz, 2 H, CH<sub>2</sub>), 1.68-1.51 (m, 4 H, 2 × CH<sub>2</sub>), 1.47-1.36 (m, 2 H, CH<sub>2</sub>), 1.04 (s, 9

H, 3 × CH<sub>3</sub>); <sup>13</sup>C NMR (100 MHz, CDCl<sub>3</sub>) δ 180.2, 135.4, 133.9, 129.4, 127.6, 63.5, 34.0, 32.0, 26.7, 25.2, 24.3, 19.1.

## 5. Formal syntheses of bioactive molecules 10 (from 2m) and 11 (from 2n)

### 5.1 Synthesis of 3-(2-acetoxyphenyl)-3-methylbutanoic acid 2m

#### 5.1.1 Synthesis of 2-(4-(*tert*-butyldimethylsilyloxy)-2-methylbutan-2-yl)phenyl acetate 1ma<sup>22,23</sup> (lzz-1-75, lzz-1-77, lzz-2-110, lzz-2-117)

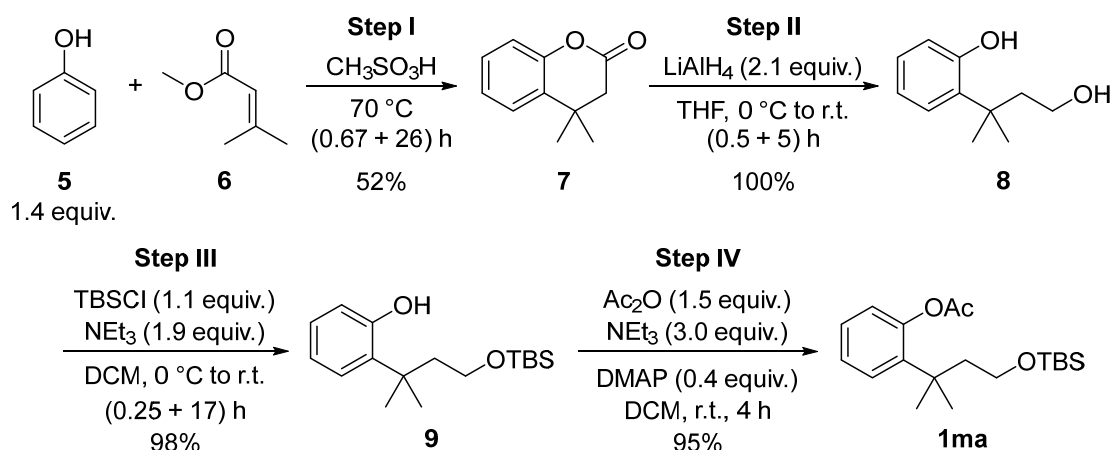

**Step I:** To a flask were added phenol **5** (2604.5 mg, 27.7 mmol). The atmosphere was reduced using a water pump and refilled with nitrogen for three times. Methanesulfonic acid (25 mL) was then added to the flask. The resulting solution was stirred at 70 °C and **6** (2371.4 mg, 20.8 mmol) was added dropwise over 40 min. The resulting solution was stirred at 70 °C for another 26 h, cooled to room temperature, poured into ice water, and extracted with ethyl acetate (60 mL × 3). The combined organic layer was washed with a saturated solution of NaHCO<sub>3</sub> (aq., 60 mL × 3) and a saturated solution of NaCl (aq., 60 mL) sequentially. The organic layer was dried over anhydrous Na<sub>2</sub>SO<sub>4</sub>. After filtration, the filtrate was concentrated and the residue was purified by column chromatography on silica gel [eluent: petroleum ether (60-90 °C, 200 mL) to petroleum ether/ethyl acetate = 50:1 (1500 mL) to 5:1 (300 mL)] to afford **7** (1894.8 mg, 52%) as a pale yellow oil: <sup>1</sup>H NMR (300 MHz, CDCl<sub>3</sub>) δ 7.36-7.21 (m, 2 H, ArH), 7.20-7.11 (m, 1 H, ArH), 7.09-7.03 (m, 1 H, ArH), 2.63 (s, 2 H, CH<sub>2</sub>), 1.36 (s, 6 H, 2 × CH<sub>3</sub>); <sup>13</sup>C NMR (75 MHz, CDCl<sub>3</sub>) δ 168.2, 150.6, 131.7, 128.2, 124.7, 124.3, 117.0, 43.5, 33.2, 27.6.

**Step II:** A dried flask was degassed and refilled with nitrogen for three times. To this flask were added LiAlH<sub>4</sub> (857.2 mg, 22.6 mmol) and anhydrous THF (30 mL). A solution of **7** (1862.0 mg, 10.6 mmol) in THF (15 mL) was added dropwise to the flask in an ice-water bath over 30 min. The resulting mixture was stirred at room temperature for another 5 h and quenched with a saturated solution of NH<sub>4</sub>Cl (aq., 20 mL). After filtration through a short column of silica gel eluted with ethyl acetate (50 mL), the filtrate was washed with a saturated solution of NaCl (aq., 50 mL × 2) and dried over anhydrous Na<sub>2</sub>SO<sub>4</sub>. After removing the solid by filtration, the filtrate was evaporated to afford crude **8** (1912.0 mg, 100%) as a pale yellow solid: <sup>1</sup>H NMR (300 MHz, CDCl<sub>3</sub>) δ 7.20 (d, *J* = 7.8 Hz, 1 H, ArH), 7.10-7.01 (m, 1 H, ArH), 6.89-6.80 (m, 1 H, ArH), 6.62 (d, *J* = 7.5 Hz, 1 H, ArH), 6.14-5.89 (m, 1 H, ArOH), 3.53 (t, *J* = 7.2 Hz, 2 H, CH<sub>2</sub>), 2.22 (t, *J* = 7.0 Hz, 2 H, CH<sub>2</sub>), 1.76-1.66 (m, 1 H, OH), 1.41 (s, 6 H, 2 × CH<sub>3</sub>); <sup>13</sup>C NMR (75 MHz, CDCl<sub>3</sub>) δ 154.8, 133.7, 127.5, 127.4, 120.1, 116.6, 61.0, 42.6, 36.6, 28.6.

**Step III:** A dried flask was degassed and refilled with argon for three times. To this flask were added **8** (2052.5 mg, 11.4 mmol), anhydrous DCM (13 mL), and NEt<sub>3</sub> (3.0 mL, 0.728 g/mL, 2.1840 g, 21.6 mmol). The solution was stirred in an ice-water bath and a solution of TBSCl (1935.2 mg, 12.6 mmol) in anhydrous DCM (10 mL) was added dropwise over 15 min. The resulting mixture was stirred at room temperature for another 17 h. After filtration, the filtrate was washed with H<sub>2</sub>O (20 mL × 2) and dried over anhydrous Na<sub>2</sub>SO<sub>4</sub>. After removing the solid by filtration, the filtrate was concentrated and the residue was purified by column chromatography on silica gel [eluent: petroleum ether (60-90 °C)/ethyl acetate = 10:1 (220 mL)] to afford **9** (3280.7 mg, 98%) as a pale yellow oil: <sup>1</sup>H NMR (400 MHz, CDCl<sub>3</sub>) δ 7.19 (d, *J* = 7.6 Hz, 1 H, ArH), 7.06 (t, *J* = 7.6 Hz, 1 H, ArH), 6.85 (t, *J* = 7.6 Hz, 1 H, ArH), 6.68 (d, *J* = 7.6 Hz, 1 H, ArH), 5.60-5.52 (m, 1 H, ArOH), 3.49 (t, *J* = 7.2 Hz, 2 H, CH<sub>2</sub>), 2.11 (t, *J* = 7.0 Hz, 2 H, CH<sub>2</sub>), 1.40 (s, 6 H, 2 × CH<sub>3</sub>), 0.85 (s, 9 H, 3 × CH<sub>3</sub>), -0.02 (s, 6 H, 2 × SiCH<sub>3</sub>); <sup>13</sup>C NMR (100 MHz, CDCl<sub>3</sub>) δ 154.5, 134.3, 127.6, 127.2, 120.4, 117.0, 61.3, 43.4, 36.6, 28.9, 25.9, 18.3, -5.4.

**Step IV:** A dried Schlenk tube was degassed and refilled with argon for three times.

To this Schlenk tube were added **9** (1471.7 mg, 5.0 mmol)/anhydrous DCM (10 mL), Ac<sub>2</sub>O (800.0 mg, 7.7 mmol), NEt<sub>3</sub> (2.1 mL, 0.728 g/mL, 1.5288 g, 15.1 mmol), and DMAP (240.8 mg, 2.0 mmol) sequentially. The solution was stirred at room temperature for 4 h, quenched with H<sub>2</sub>O (10 mL), and extracted with ethyl acetate (50 mL × 2). The combined organic layer was dried over anhydrous Na<sub>2</sub>SO<sub>4</sub>. After removing the solid by filtration, the filtrate was concentrated and the residue was purified by column chromatography on silica gel [eluent: petroleum ether (60-90 °C, 100 mL)/ethyl acetate = 20:1 (210 mL)] to afford **1ma** (1602.6 mg, 95%) as a colorless liquid: <sup>1</sup>H NMR (400 MHz, CDCl<sub>3</sub>) δ 7.33 (d, *J* = 8.0 Hz, 1 H, ArH), 7.25-7.18 (m, 1 H, ArH), 7.18-7.11 (m, 1 H, ArH), 6.99 (d, *J* = 8.0 Hz, 1 H, ArH), 3.40 (t, *J* = 7.4 Hz, 2 H, CH<sub>2</sub>), 2.32 (s, 3 H, CH<sub>3</sub>), 2.00 (t, *J* = 7.2 Hz, 2 H, CH<sub>2</sub>), 1.36 (s, 6 H, 2 × CH<sub>3</sub>), 0.84 (s, 9 H, 3 × CH<sub>3</sub>), -0.05 (s, 6 H, 2 × SiCH<sub>3</sub>); <sup>13</sup>C NMR (100 MHz, CDCl<sub>3</sub>) δ 169.3, 149.1, 138.9, 128.0, 127.0, 125.7, 124.0, 60.5, 44.4, 36.7, 29.1, 25.9, 21.7, 18.2, -5.4; MS (EI) *m/z* (%) 336 (M<sup>+</sup>, 2.38), 150 (100); IR (neat): ν = 2955, 2930, 2857, 1766, 1469, 1442, 1367, 1253, 1185, 1087, 1048, 1006 cm<sup>-1</sup>.

### 5.1.2 Synthesis of the carboxylic acid **2m**

#### 5.1.2.1 With 4-OH-TEMPO as co-catalyst (lzz-2-118)

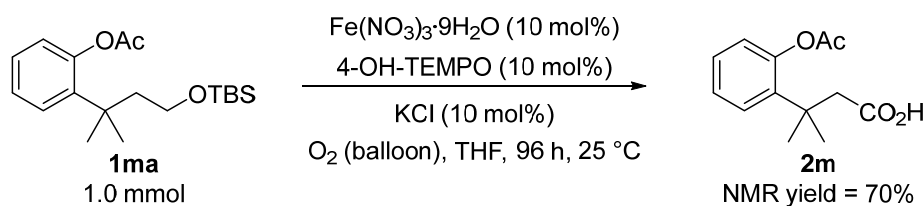

Following **Typical Procedure III**, the reaction of **1ma** (332.4 mg, 1.0 mmol), KCl (7.9 mg, 0.1 mmol), Fe(NO<sub>3</sub>)<sub>3</sub>•9H<sub>2</sub>O (40.9 mg, 0.1 mmol), and 4-OH-TEMPO (17.5 mg, 0.1 mmol) in THF (1.0 mL) was stirred at room temperature for 96 h to afford **2m** in 70% NMR yield as determined by the <sup>1</sup>H NMR analysis with CH<sub>2</sub>Br<sub>2</sub> as the internal standard.

#### 5.1.2.2 With TEMPO as co-catalyst (lzz-2-119)

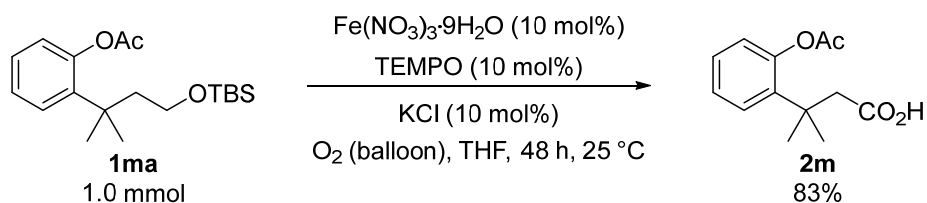

Following **Typical Procedure IV**, the reaction of **1ma** (335.0 mg, 1.0 mmol), KCl (7.5 mg, 0.1 mmol),  $\text{Fe(NO}_3)_3 \cdot 9\text{H}_2\text{O}$  (40.6 mg, 0.1 mmol), and TEMPO (16.1 mg, 0.1 mmol) in THF (1.0 mL) was stirred at 25 °C for 48 h to afford **2m**<sup>22</sup> (196.1 mg, 83%) [eluent: petroleum ether (60-90 °C)/ethyl acetate = 5:1 (480 mL) to 2:1 (360 mL)] as a pale yellow solid: **m.p.** 97.2-98.1 °C (*n*-hexane/ethyl acetate); **<sup>1</sup>H NMR** (400 MHz,  $\text{CDCl}_3$ )  $\delta$  7.41-7.35 (m, 1 H, ArH), 7.28-7.22 (m, 1 H, ArH), 7.20-7.14 (m, 1 H, ArH), 7.06-7.00 (m, 1 H, ArH), 2.79 (s, 2 H,  $\text{CH}_2$ ), 2.35 (s, 3 H,  $\text{CH}_3$ ), 1.47 (s, 6 H, 3  $\times$   $\text{CH}_3$ ); **<sup>13</sup>C NMR** (100 MHz,  $\text{CDCl}_3$ )  $\delta$  176.4, 169.3, 148.8, 137.9, 127.8, 127.5, 125.8, 124.0, 45.6, 36.5, 28.4, 21.7; **MS** (ESI)  $m/z$  259 ( $\text{M}+\text{Na}$ )<sup>+</sup>; **IR** (neat):  $\nu$  = 3500-2400, 1764, 1716, 1483, 1442, 1420, 1407, 1368, 1242, 1192, 1176, 1164, 1082, 1008  $\text{cm}^{-1}$ .

## 5.2 Synthesis of 3-(2-(2-(acetyloxy)acetyl)oxy)phenyl-3-methylbutanoic acid **2n**

### 5.2.1 Synthesis of 2-(4-(*tert*-butyldimethylsilyloxy)-2-methylbutan-2-yl)phenyl 2-(acetyloxy)acetate **1na** (lzz-2-125)

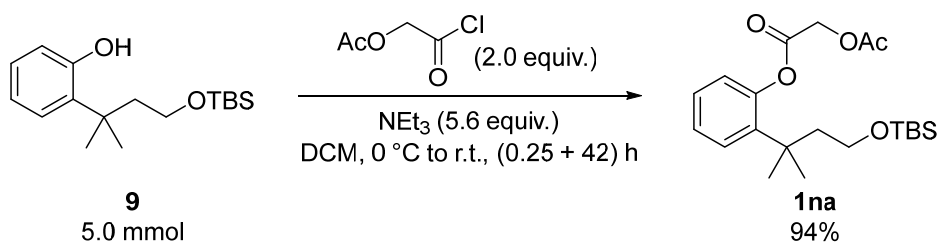

A dried flask was degassed and refilled with argon for three times. To this flask were added phenol **9** (1433.1 mg, 5.0 mmol), anhydrous DCM (100 mL), and  $\text{NEt}_3$  (3.9 mL, 0.728 g/mL, 2.8392 g, 27.8 mmol) subsequently. The solution was stirred in an ice-water bath and 2-(acetyloxy)acetyl chloride (1.1 mL, 1.27 g/mL, 1.3970 g, 10.0 mmol) was added dropwise over 15 min. The resulting solution was stirred at room temperature for 42 h, quenched with  $\text{H}_2\text{O}$  (50 mL) in an ice-water bath, and extracted with DCM (25 mL  $\times$  3). The combined organic layer was dried over anhydrous  $\text{Na}_2\text{SO}_4$ . After removing the solid by filtration, the filtrate was concentrated and the residue was



purified by column chromatography on silica gel [eluent: petroleum ether (60-90 °C)/ethyl acetate = 20:1 (210 mL)] to afford **1na**<sup>24</sup> as a pale yellow oil (1805.4 mg, 94%): <sup>1</sup>H NMR (400 MHz, CDCl<sub>3</sub>) δ 7.37-7.32 (m, 1 H, ArH), 7.26-7.15 (m, 2 H, ArH), 7.05-7.01 (m, 1 H, ArH), 4.87 (s, 2 H, CH<sub>2</sub>), 3.40 (t, *J* = 7.4 Hz, 2 H, OCH<sub>2</sub>), 2.20 (s, 3 H, CH<sub>3</sub>), 1.98 (t, *J* = 7.4 Hz, 2 H, CH<sub>2</sub>), 1.36 (s, 6 H, 2 × CH<sub>3</sub>), 0.83 (s, 9 H, 3 × CH<sub>3</sub>), -0.06 (s, 6 H, 2 × SiCH<sub>3</sub>); <sup>13</sup>C NMR (100 MHz, CDCl<sub>3</sub>) δ 170.2, 166.4, 148.5, 138.9, 128.2, 127.1, 126.1, 123.6, 61.0, 60.4, 44.4, 36.8, 29.1, 25.9, 20.4, 18.2, -5.5; MS (ESI) *m/z* 395 (M+H)<sup>+</sup>; IR (neat): ν = 2954, 2930, 2884, 2857, 1784, 1756, 1471, 1442, 1421, 1382, 1253, 1233, 1183, 1161, 1083, 1050 cm<sup>-1</sup>.

## 5.2.2 Synthesis of the carboxylic acid **2n**

### 5.2.2.1 With 4-OH-TEMPO as co-catalyst (lzz-2-127)

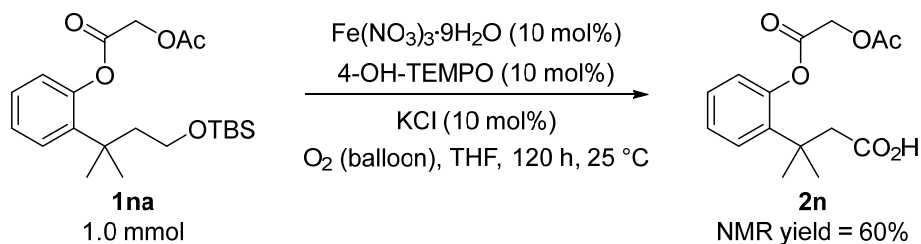

Following **Typical Procedure IV**, the reaction of **1na** (392.2 mg, 1.0 mmol), KCl (7.9 mg, 0.1 mmol), Fe(NO<sub>3</sub>)<sub>3</sub>·9H<sub>2</sub>O (40.6 mg, 0.1 mmol), and 4-OH-TEMPO (17.8 mg, 0.1 mmol) in THF (1.0 mL) was stirred at 25 °C for 120 h to afford **2n** in 60% NMR yield as determined by the <sup>1</sup>H NMR analysis with CH<sub>2</sub>Br<sub>2</sub> as the internal standard.

### 5.2.2.2 With TEMPO as co-catalyst (lzz-2-128)

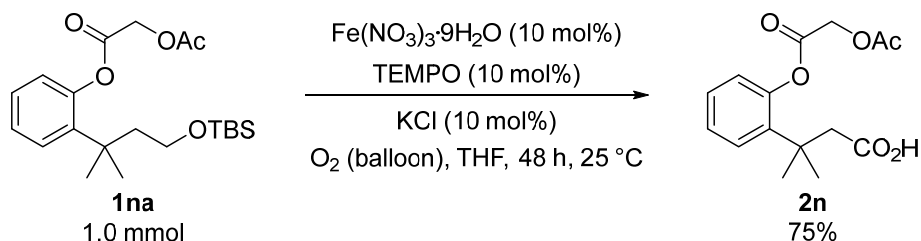

Following **Typical Procedure IV**, the reaction of **1na** (394.3 mg, 1.0 mmol), KCl (7.8 mg, 0.1 mmol), Fe(NO<sub>3</sub>)<sub>3</sub>·9H<sub>2</sub>O (40.6 mg, 0.1 mmol), and TEMPO (15.9 mg, 0.1 mmol) in THF (1.0 mL) was stirred at 25 °C for 48 h to afford **2n**<sup>24</sup> (222.8 mg, 75%) [eluent: petroleum ether (60-90 °C)/ethyl acetate = 5:1 (480 mL) to 2:1 (600 mL)] as a

pale yellow solid: **m.p.** 99.5-100.5 °C (DCM); **<sup>1</sup>H NMR** (400 MHz, CDCl<sub>3</sub>) δ 7.38 (d, *J* = 7.6 Hz, 1 H, ArH), 7.27-7.14 (m, 2 H, ArH), 7.05 (d, *J* = 7.6 Hz, 1 H, ArH), 4.86 (s, 2 H, CH<sub>2</sub>), 2.77 (s, 2 H, CH<sub>2</sub>), 2.18 (s, 3 H, CH<sub>3</sub>), 1.45 (s, 6 H, 2 × CH<sub>3</sub>); **<sup>13</sup>C NMR** (100 MHz, CDCl<sub>3</sub>) δ 177.3, 170.3, 166.3, 148.2, 137.9, 127.9, 127.5, 126.1, 123.5, 61.0, 45.6, 36.4, 28.4, 20.3; **MS** (ESI) *m/z* 317 (M+Na)<sup>+</sup>; **IR** (neat): ν = 3400-2700, 1779, 1750, 1705, 1487, 1442, 1419, 1382, 1234, 1186, 1160, 1080, 1048 cm<sup>-1</sup>.

## References

1. C. Behloul, D. Guijarro and M. Yus, *Tetrahedron*, 2005, **61**, 6908.
2. A. Iida, A. Horii, T. Misaki and Y. Tanabe, *Synthesis*, 2005, **16**, 2677.
3. C. Gryparis and M. Stratakis, *Chem. Commun.*, 2012, **48**, 10751.
4. G. A. Olah and D. A. Klumpp, *Synthesis*, 1997, **7**, 744.
5. B. A. D'Sa, D. McLeod and J. G. Verkade, *J. Org. Chem.*, 1997, **62**, 5057.
6. C. Dietz, R. B. Clark, F. C. Nichols and M. B. Smith, *J Labelled Comp Radiopharm*, 2017, **60**, 274.
7. C.-E. Yeom, Y. J. Kim, S. Y. Lee, Y. J. Shin and B. M. Kim, *Tetrahedron*, 2005, **61**, 12227.
8. M. E. Kobierski, S. Kim, K. K. Murthi, R. S. Iyer and R. G. Salomon, *J. Org. Chem.*, 2002, **59**, 6044.
9. A. C. Bissemer, A. Levina, G. C. Fu, *J. Am. Chem. Soc.*, 2012, **134**, 14232.
10. T. Ikawa, K. Hattori, H. Sajiki and K. Hirota, *Tetrahedron*, 2004, **60**, 6901.
11. B. Radaram, F. Pisaneschi, Y. Rao, P. Yang, D. Piwnica-Worms and M. M. Alauddin, *Eur. J. Med. Chem.*, 2019, **182**, 111571.
12. K. Kuciński and G. Hreczycho, *ChemCatChem*, 2022, **14**, e202200794.
13. P. Svec, Z. Nový, J. Kučka, M. Petřík, O. Sedláček, M. Kuchař, B. Lišková, M. Medvedíková, K. Kolouchová, O. Groborz, L. Loukotová, R. Ł. Konefał, M. Hajdúch and M. Hrubý, *J. Med. Chem.*, 2020, **63**, 15960.
14. S. Hamada, K. Sugimoto, E. E. Elboray, T. Kawabata and T. Furuta, *Org. Lett.*, 2020, **22**, 5486.
15. J. Li, S. Qu and W. Zhao, *Angew. Chem. Int. Ed.*, 2020, **132**, 2380.
16. X. Jiang, J. Zhang and S. Ma, *J. Am. Chem. Soc.*, 2016, **138**, 8344.
17. P. Shao, S. Wang, C. Chen and C. Xi, *Org. Lett.*, 2016, **18**, 2050.
18. P.-F. Dai, J.-P. Qu and Y.-B. Kang, *Org. Lett.*, 2019, **21**, 1393.
19. L. V. Heumann and G. E. Keck, *Org. Lett.*, 2007, **9**, 1951.
20. M. Wang, M. Gao, K. D. Miller and Q.-H. Zheng, *Steroids*, 2011, **76**, 1331.
21. W. Oppolzer, R. N. Radinov and E. El-Sayed, *J. Org. Chem.*, 2001, **66**, 4766.
22. B. Wang, Y. Zheng, K. Ji, B. Yu and Z. Pan, WO2016161445 A1, 2016.
23. H. Saneyoshi, T. Ohta, Y. Hiyoshi, T. Saneyoshi and A. Ono, *Org. Lett.*, 2019, **21**, 862.
24. J. G. Bauman, M. Yang, N. Hoang, E. Cunningham and J. L. Cleland, WO2020069353 A1, 2020.

Izz-3-064-H-2  
Oct 19 2023  
Scans = 4  
Solvent = CDCl3  
SF1 = 400.031799 MHz  
SF2 = 100.596855 MHz

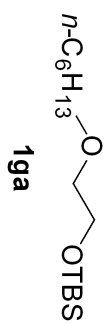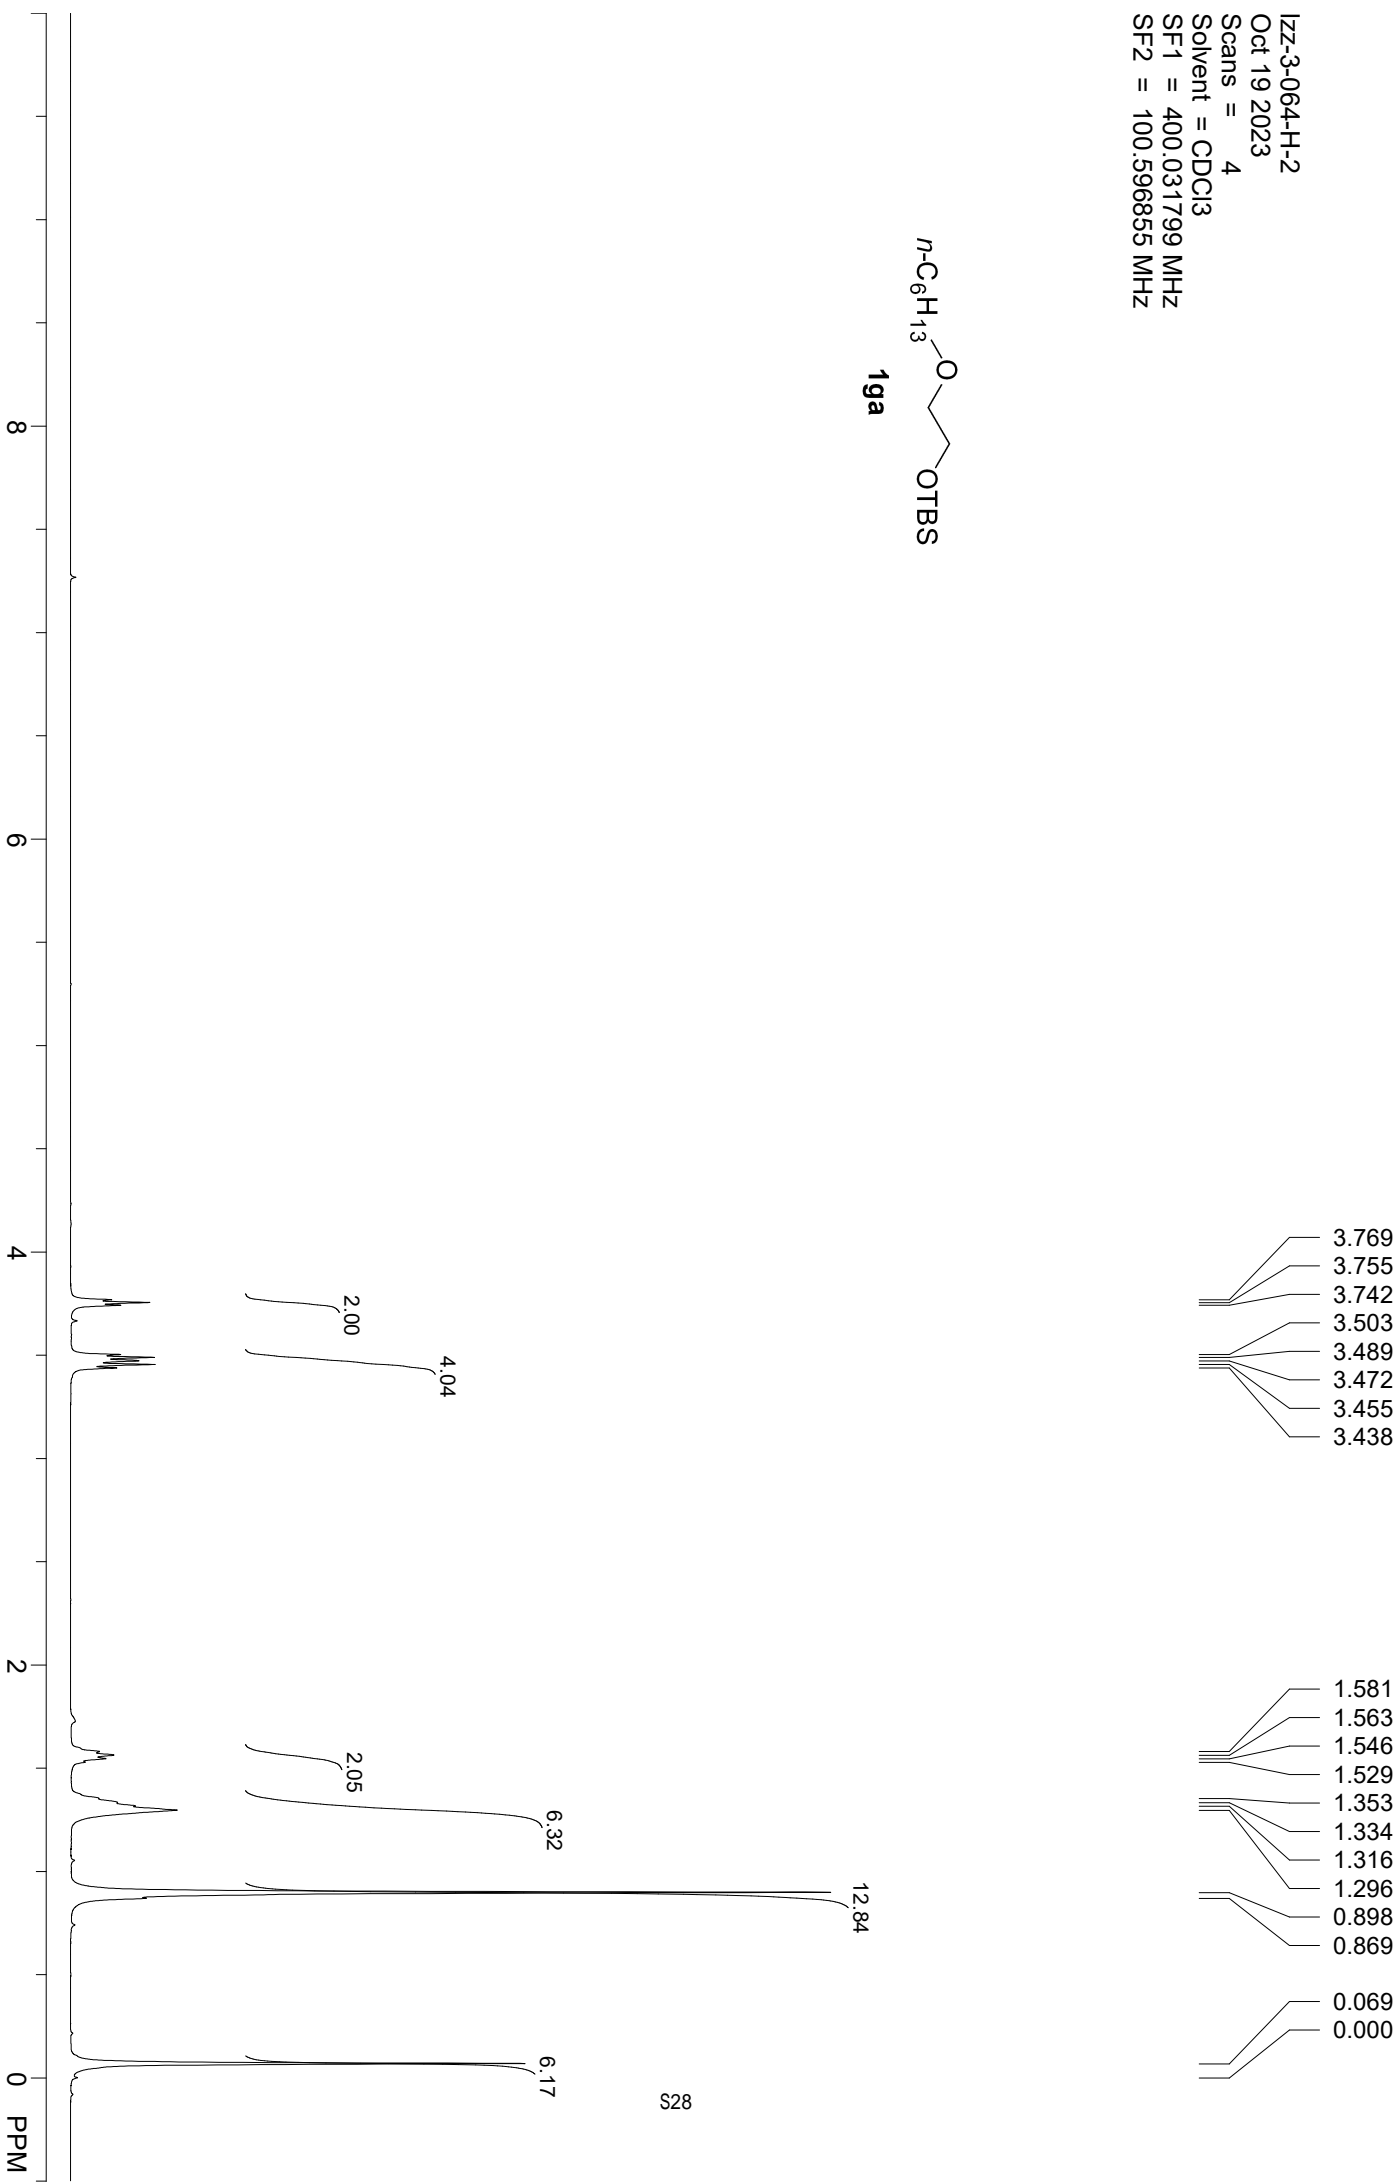

lzz-3-064  
CDCI3  
Sun Oct 22 01:16:54 2023  
Scans = 120  
SF1 = 100.617798 MHz  
SF2 = 1.000000 MHz

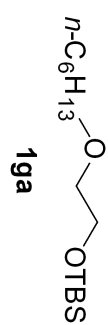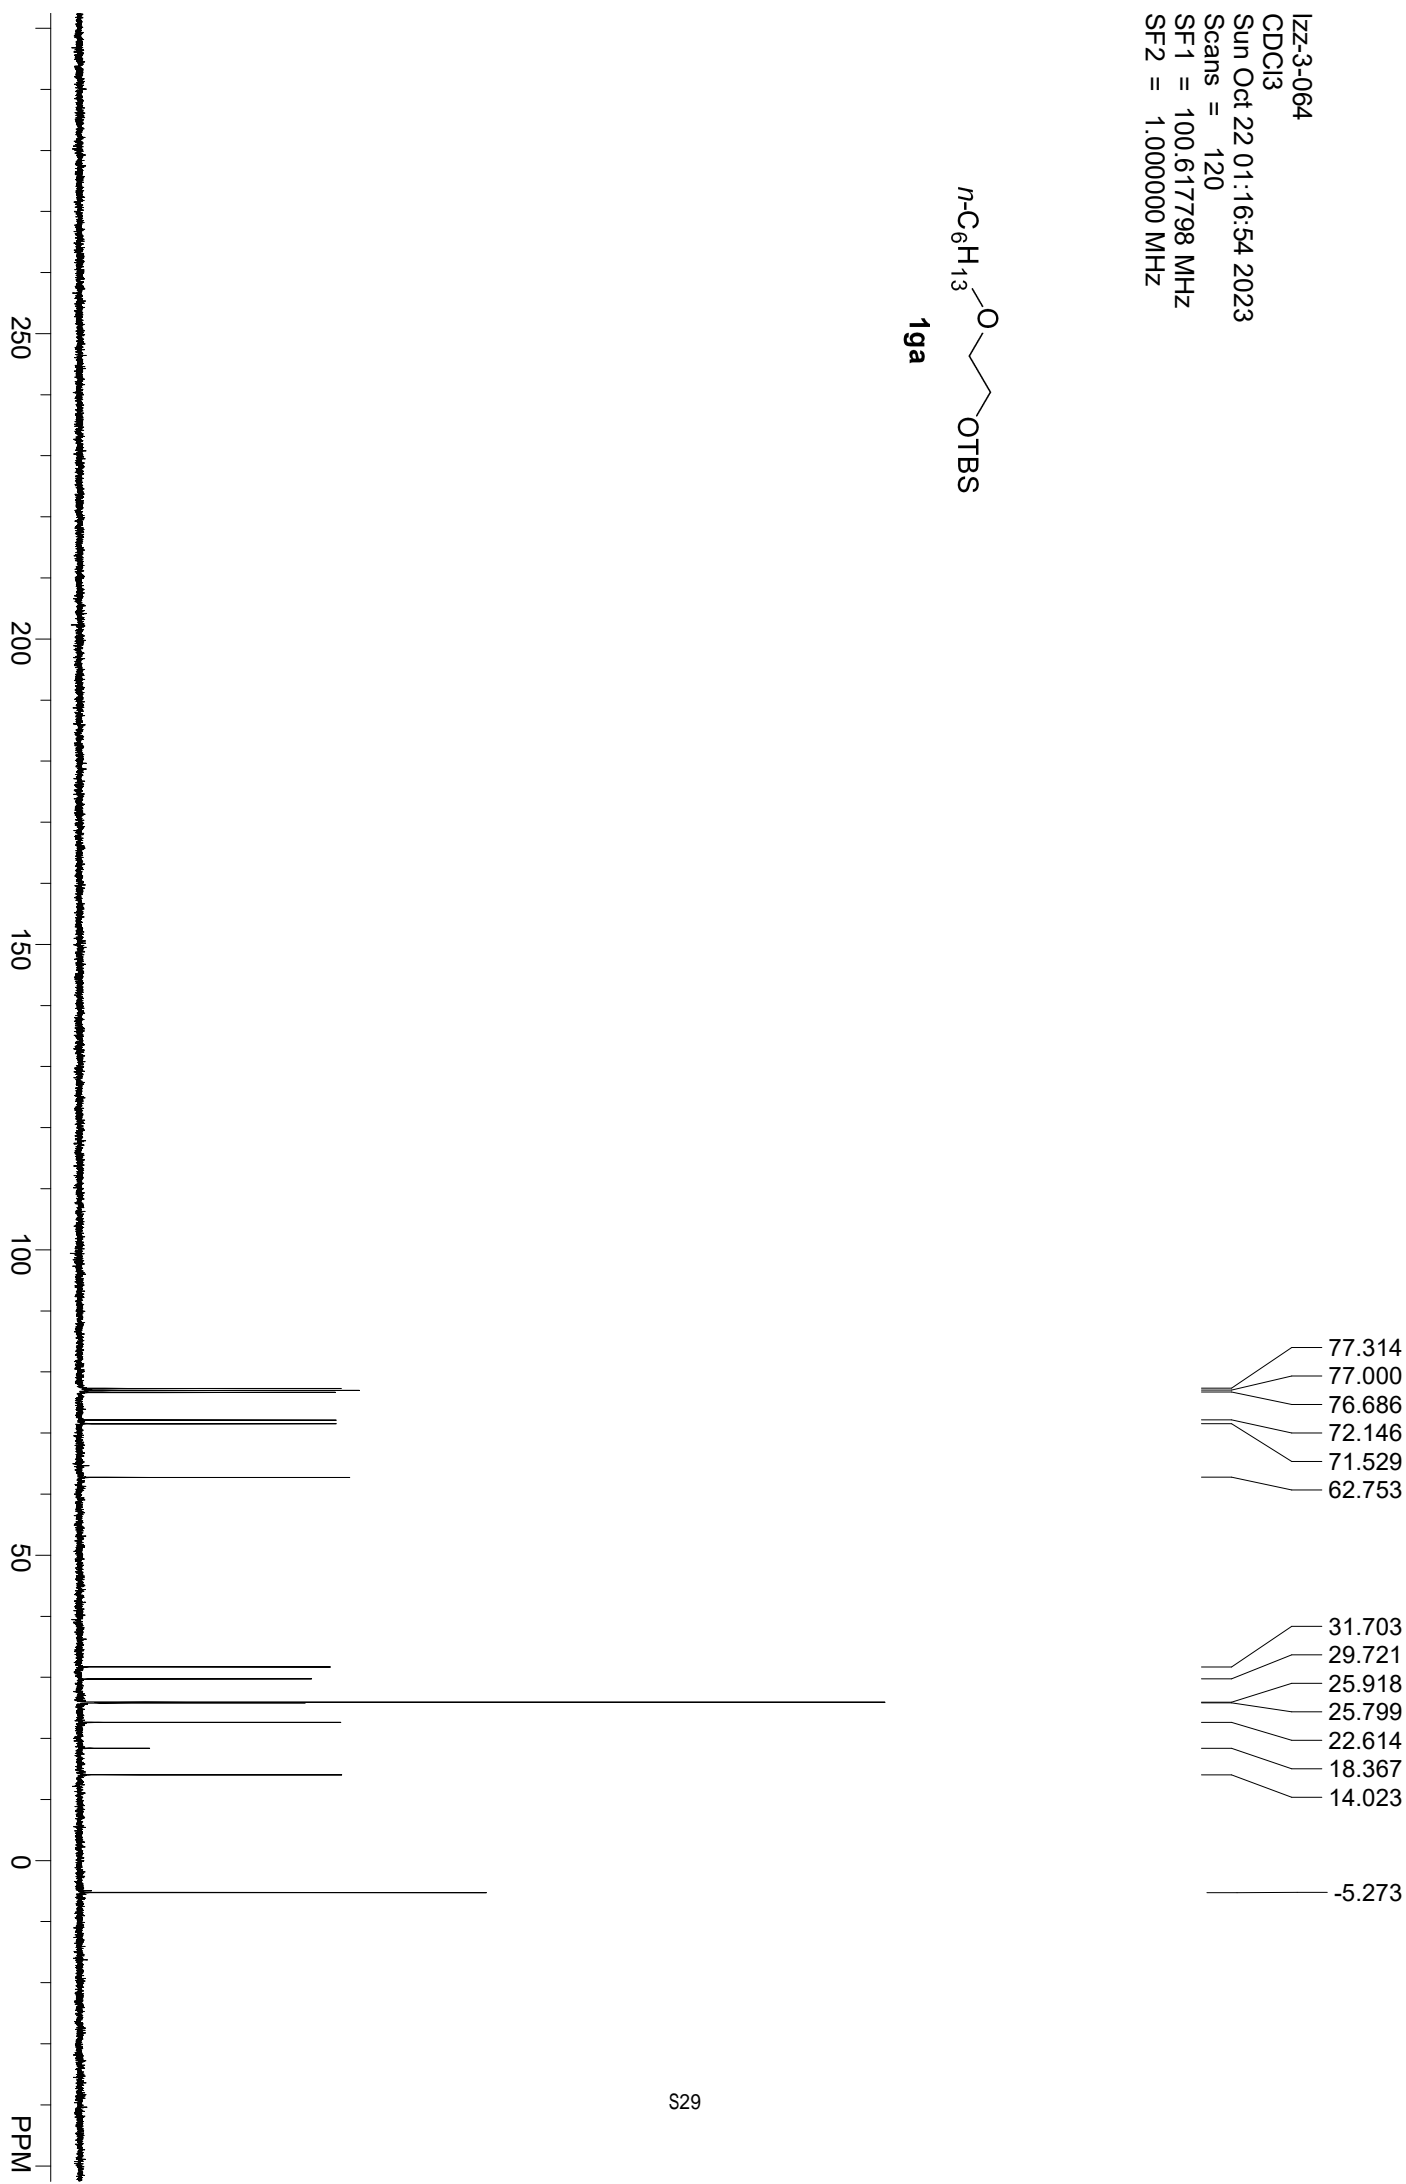

IZZ-3-064-test-2  
purity = 98%  
27.9 mg of product with 5.0\*10<sup>-6</sup> L mesitylene  
Oct 19 2023  
Scans = 4  
Solvent = cdcl3  
SF1 = 400.031403 MHz  
SF2 = 100.596855 MHz

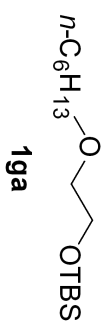

$$\text{purity} = \frac{5.0 \times 0.864}{120.19} \times \frac{3}{2} \times 1.94 \times 260.49 \div 27.9 \approx 98\%$$

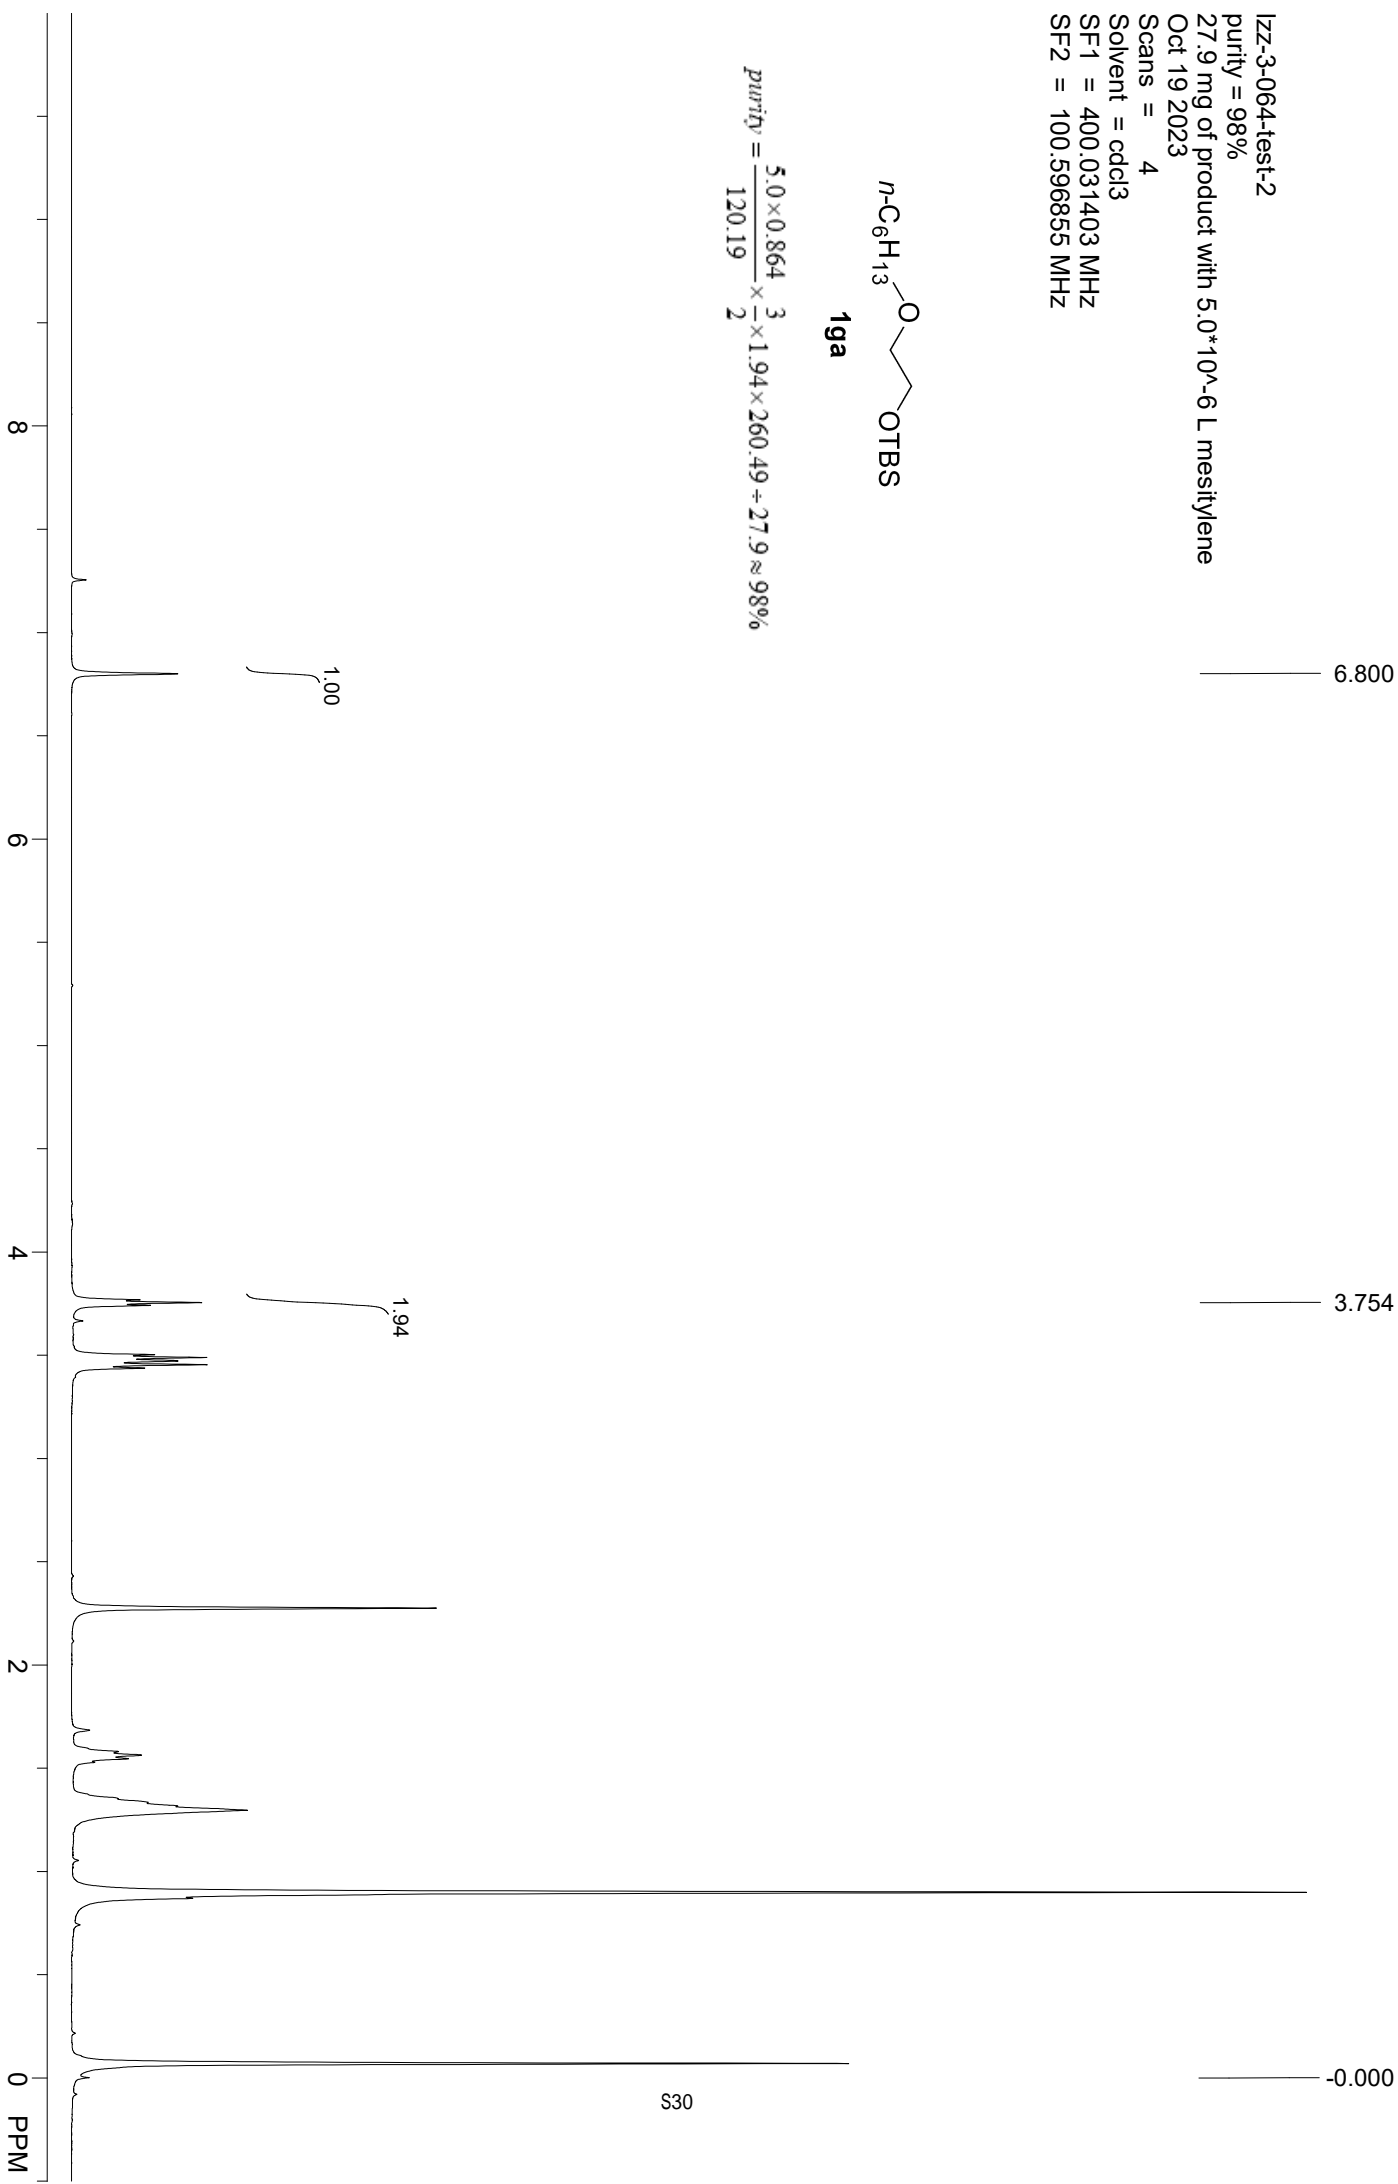

Izz-2-049-H  
Jan 7 2024  
Scans = 4  
Solvent = cdcl3  
SF1 = 399.717651 MHz  
SF2 = 100.517960 MHz

7.675  
7.657  
7.436  
7.418  
7.401  
7.392  
7.373  
7.357

3.667  
3.651  
3.634  
3.571  
3.554  
3.537

1.599  
1.580  
1.566  
1.548  
1.533  
1.516  
1.499  
1.481  
1.402  
1.385  
1.364  
1.345  
1.328  
1.309  
1.292  
1.271  
1.044  
0.106  
0.000

TBDPSO(CH<sub>2</sub>)<sub>6</sub>OTMS

3aeb

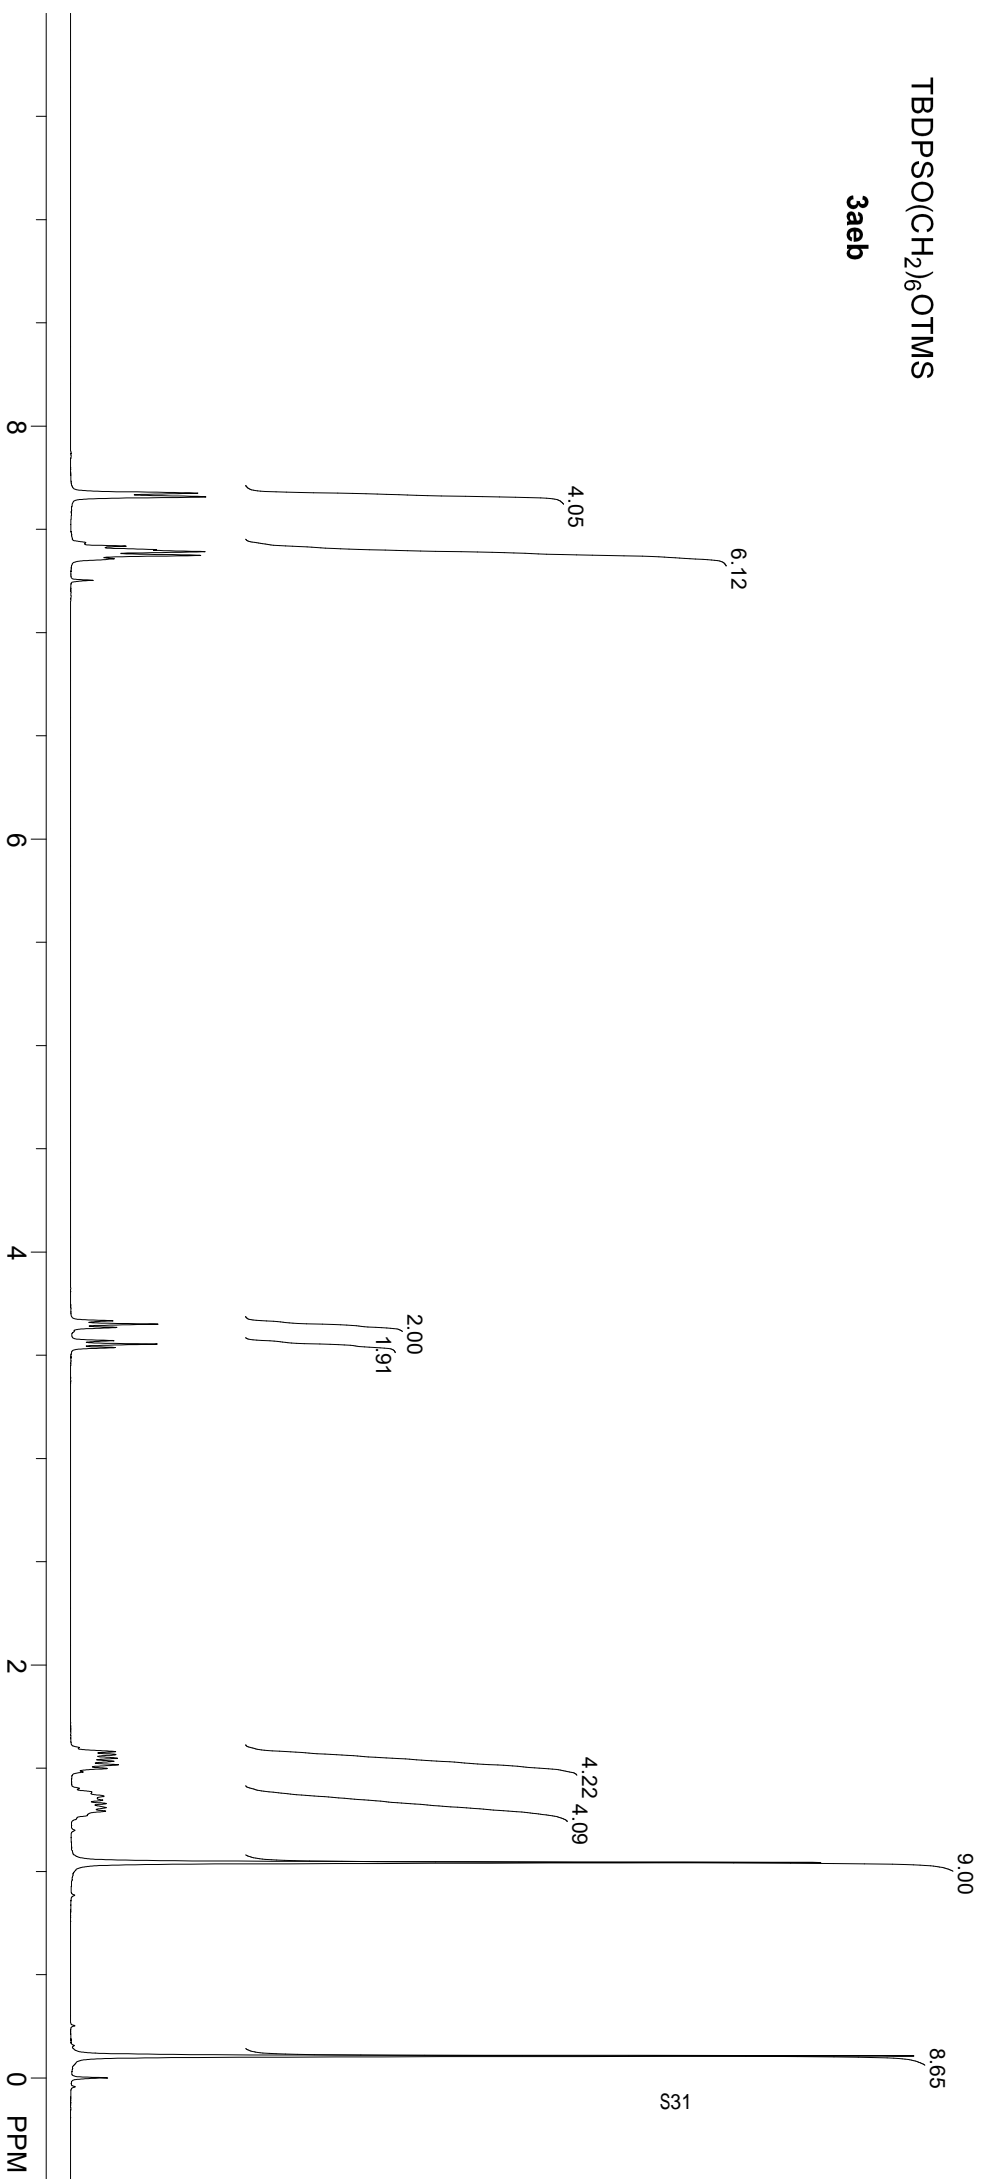

IZZ-2-049-C  
Mar 6 2022  
Scans = 68  
Solvent = cdcl3  
SF1 = 100.598389 MHz  
SF2 = 400.030792 MHz

TBDPSO(CH<sub>2</sub>)<sub>6</sub>OTMS

3aeb

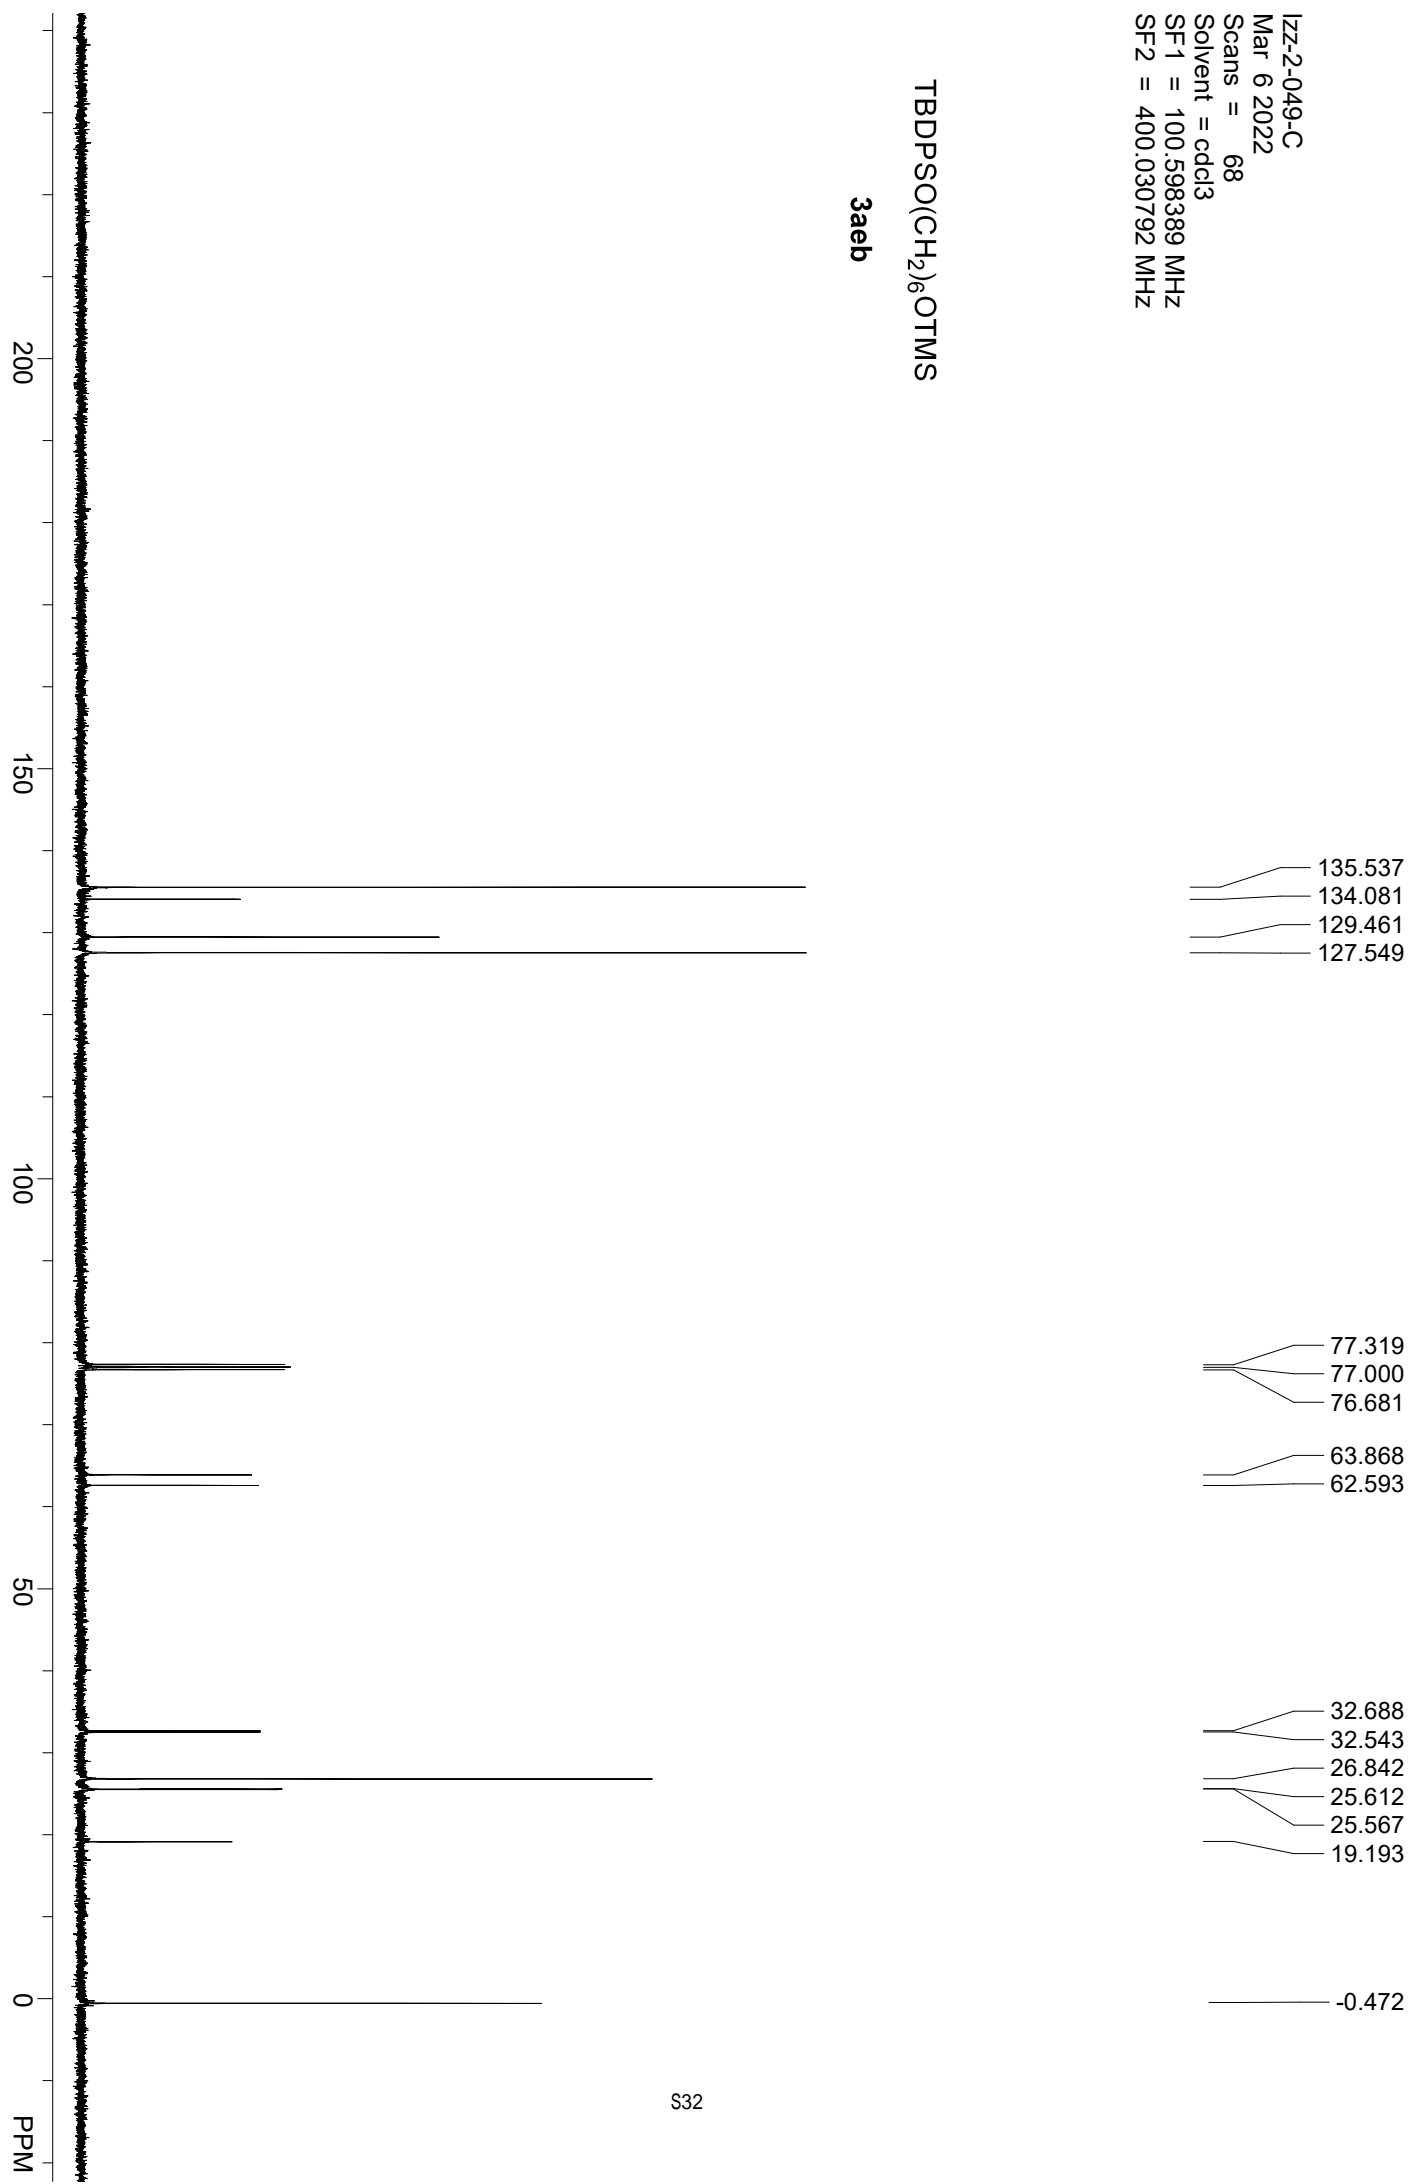



lzz-2-024-H  
Feb 18 2022  
Scans = 4  
Solvent = CDCl3  
SF1 = 399.717865 MHz  
SF2 = 100.517960 MHz

7.671  
7.655  
7.576  
7.565  
7.401  
7.377  
7.361

3.648  
3.632  
3.616  
3.582  
3.566  
3.549

1.572  
1.554  
1.537  
1.529  
1.521  
1.513  
1.496  
1.480  
1.322  
1.303  
1.271  
1.043  
0.367  
0.000

TBDPSO(CH<sub>2</sub>)<sub>6</sub>ODMPS

3aec

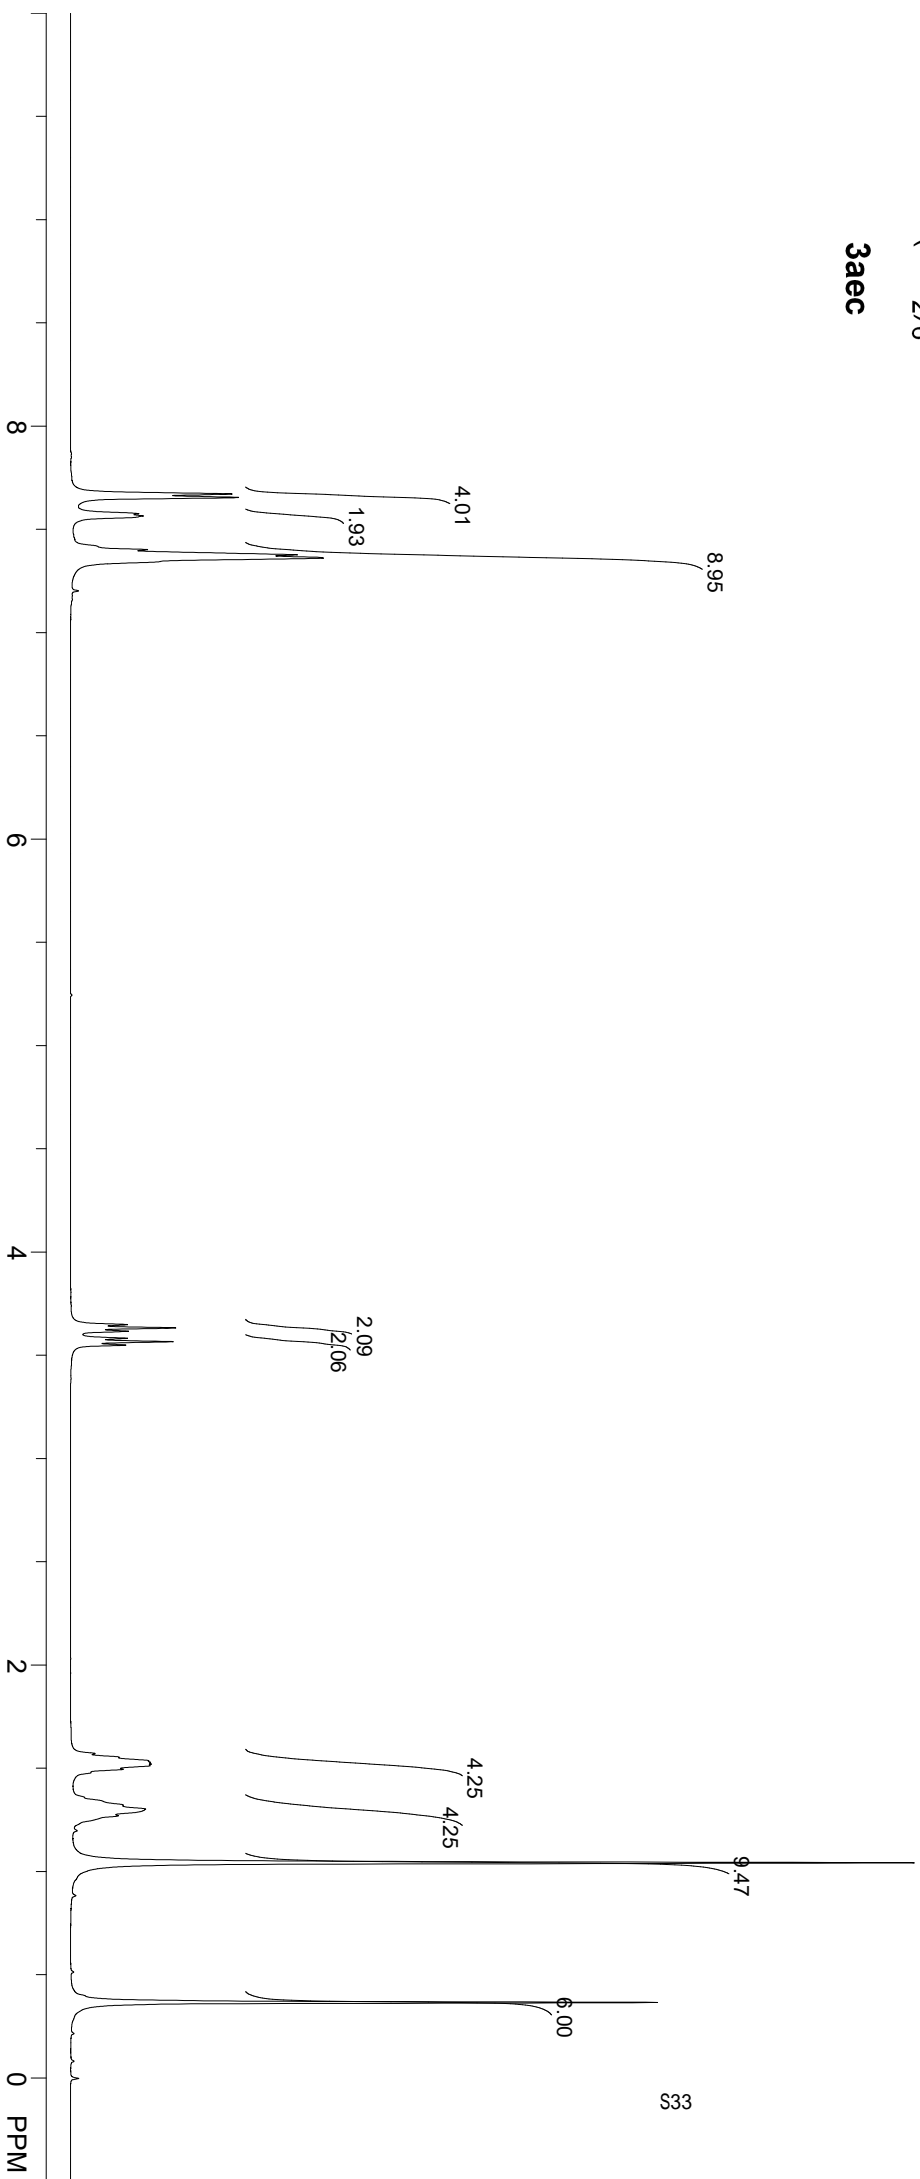

lzz-2-024-C  
Feb 20 2022  
Scans = 24  
Solvent = cdcl3  
SF1 = 100.519485 MHz  
SF2 = 399.717072 MHz

TBDPSO(CH<sub>2</sub>)<sub>6</sub>ODMPS

3aec

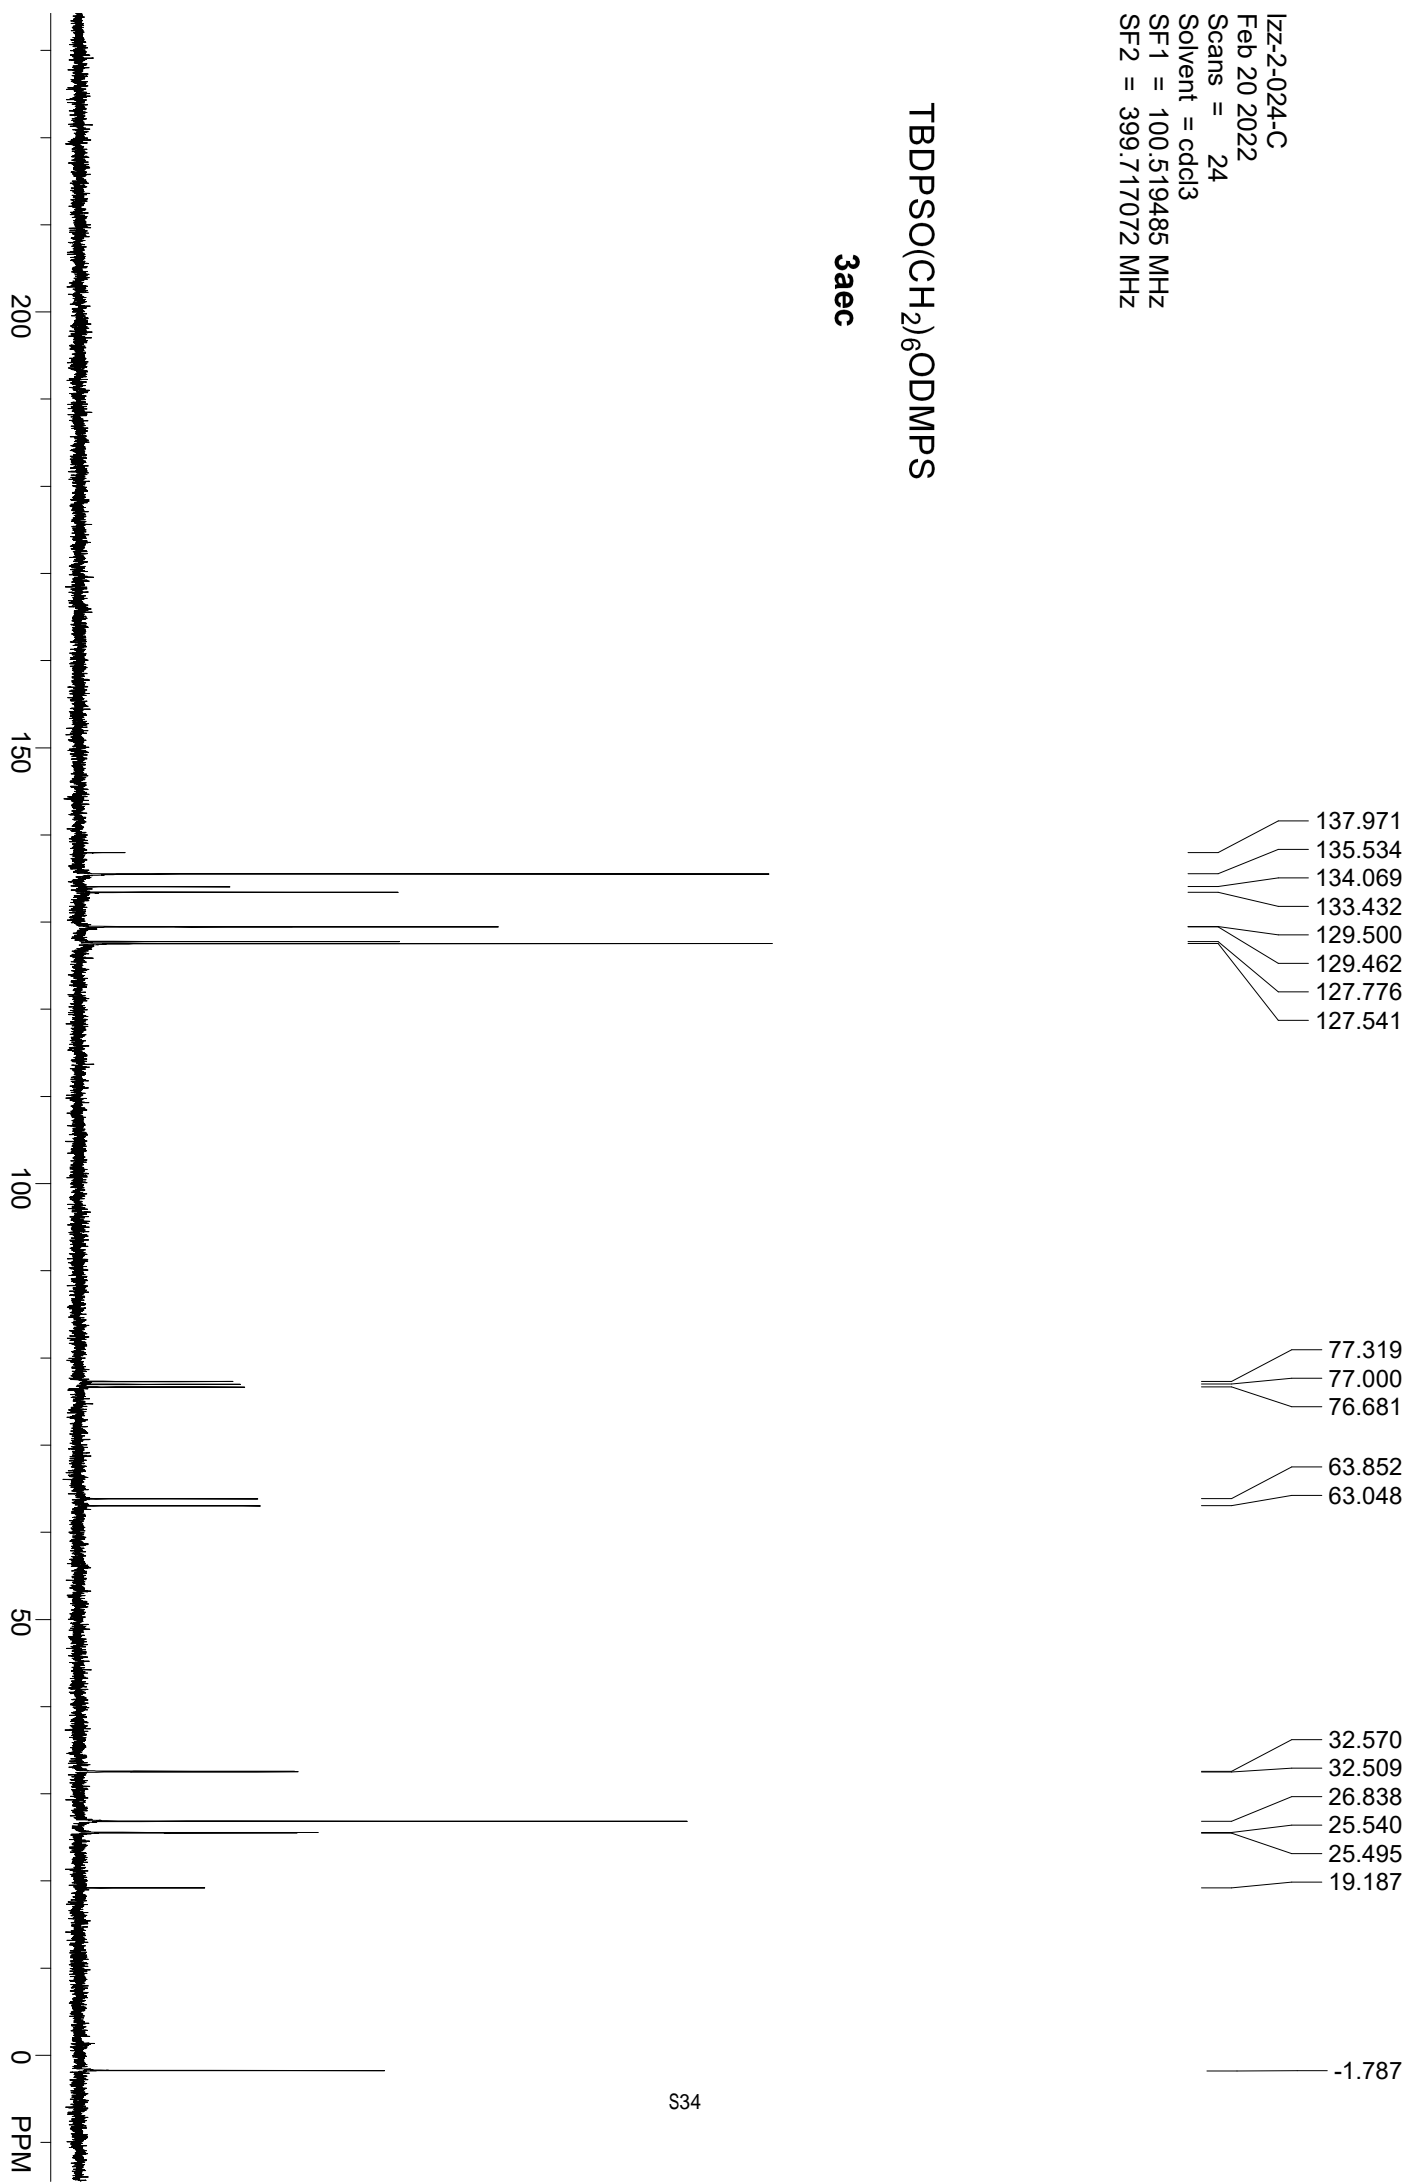

IZZ-2-025-H  
Feb 20 2022  
Scans = 4  
Solvent = CDCl3  
SF1 = 399.717865 MHz  
SF2 = 100.517960 MHz

7.662  
7.643  
7.625  
7.605  
7.423  
7.402  
7.383  
7.366  
7.354

3.782  
3.766  
3.750  
3.626  
3.610  
3.594

1.582  
1.567  
1.551  
1.537  
1.514  
1.498  
1.298  
1.034

0.000

# TBDPSO(CH2)<sub>6</sub>OTPS

## 3aed

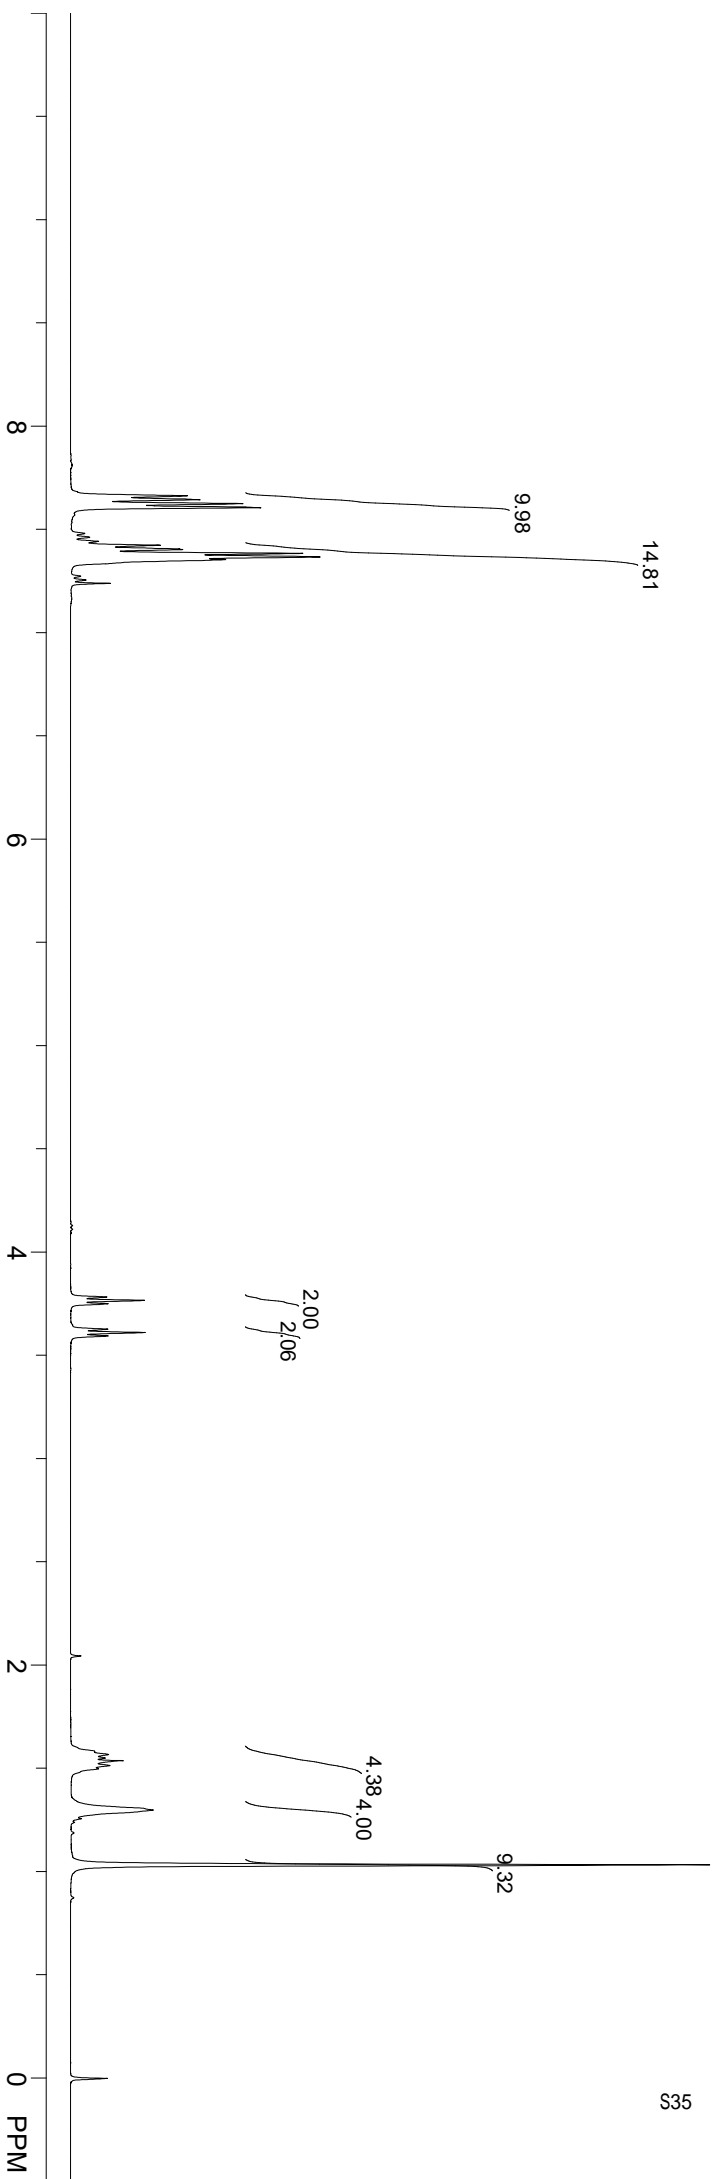

lzz-2-025-C  
Feb 21 2022  
Scans = 92  
Solvent = cdcl3  
SF1 = 100.598389 MHz  
SF2 = 400.030792 MHz

# TBDPSO(CH<sub>2</sub>)<sub>6</sub>OTPS

**3aed**

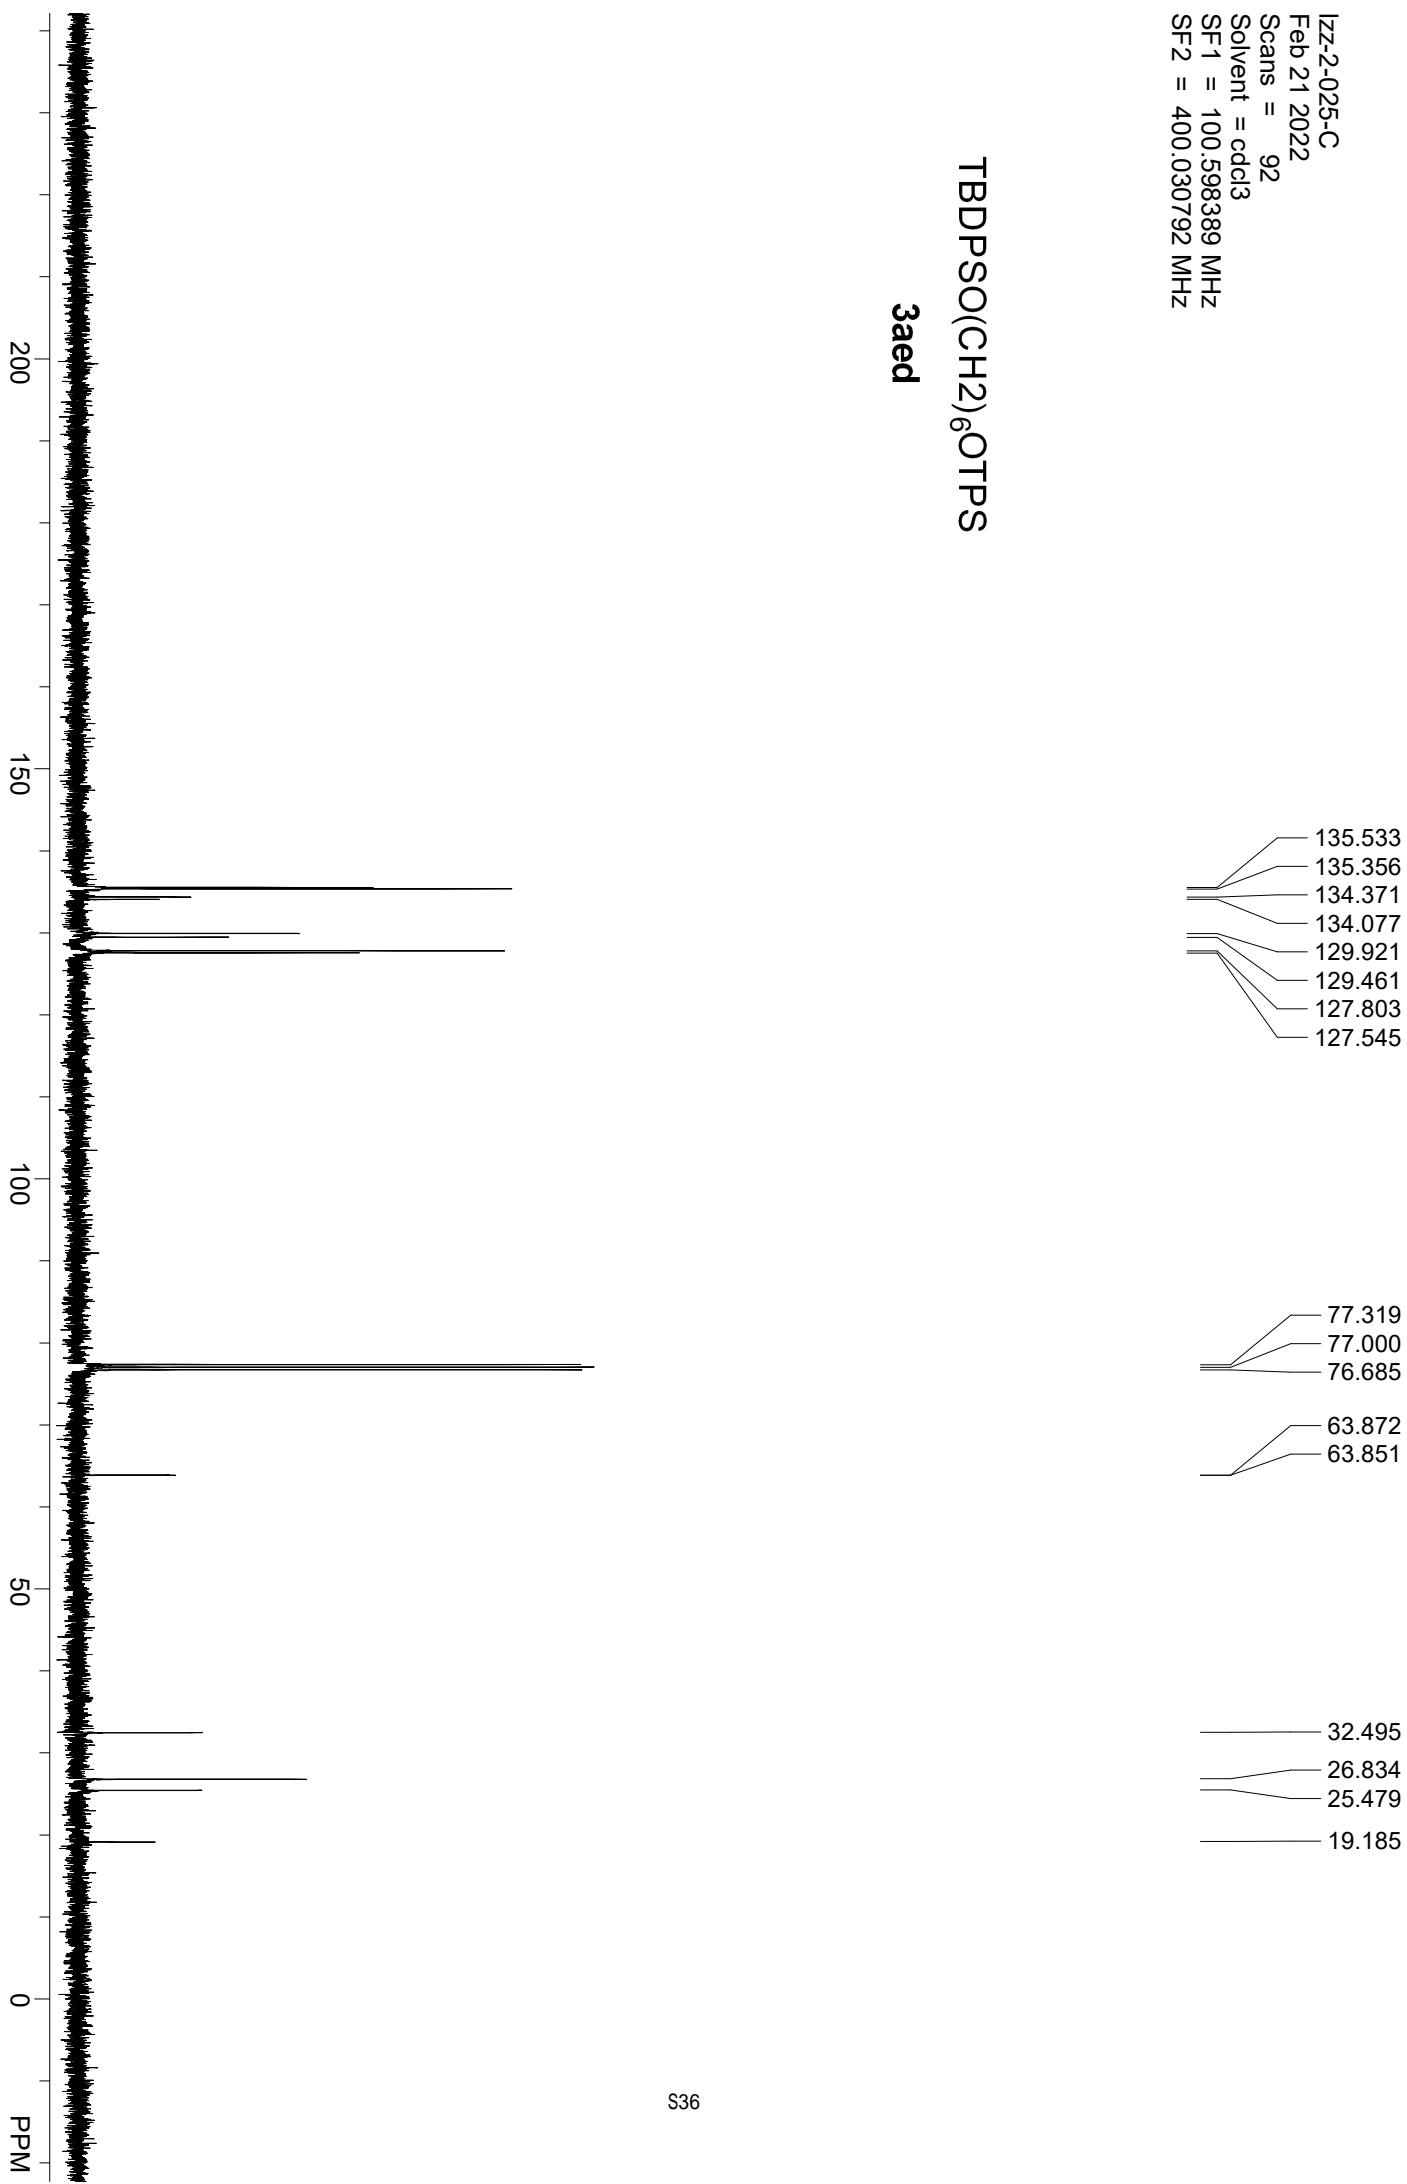

lzz-2-025-test  
purity = 93%  
23.5 mg of product with 10.0\*10^-6 L dibromomethane  
Feb 20 2022  
Scans = 4  
Solvent = cdcl3  
SF1 = 399.717865 MHz  
SF2 = 100.517960 MHz

# TBDPSO(CH2)<sub>6</sub>OTPS

**3aed**

$$\text{purity} = \frac{10.0 \times 2.477}{173.83} \times \frac{2}{2} \times 0.25 \times 614.98 \div 23.5 \approx 93\%$$

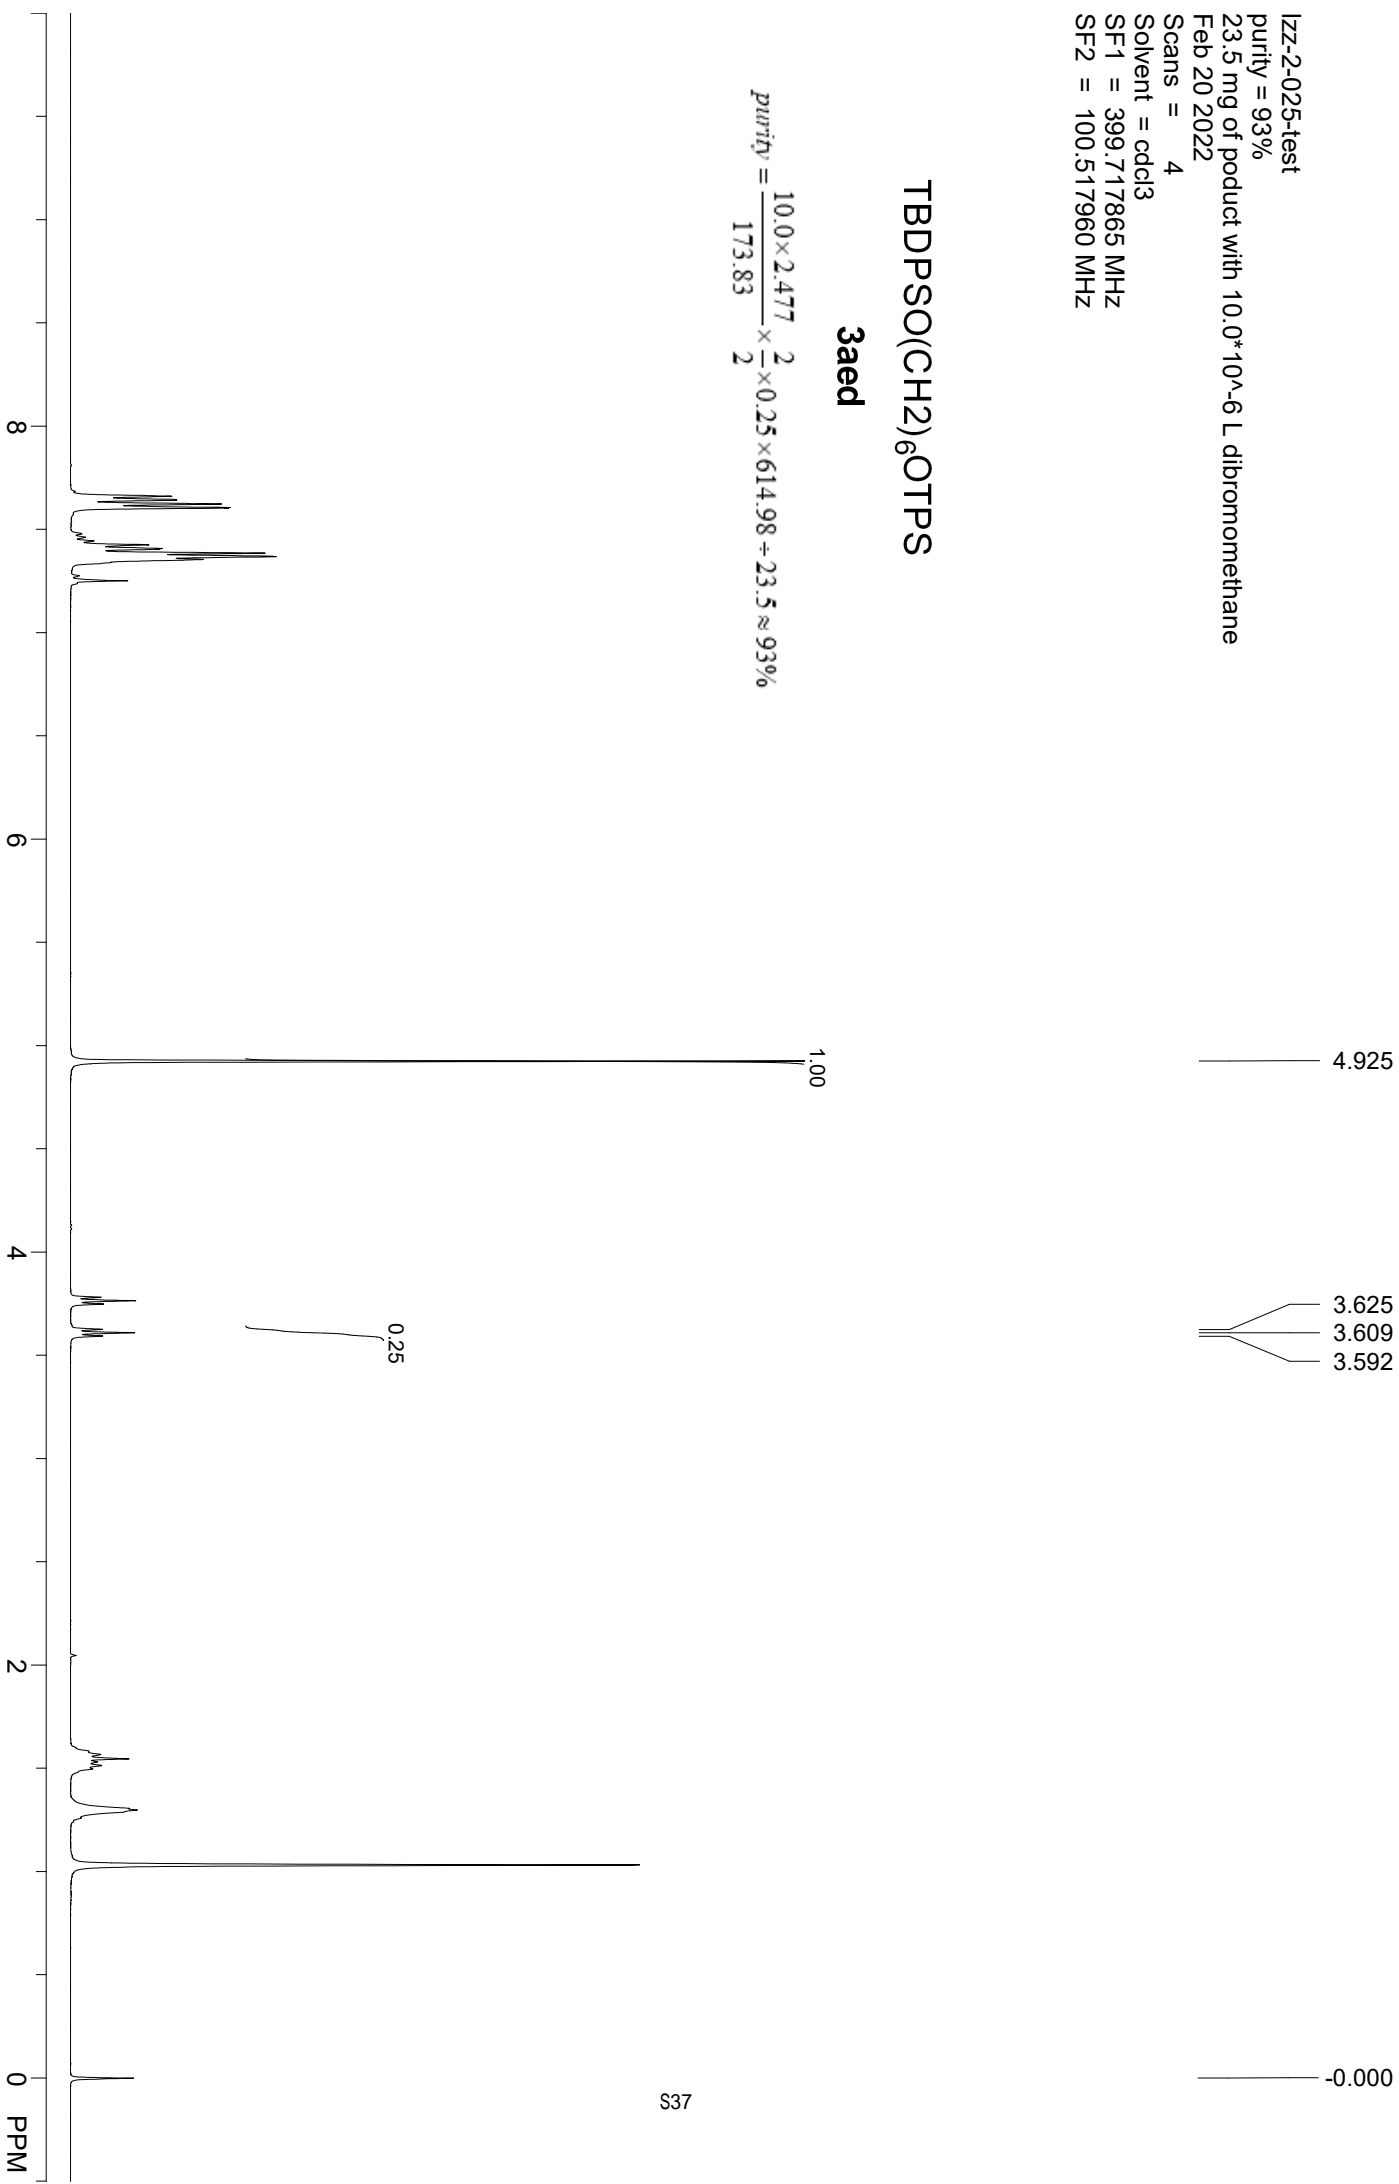

Izz-2-016-H  
Feb 9 2022  
Scans = 4  
Solvent = CDCl3  
SF1 = 400.031616 MHz  
SF2 = 100.596855 MHz

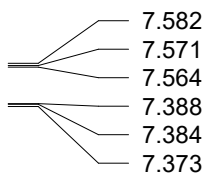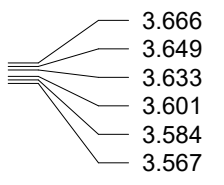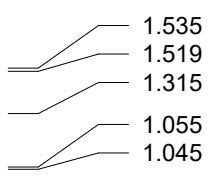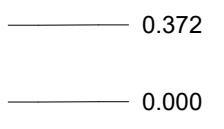

# TIPSO(CH<sub>2</sub>)<sub>6</sub>ODMPS

**3afc**

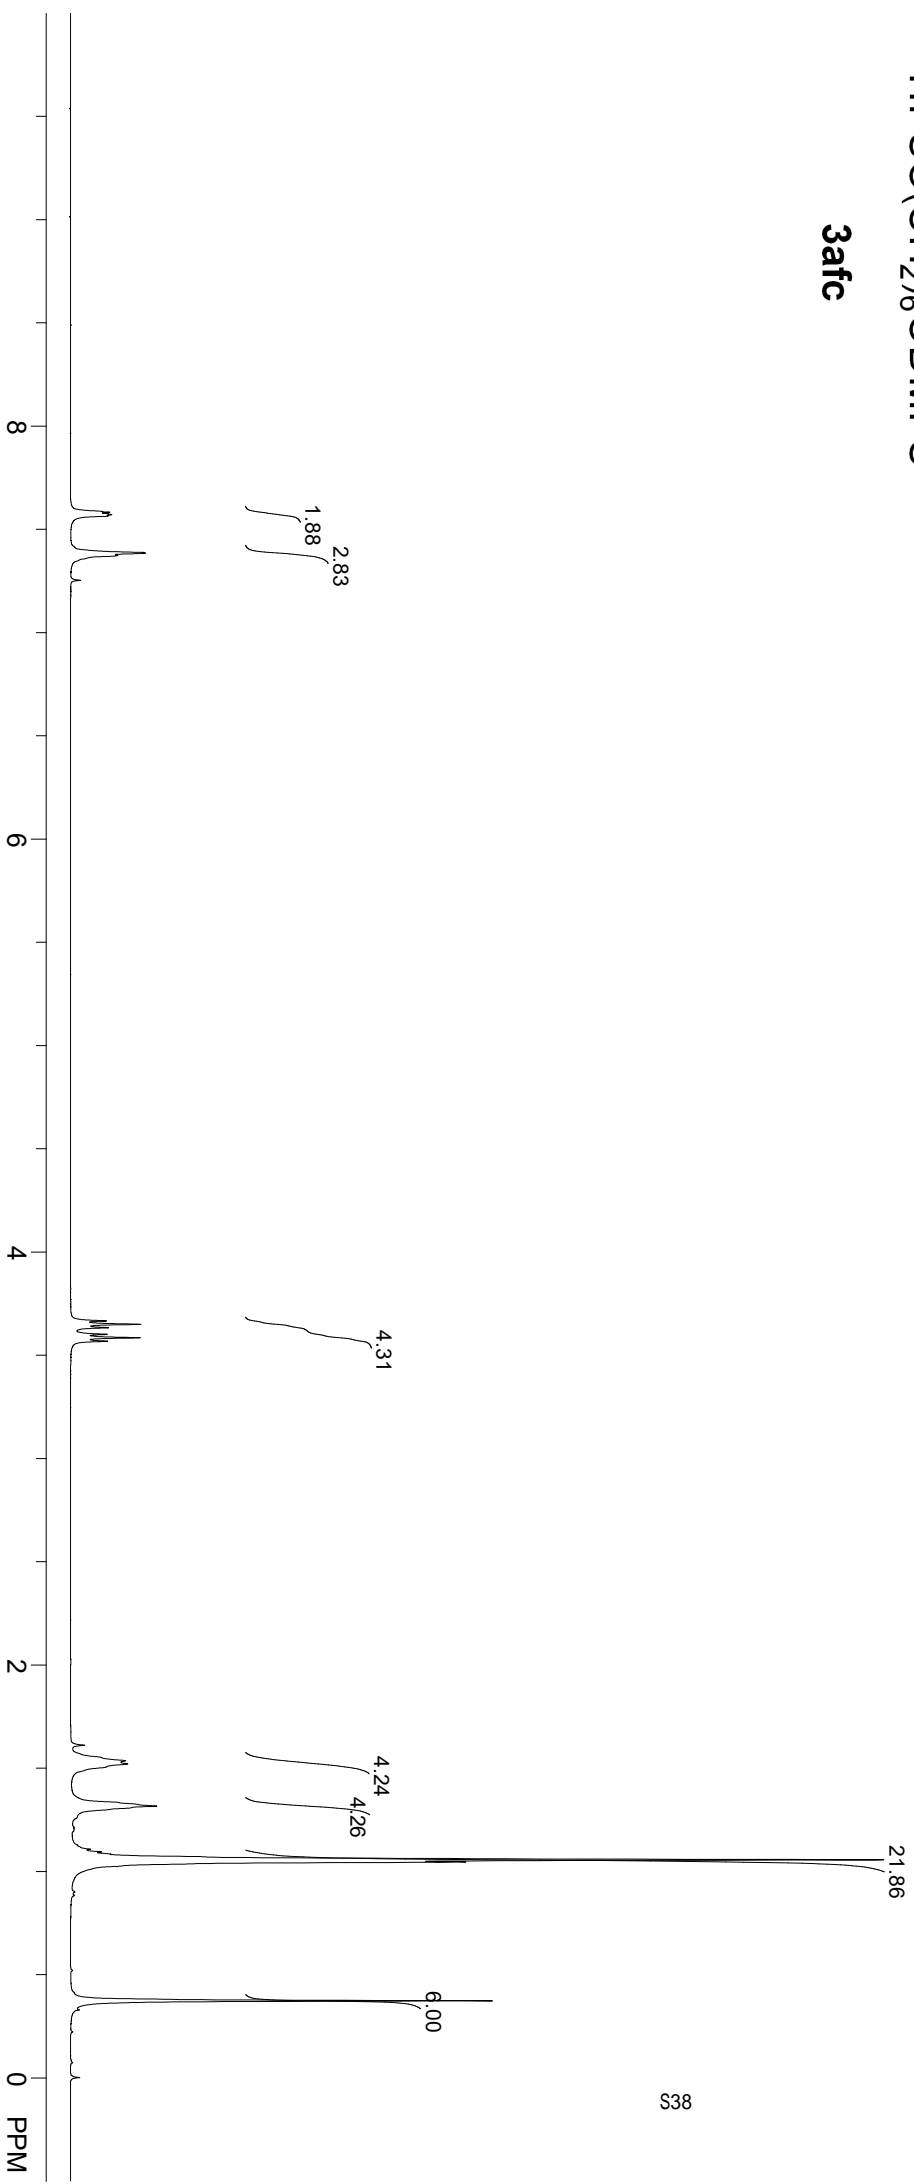

lzz-2-016-C  
Feb 9 2022  
Scans = 156  
Solvent = cdcl3  
SF1 = 100.519485 MHz  
SF2 = 399.717072 MHz

# TIPSO(CH<sub>2</sub>)<sub>6</sub>ODMPS

3afc

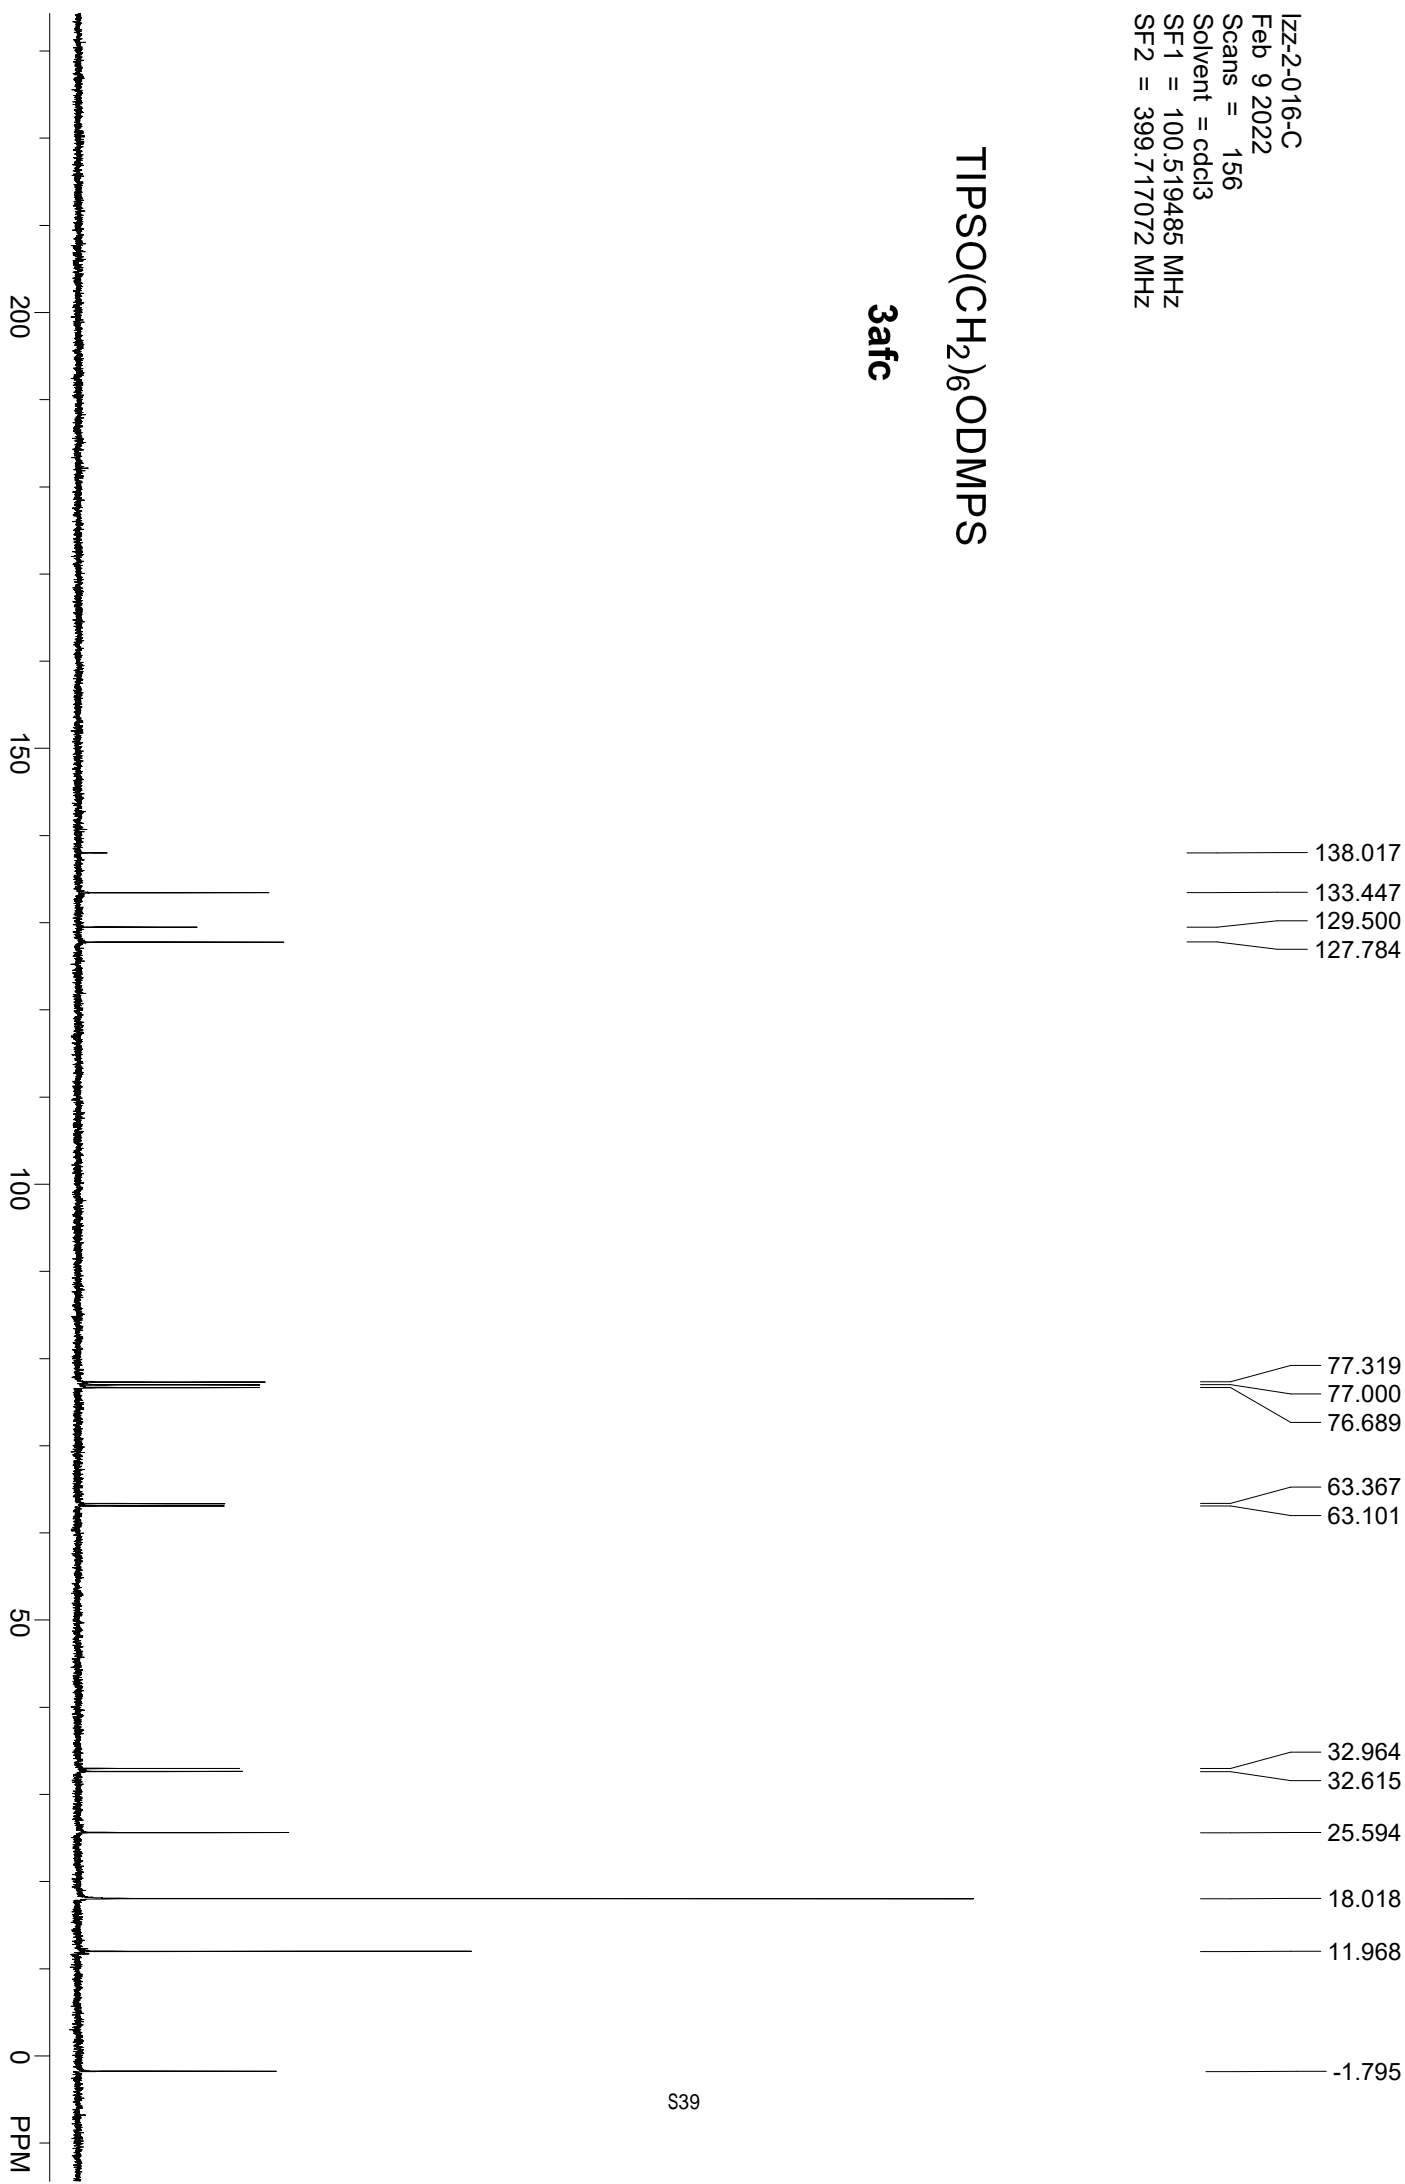

lzz-2-019-H  
Feb 11 2022  
Scans = 4  
Solvent = CDCl3  
SF1 = 399.717651 MHz  
SF2 = 100.517960 MHz

7.581  
7.569  
7.381  
7.368

3.668  
3.652  
3.636  
3.609  
3.593  
3.576

1.587  
1.569  
1.551  
1.541  
1.532  
1.525  
1.505  
1.488  
1.405  
1.384  
1.367  
1.347  
1.330  
1.105  
1.092  
1.055  
1.045  
0.370  
-0.000

TIPSO(CH<sub>2</sub>)<sub>5</sub>ODMPS

**3bfc**

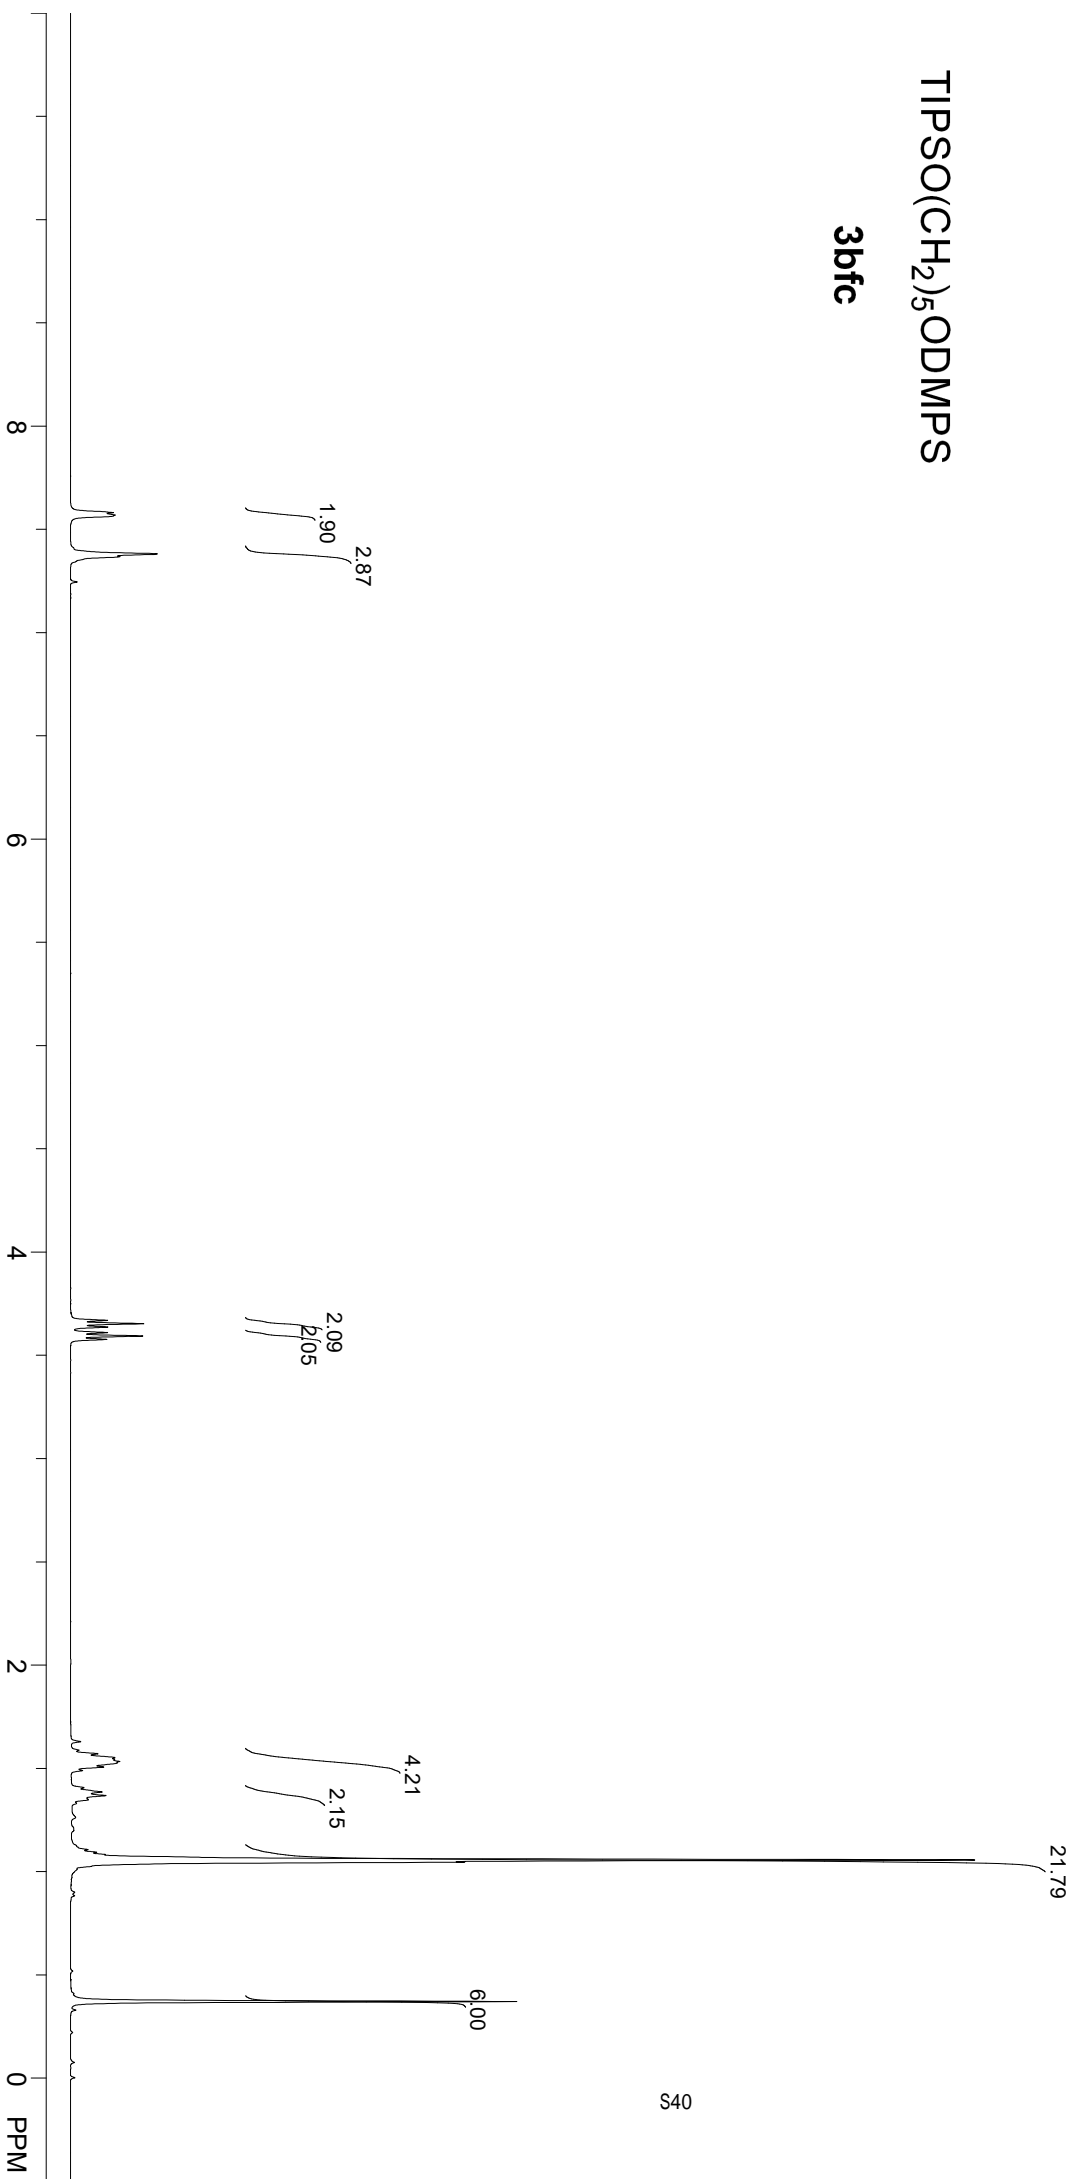



lzz-2-019-C  
Feb 12 2022  
Scans = 88  
Solvent = cdcl3  
SF1 = 100.598389 MHz  
SF2 = 400.030792 MHz

TIPSO(CH<sub>2</sub>)<sub>5</sub>ODMPS

**3bfc**

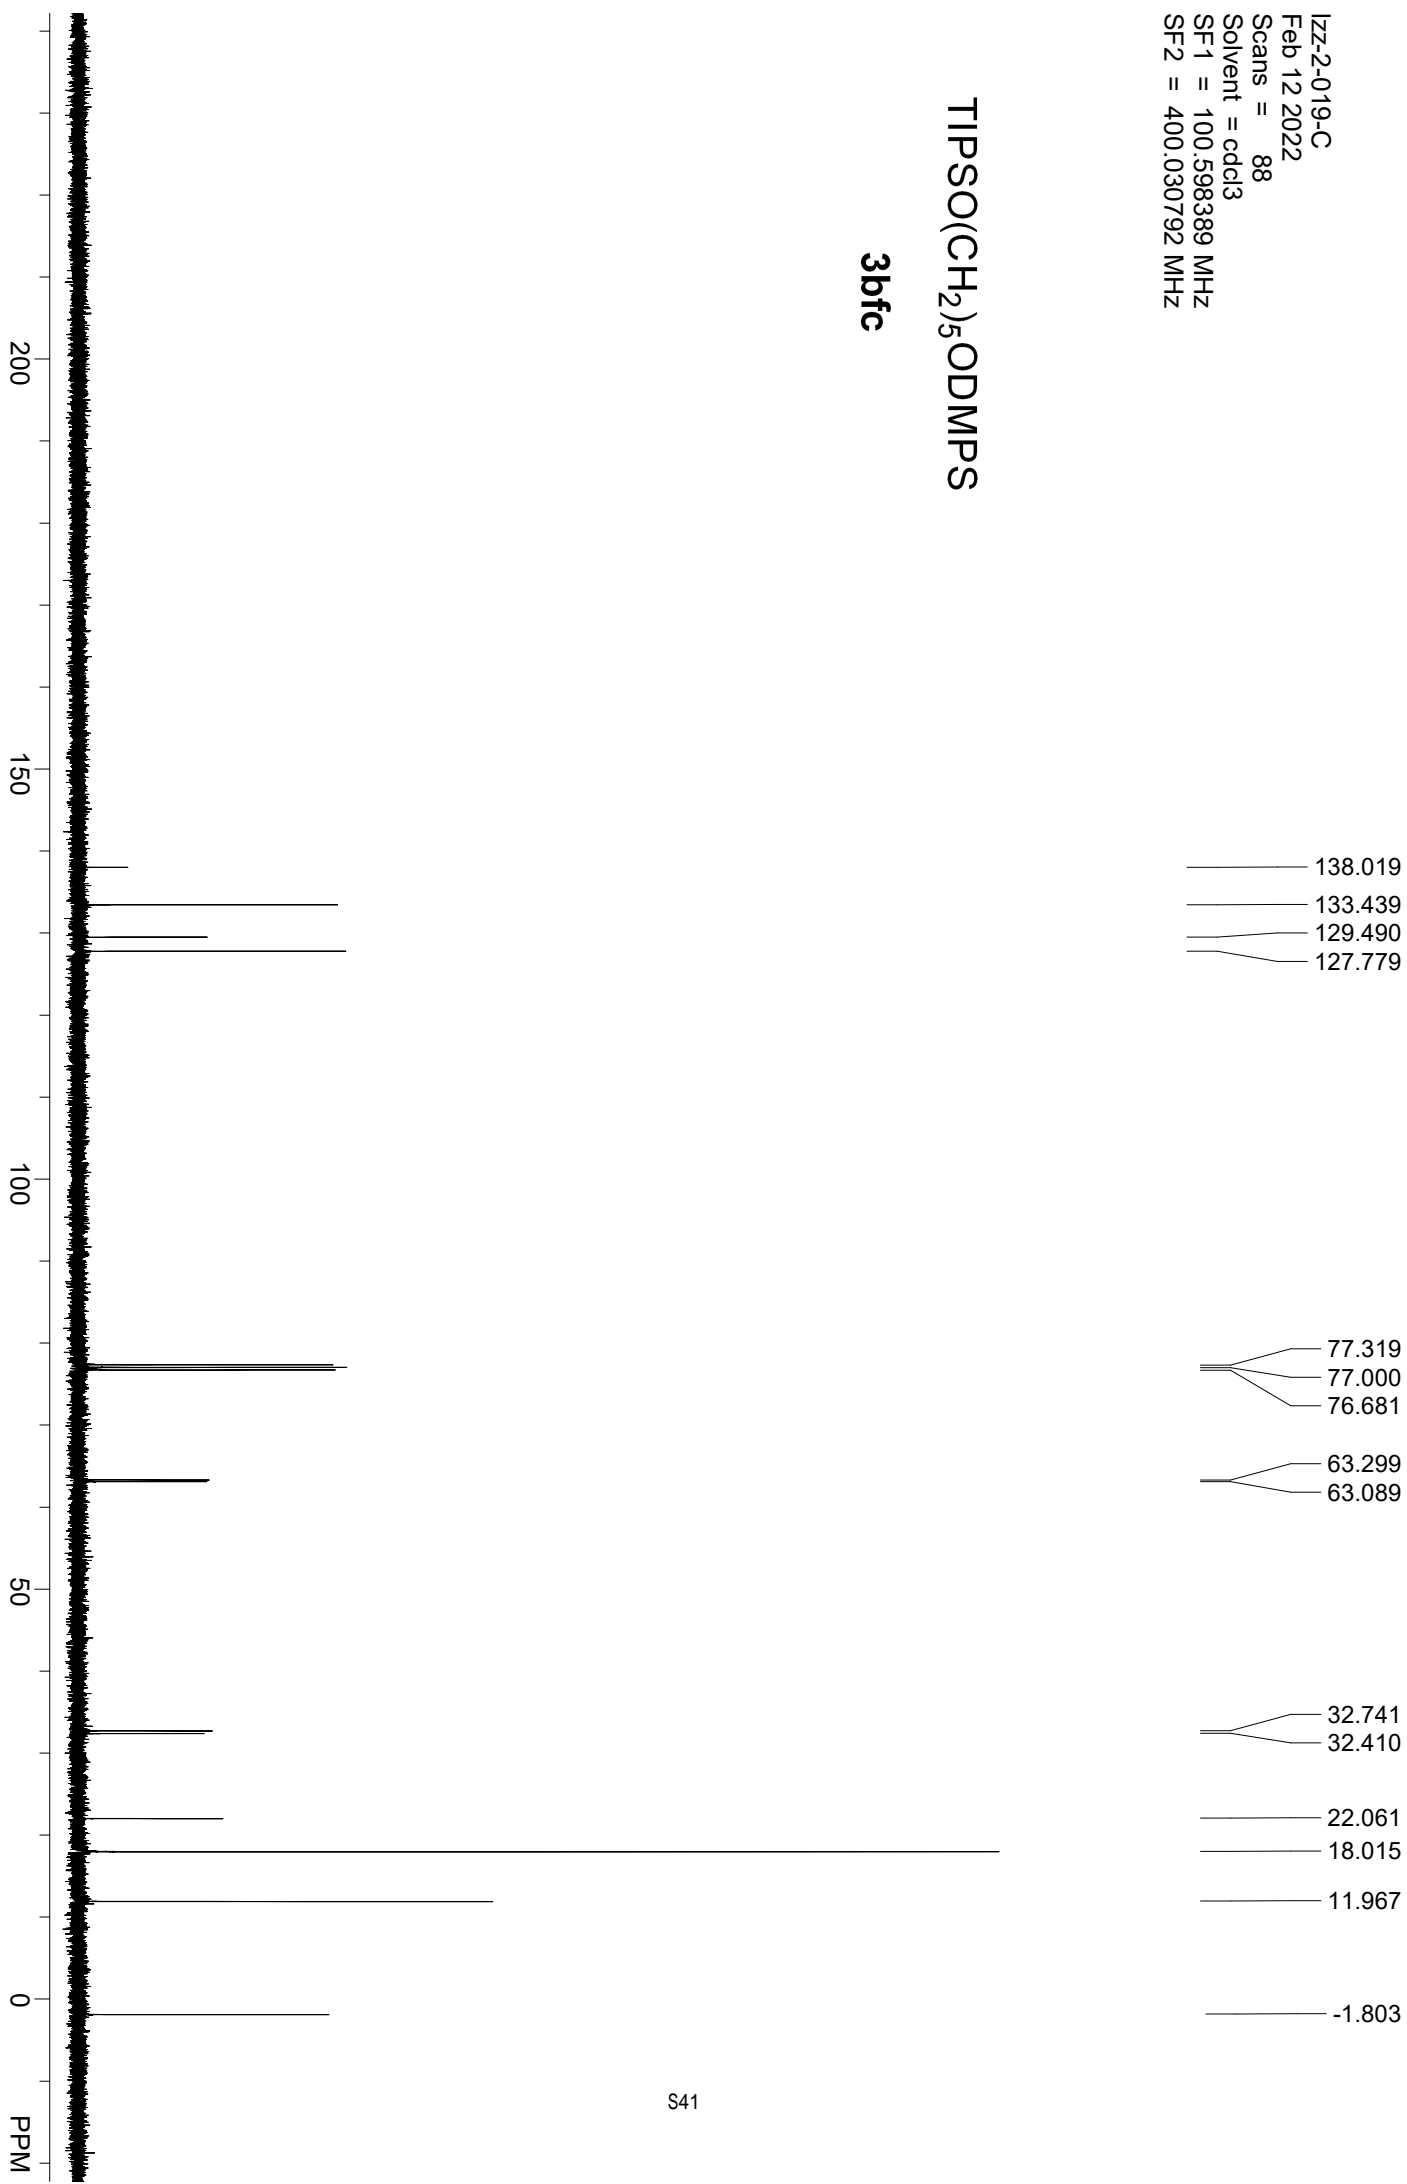

Izz-2-113-H  
Jun 24 2022  
Scans = 4  
Solvent = CDCl3  
SF1 = 399.717865 MHz  
SF2 = 100.517960 MHz

10.713

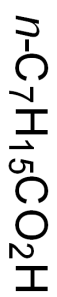

**2a**

from **1aa** with TEMPO as co-catalyst

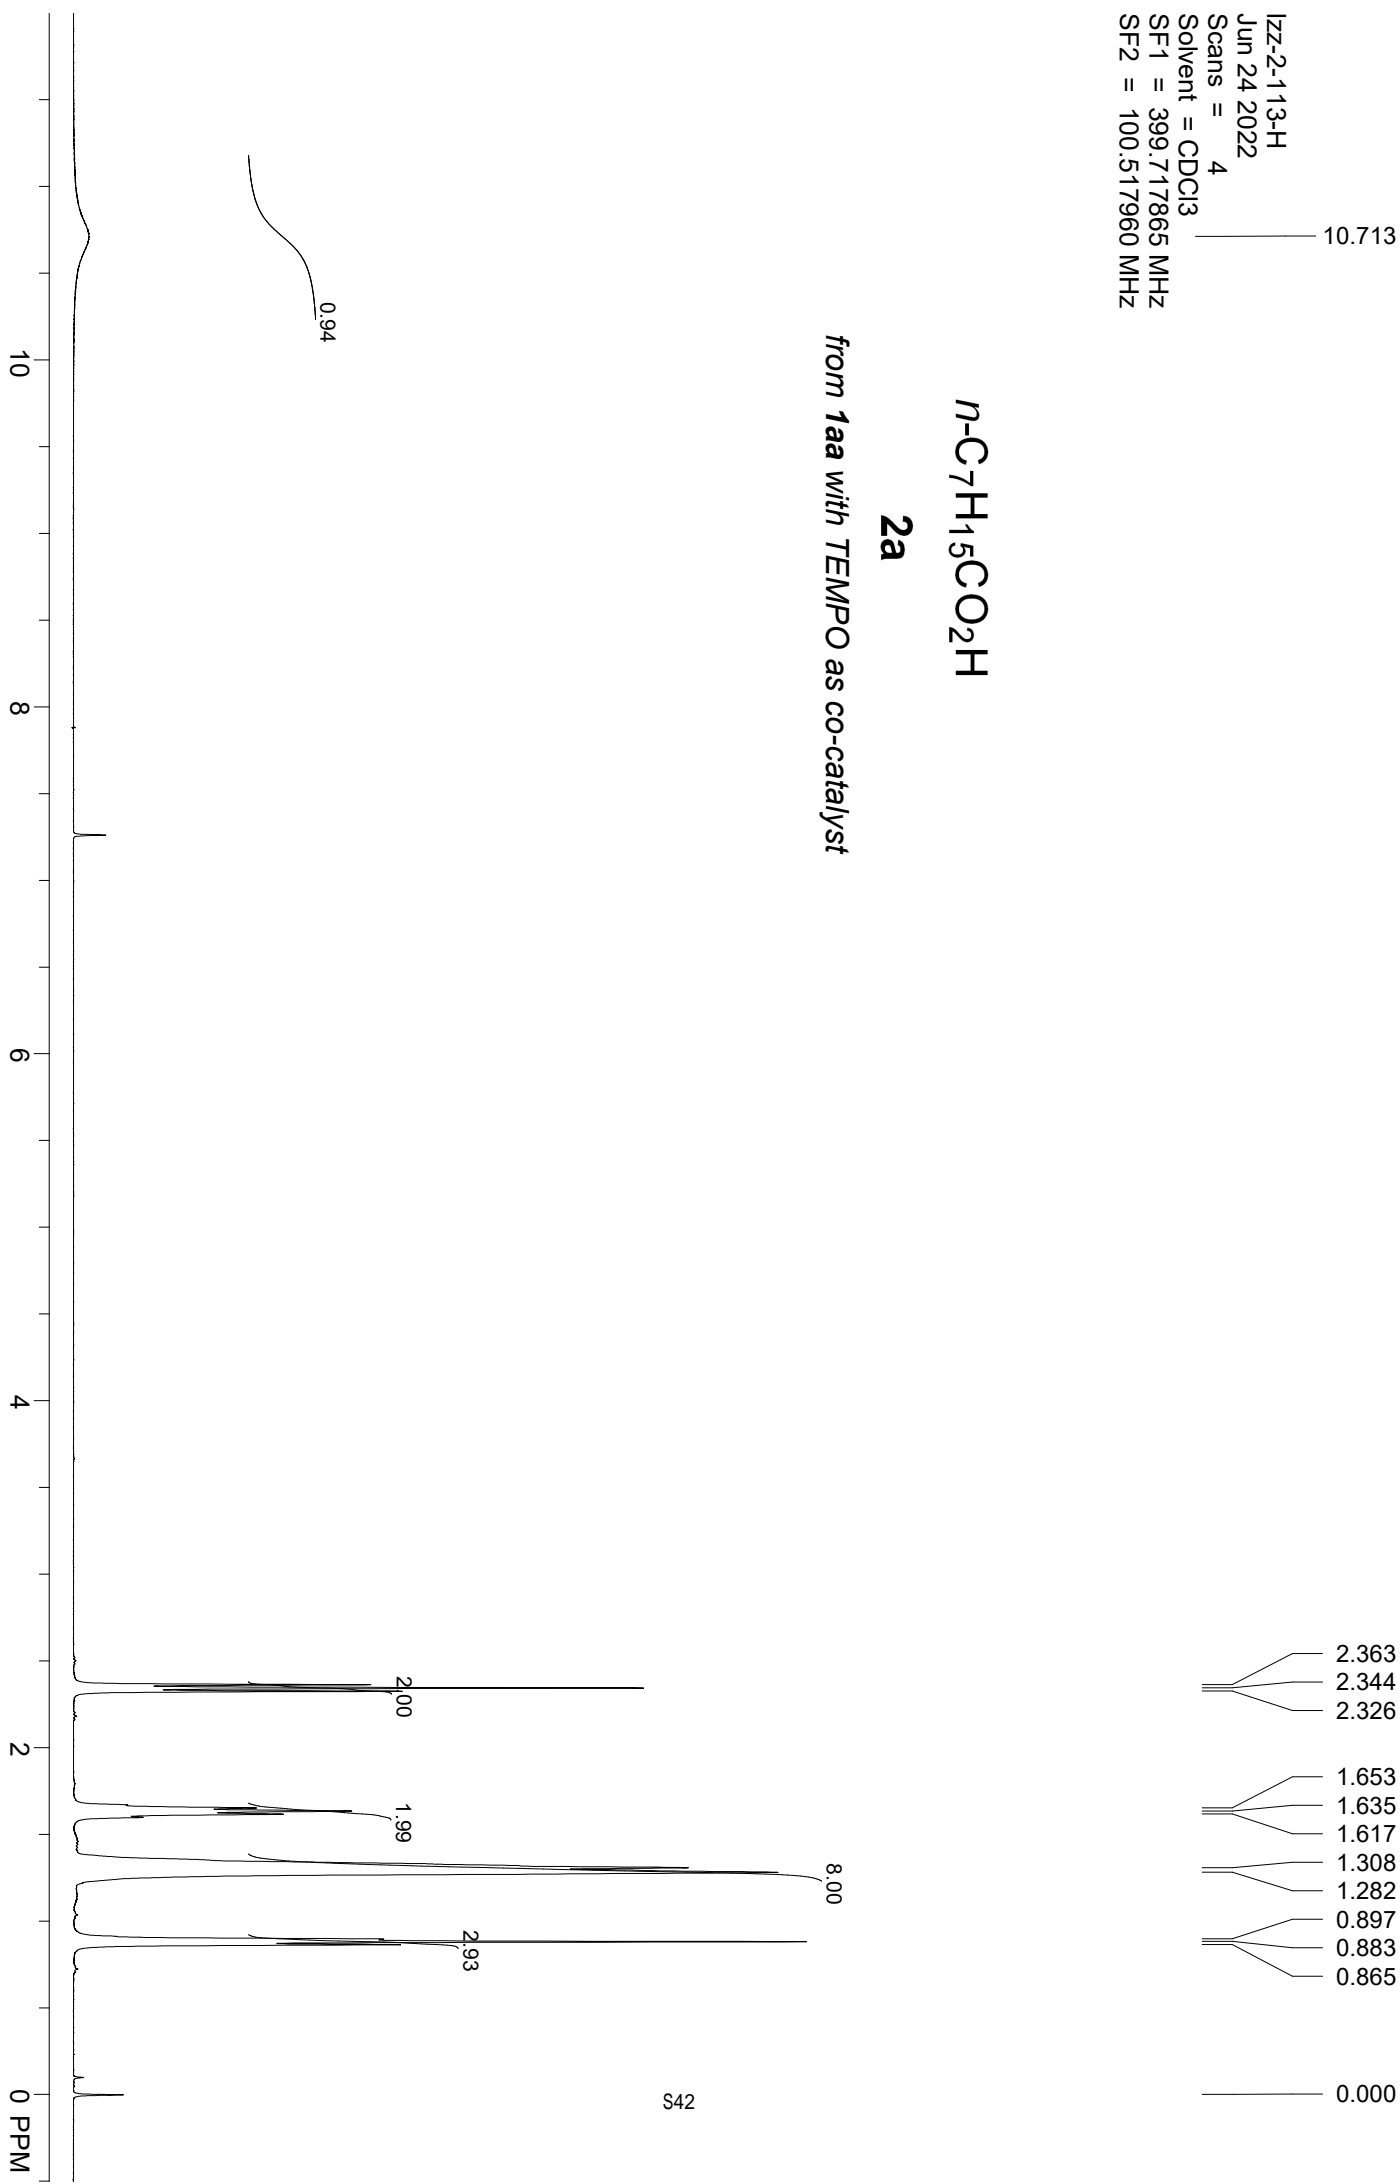

lzz-2-113-C  
Jun 24 2022  
Scans = 92  
Solvent = cdcl3  
SF1 = 100.519485 MHz  
SF2 = 399.717072 MHz

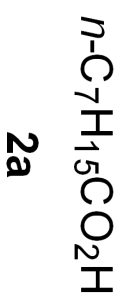

from 1aa with TEMPO as co-catalyst

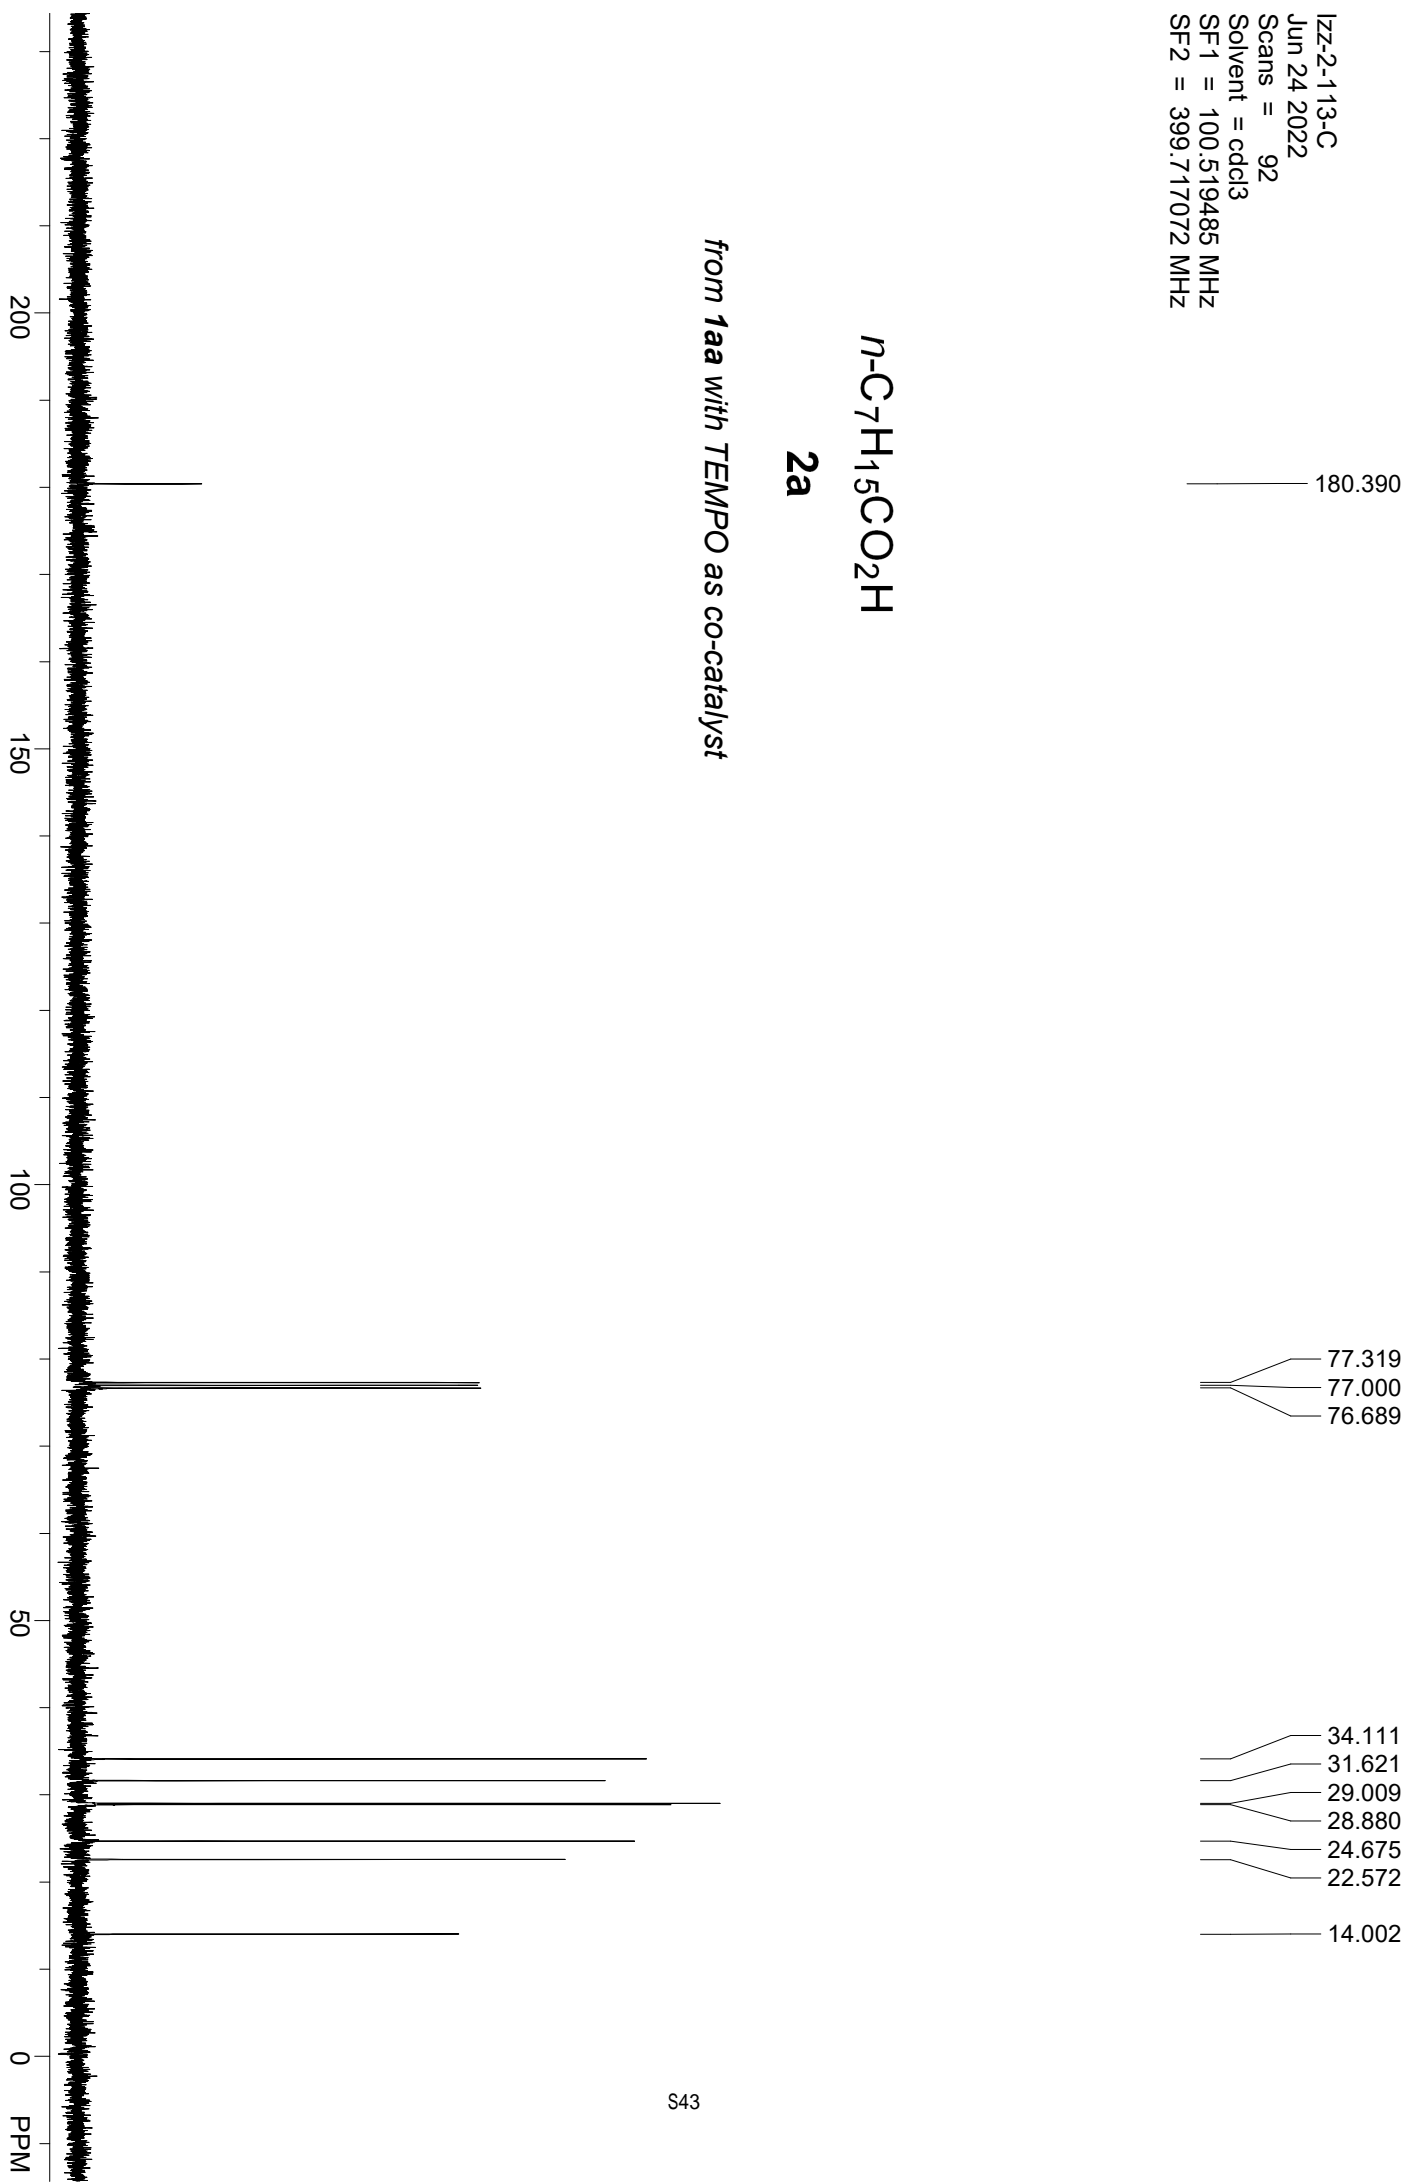

lzz-2-115-H  
Jun 27 2022  
Scans = 8  
Solvent = CDCl3  
SF1 = 399.717865 MHz  
SF2 = 100.517960 MHz

11.336

2.365  
2.346  
2.328  
1.652  
1.635  
1.616  
1.308  
1.281  
0.897  
0.883  
0.865  
0.000

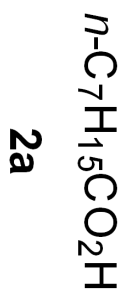

from **1aa** with 4-OH-TEMPO as co-catalyst

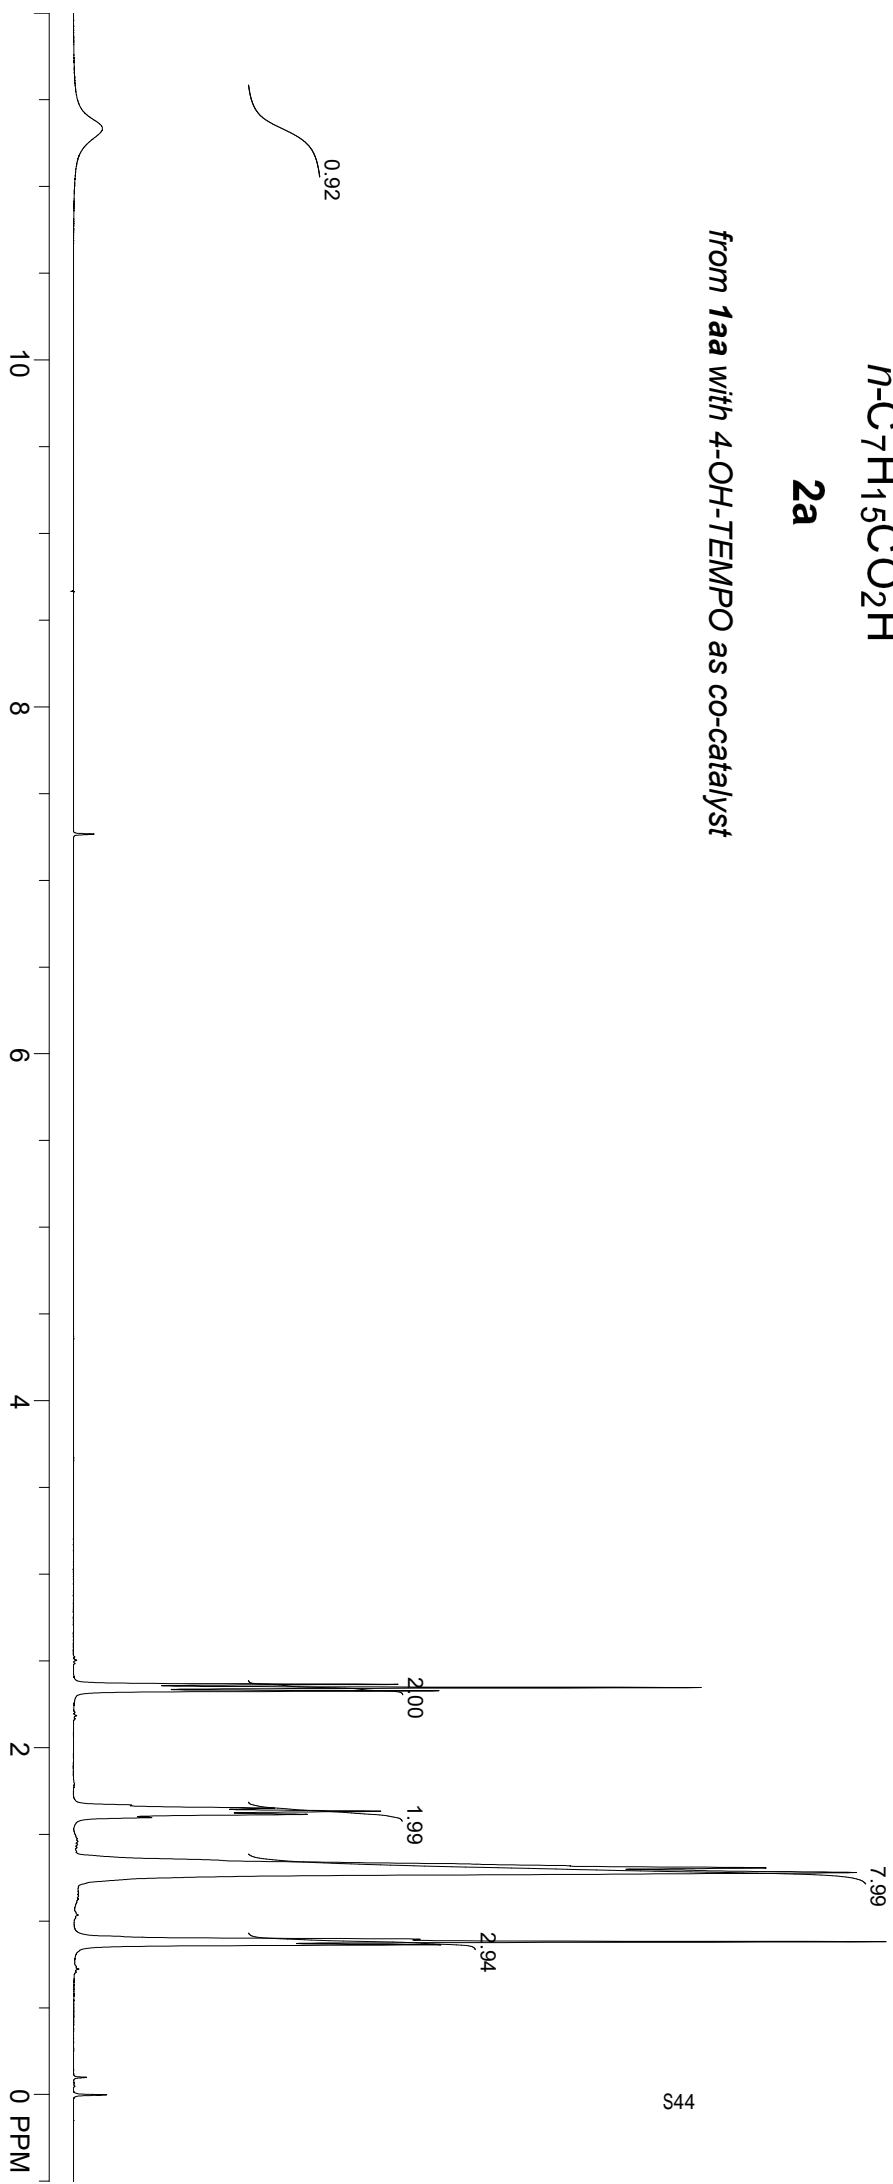

lzz-2-115-C  
Jun 27 2022  
Scans = 92  
Solvent = cdcl3  
SF1 = 100.519485 MHz  
SF2 = 399.717072 MHz

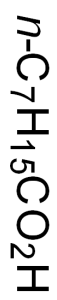

**2a**

from **1aa** with 4-OH-TEMPO as co-catalyst

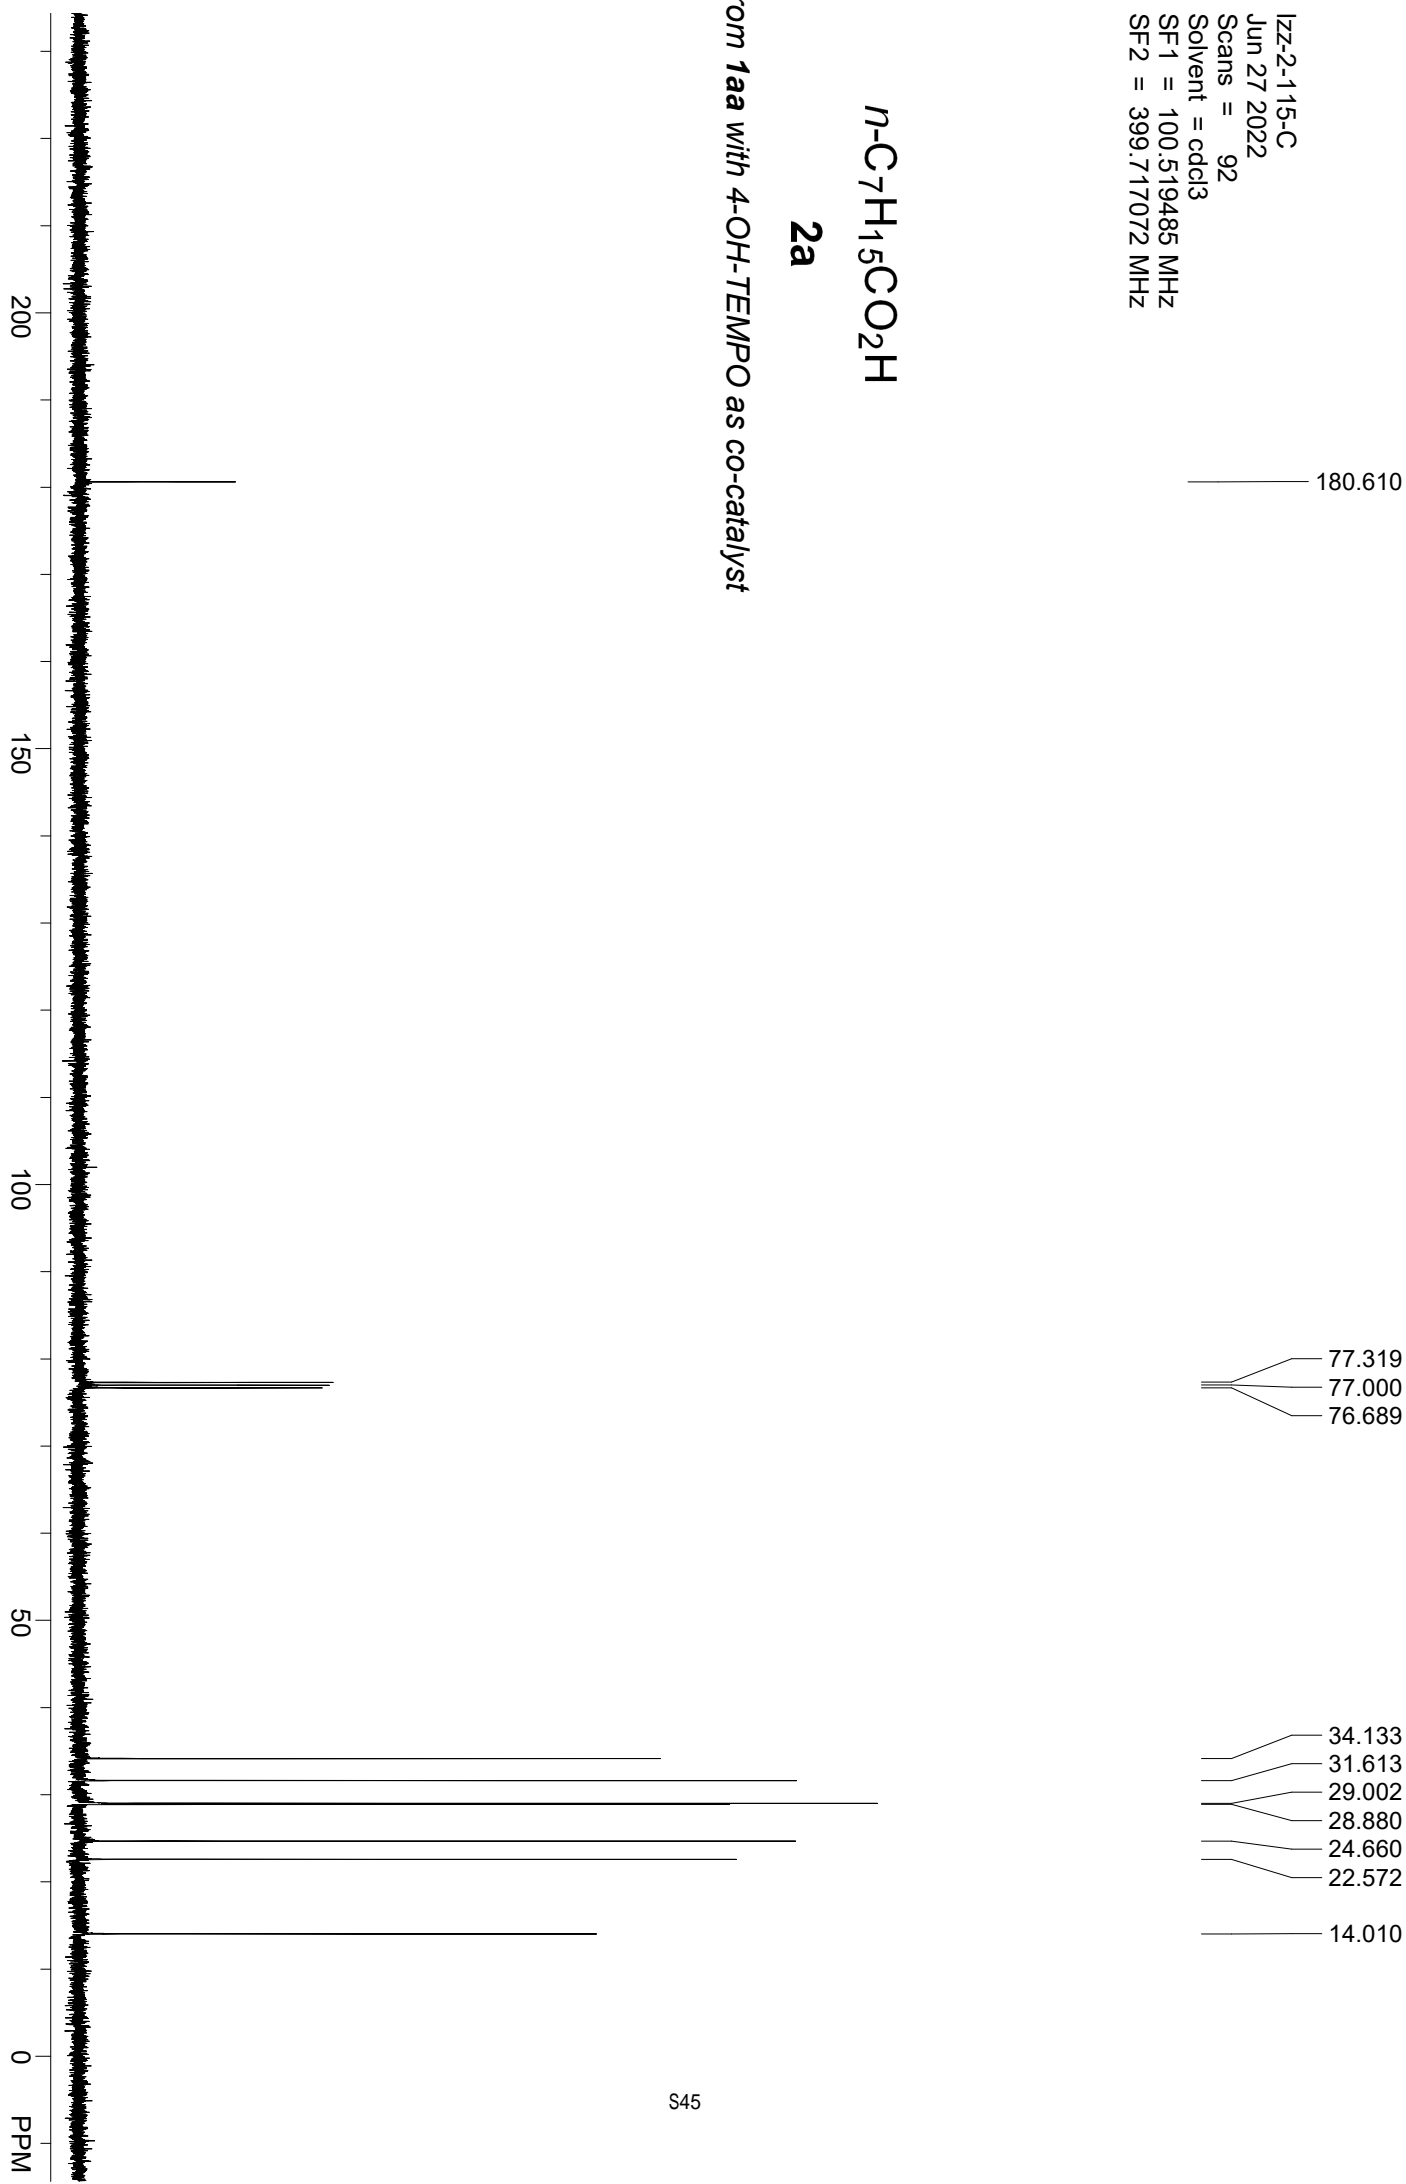

lzz-1-47-H  
2020-05-07 19:11:44.625  
Scans = 8  
Solvent = CDCl3  
SF1 = 300.130005 MHz  
SF2 = 1.000000 MHz

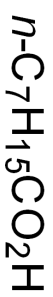

**2a**

from **1ab** with 4-OH-TEMPO as co-catalyst

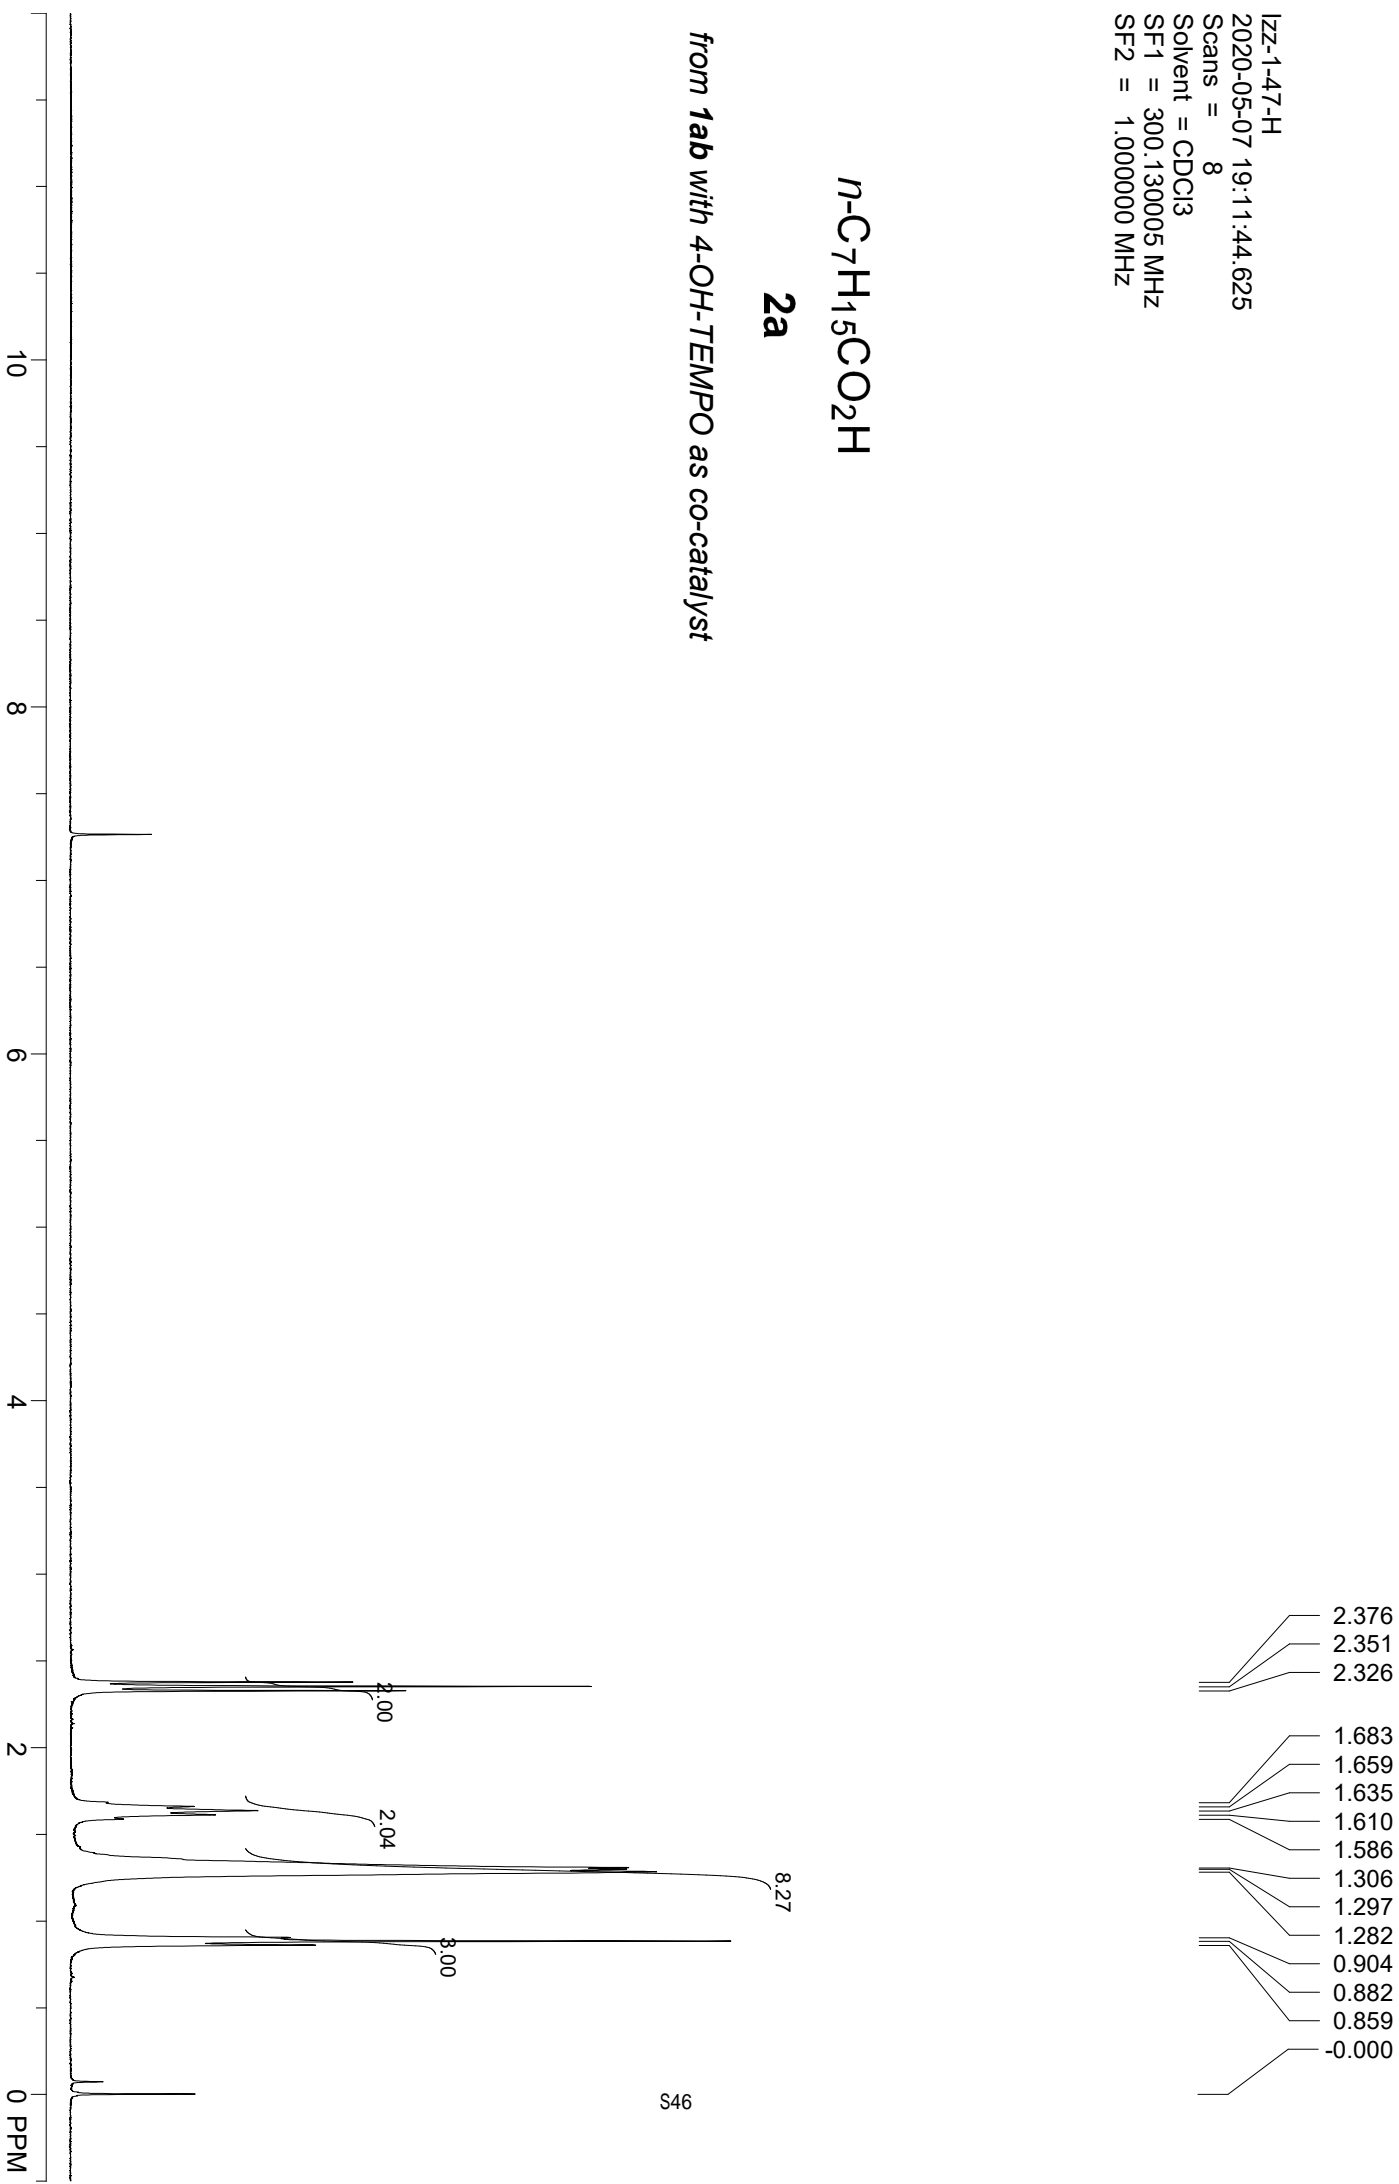

lzz-1-47-C  
2020-05-07 21:34:49.390  
Scans = 101  
Solvent = CDCl3  
SF1 = 75.467751 MHz  
SF2 = 1.000000 MHz

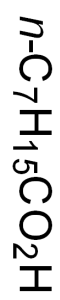

**2a**

from **1ab** with 4-OH-TEMPO as co-catalyst

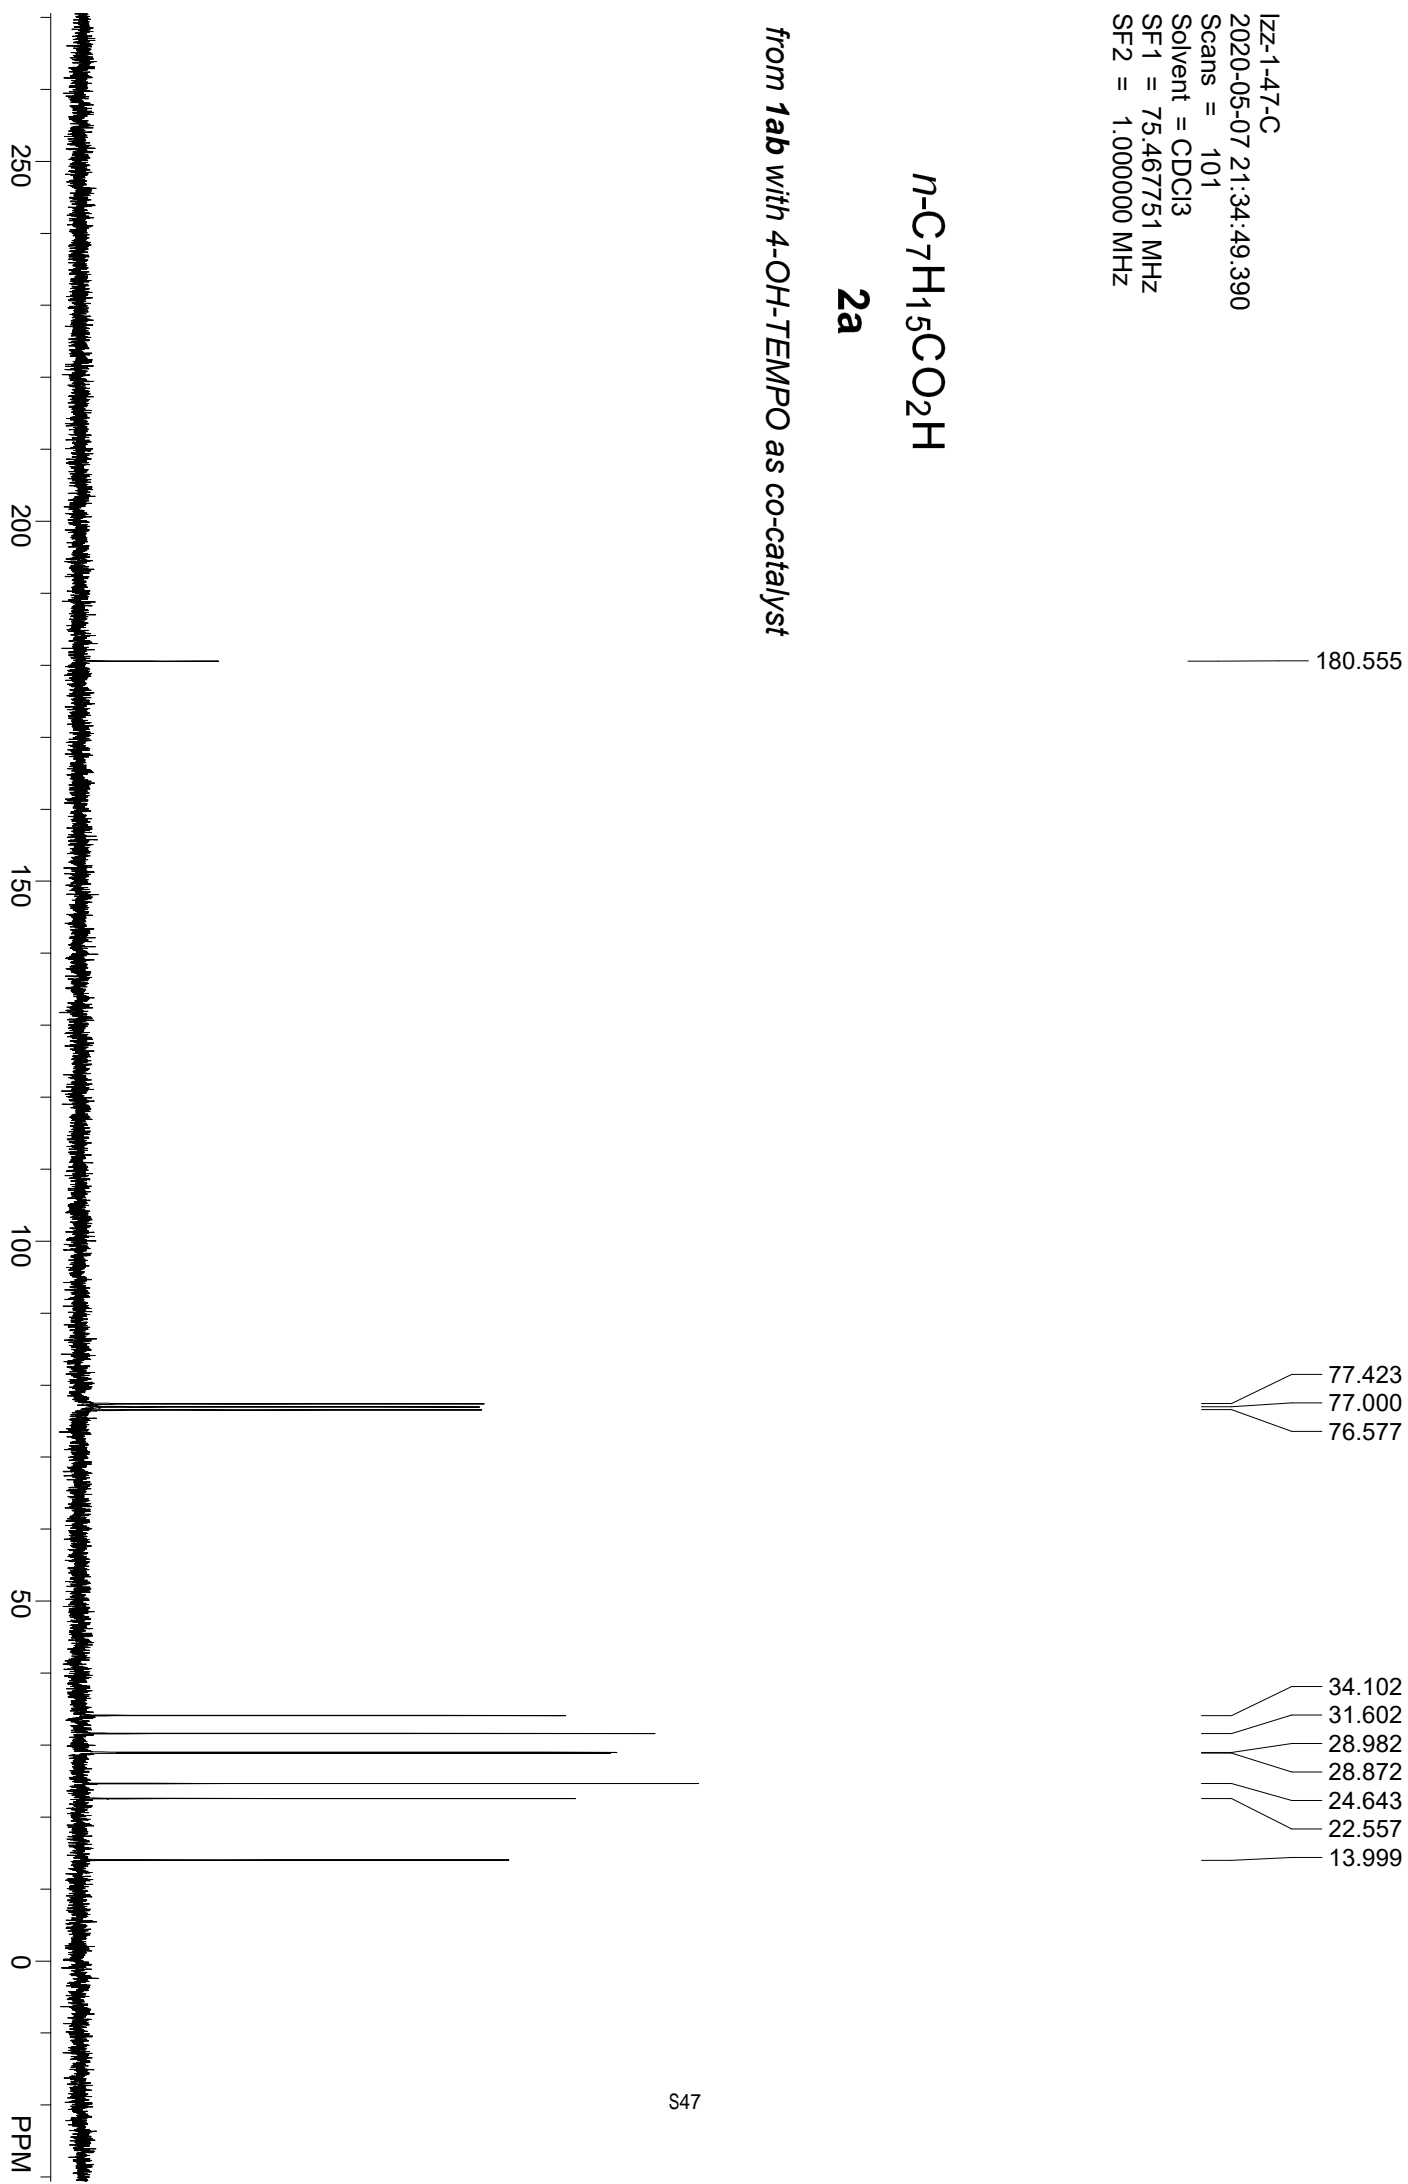

lzz-1-41-H  
2020-01-12 14:15:52.593  
Scans = 8  
Solvent = CDCl3  
SF1 = 300.130005 MHz  
SF2 = 1.000000 MHz

11.574

*n*-C<sub>7</sub>H<sub>15</sub>CO<sub>2</sub>H

**2a**

from **1ac** with 4-OH-TEMPO as co-catalyst

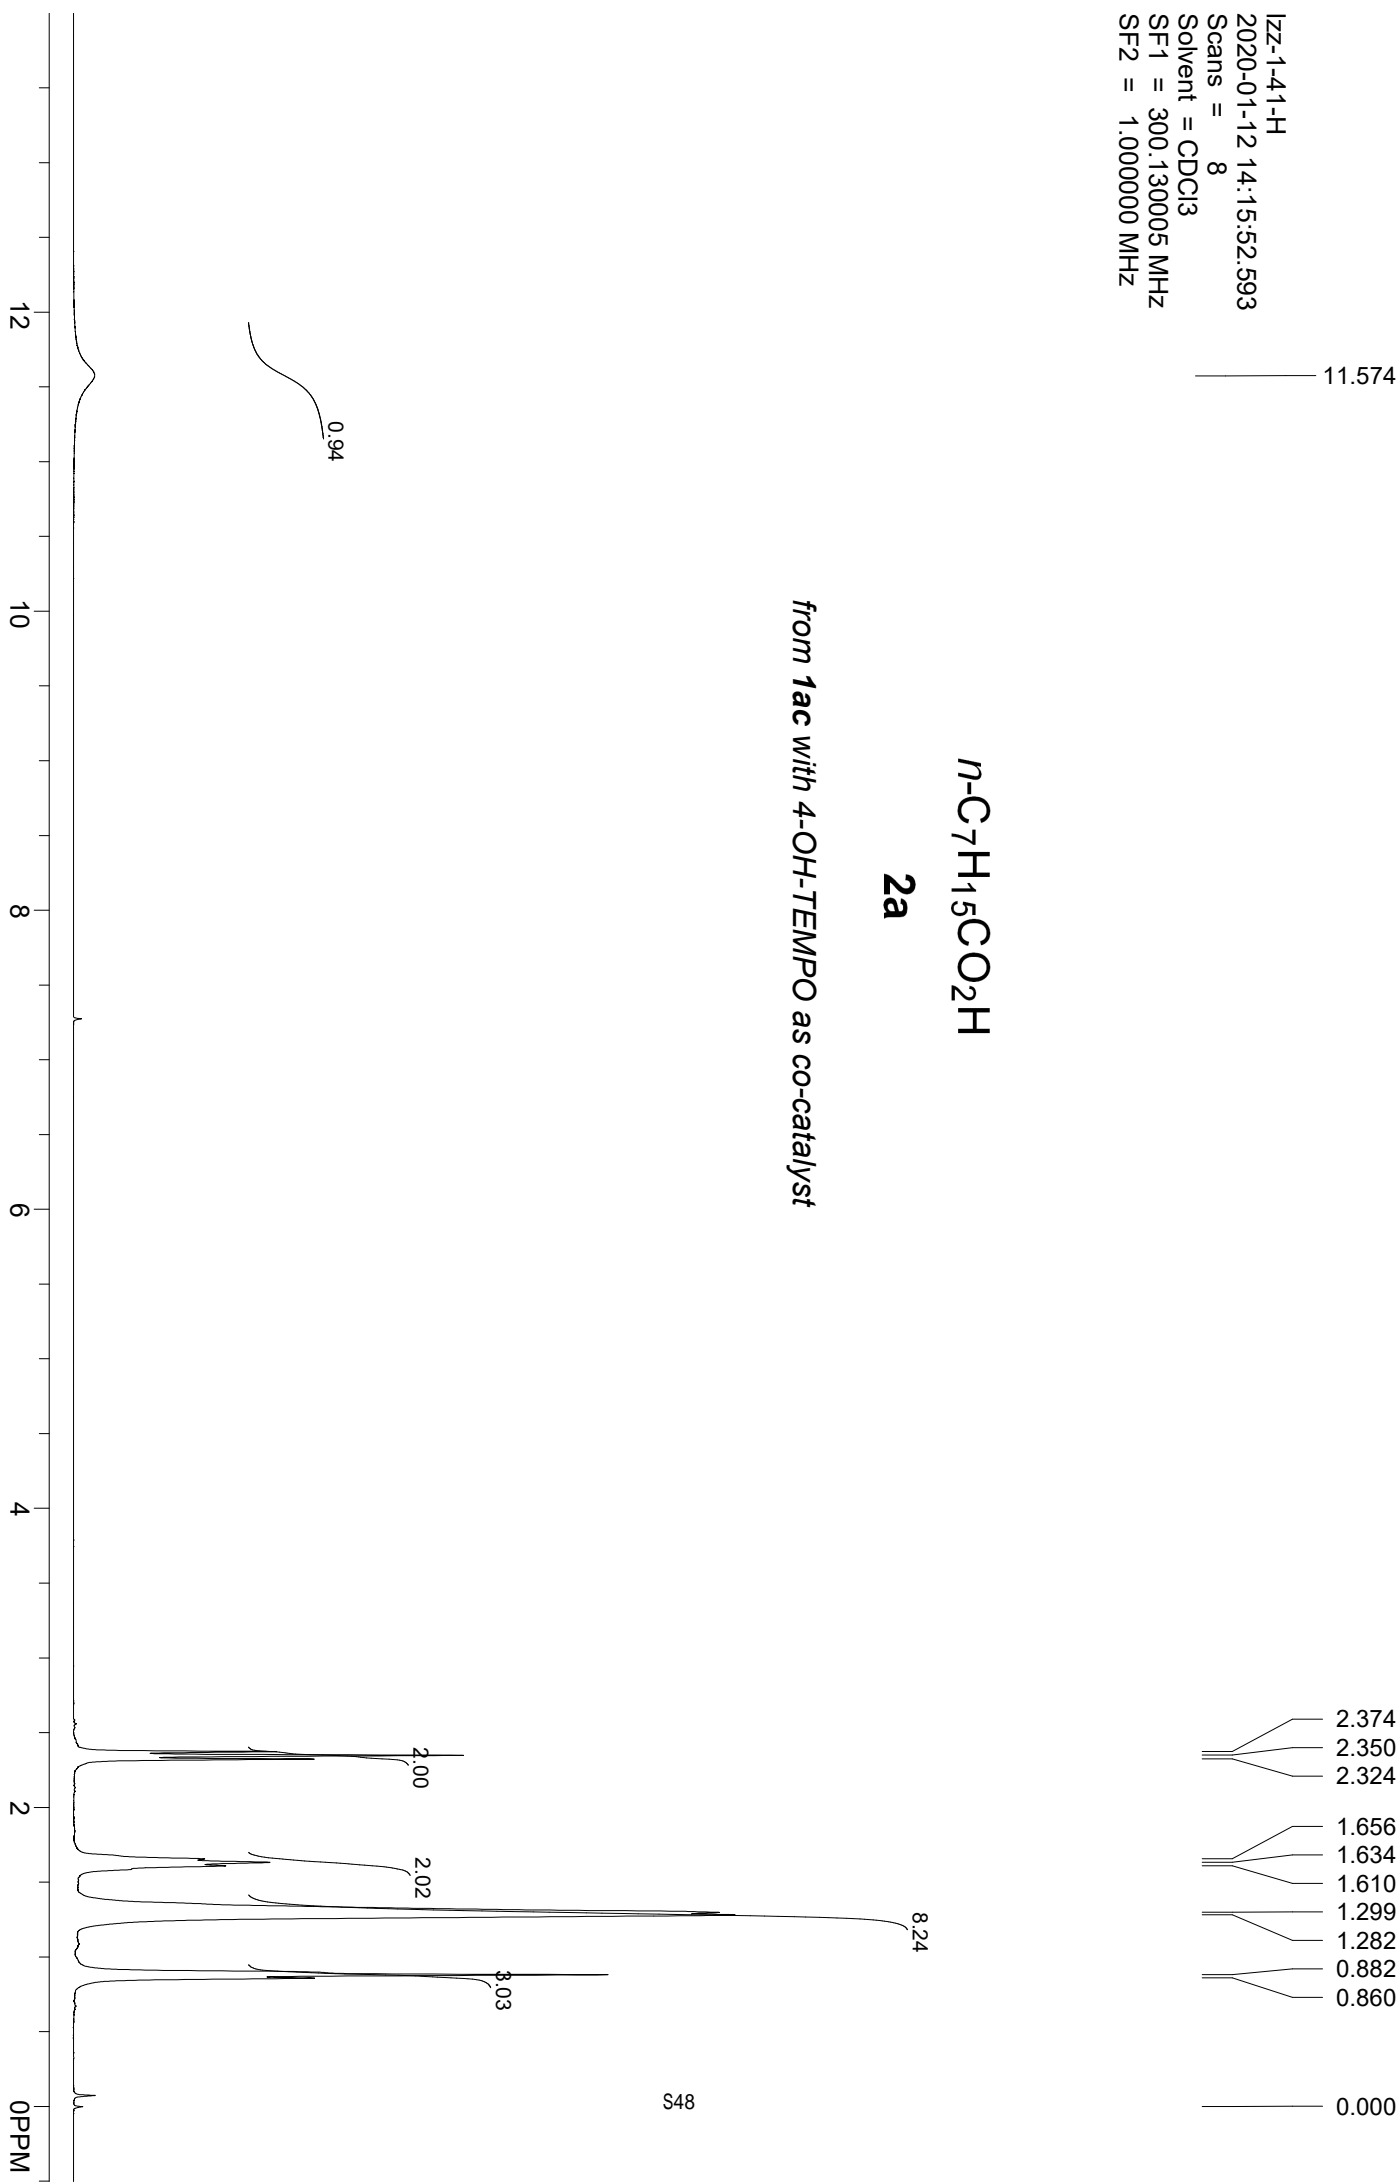



lzz-1-41-C  
2020-01-13 10:12:08.312  
Scans = 36  
Solvent = CDCl3  
SF1 = 75.467751 MHz  
SF2 = 1.000000 MHz

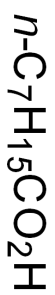

**2a**

from **1ac** with 4-OH-TEMPO as co-catalyst

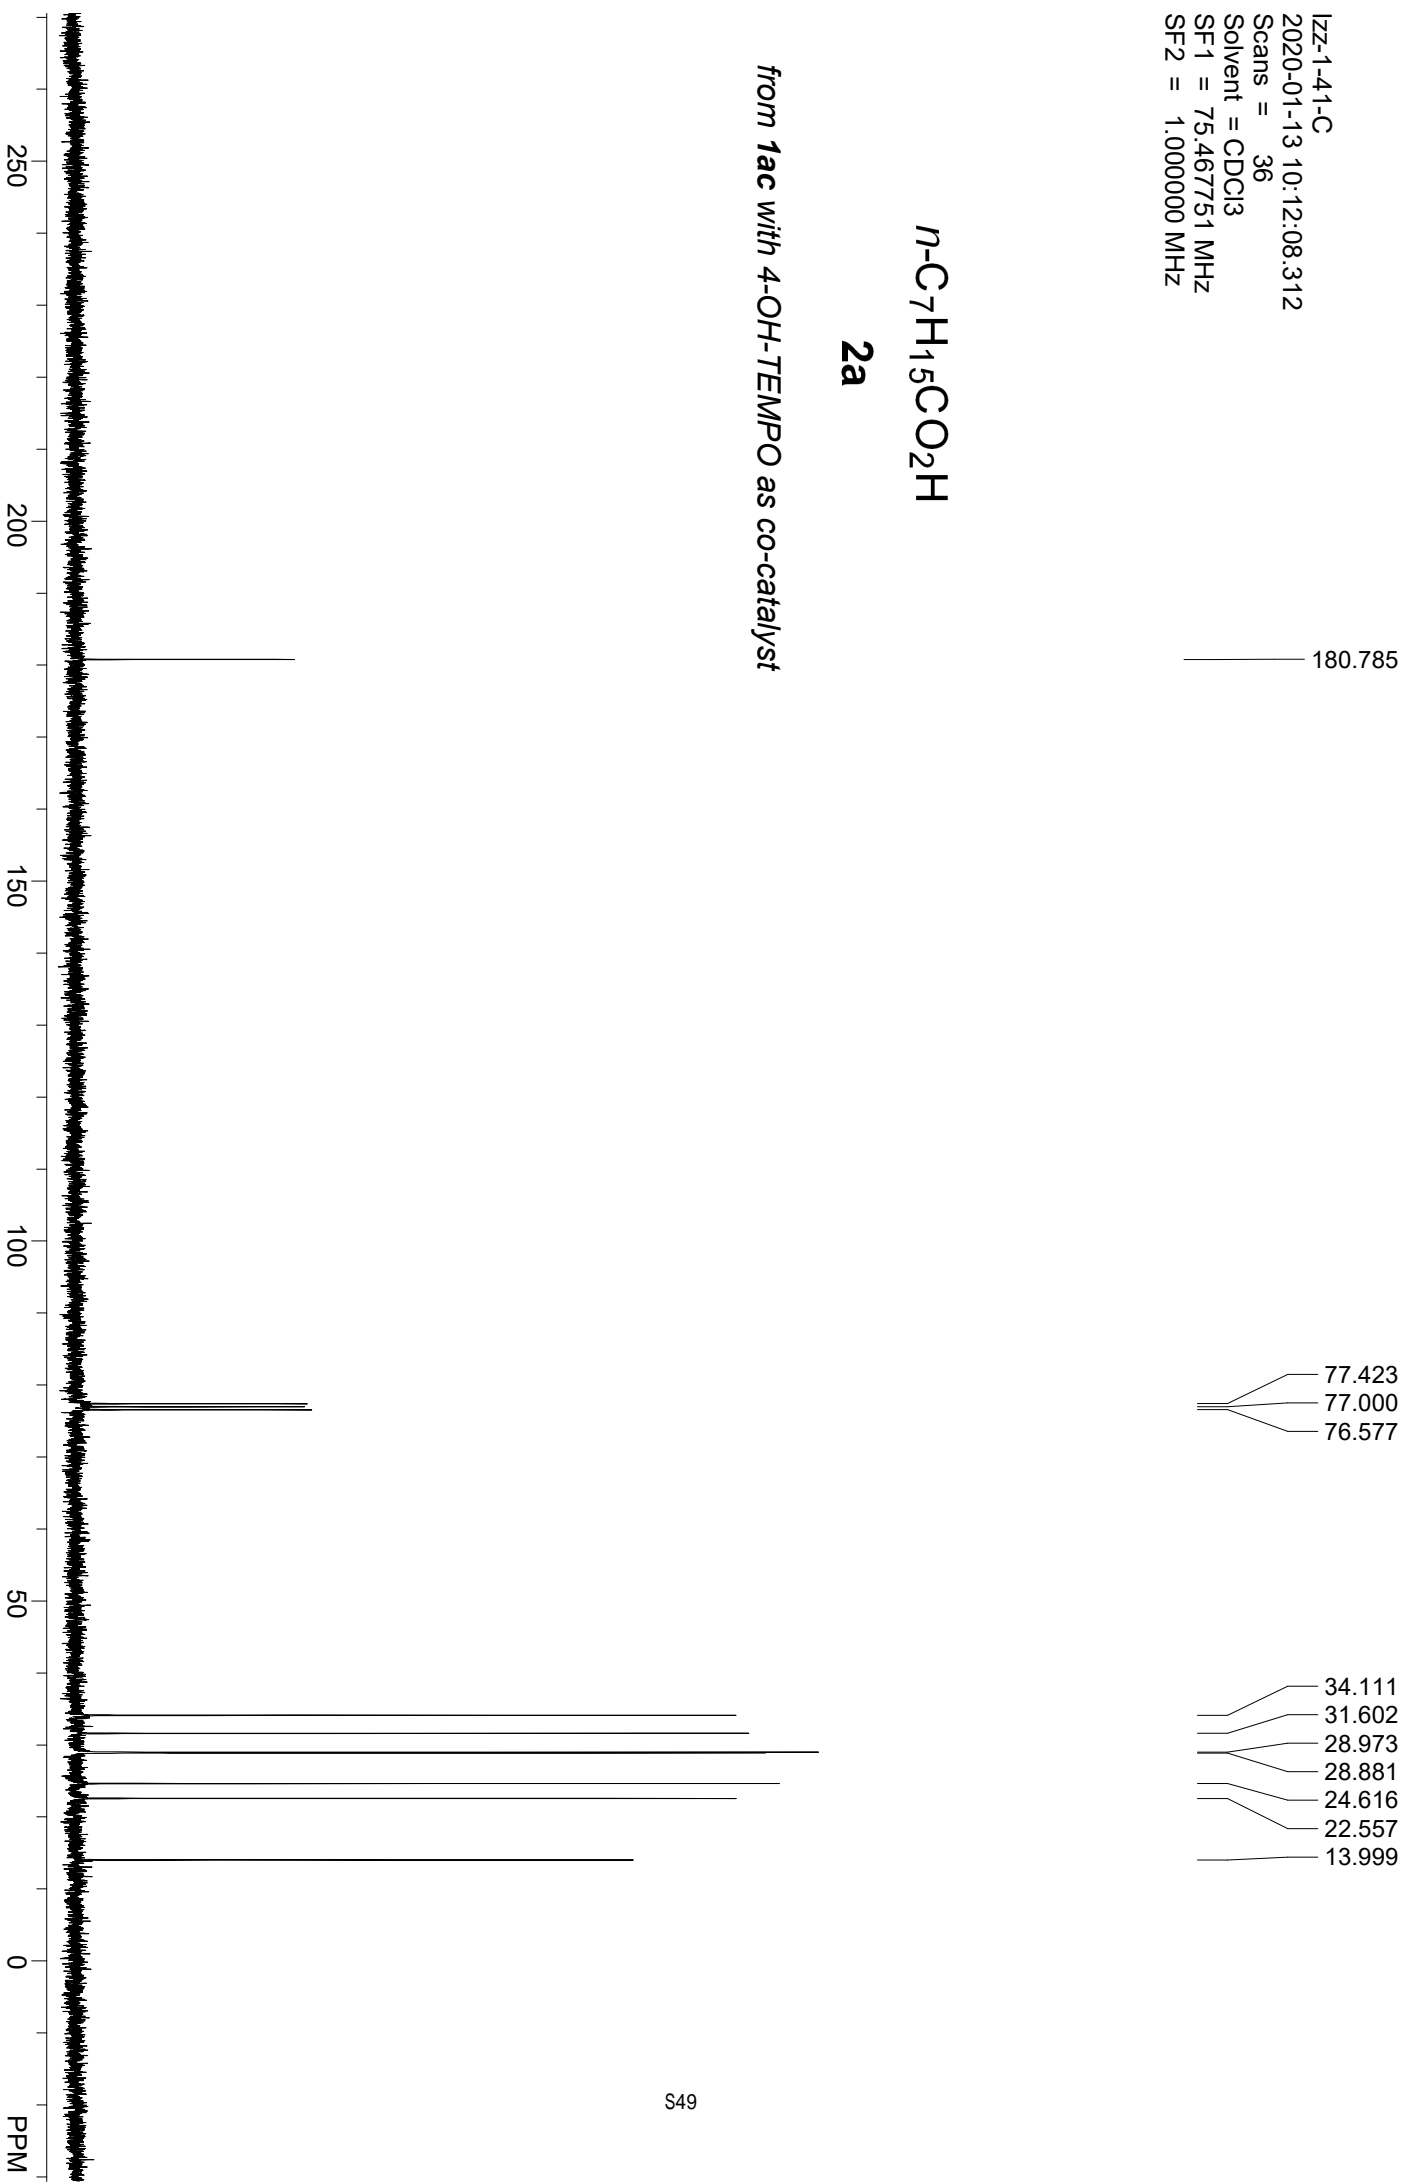

11.142

lzz-1-49-H  
2020-05-14 14:29:35.843  
Scans = 8  
Solvent = CDCl3  
SF1 = 300.130005 MHz  
SF2 = 1.000000 MHz

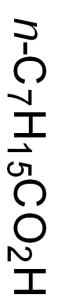

**2a**

*from 1ad with 4-OH-TEMPO as co-catalyst*

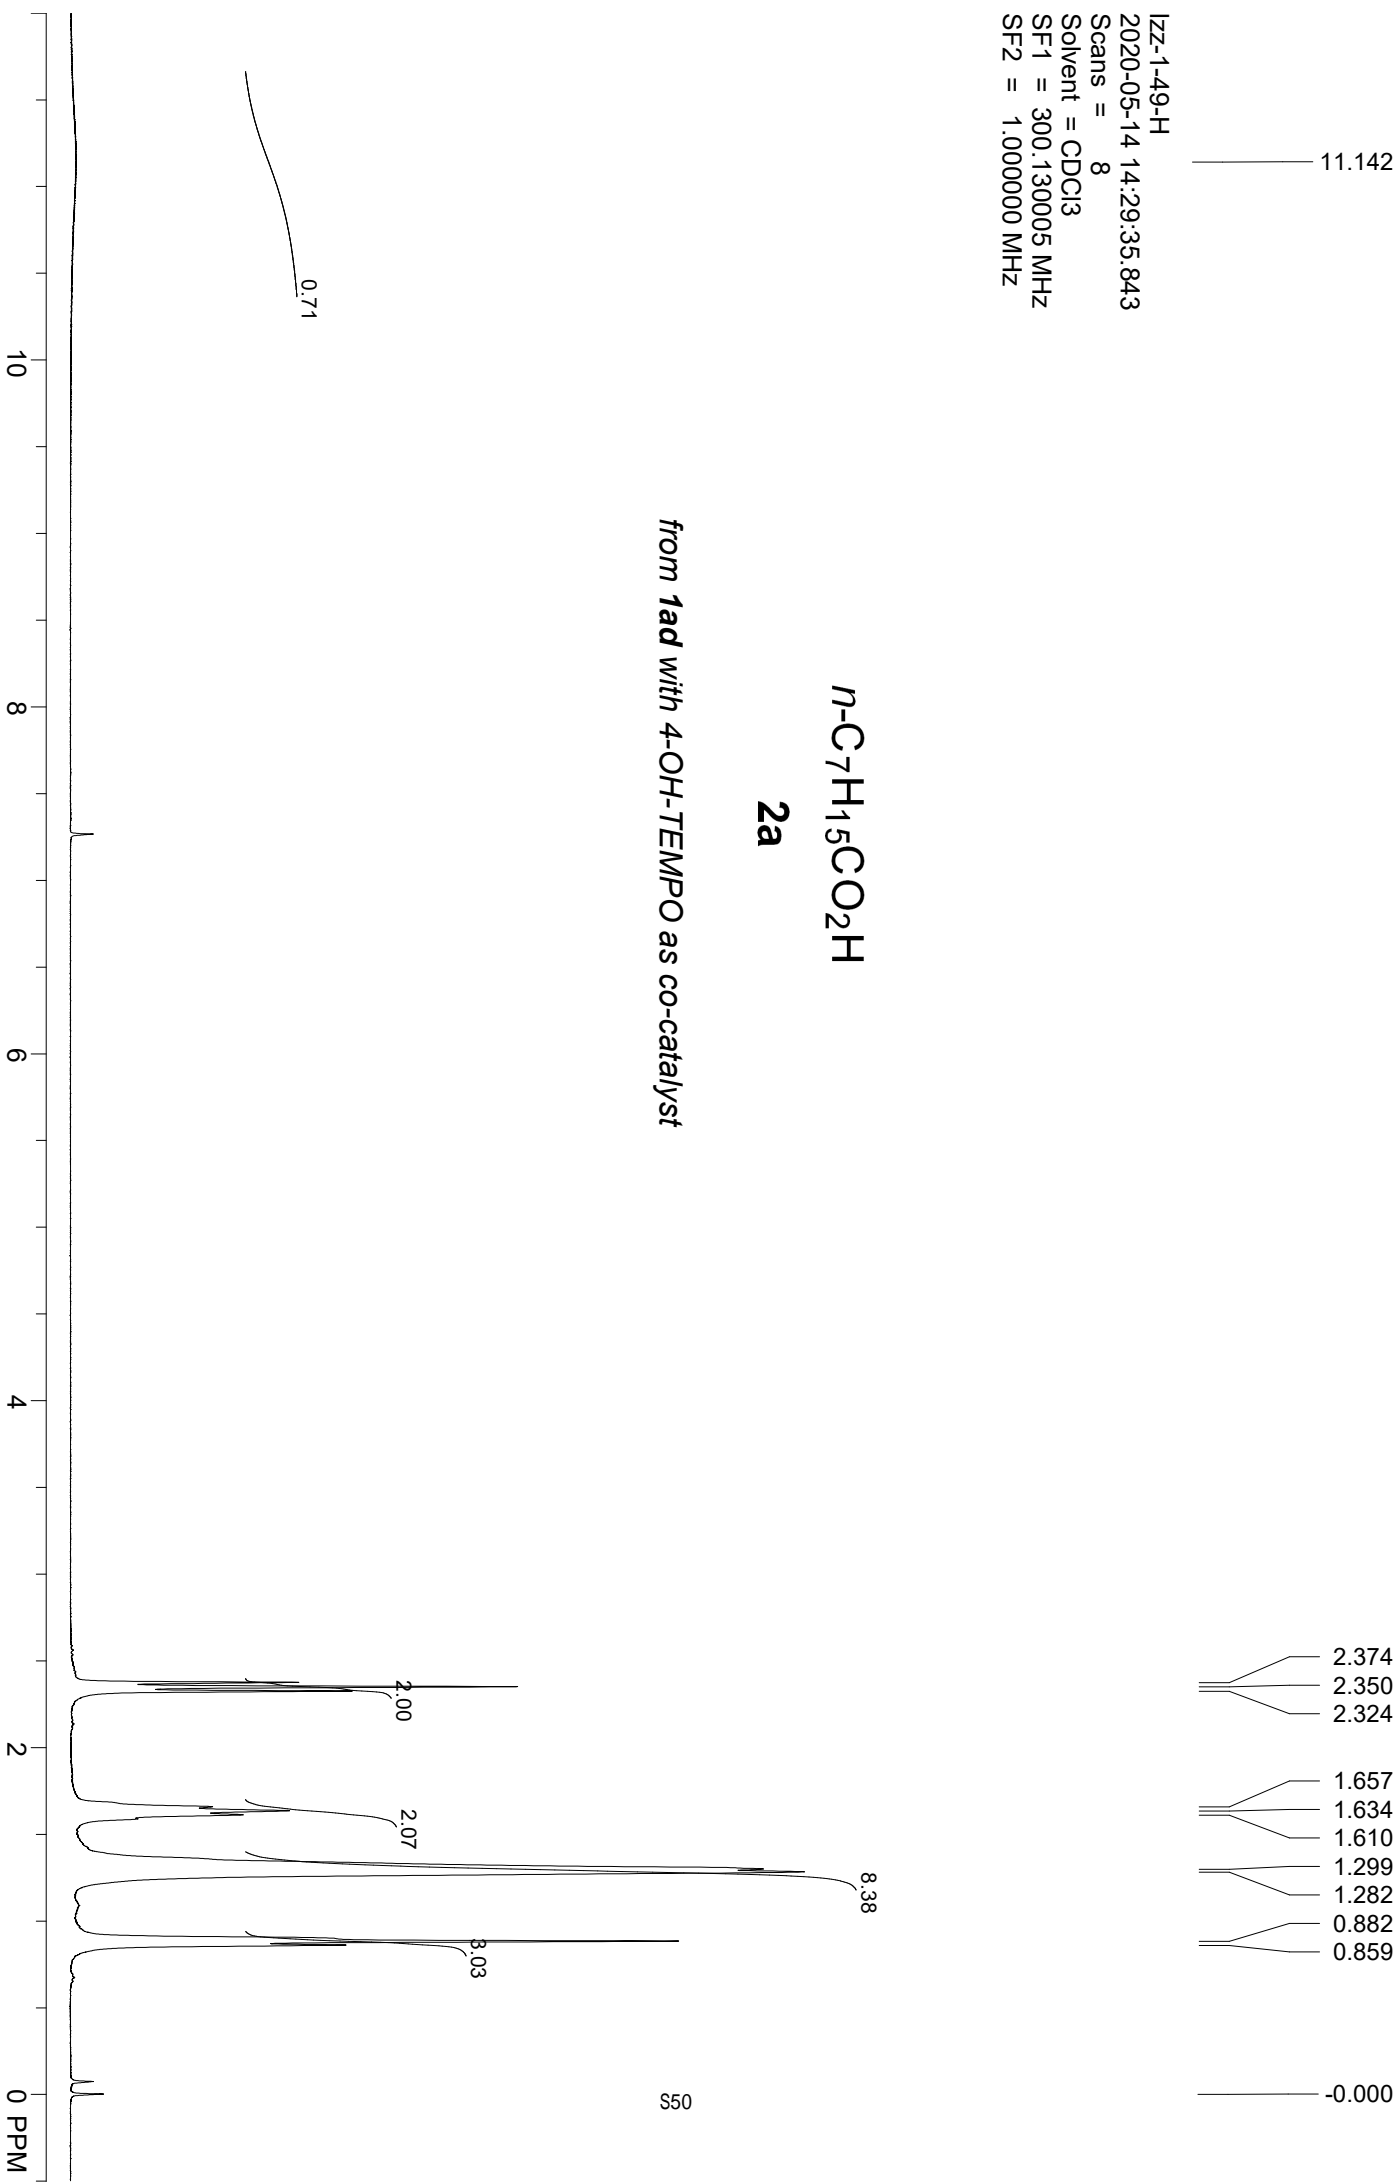

IZZ-1-49-C  
2020-05-14 15:37:01.109  
Scans = 108  
Solvent = CDCl3  
SF1 = 75.467751 MHz  
SF2 = 1.000000 MHz

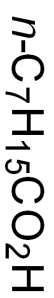

**2a**

from **1ad** with 4-OH-TEMPO as co-catalyst

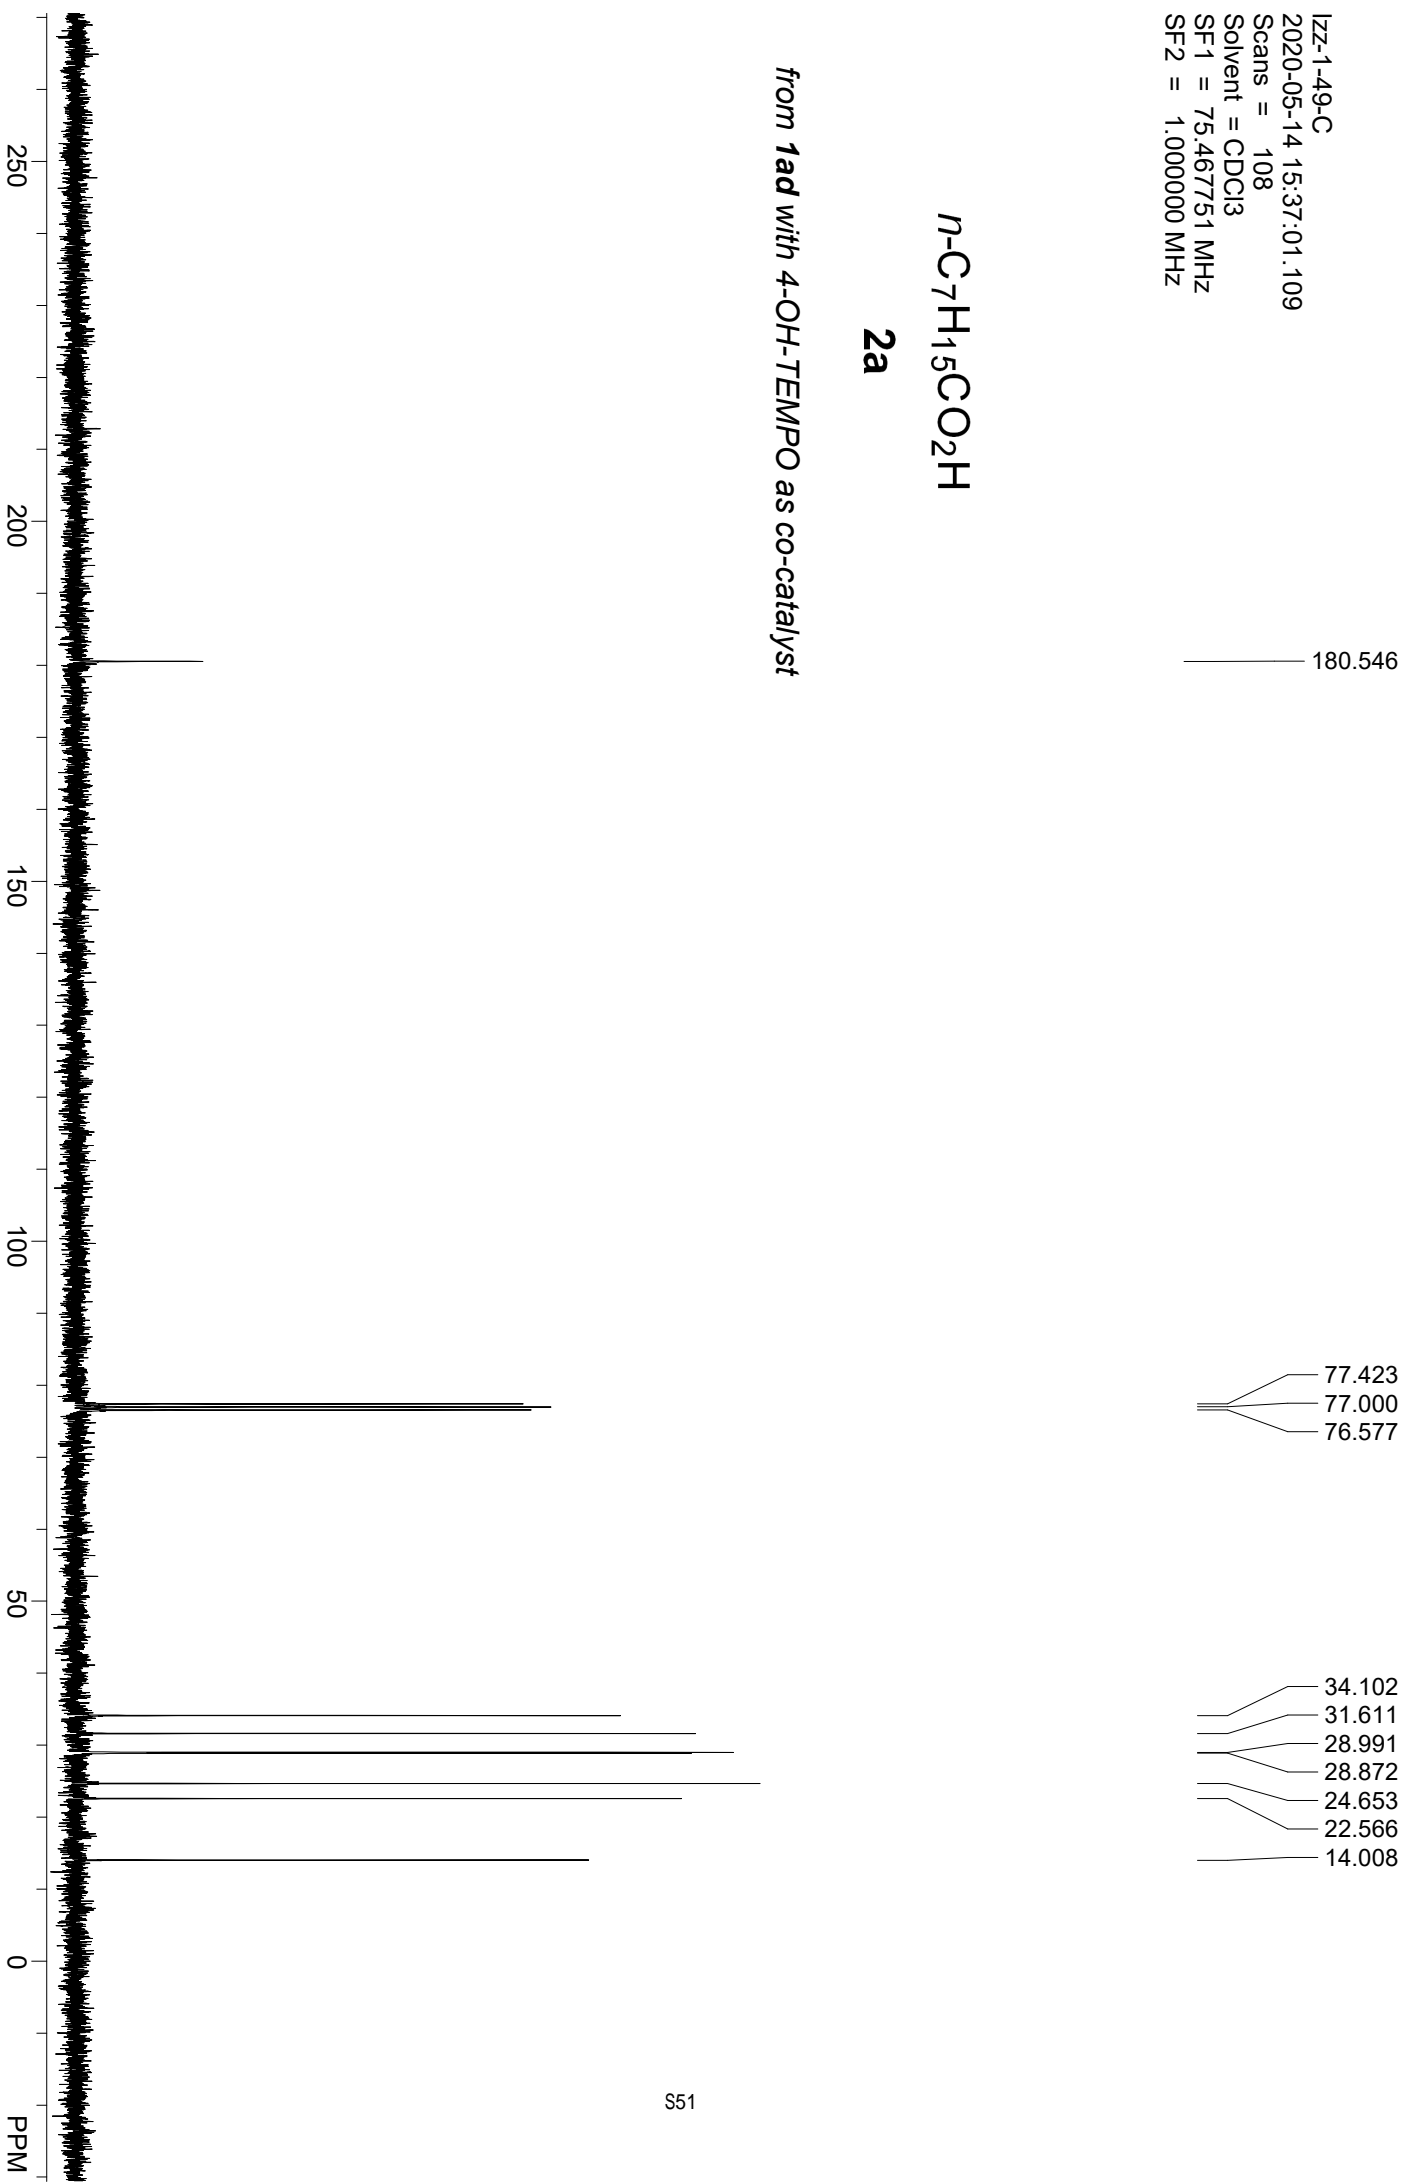

Izz-2-084-H  
Mar 30 2022  
Scans = 4  
Solvent = CDCl3  
SF1 = 399.717712 MHz  
SF2 = 100.517960 MHz

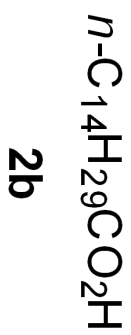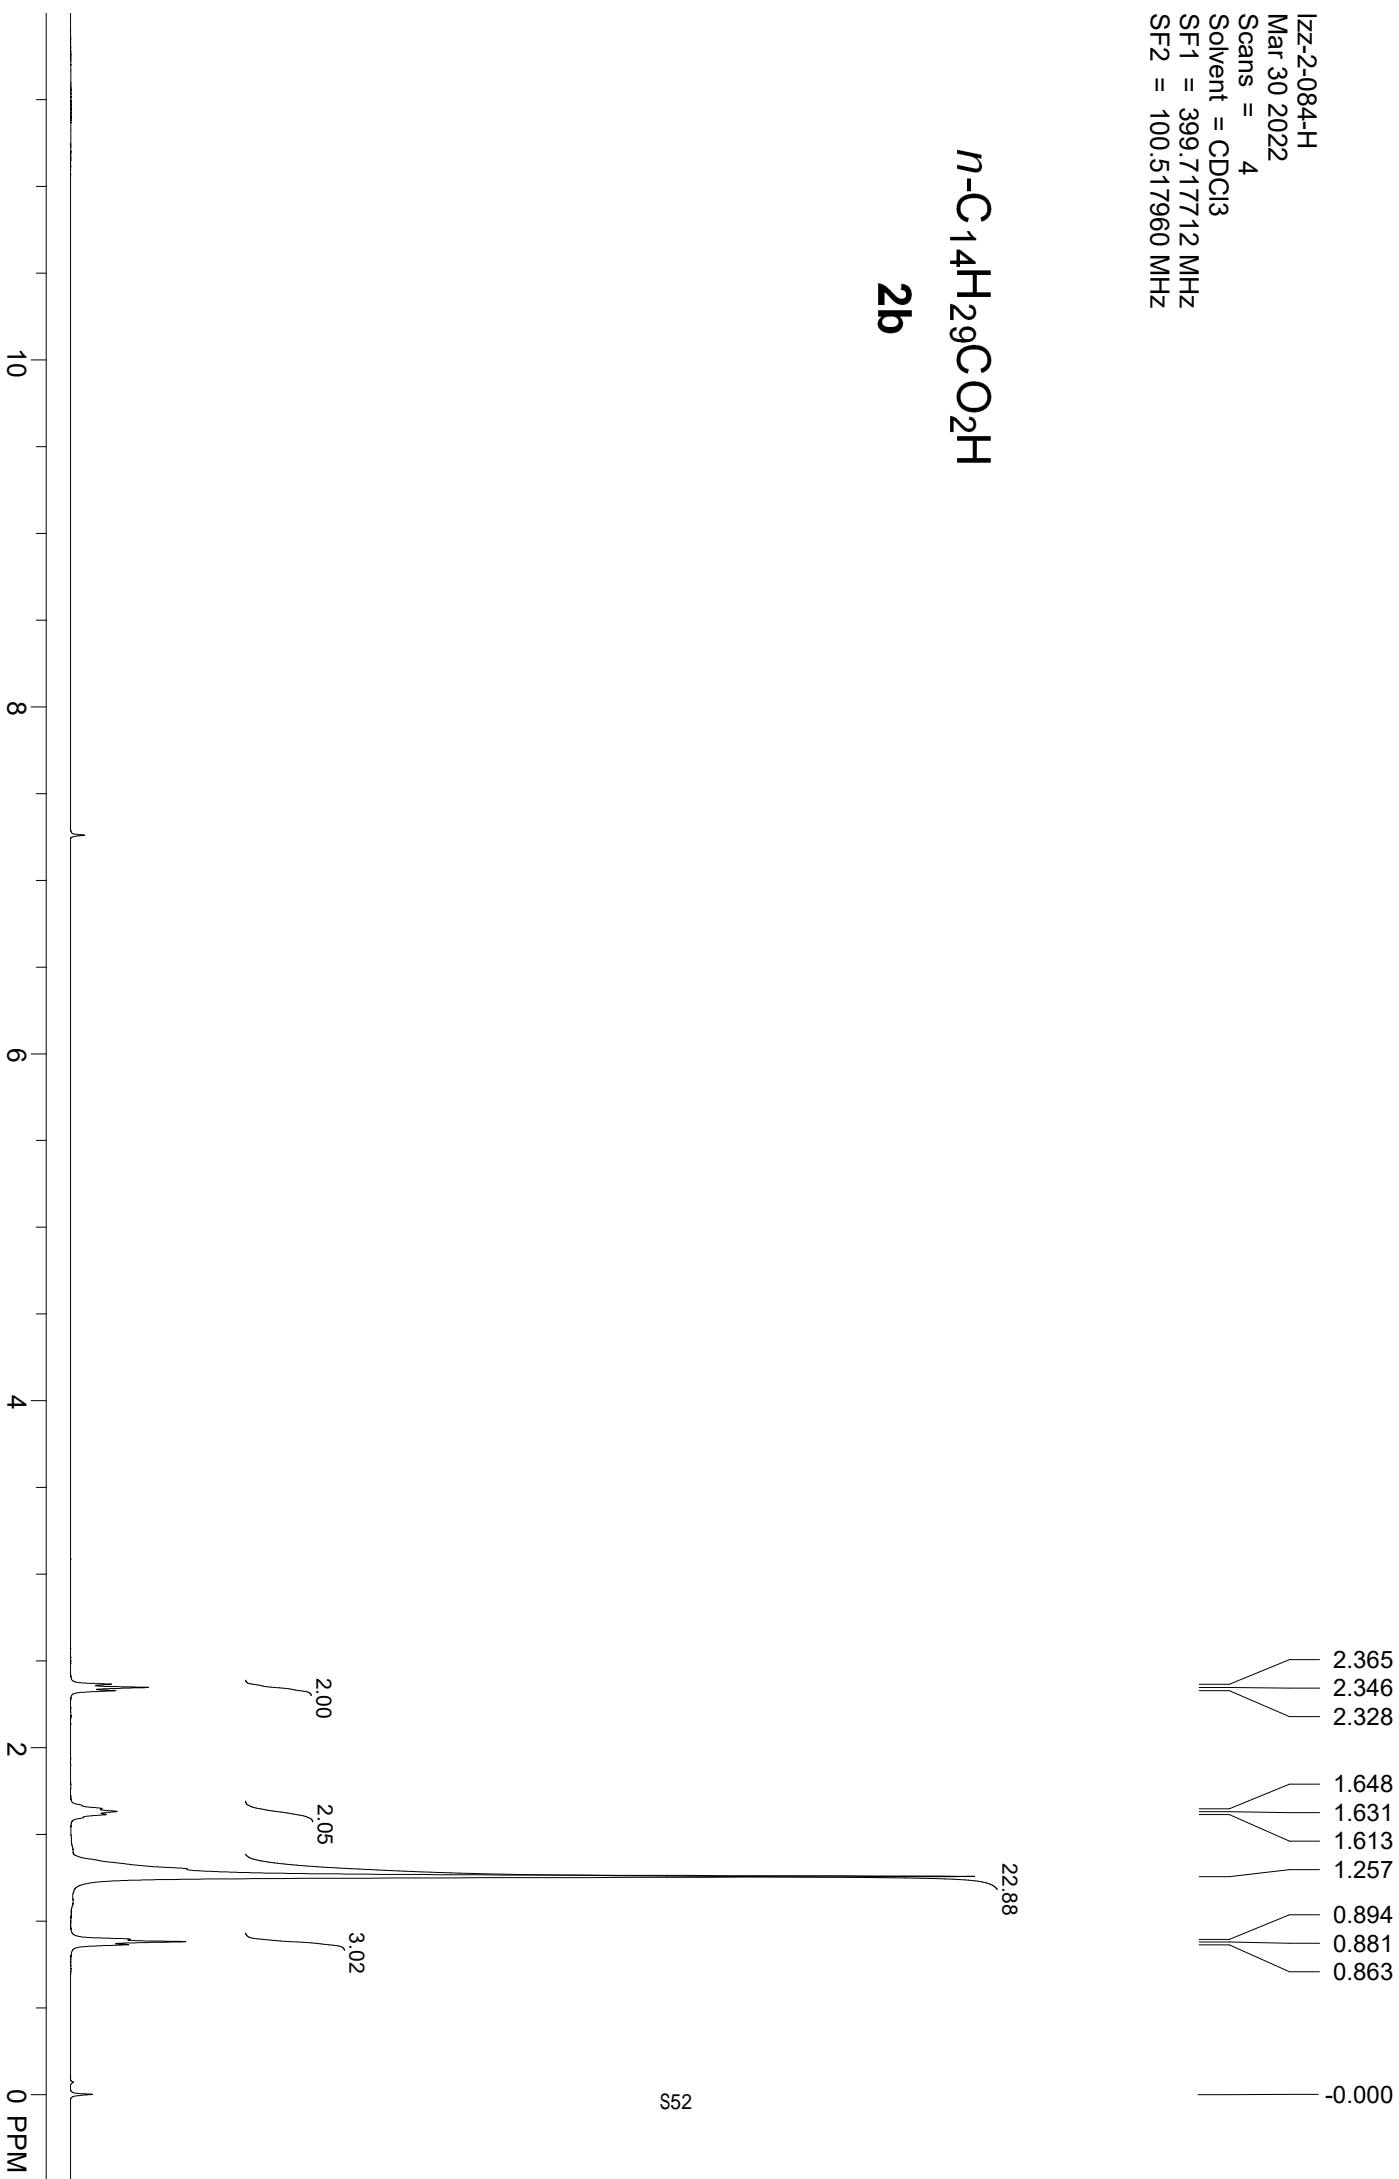

Izz-2-084-C  
Mar 30 2022  
Scans = 92  
Solvent = cdcl3  
SF1 = 100.519485 MHz  
SF2 = 399.717072 MHz

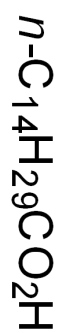

**2b**

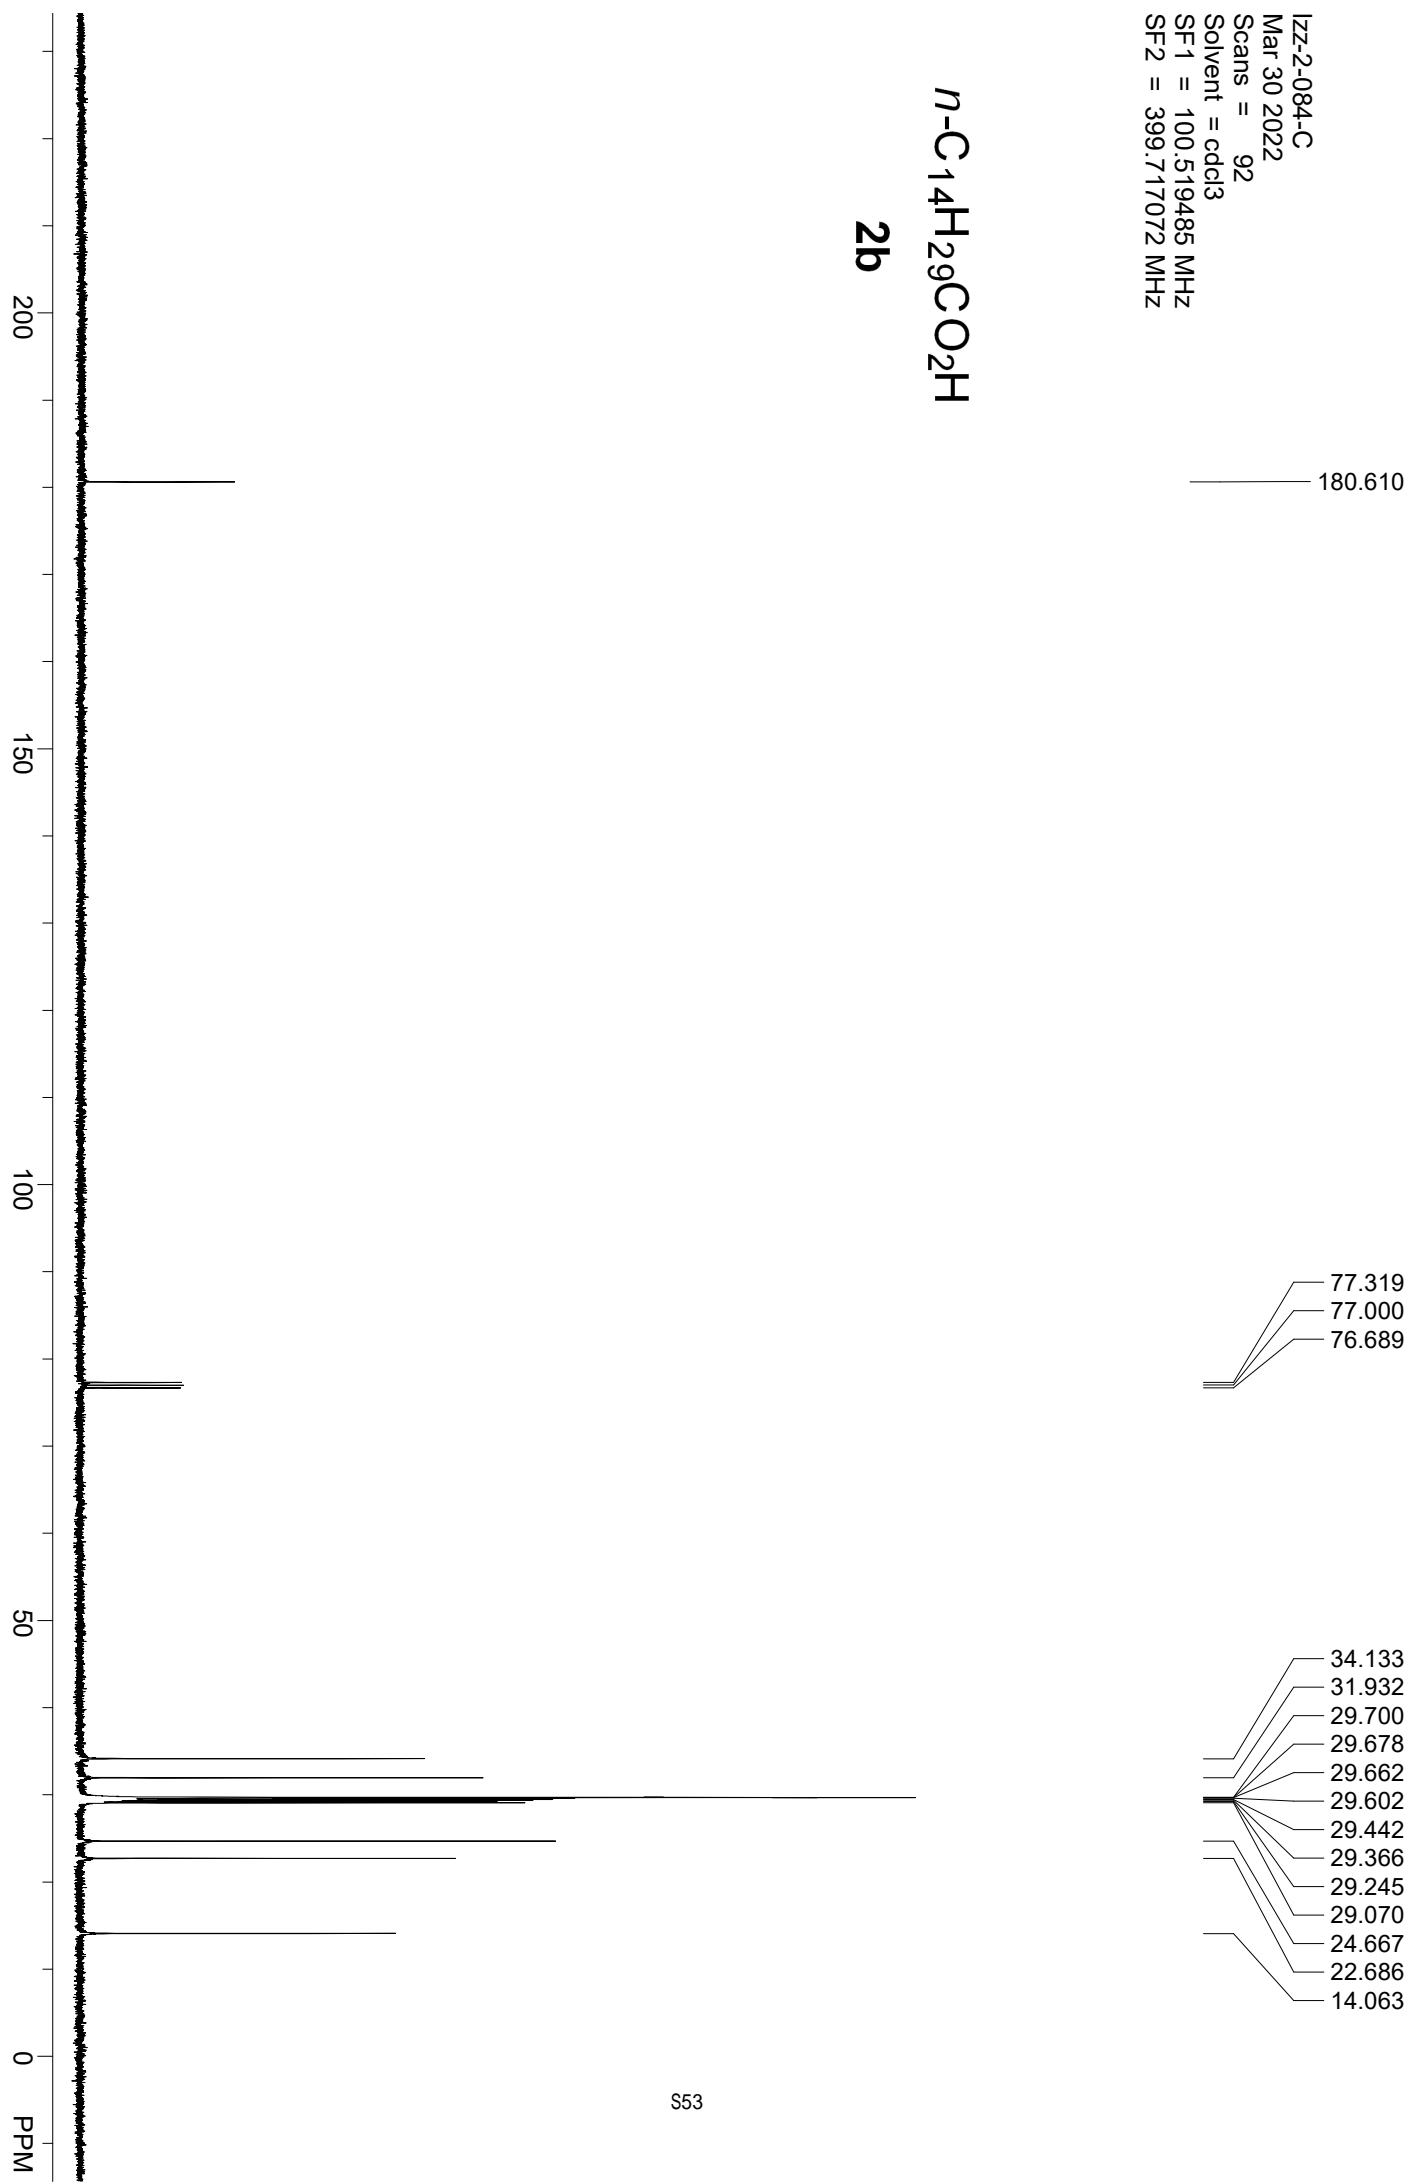

lzz-4-011-H  
Feb 11 2023  
Scans = 8  
Solvent = CDCl3  
SF1 = 399.717651 MHz  
SF2 = 100.517960 MHz

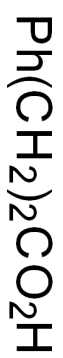

**2c**

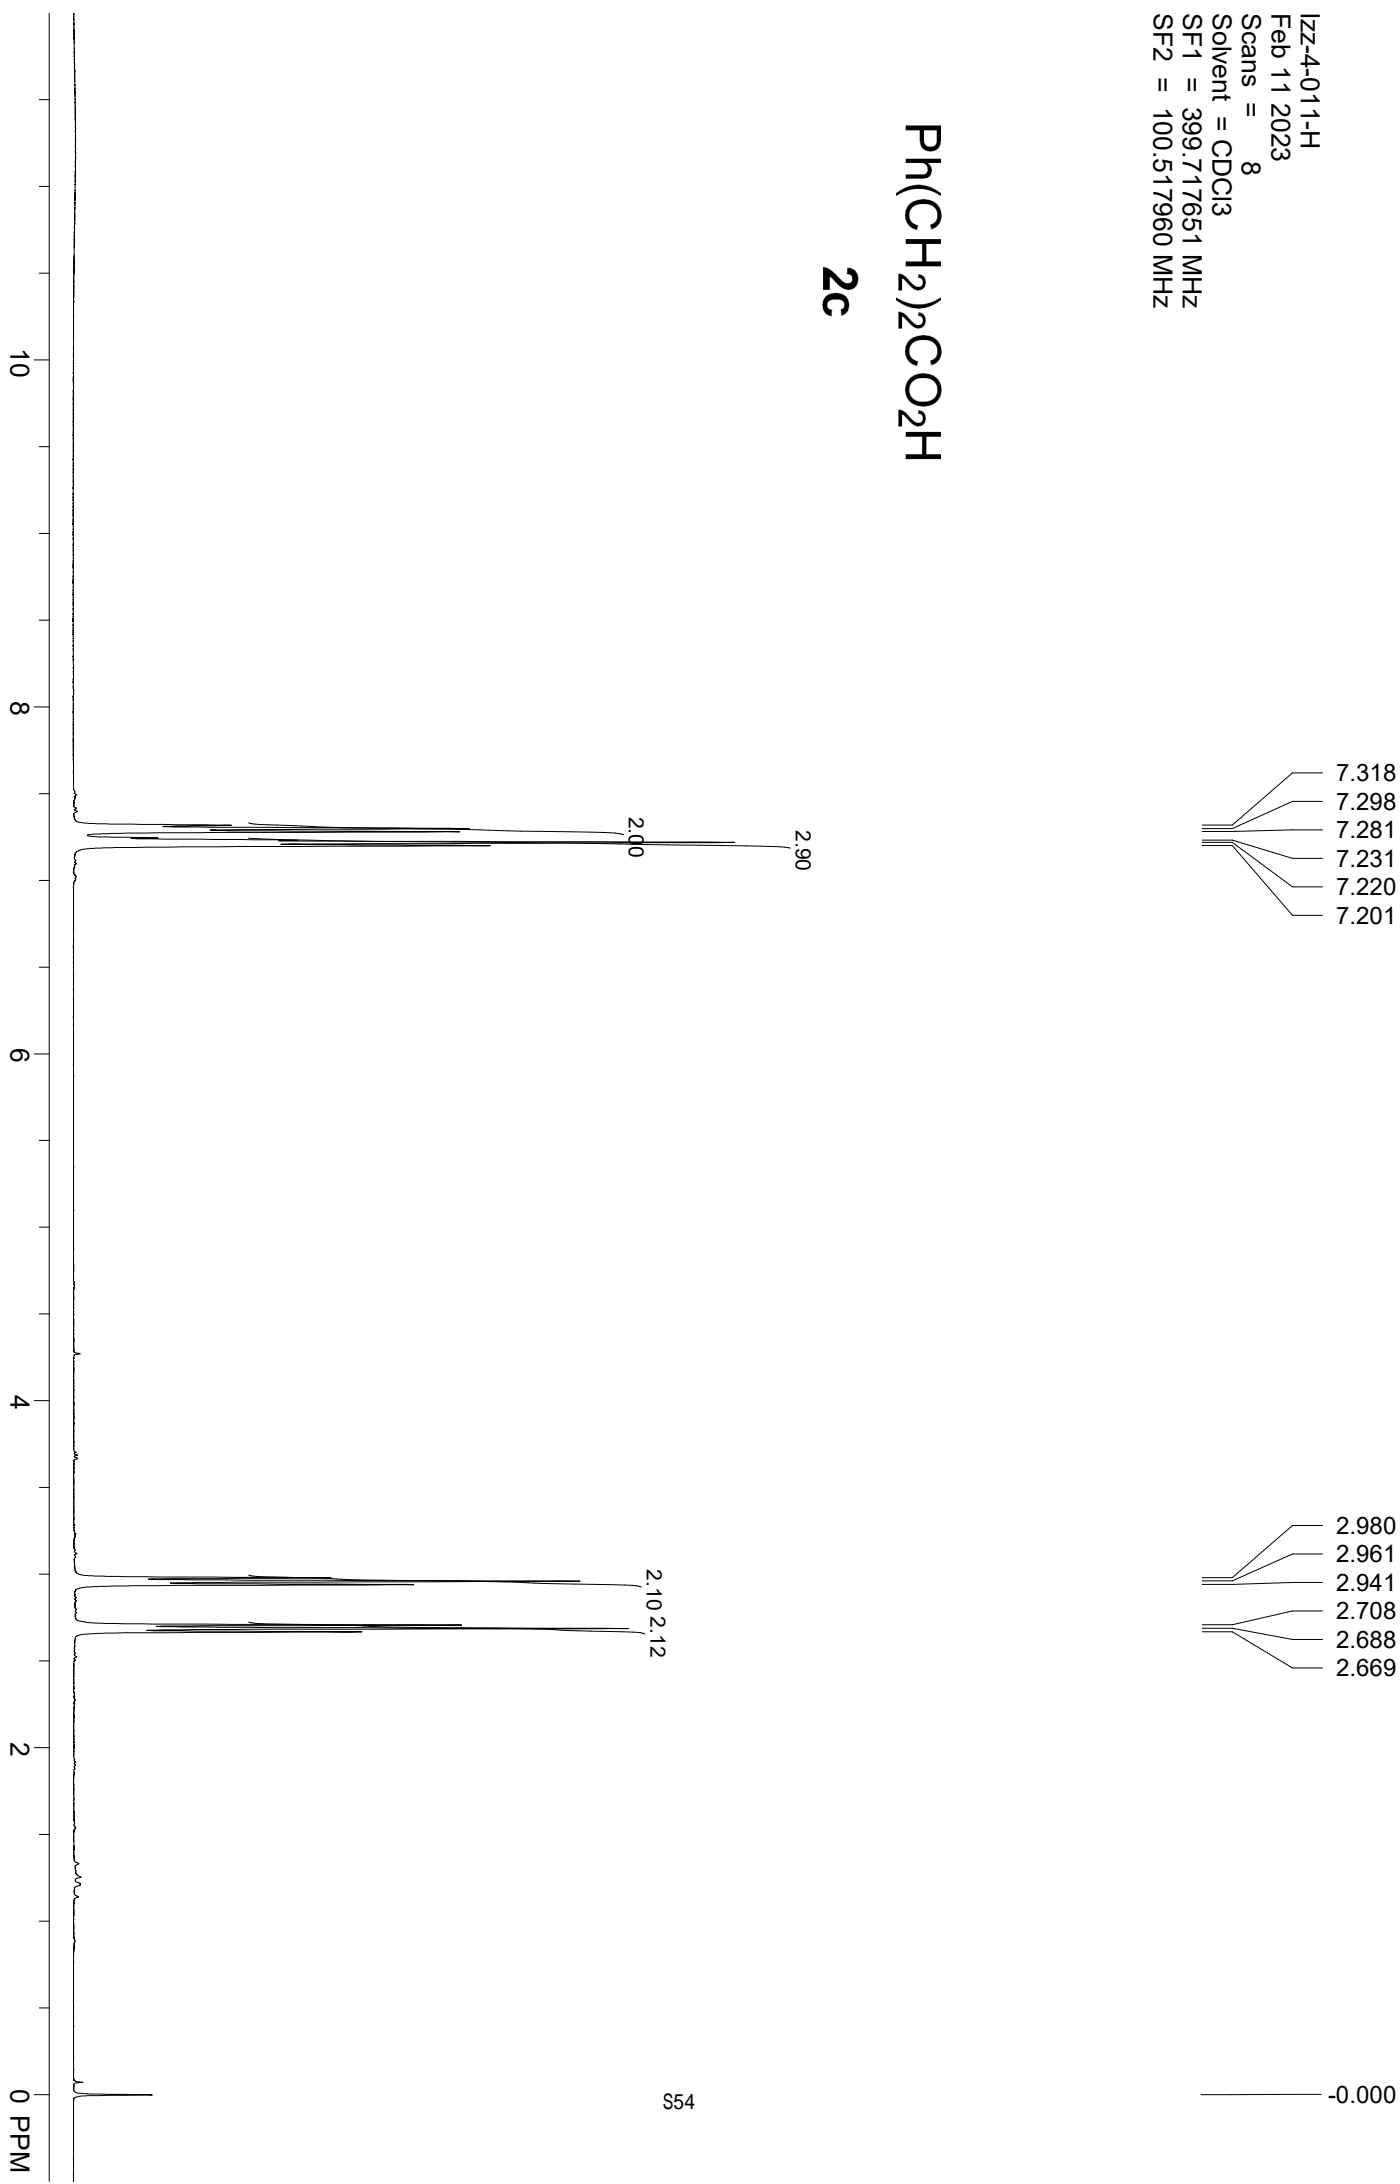

IZZ-4-011-C  
Feb 11 2023  
Scans = 48  
Solvent = cdcl3  
SF1 = 100.519485 MHz  
SF2 = 399.717072 MHz

$\text{Ph}(\text{CH}_2)_2\text{CO}_2\text{H}$   
**2c**

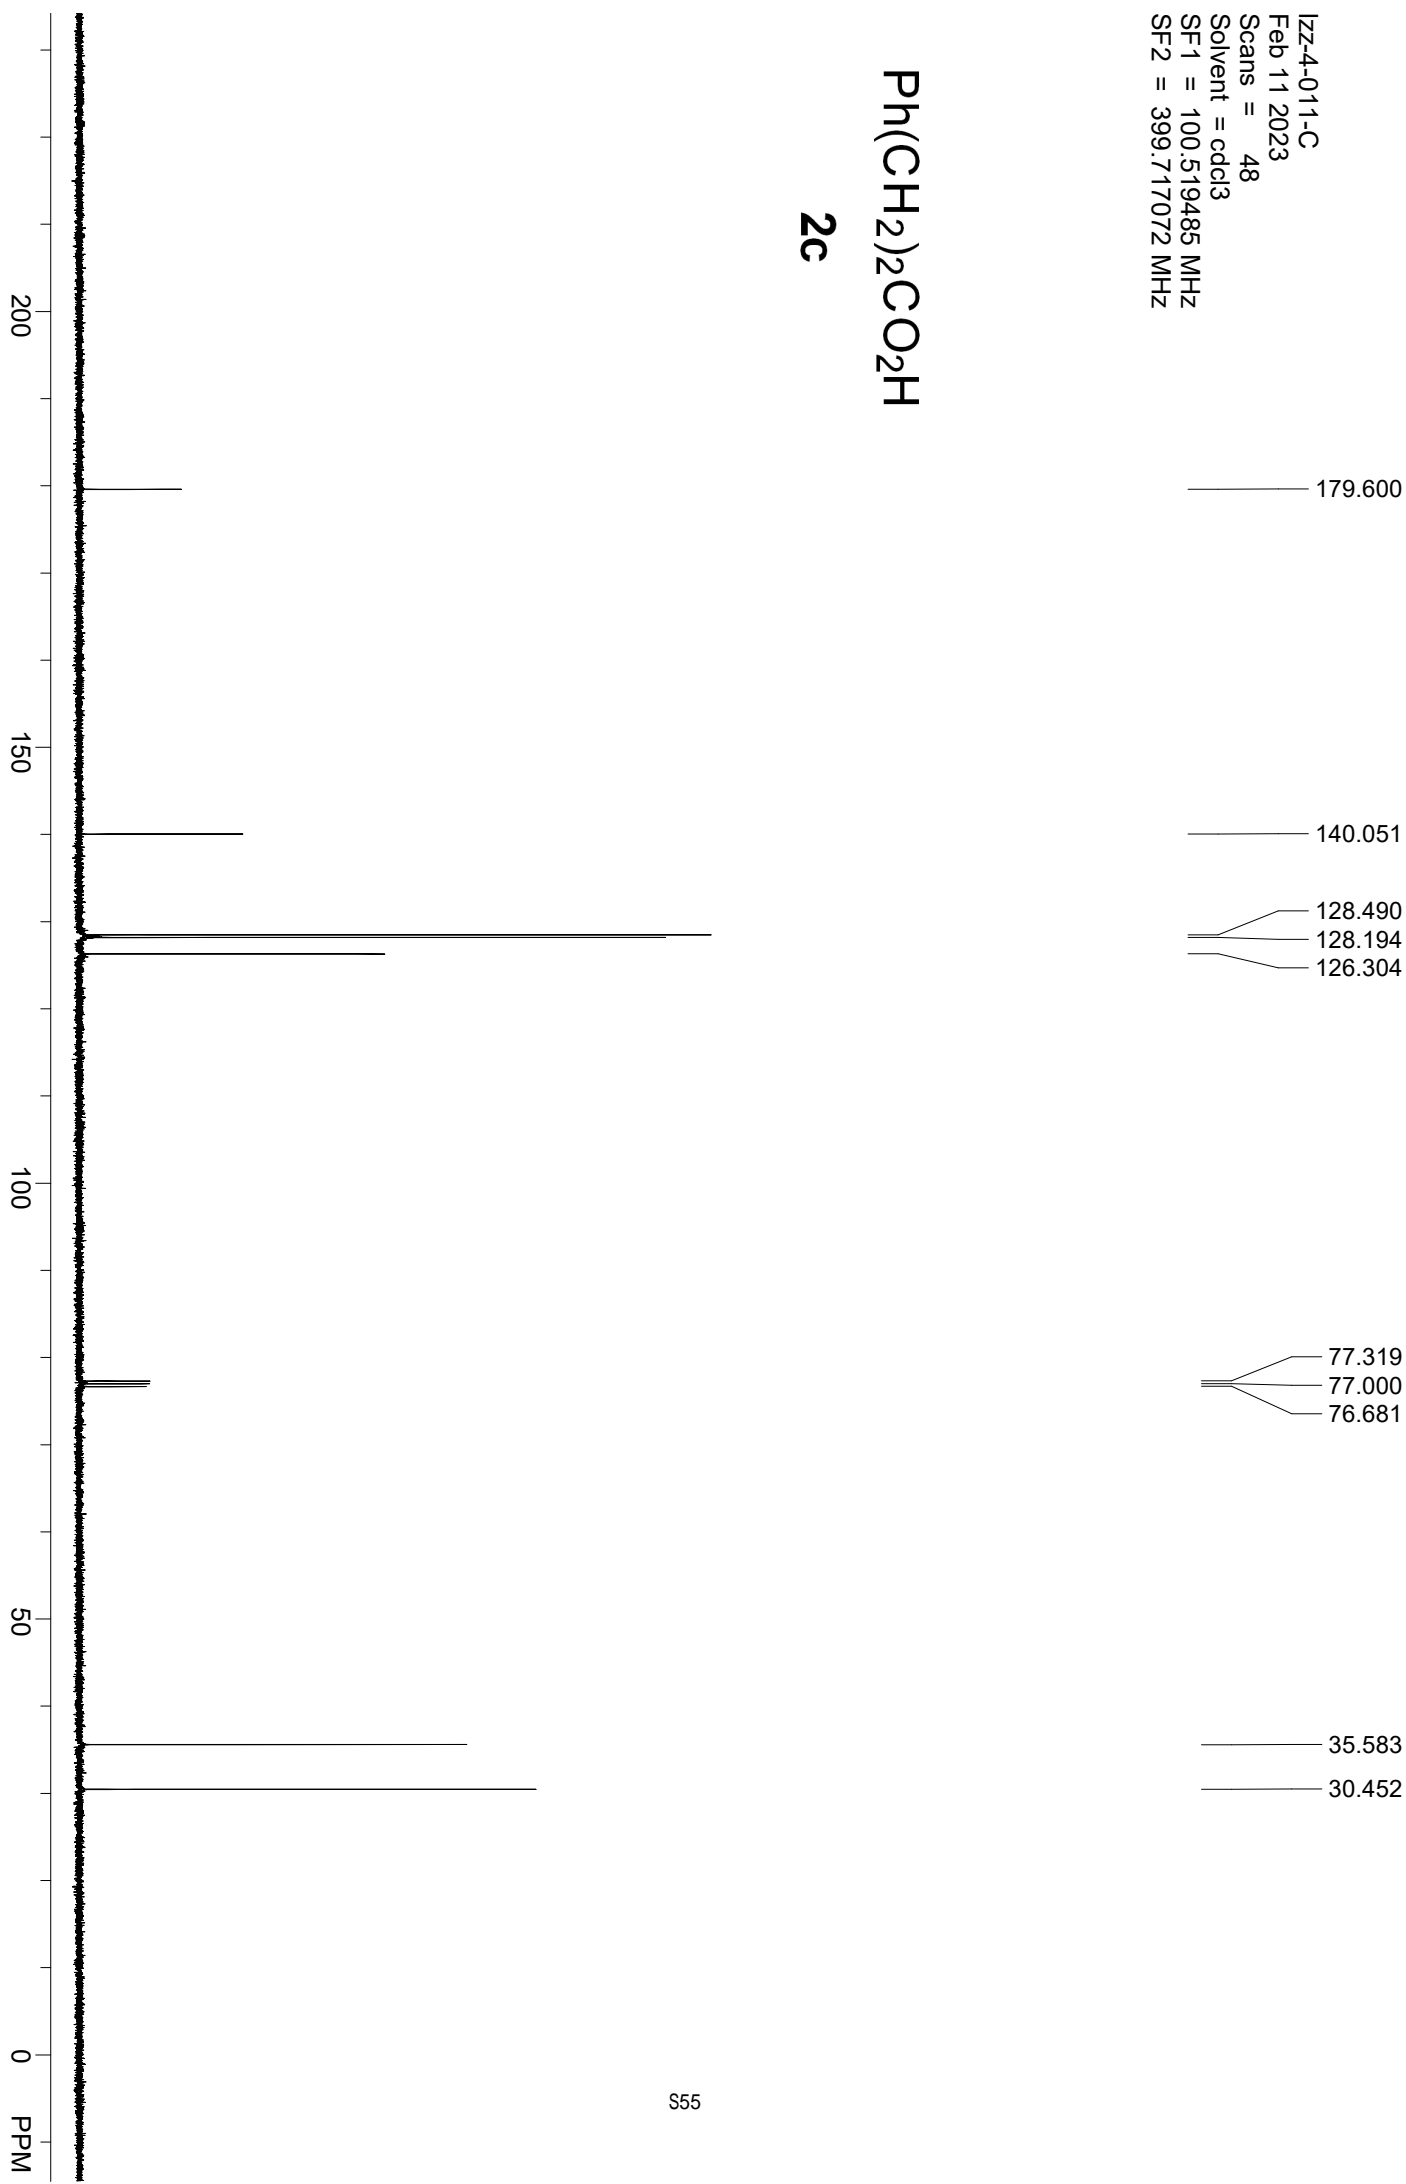

lzz-1-68-H  
2020-06-08 15:59:04.000  
Scans = 8  
Solvent = CDCl3  
SF1 = 300.130005 MHz  
SF2 = 1.000000 MHz

10.476

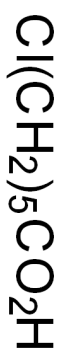

**2d**

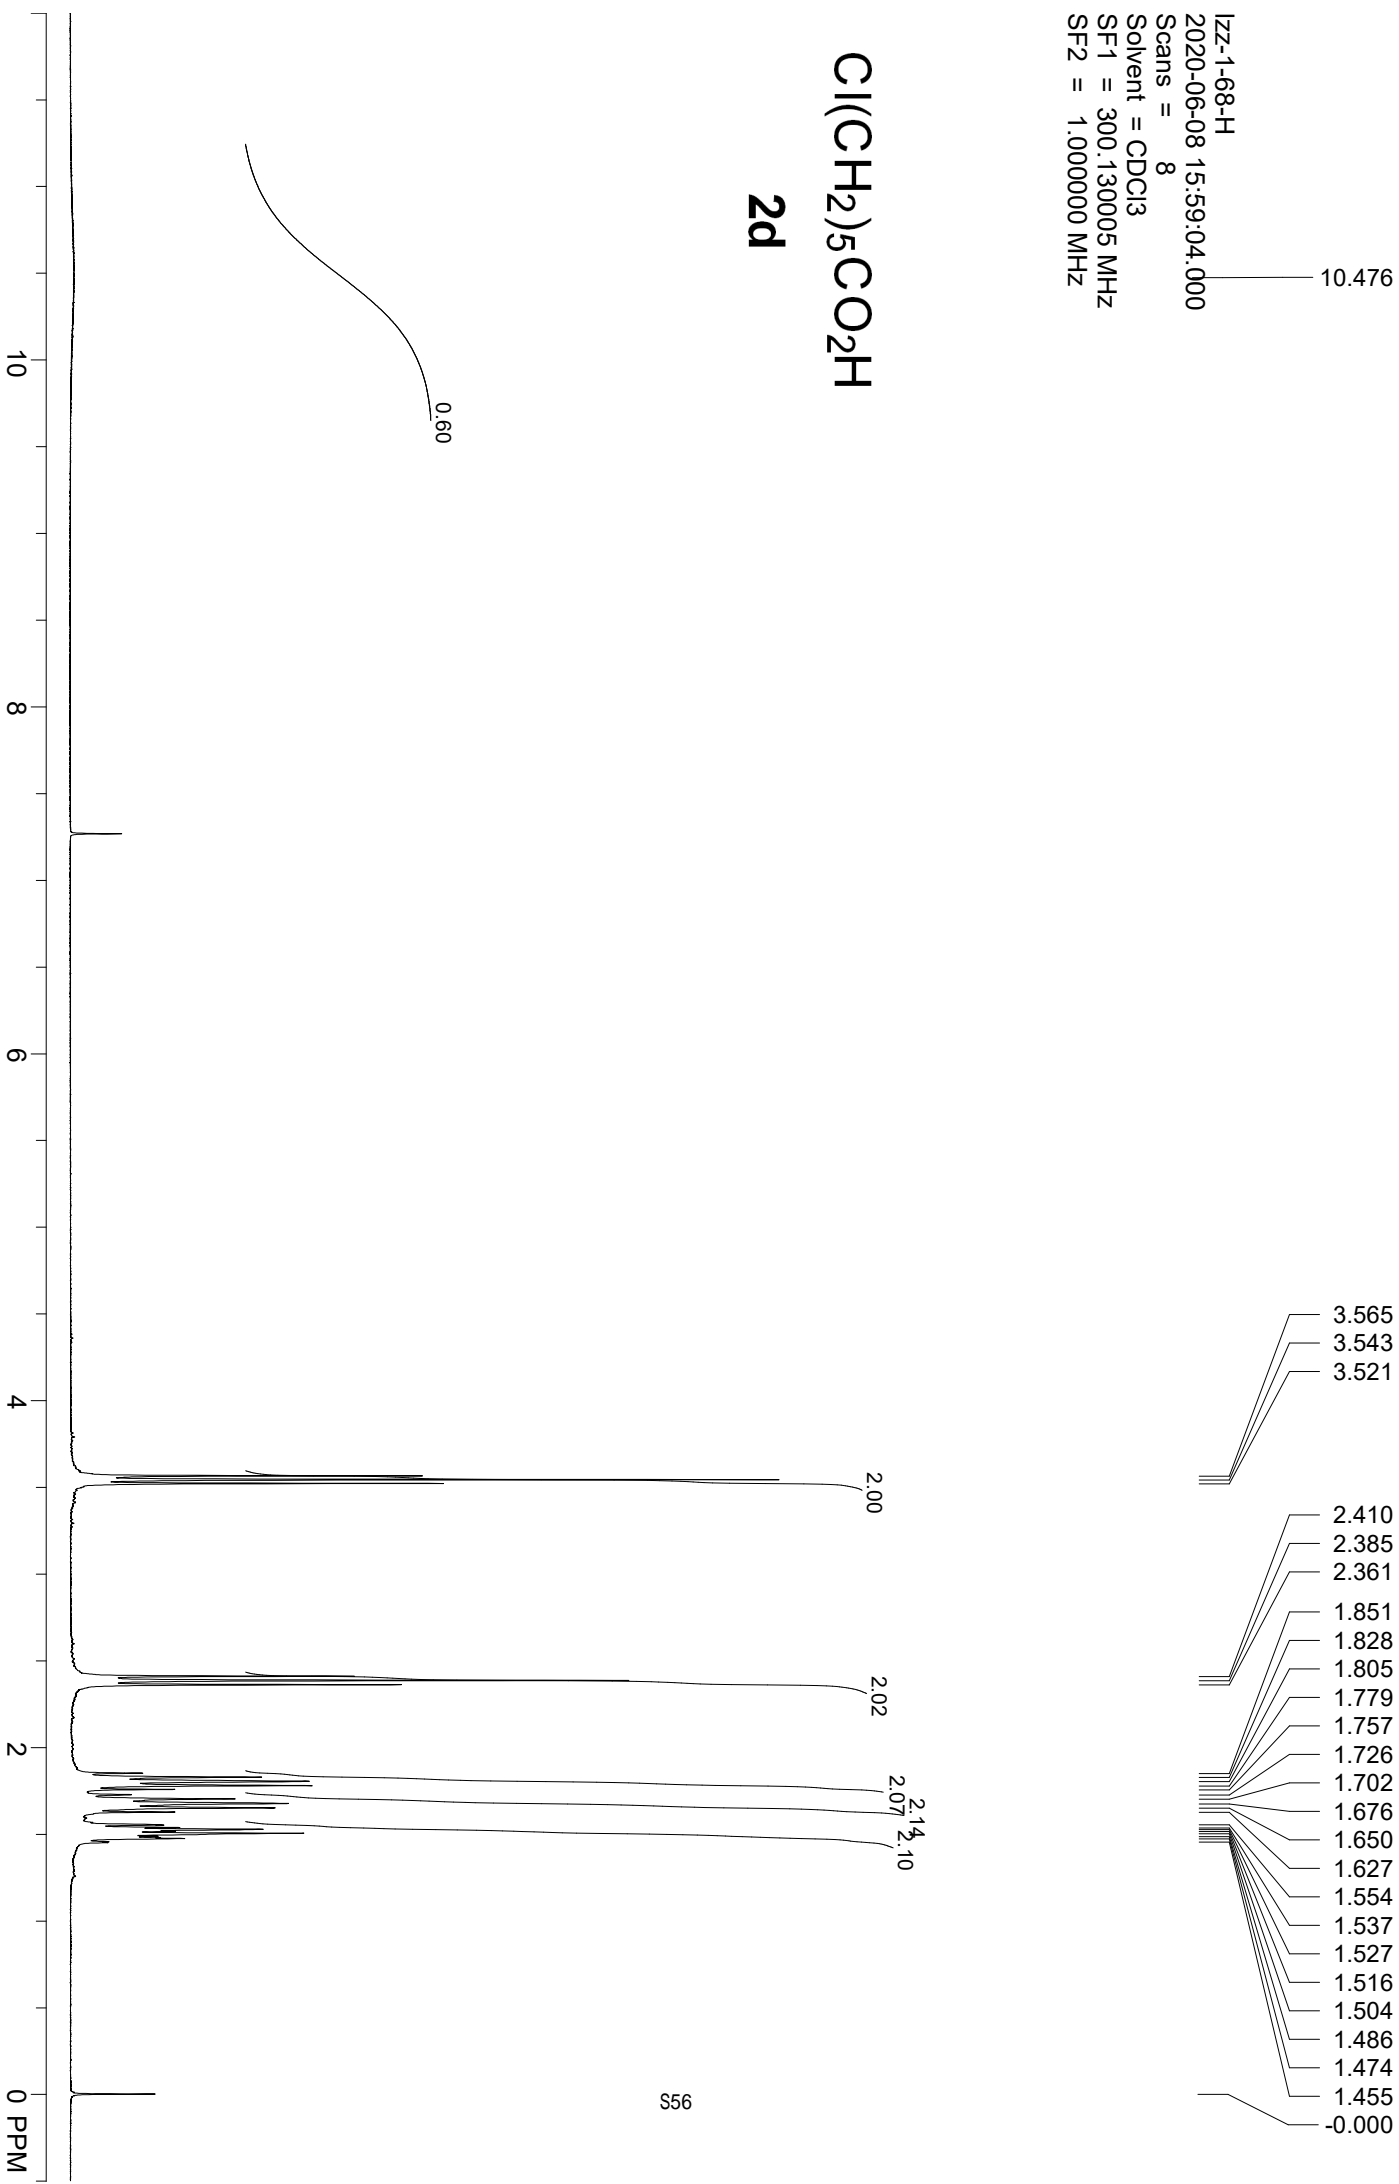



lzz-1-68-C  
2020-06-08 16:20:30.031  
Scans = 161  
Solvent = CDCl3  
SF1 = 75.467751 MHz  
SF2 = 1.000000 MHz

$\text{Cl}(\text{CH}_2)_5\text{CO}_2\text{H}$   
**2d**

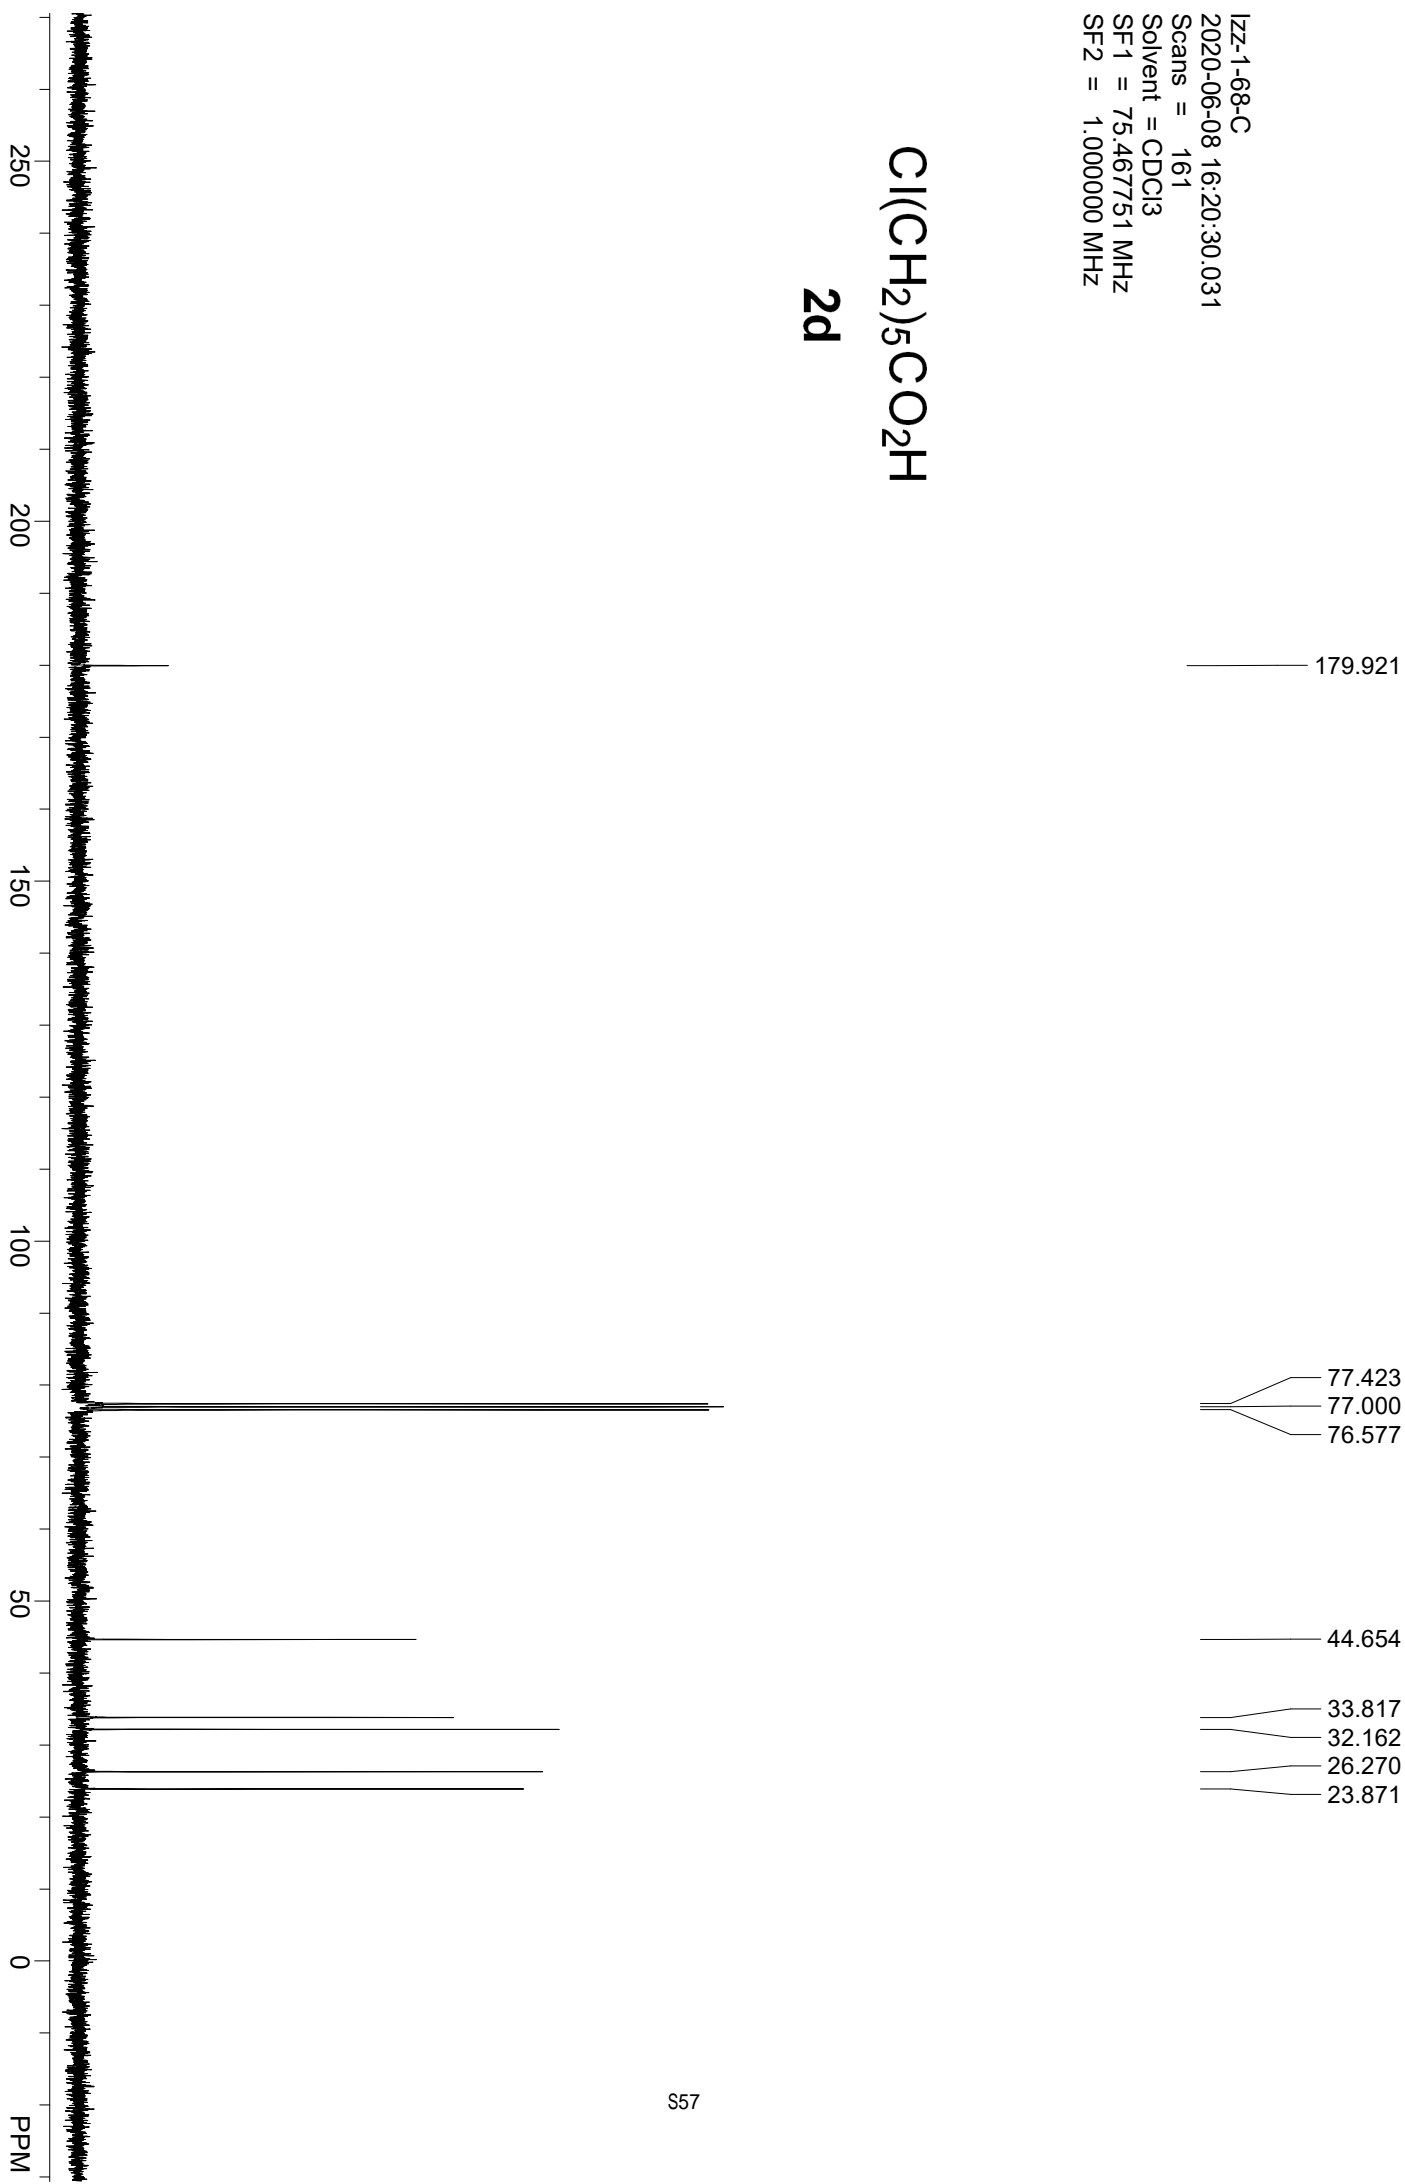

lzz-6-061-H  
Jan 9 2024  
Scans = 8  
Solvent = CDCl3  
SF1 = 399.718048 MHz  
SF2 = 100.517960 MHz

# Br(CH<sub>2</sub>)<sub>8</sub>CO<sub>2</sub>H 2e

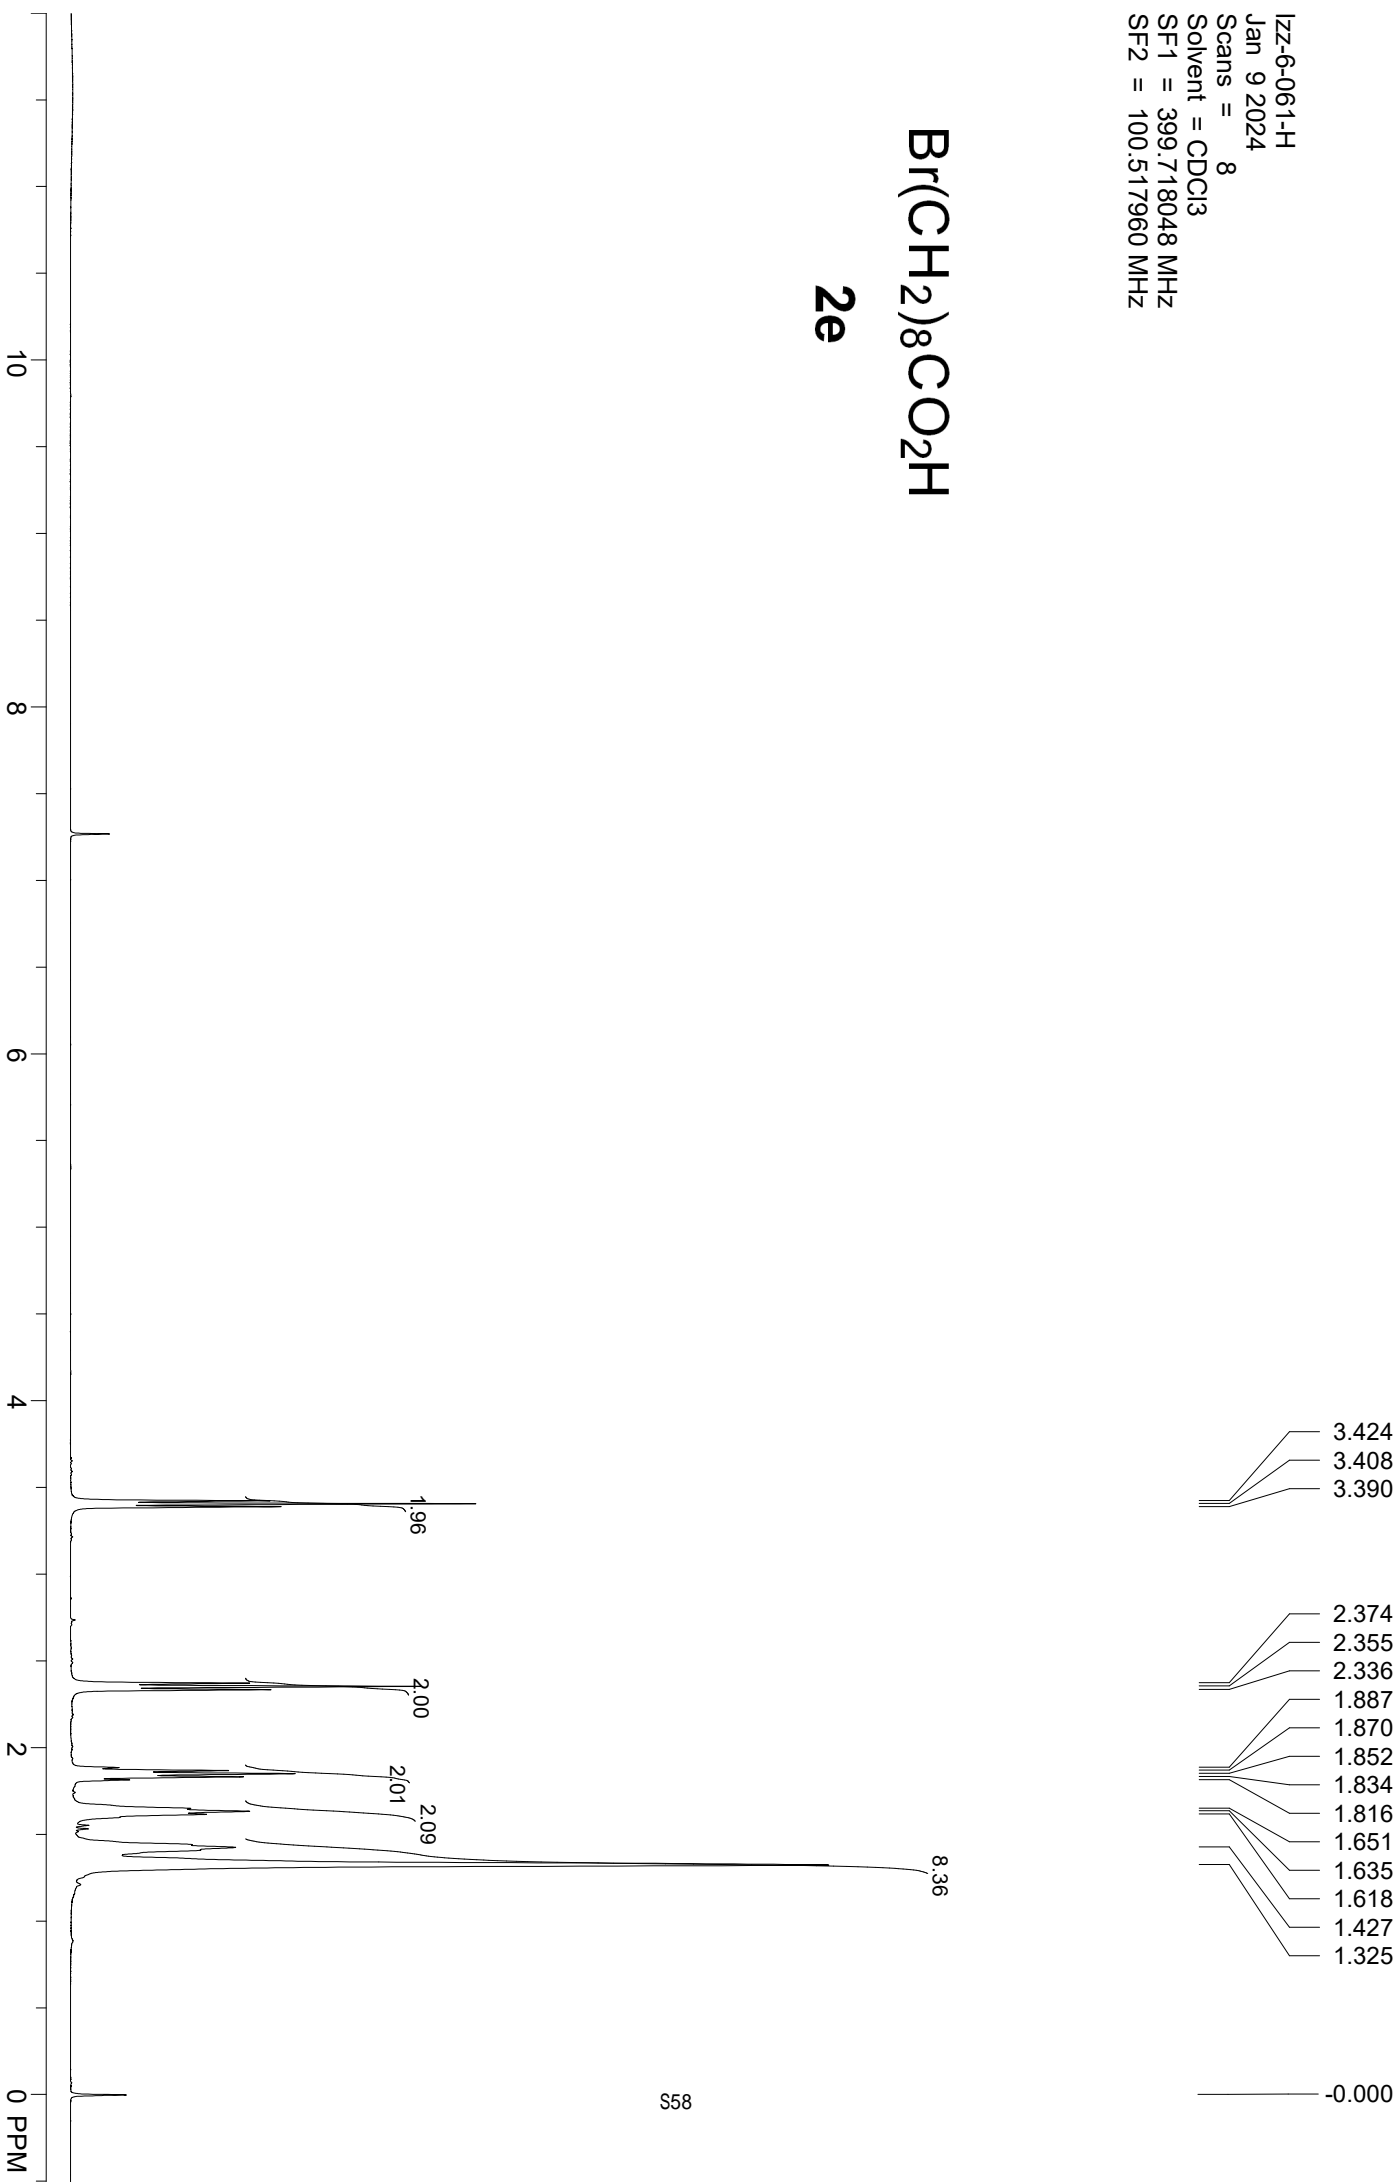

lzz-6-061-C  
Jan 9 2024  
Scans = 40  
Solvent = cdcl3  
SF1 = 100.519485 MHz  
SF2 = 399.717072 MHz

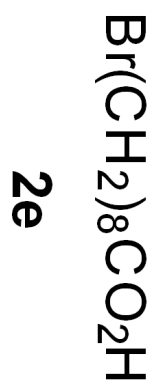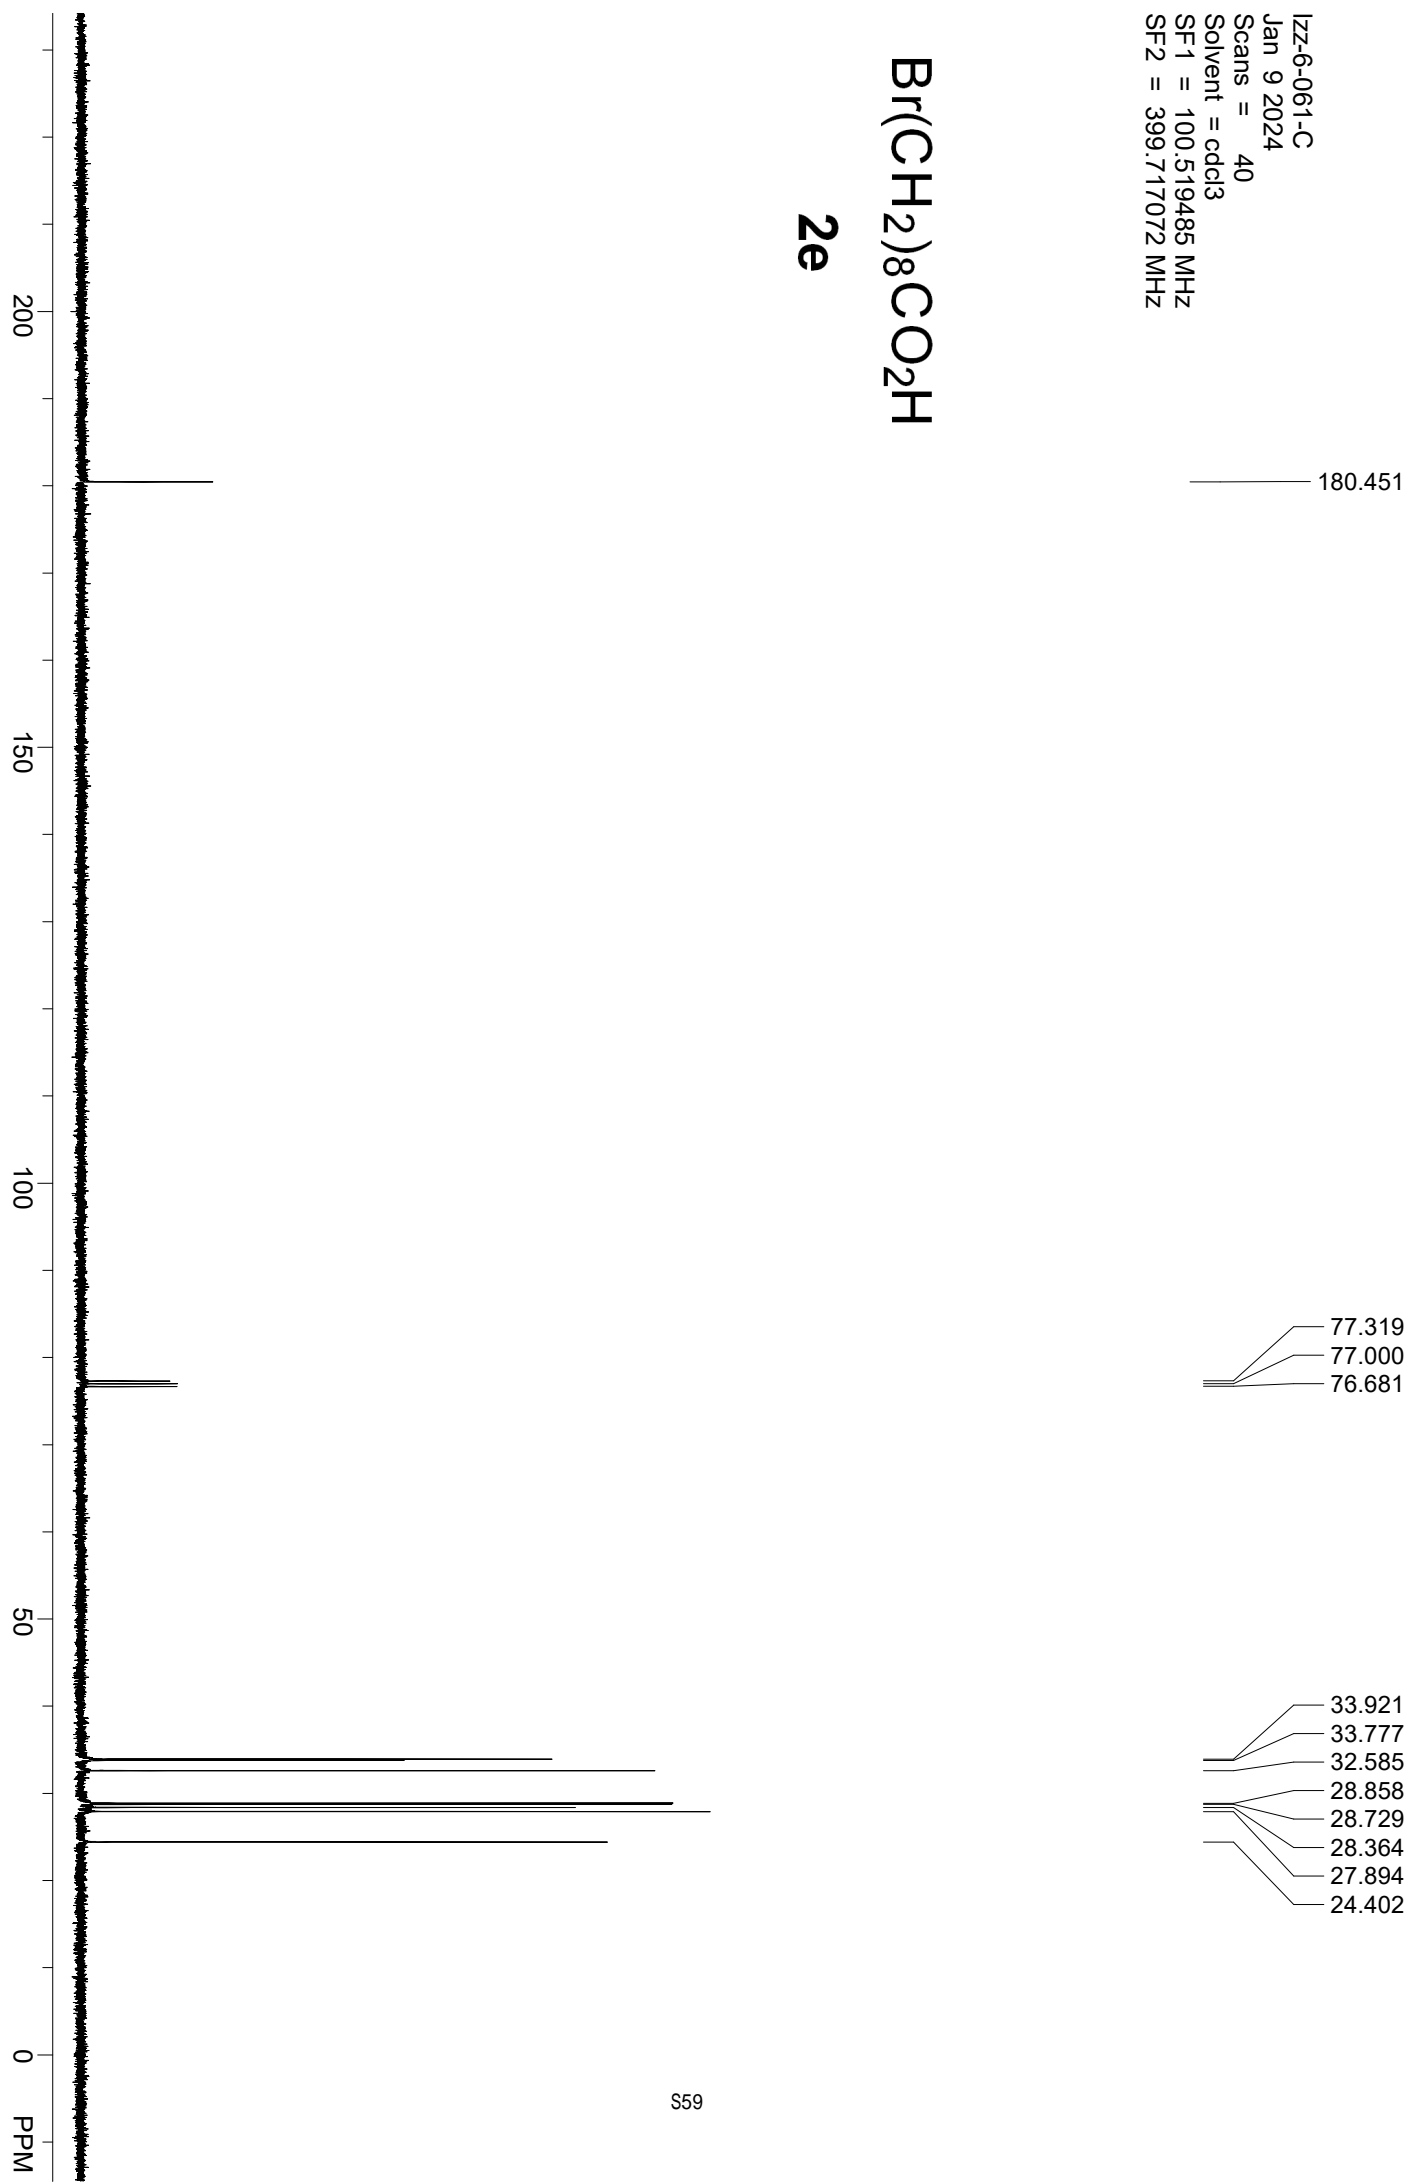

lzz-2-061-H  
Mar 16 2022  
Scans = 8  
Solvent = CDCl3  
SF1 = 399.717712 MHz  
SF2 = 100.517960 MHz

# BnO(CH<sub>2</sub>)<sub>2</sub>CO<sub>2</sub>H

## 2f

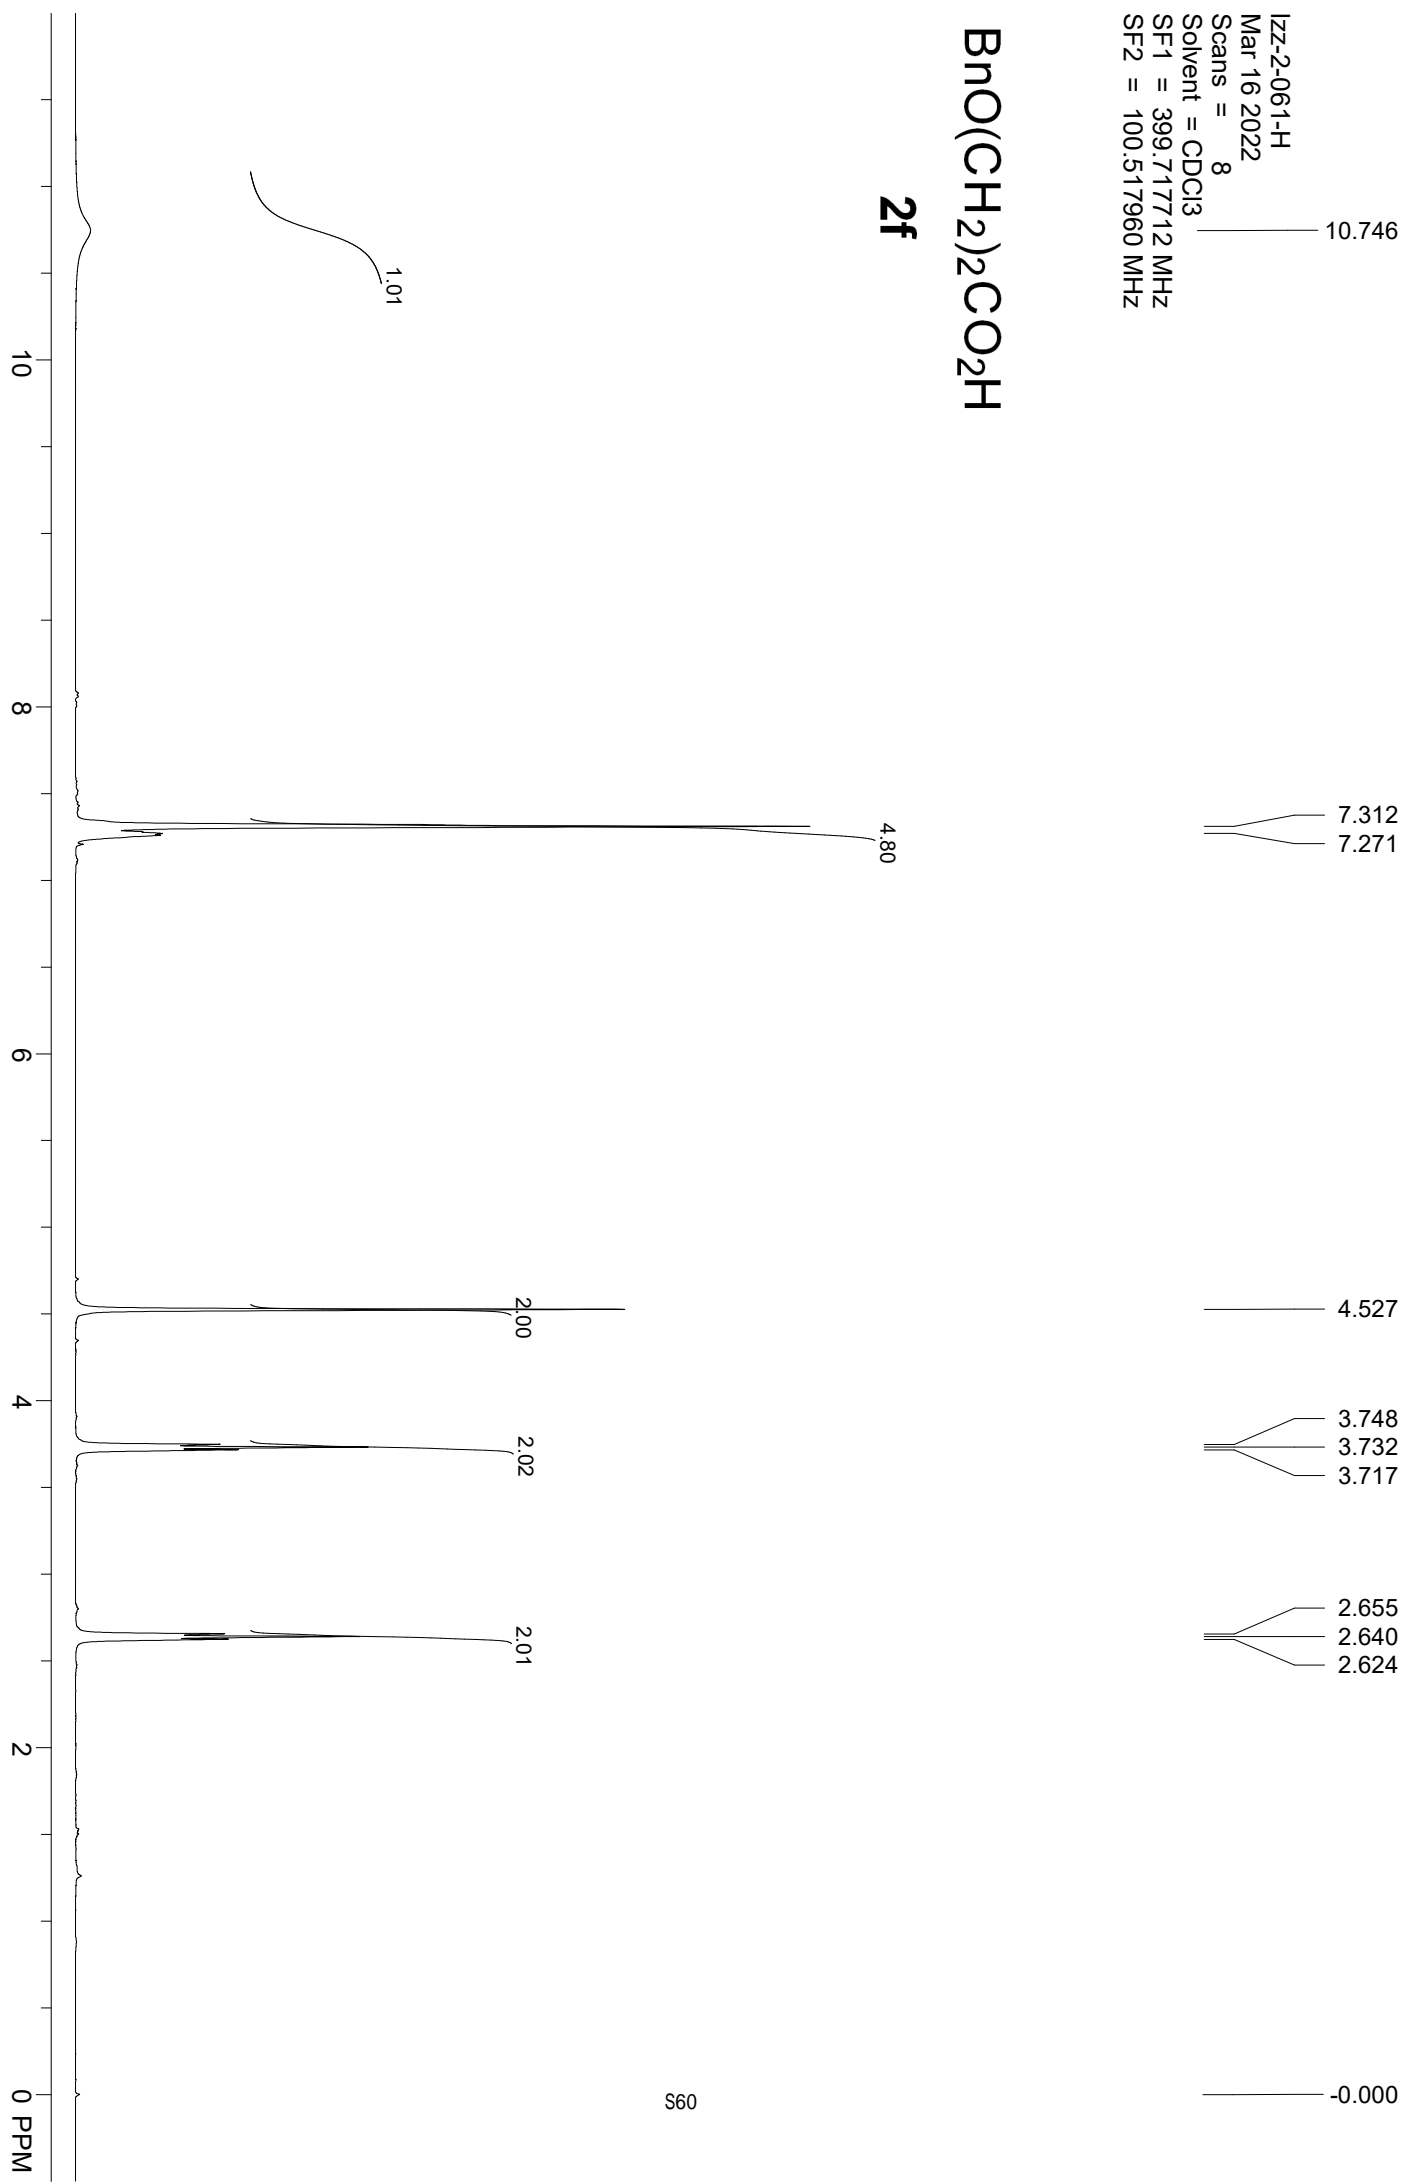

lzz-2-061-C  
Mar 16 2022  
Scans = 308  
Solvent = cdcl3  
SF1 = 100.598389 MHz  
SF2 = 400.030792 MHz

**BnO(CH<sub>2</sub>)<sub>2</sub>CO<sub>2</sub>H**  
**2f**

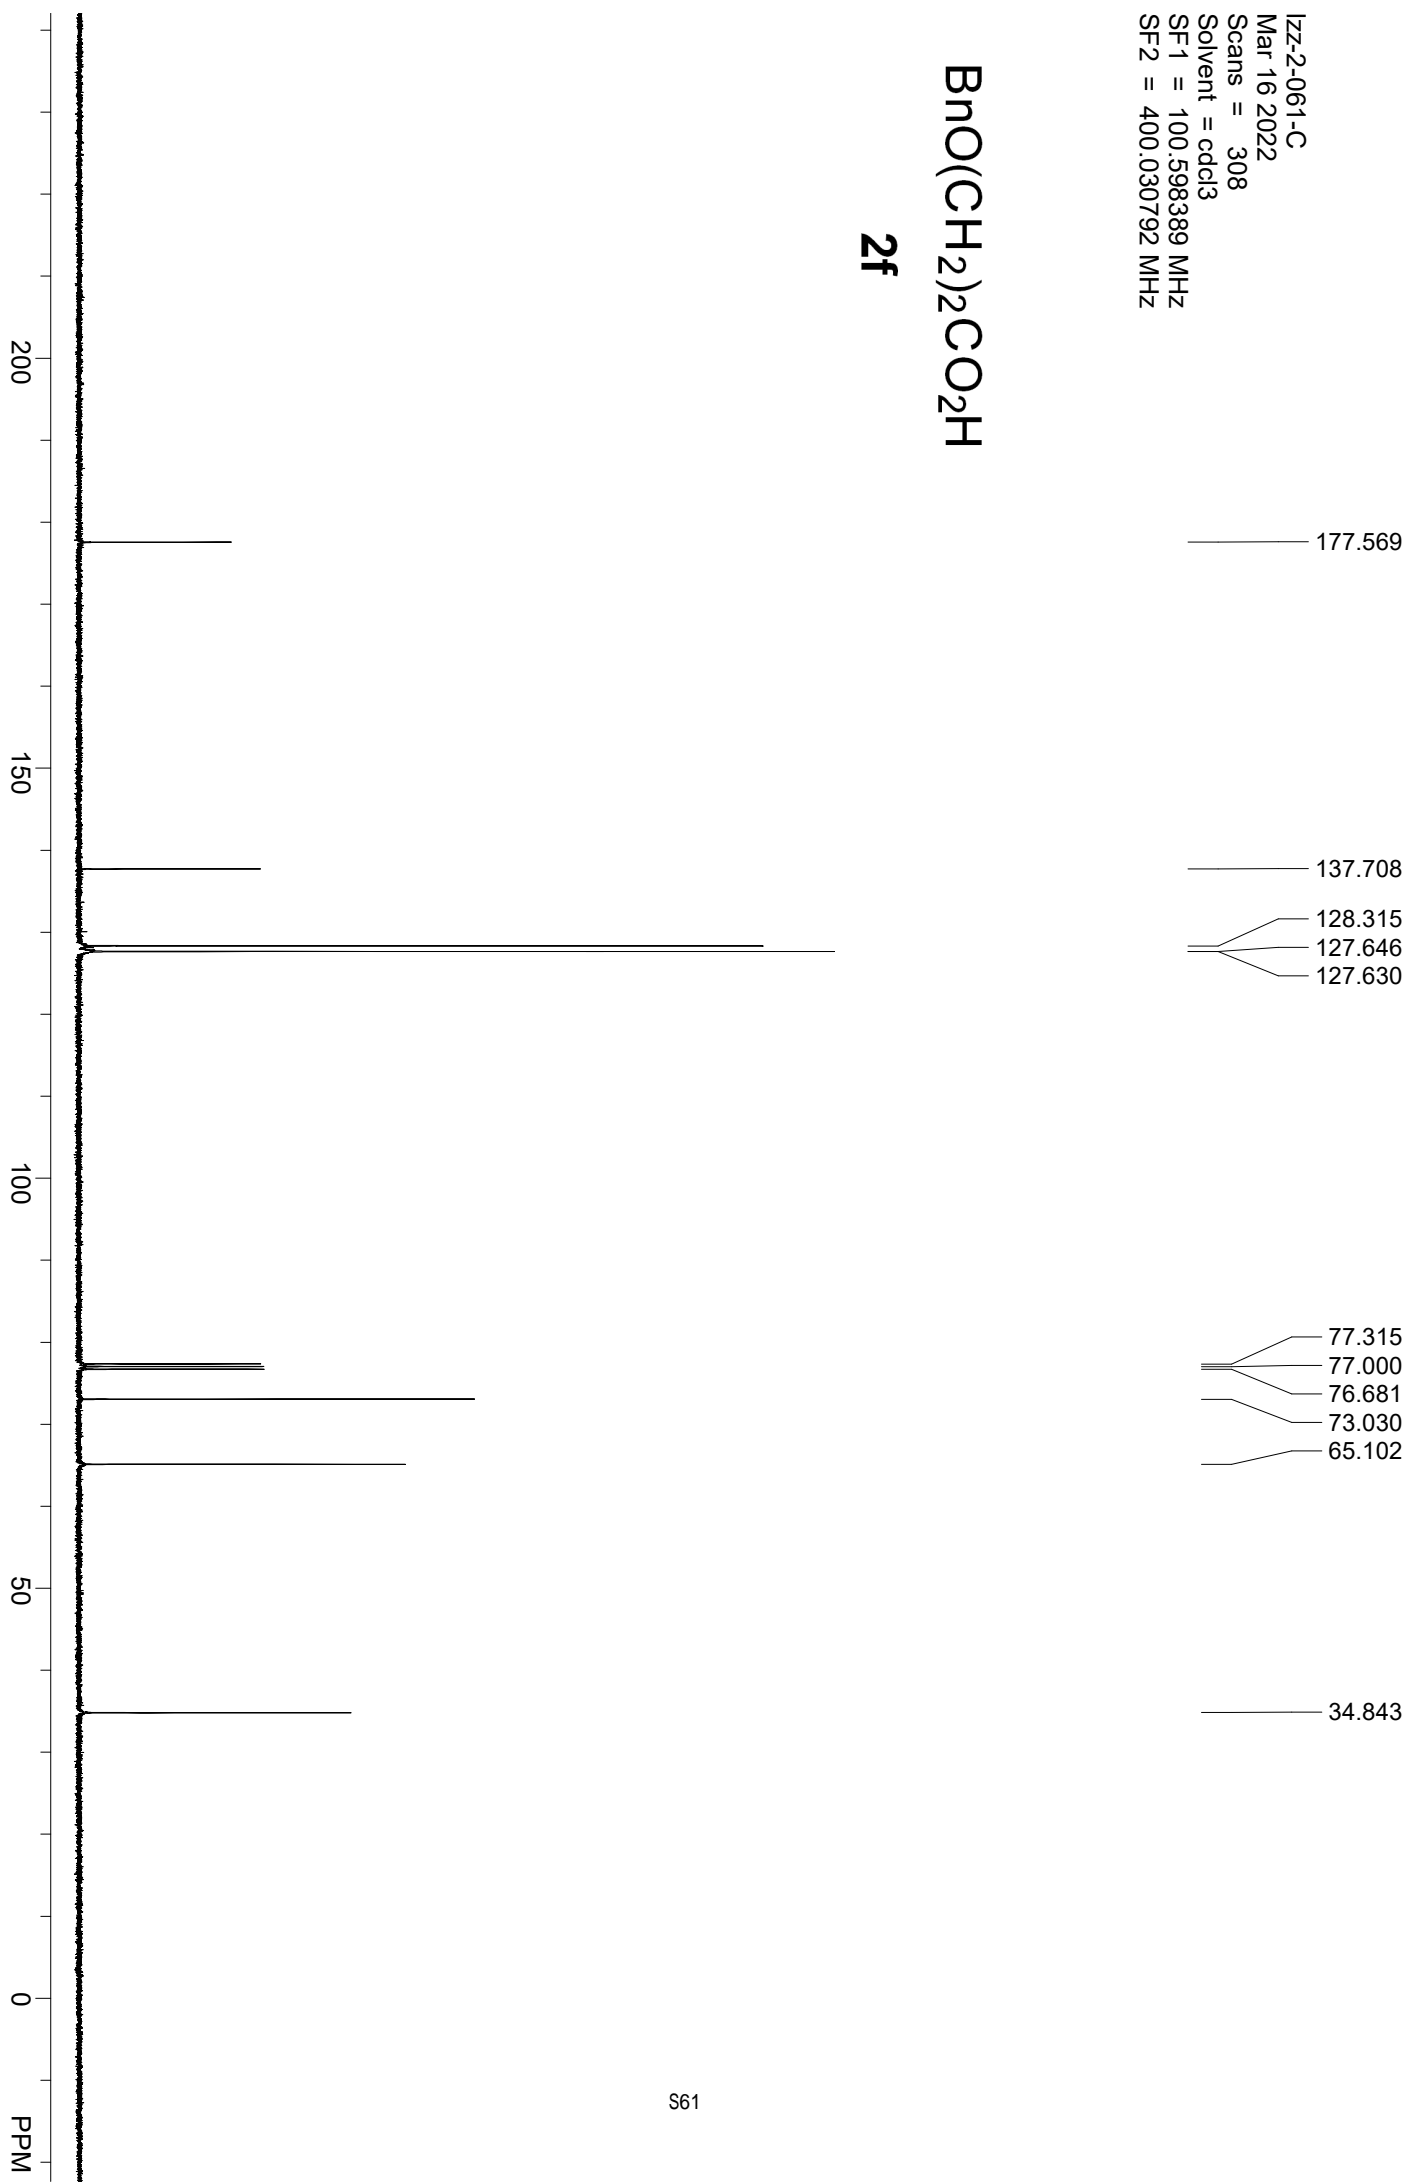

Izz-6-055-H  
Jan 7 2024  
Scans = 8  
Solvent = CDCl3  
SF1 = 399.718048 MHz  
SF2 = 100.517960 MHz

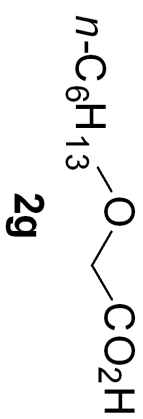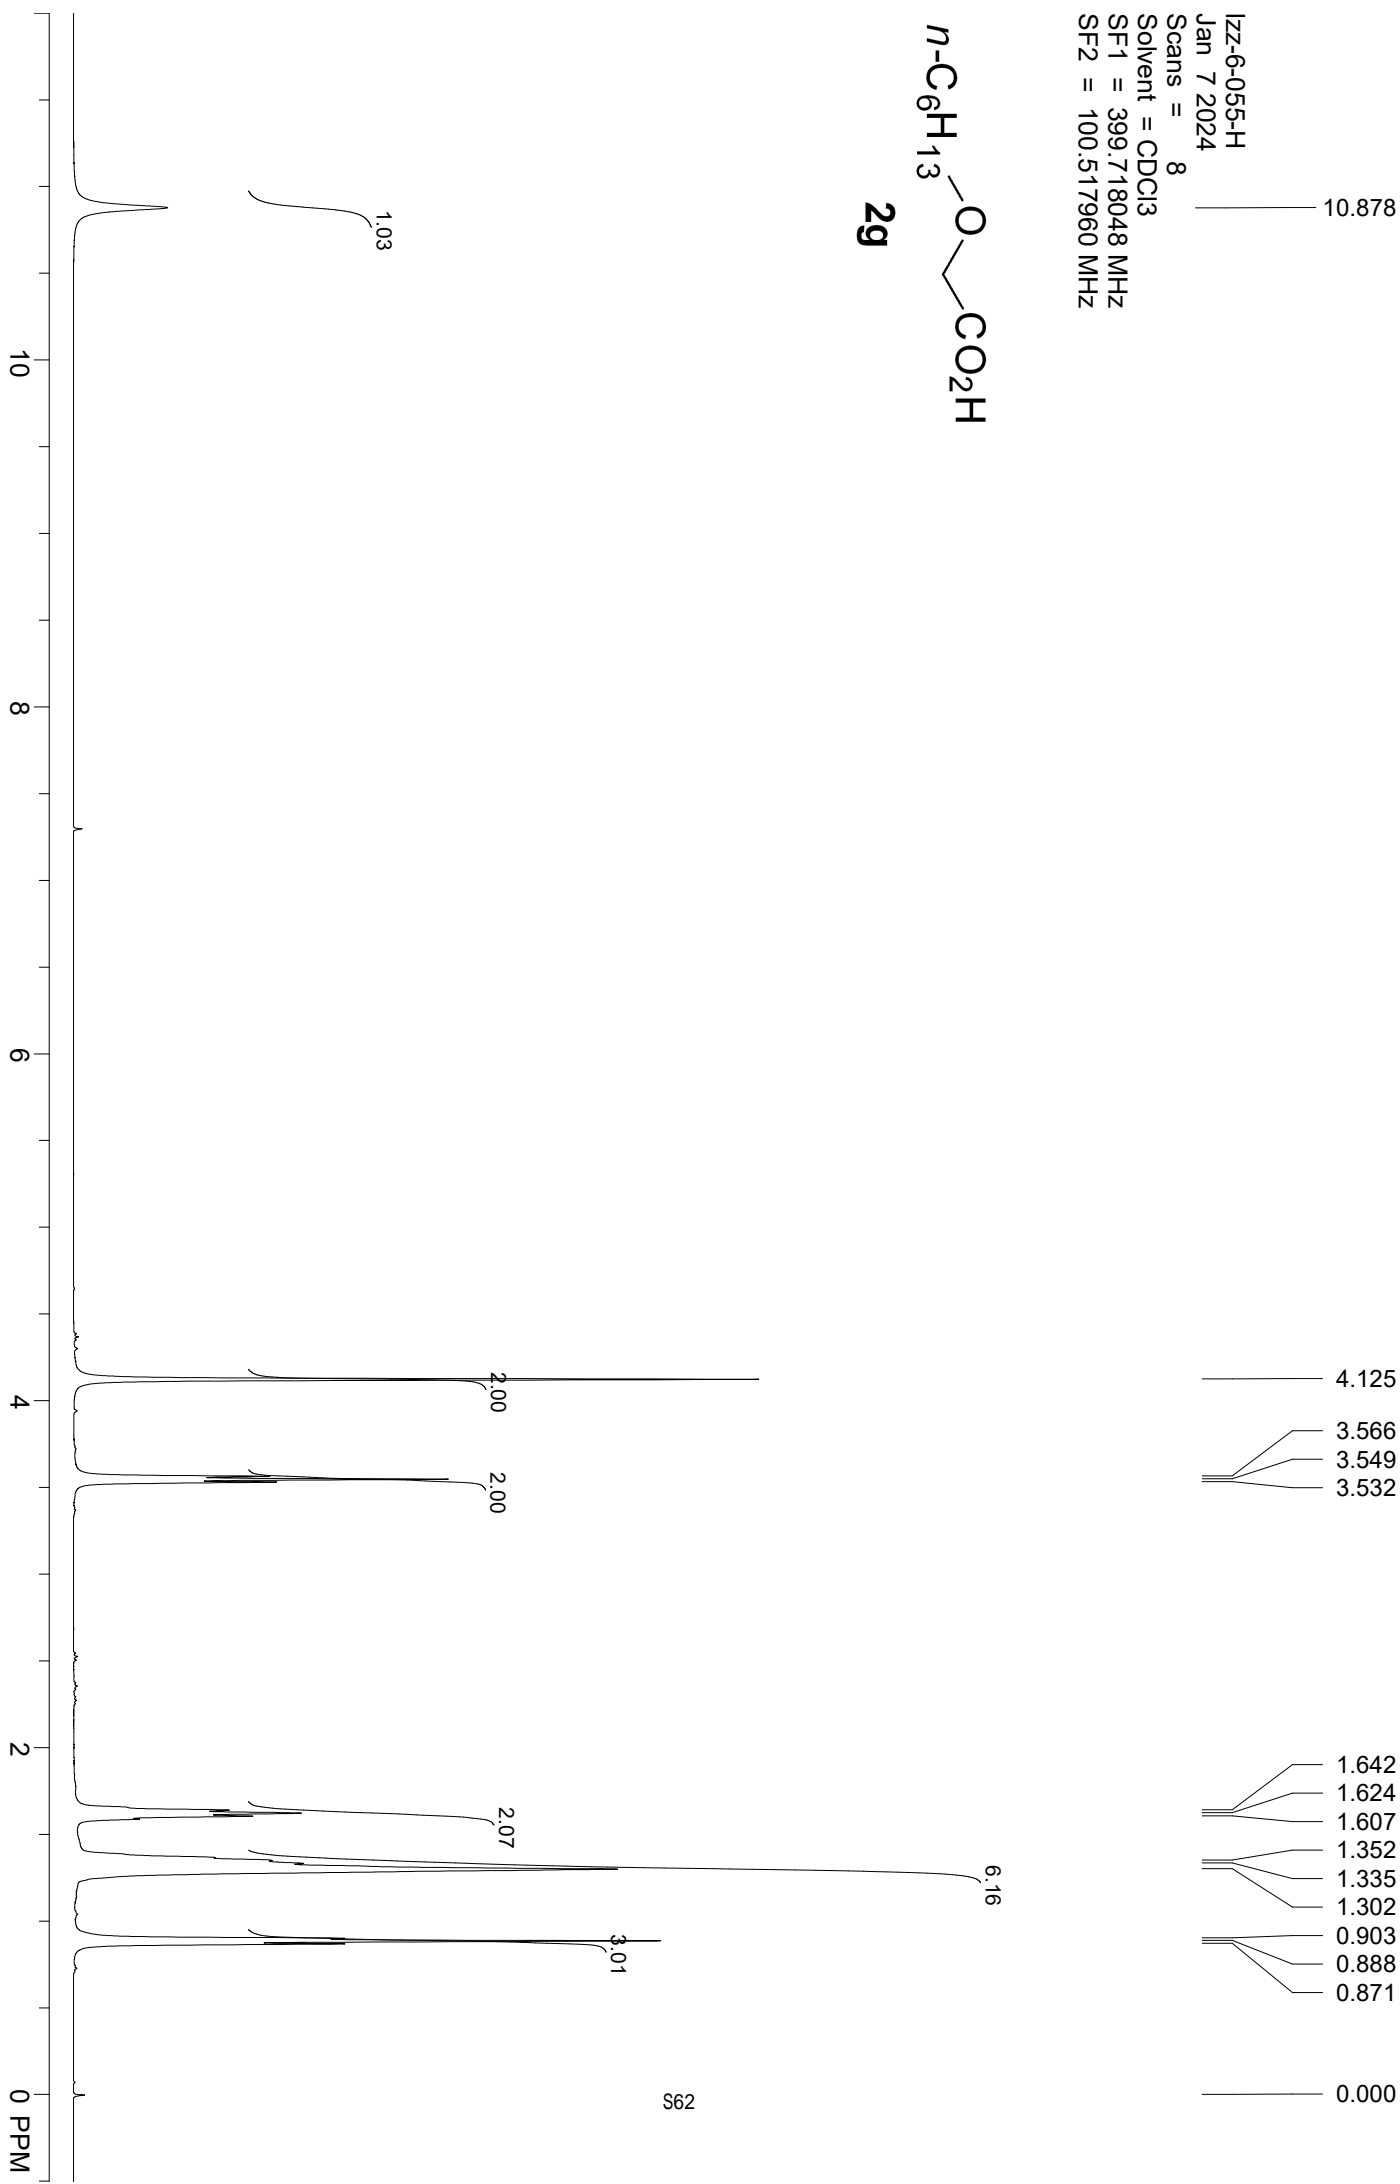

Izz-6-055-C  
Jan 7 2024  
Scans = 92  
Solvent = cdcl3  
SF1 = 100.519485 MHz  
SF2 = 399.717072 MHz

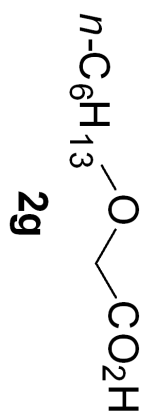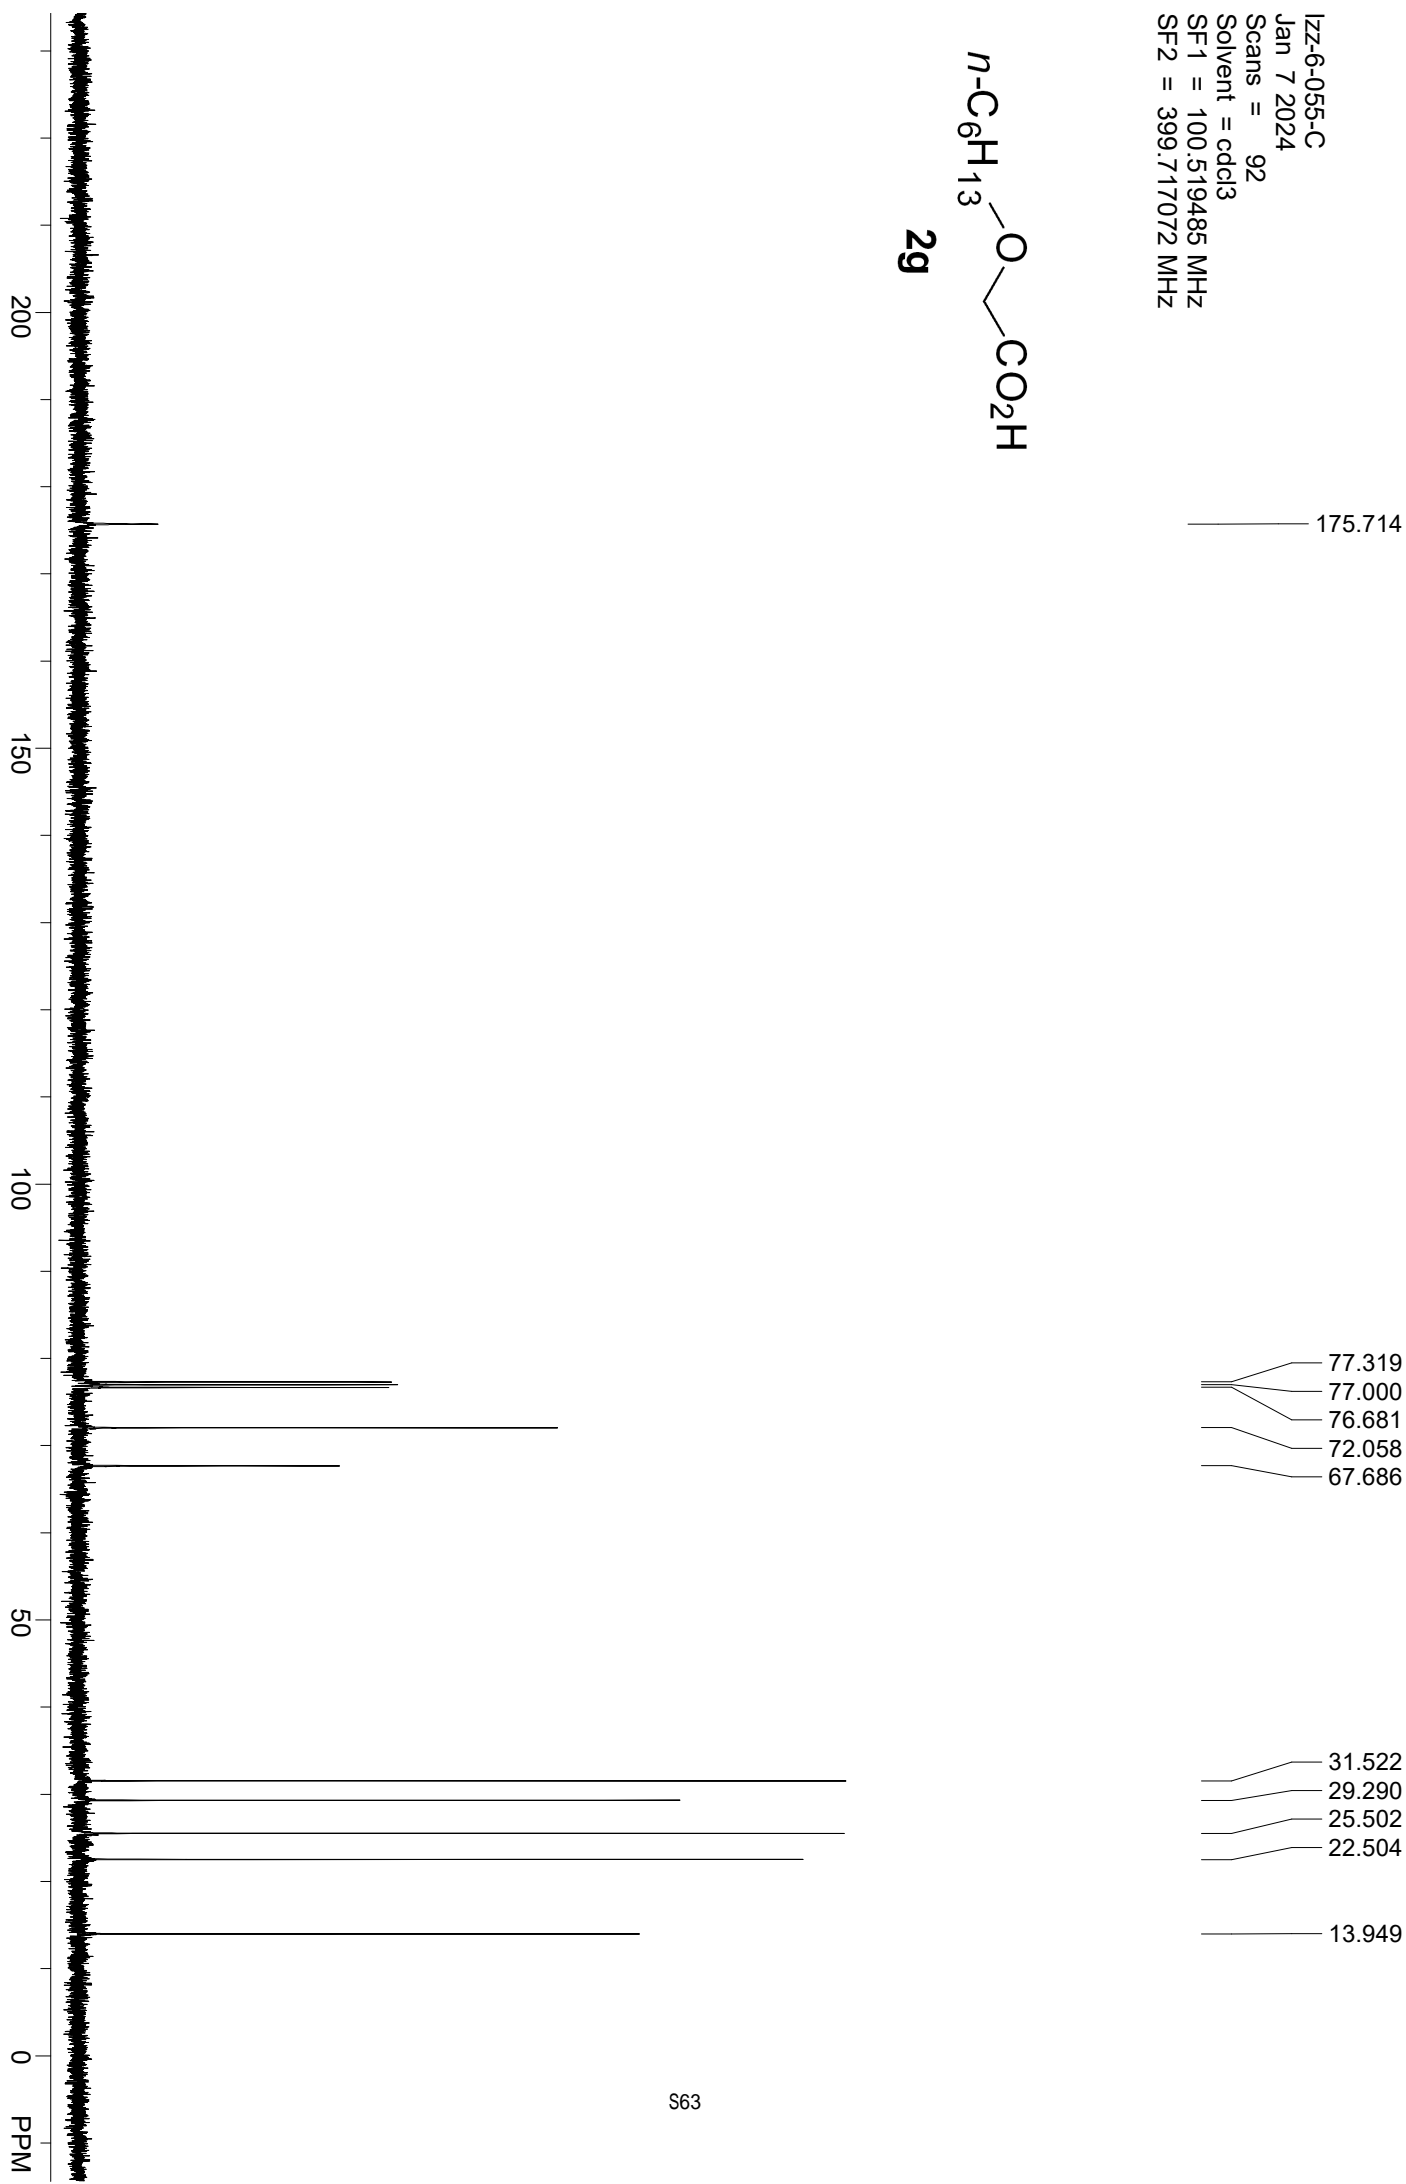

IZZ-6-056-H  
Jan 8 2024  
Scans = 8  
Solvent = cd3od  
SF1 = 399.719025 MHz  
SF2 = 100.518356 MHz

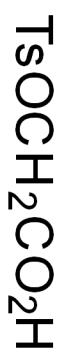

**2h**

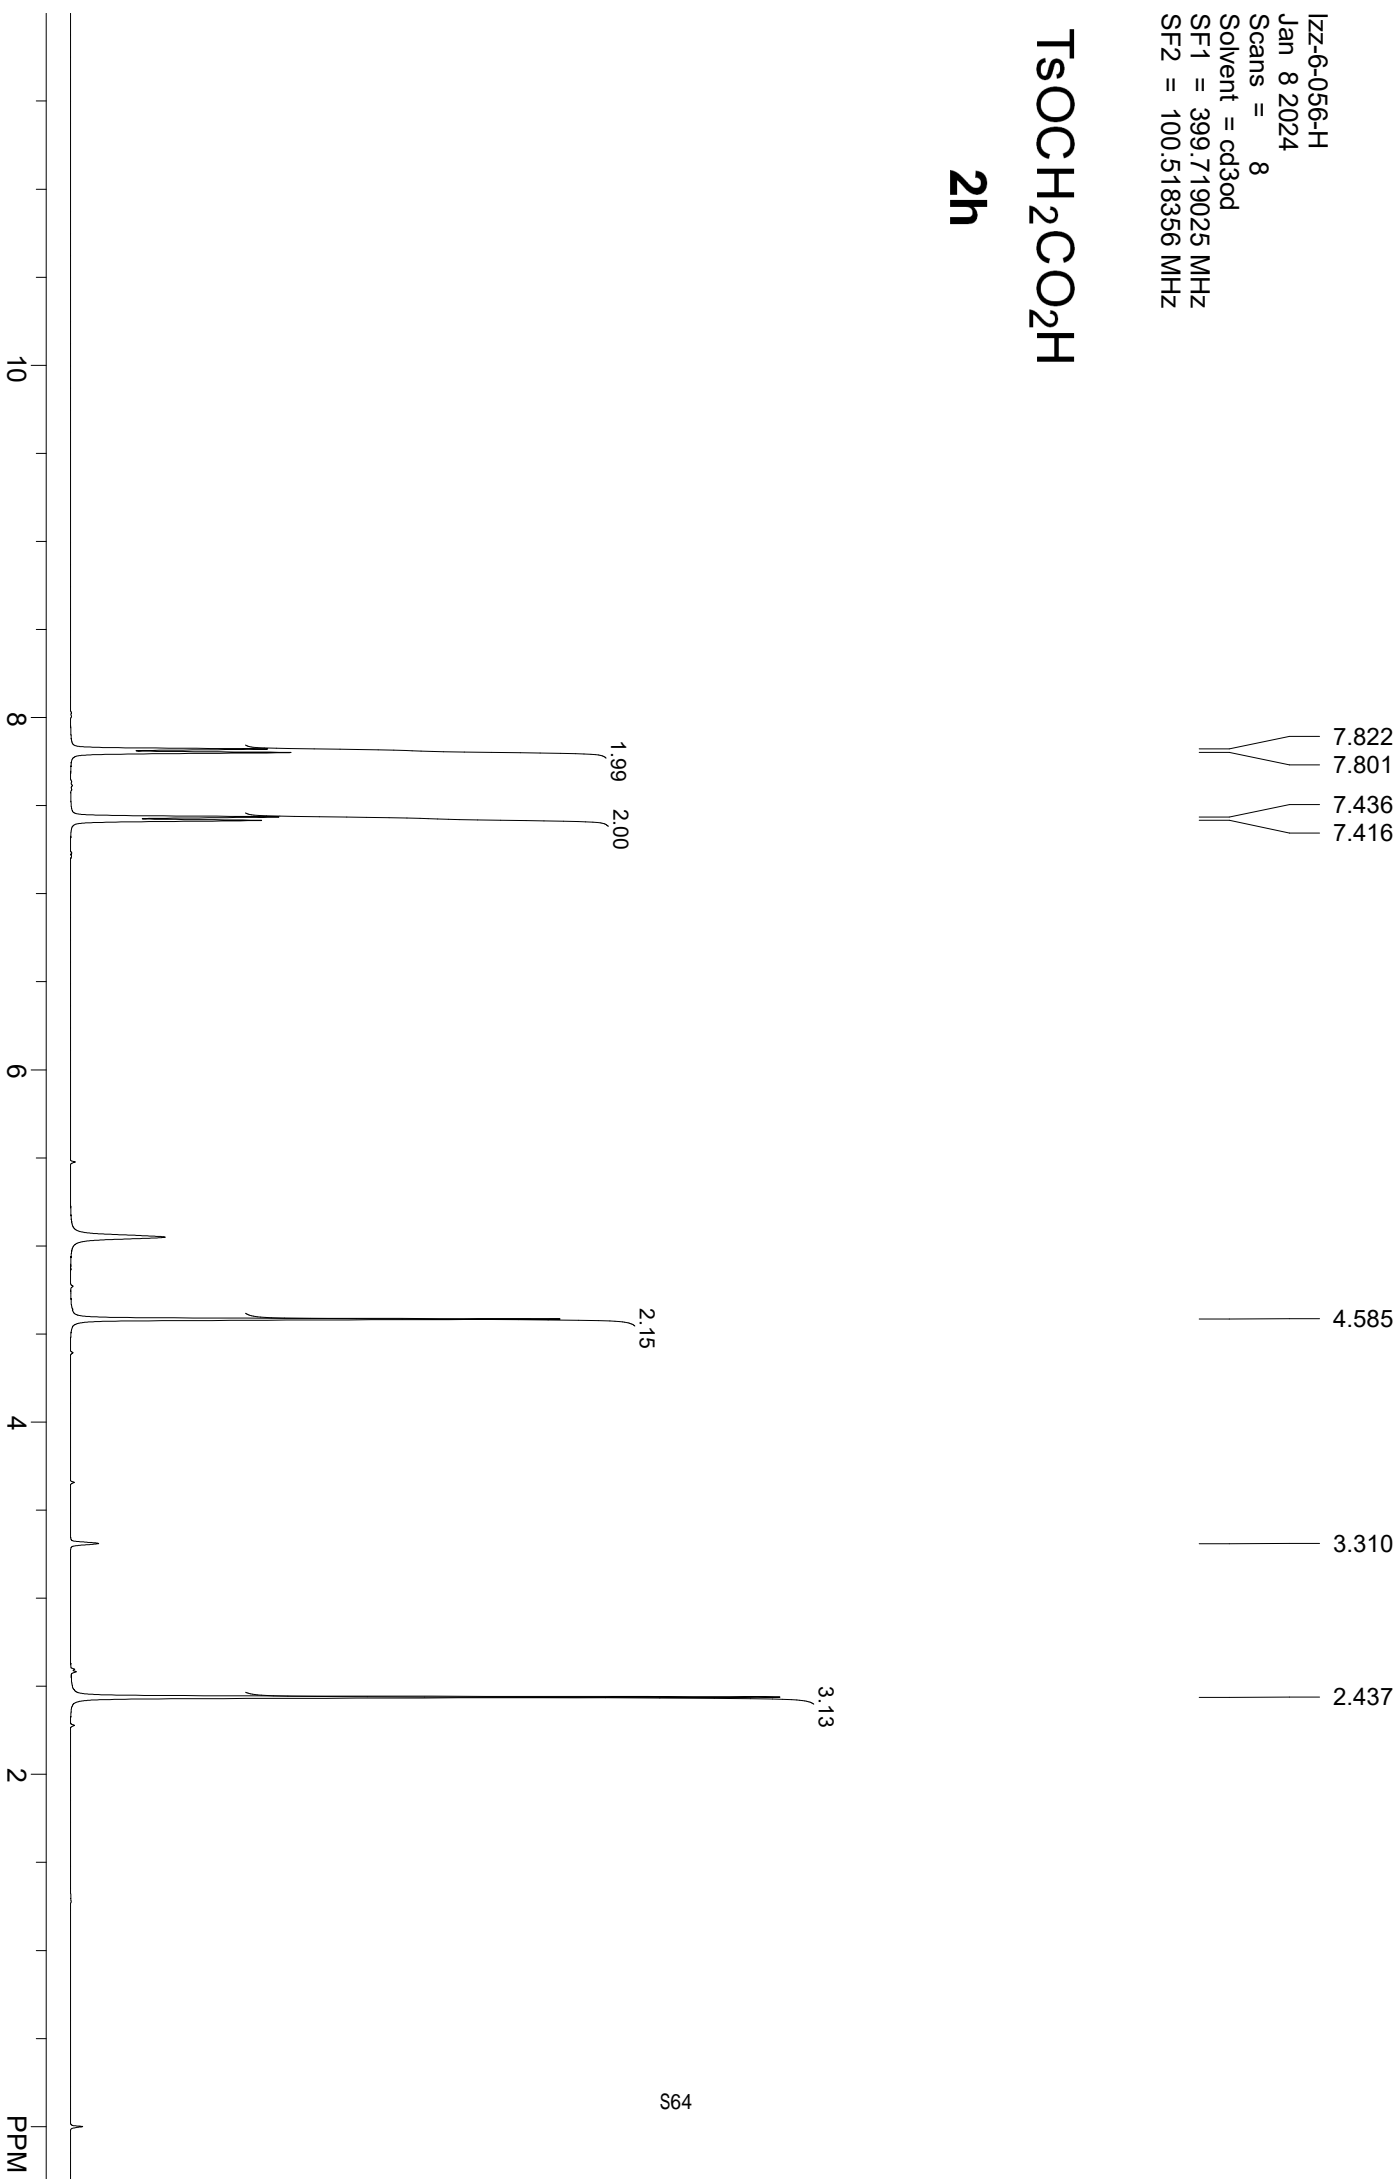



Izz-6-056-C  
Jan 11 2024  
Scans = 472  
Solvent = cd3od  
SF1 = 100.519882 MHz  
SF2 = 399.718628 MHz

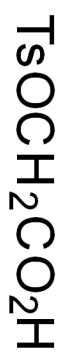

**2h**

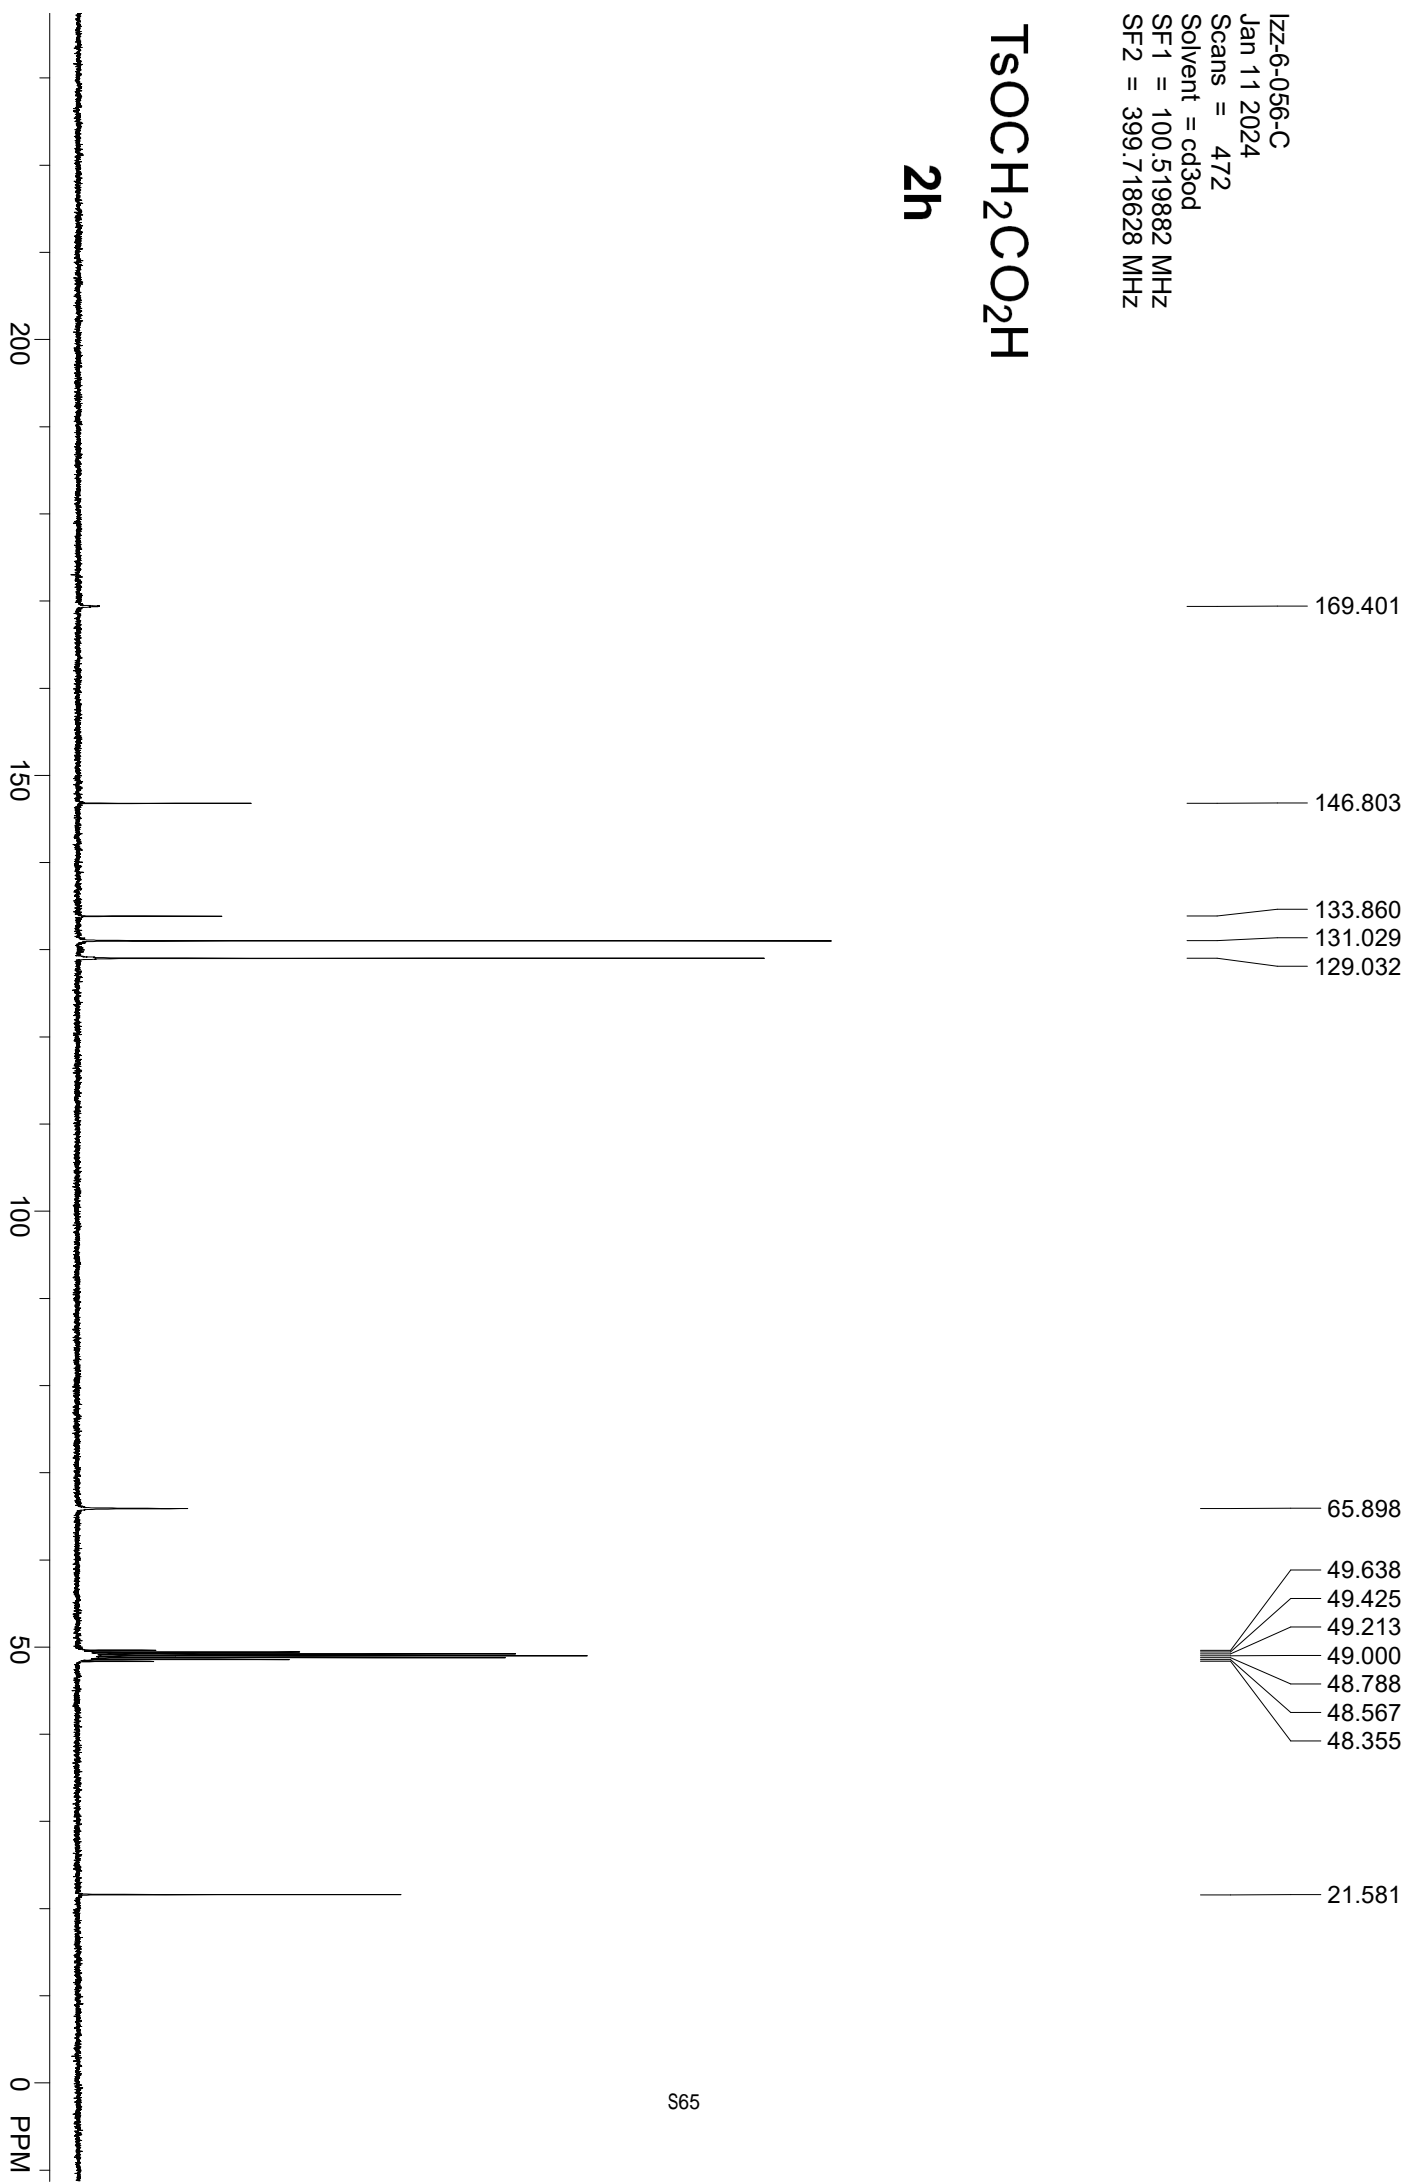

lzz-6-056-test  
purity = 97%  
10.0 mg of product with 5.0\*10<sup>-6</sup> L dibromomethane  
Jan 8 2024  
Scans = 4  
Solvent = cdcl3  
SF1 = 399.717651 MHz  
SF2 = 100.517960 MHz

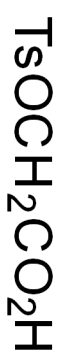

**2h**

$$\text{purity} = \frac{5.0 \times 2.477}{173.83} \times \frac{2}{2} \times 0.59 \times 230.23 \div 10.0 \approx 97\%$$

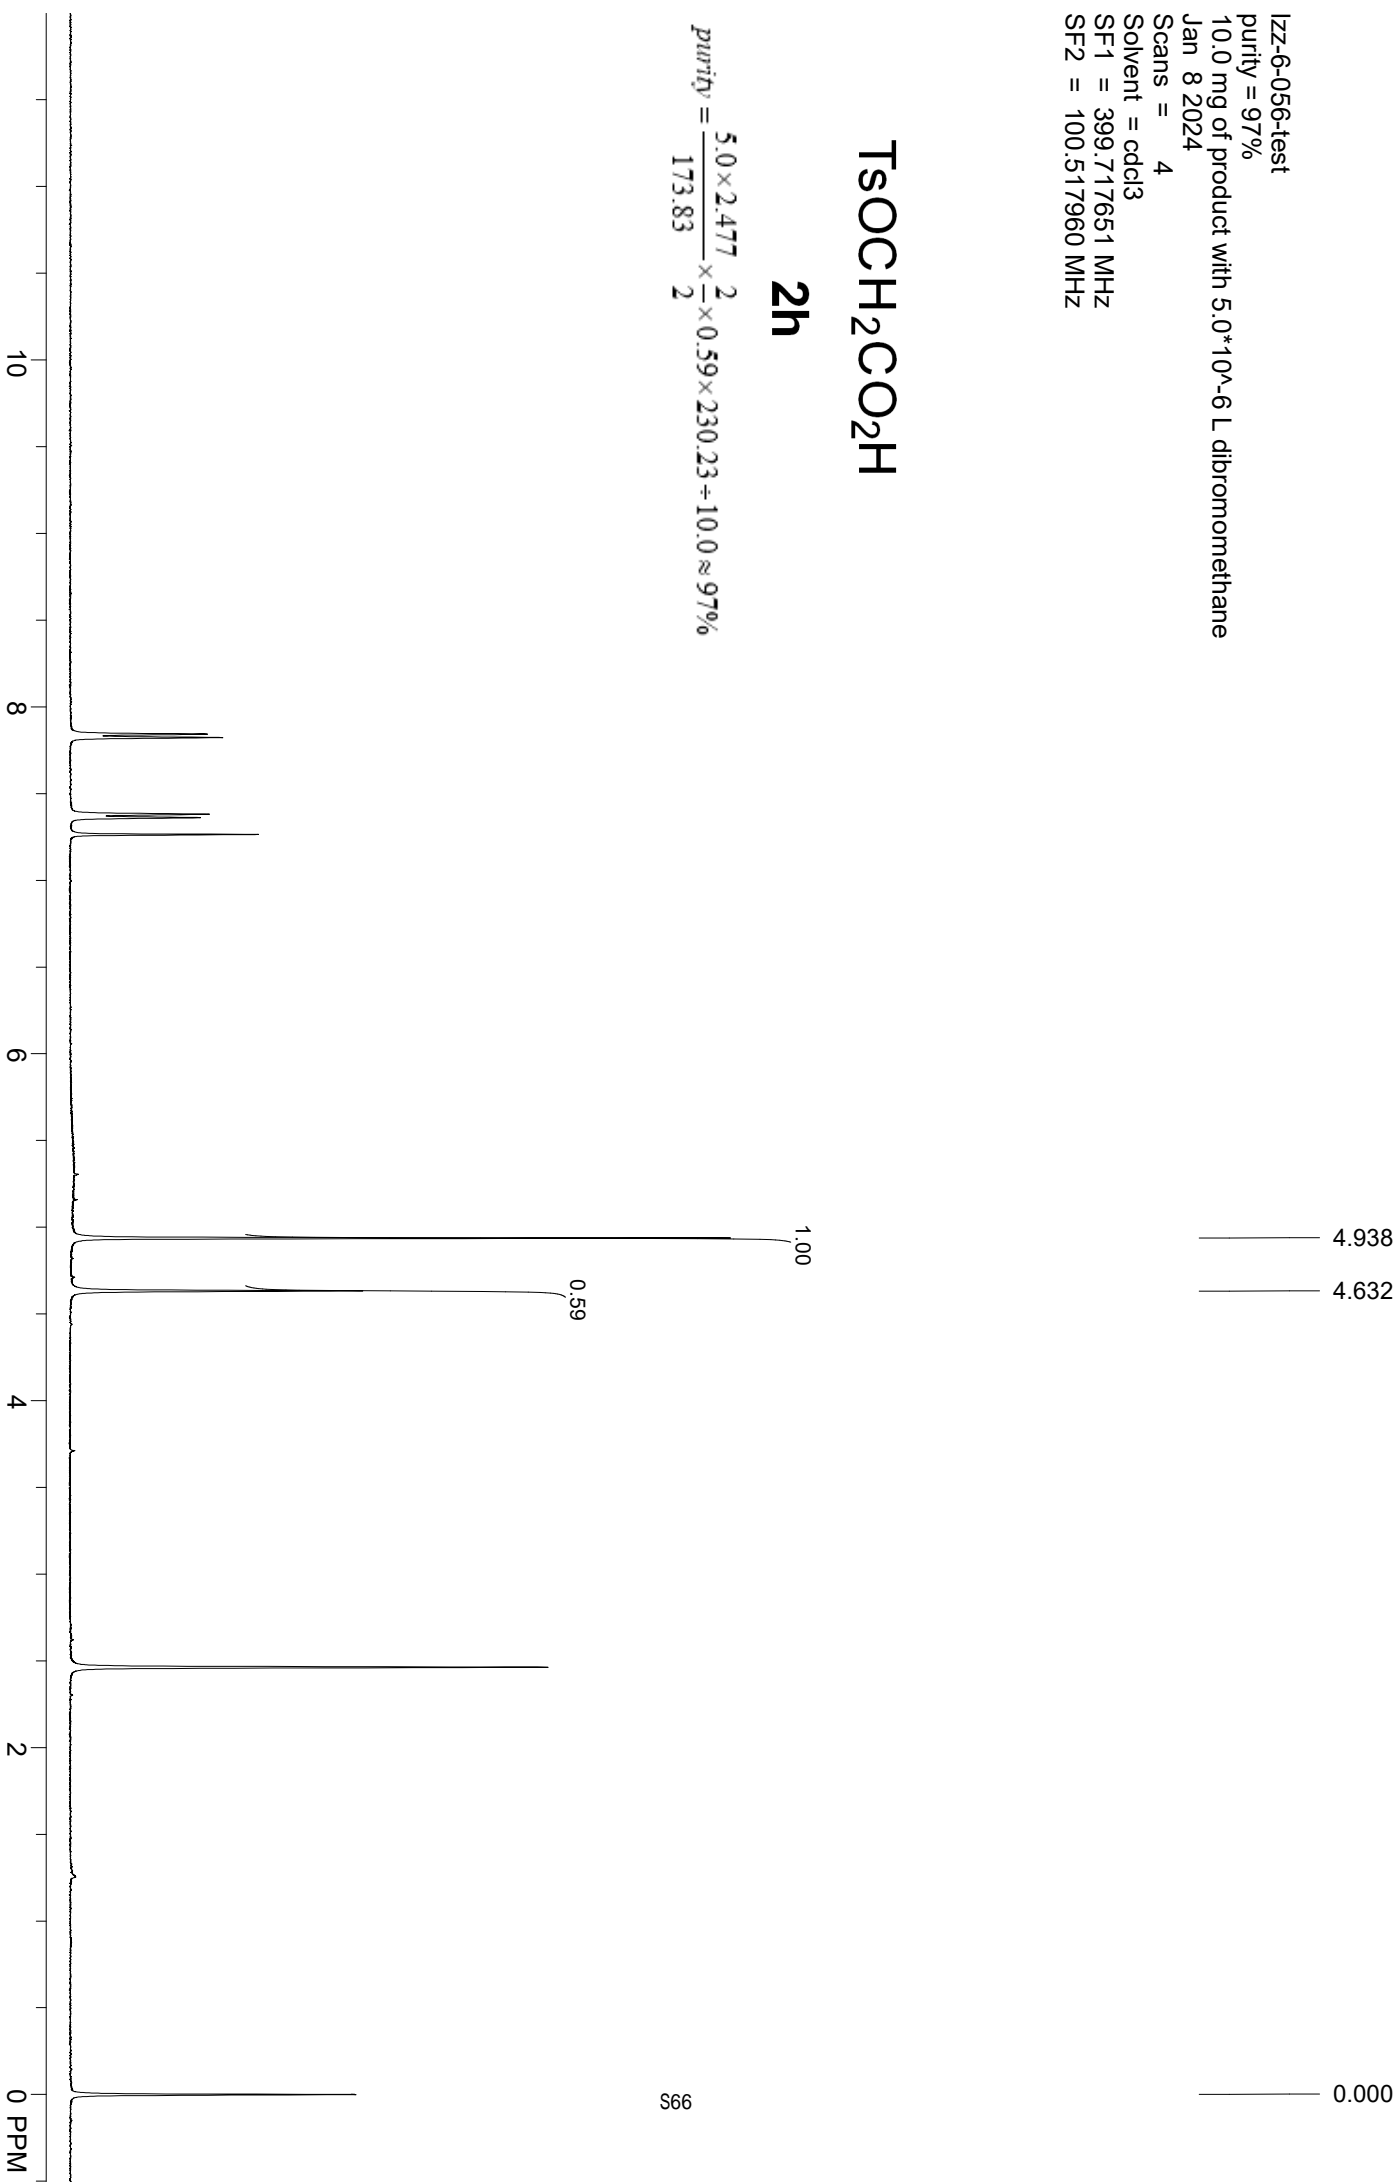

Izz-6-060-H  
Jan 9 2024  
Scans = 8  
Solvent = CDCl3  
SF1 = 399.718048 MHz  
SF2 = 100.517960 MHz

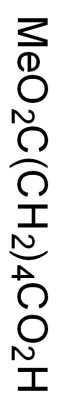

2i

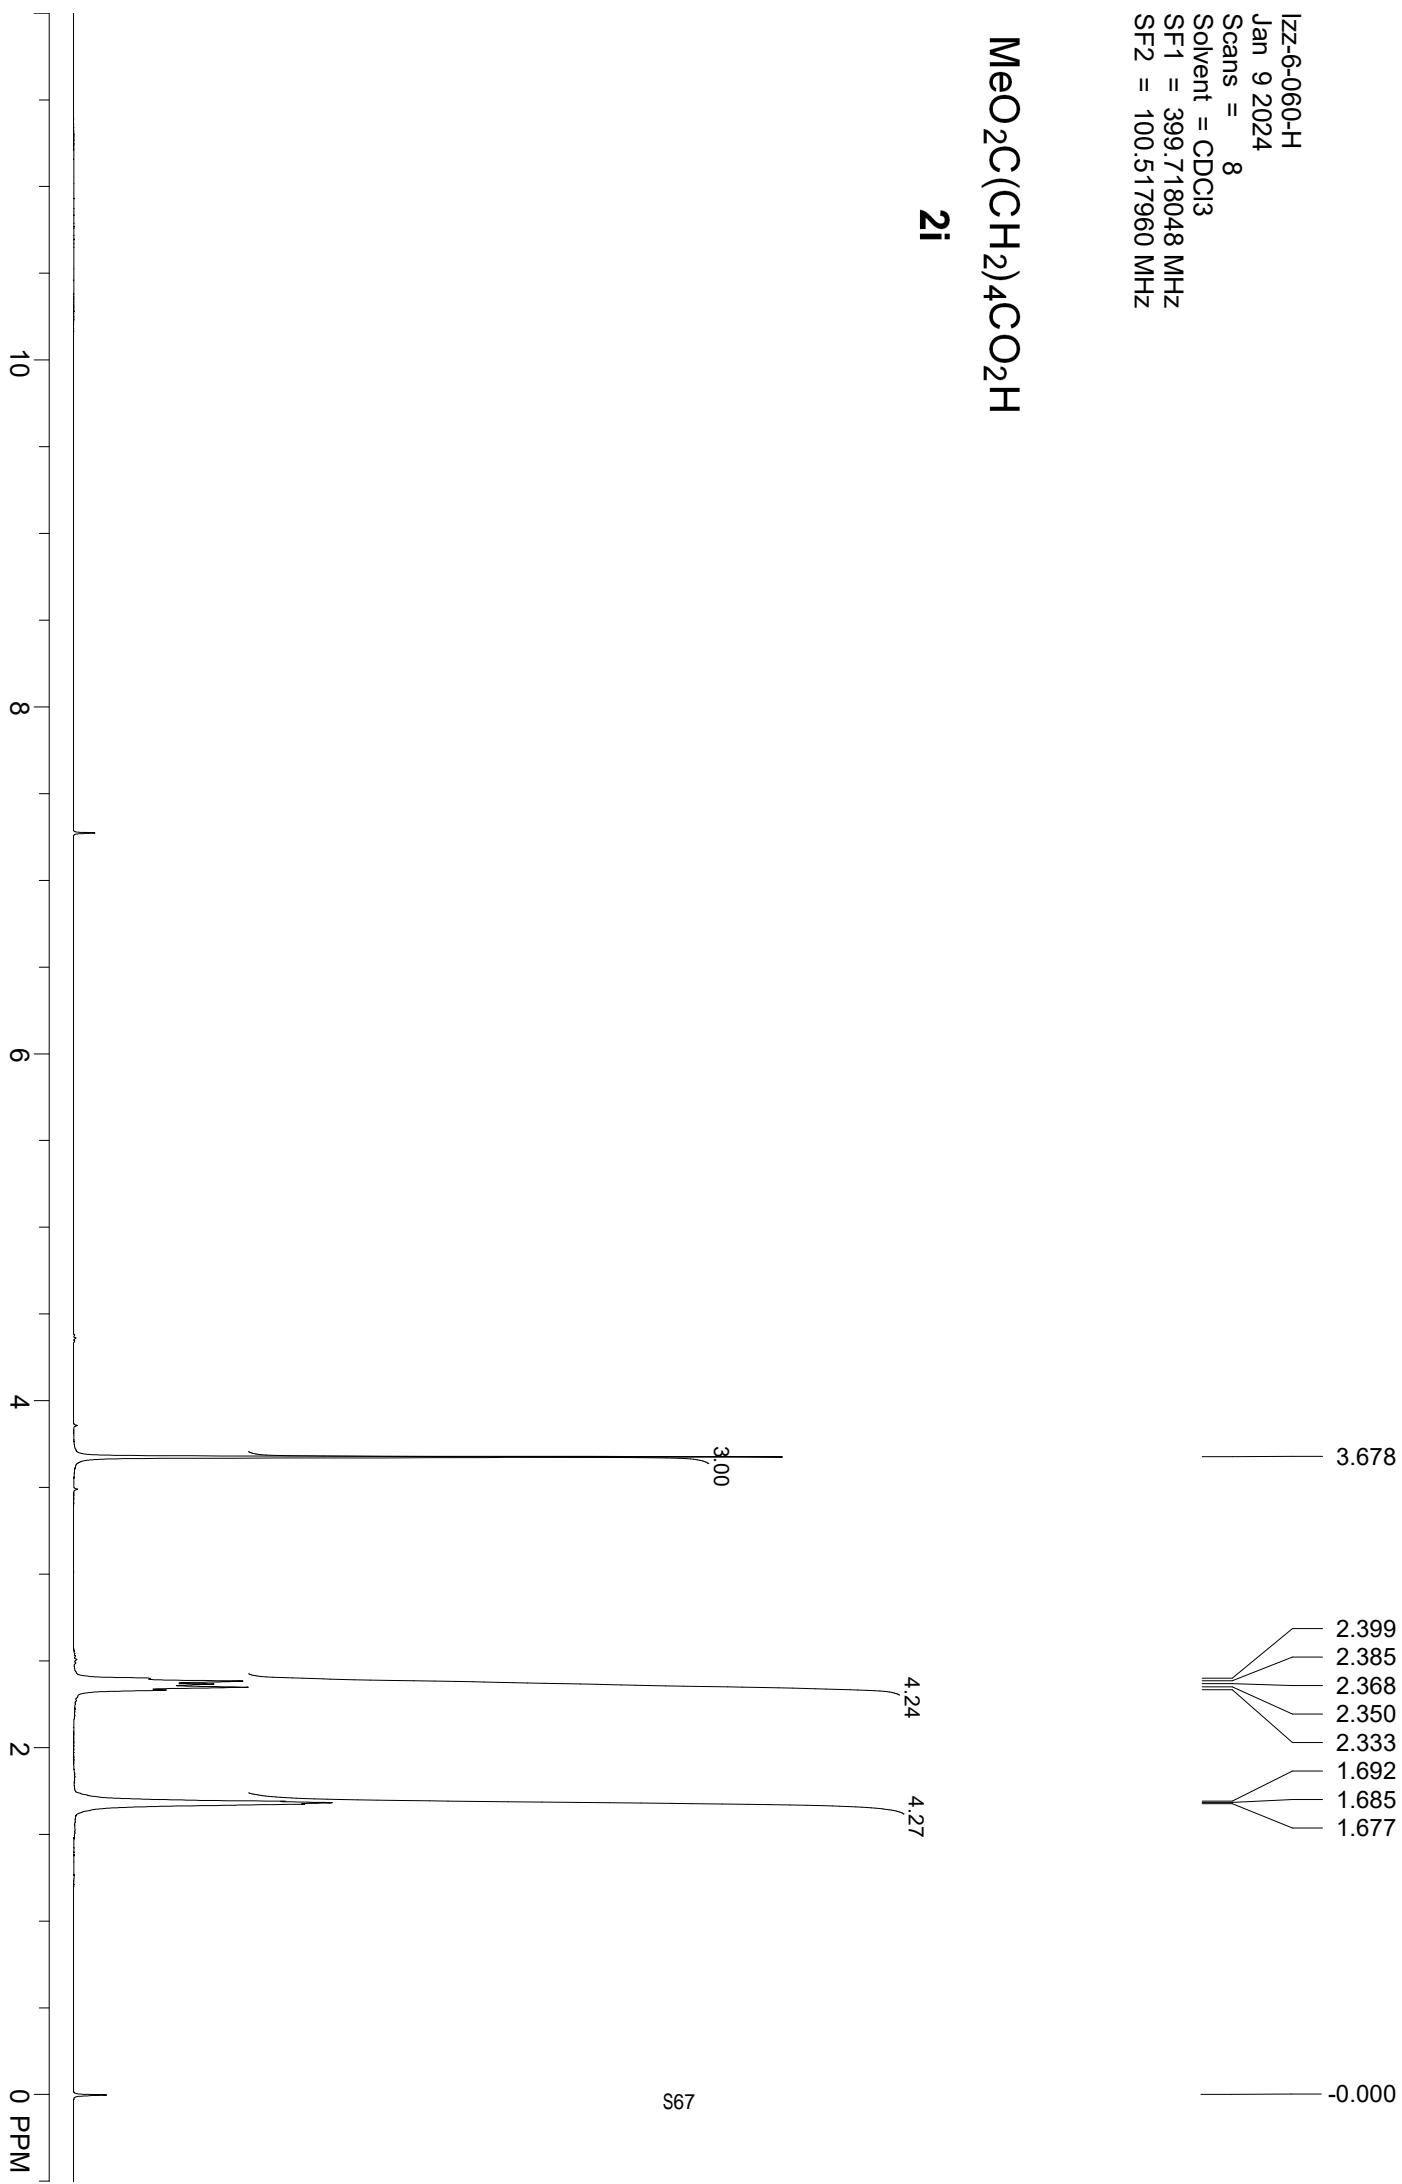

lzz-6-060-C  
Jan 9 2024  
Scans = 40  
Solvent = cdcl3  
SF1 = 100.519485 MHz  
SF2 = 399.717072 MHz

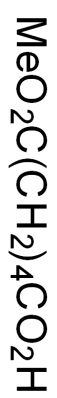

2i

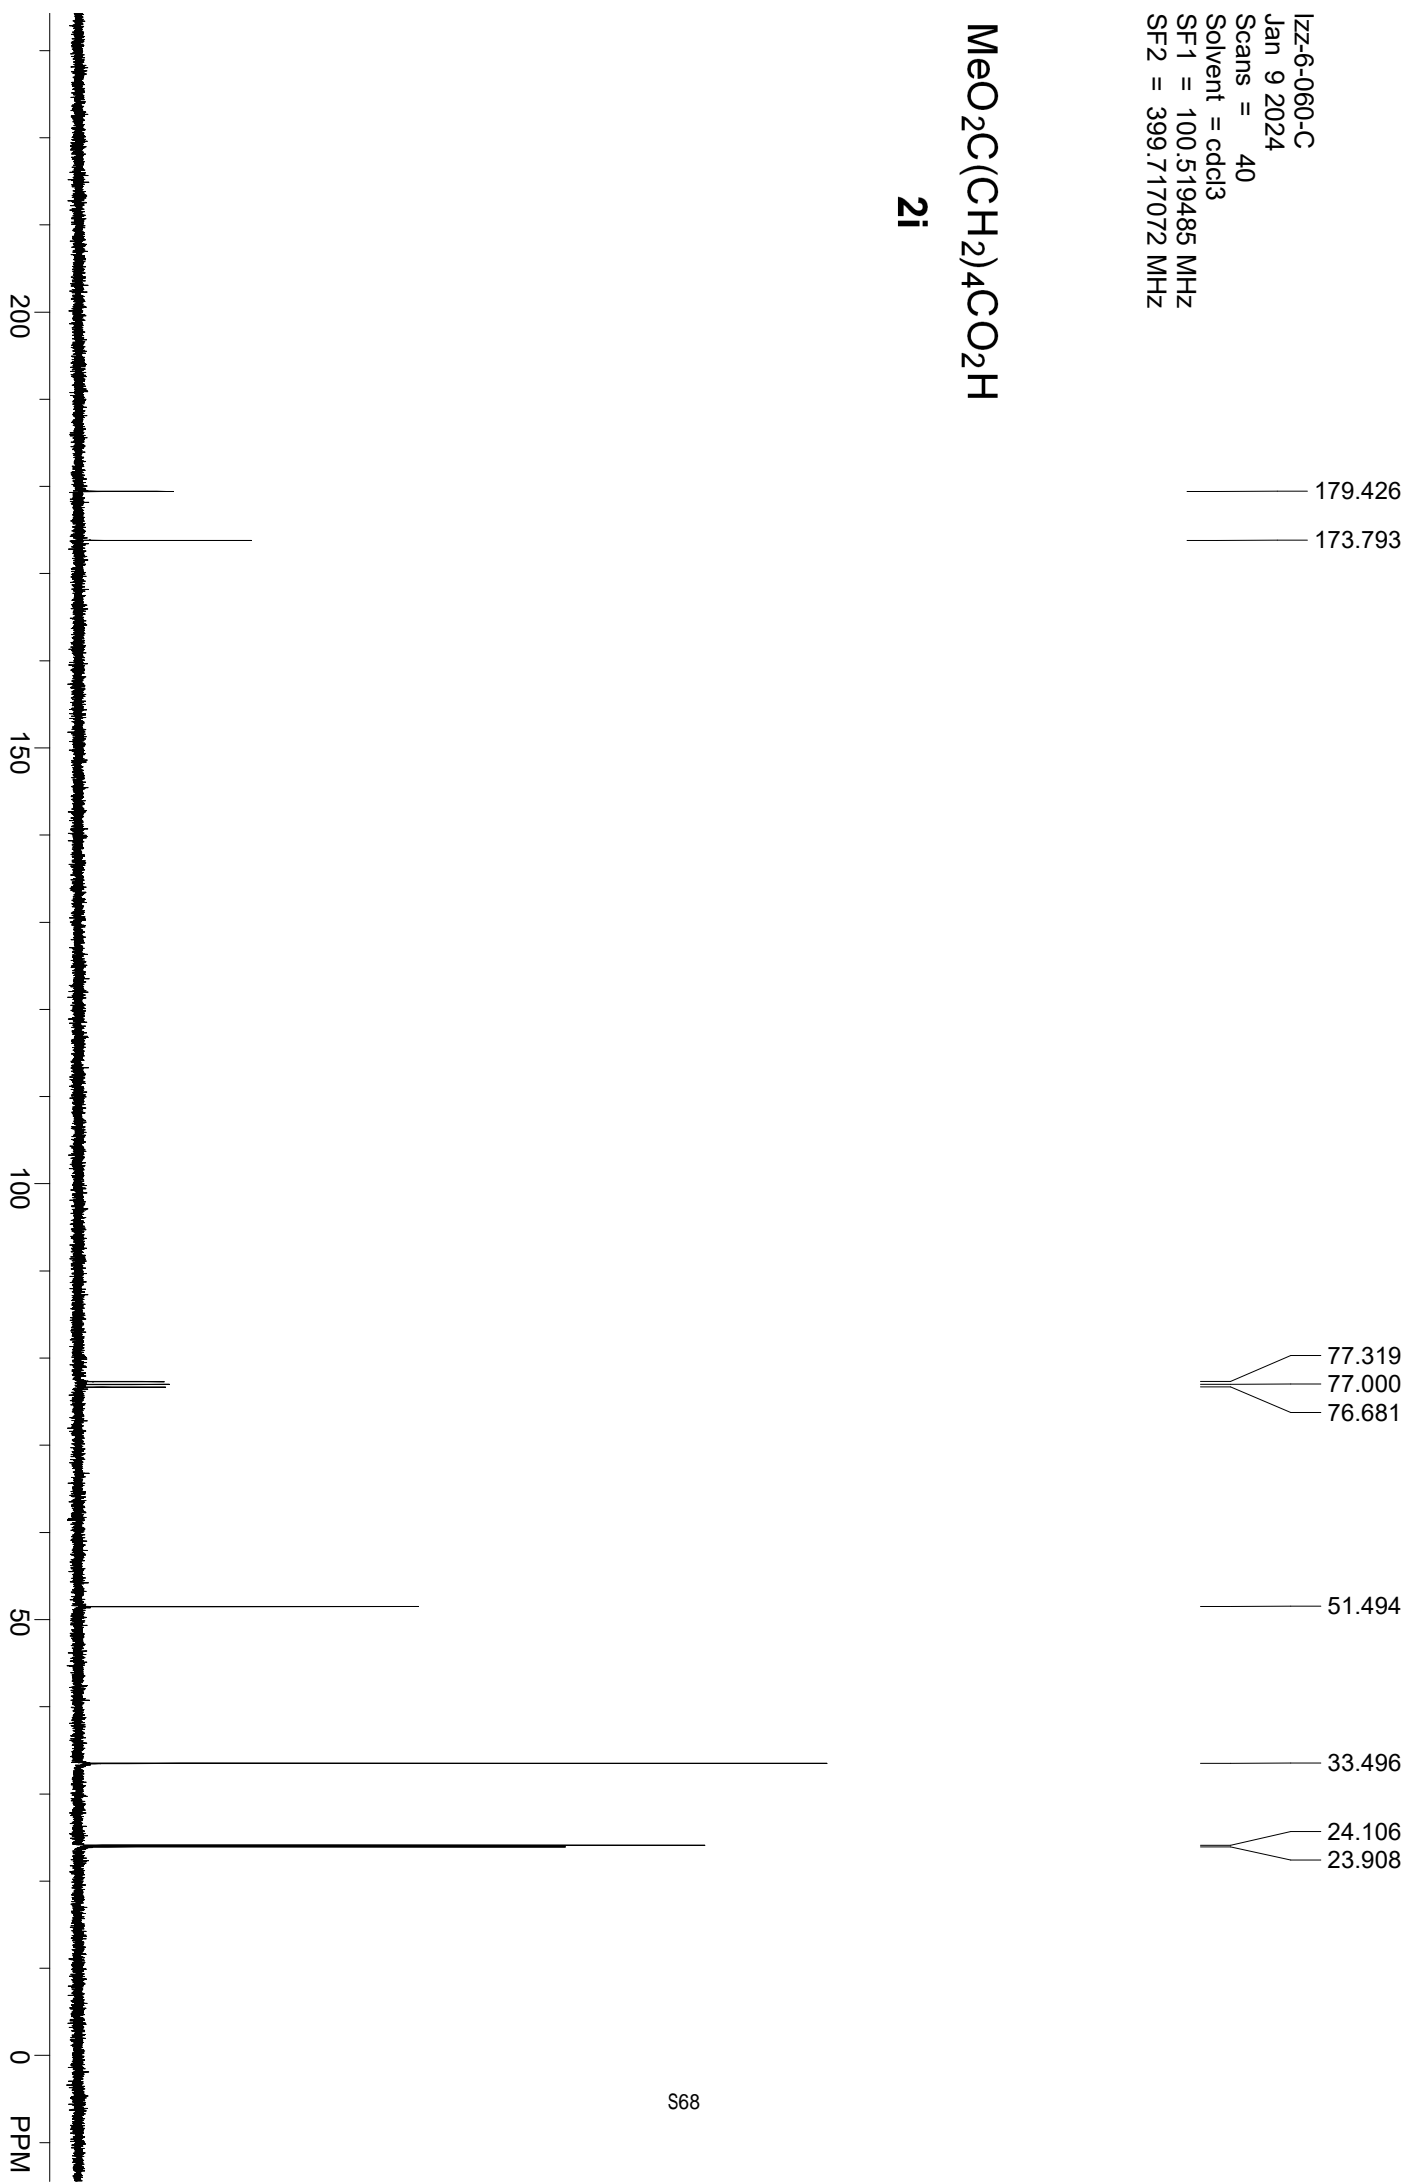

Izz-2-064-H  
Mar 17 2022  
Scans = 4  
Solvent = CDCl3  
SF1 = 400.031799 MHz  
SF2 = 100.596855 MHz

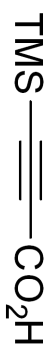

2j

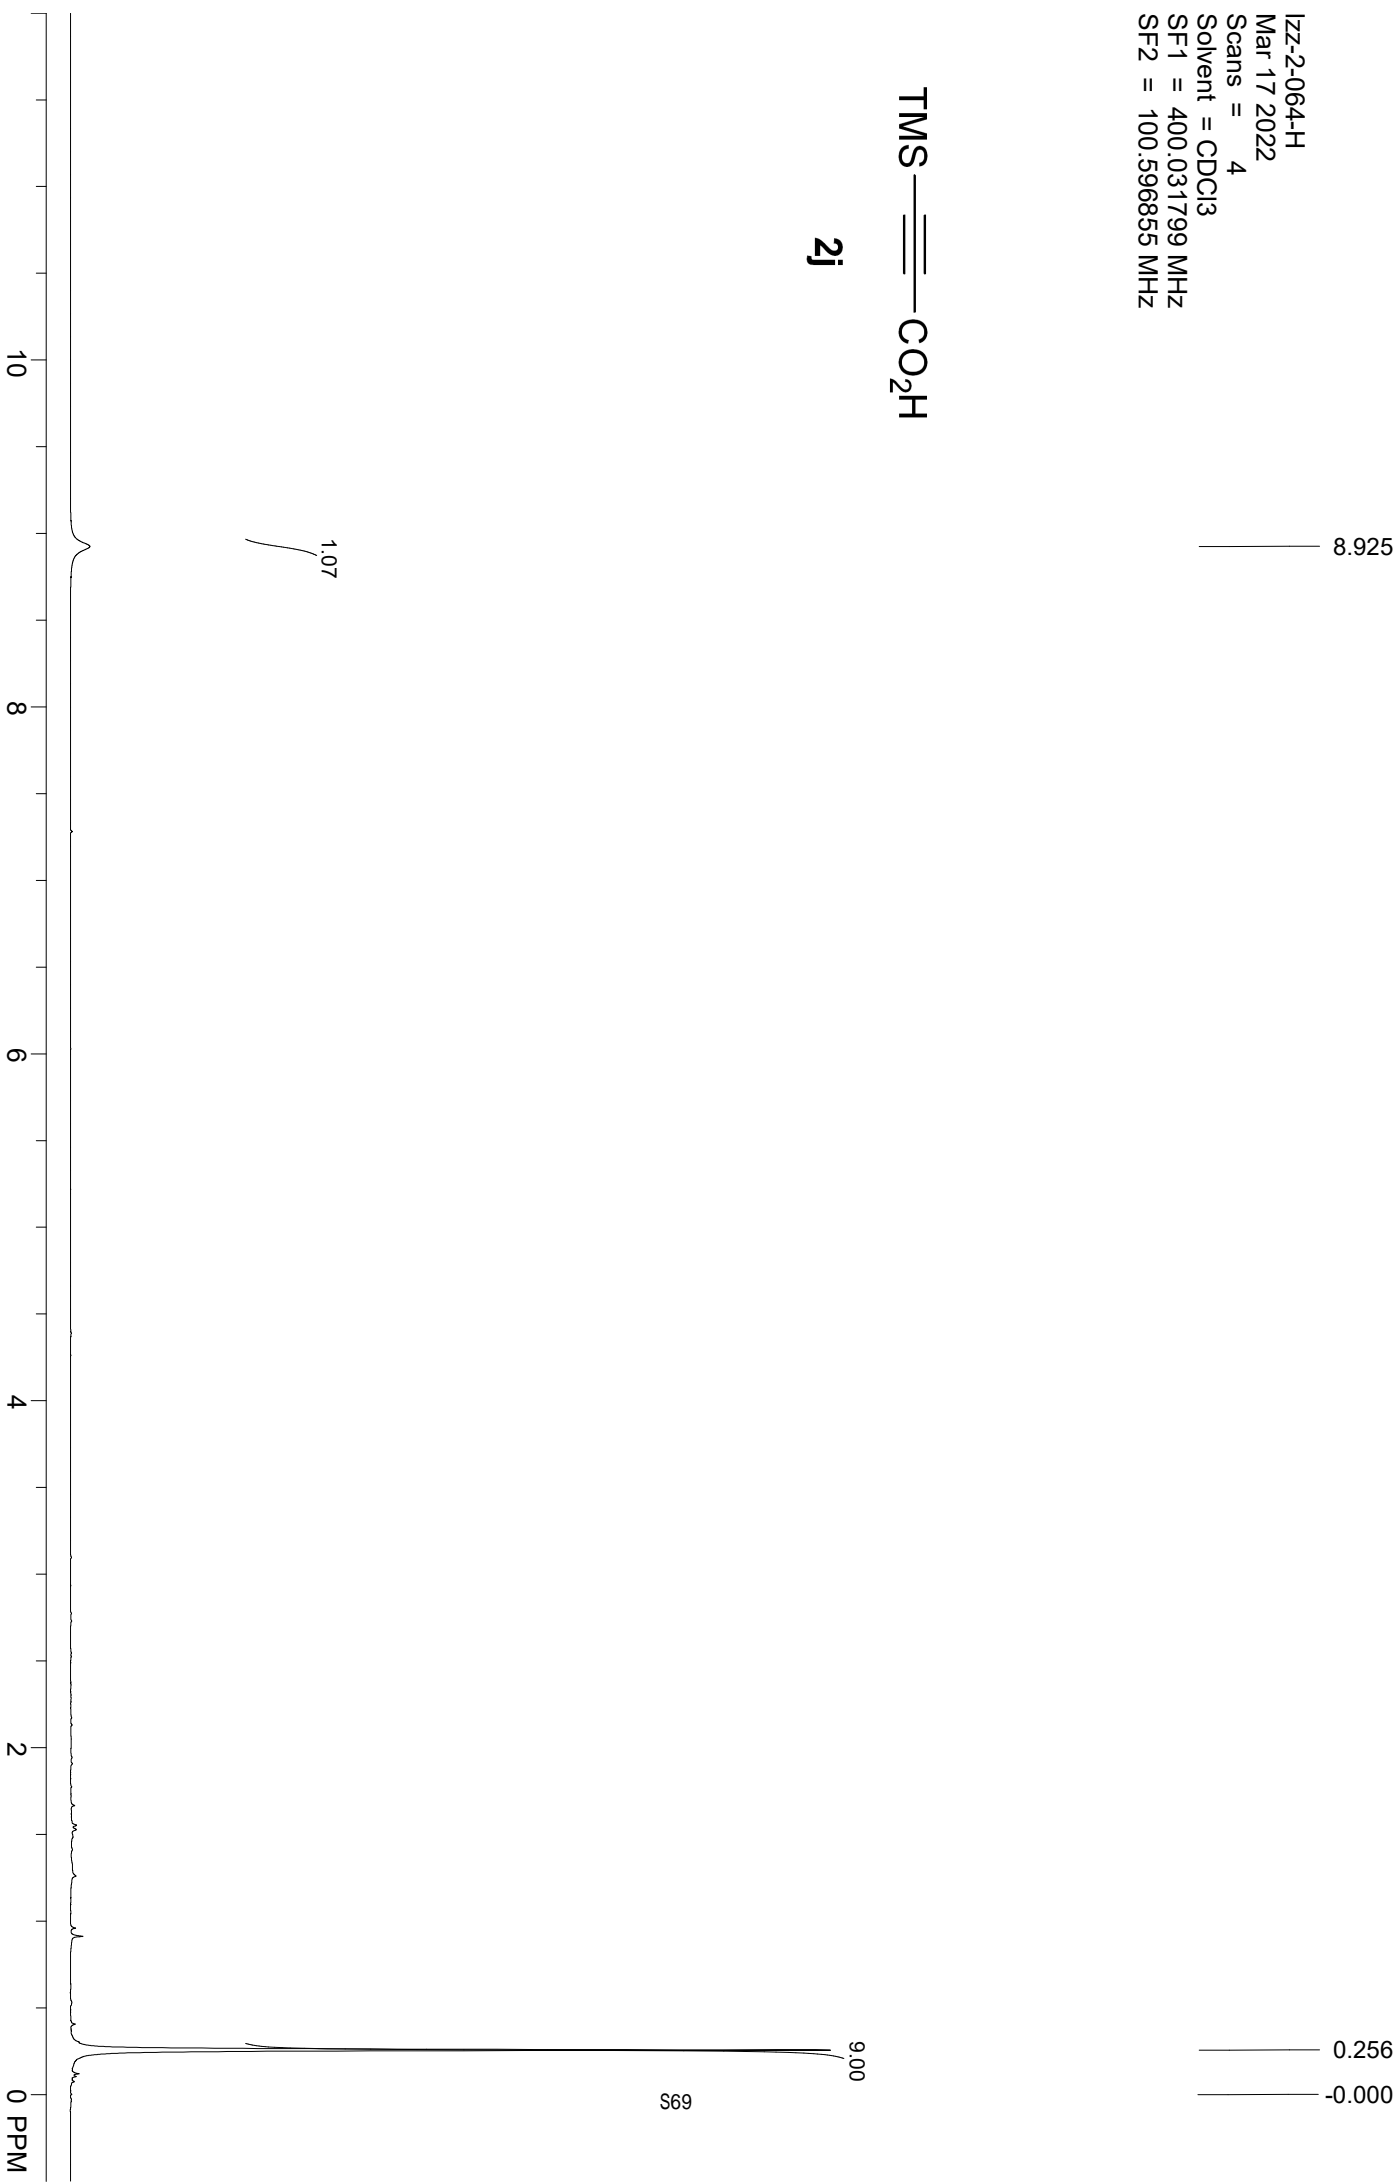

Izz-2-064-C  
Mar 17 2022  
Scans = 52  
Solvent = cdcl3  
SF1 = 100.598389 MHz  
SF2 = 400.030792 MHz

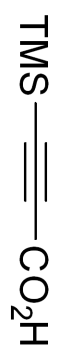

2j

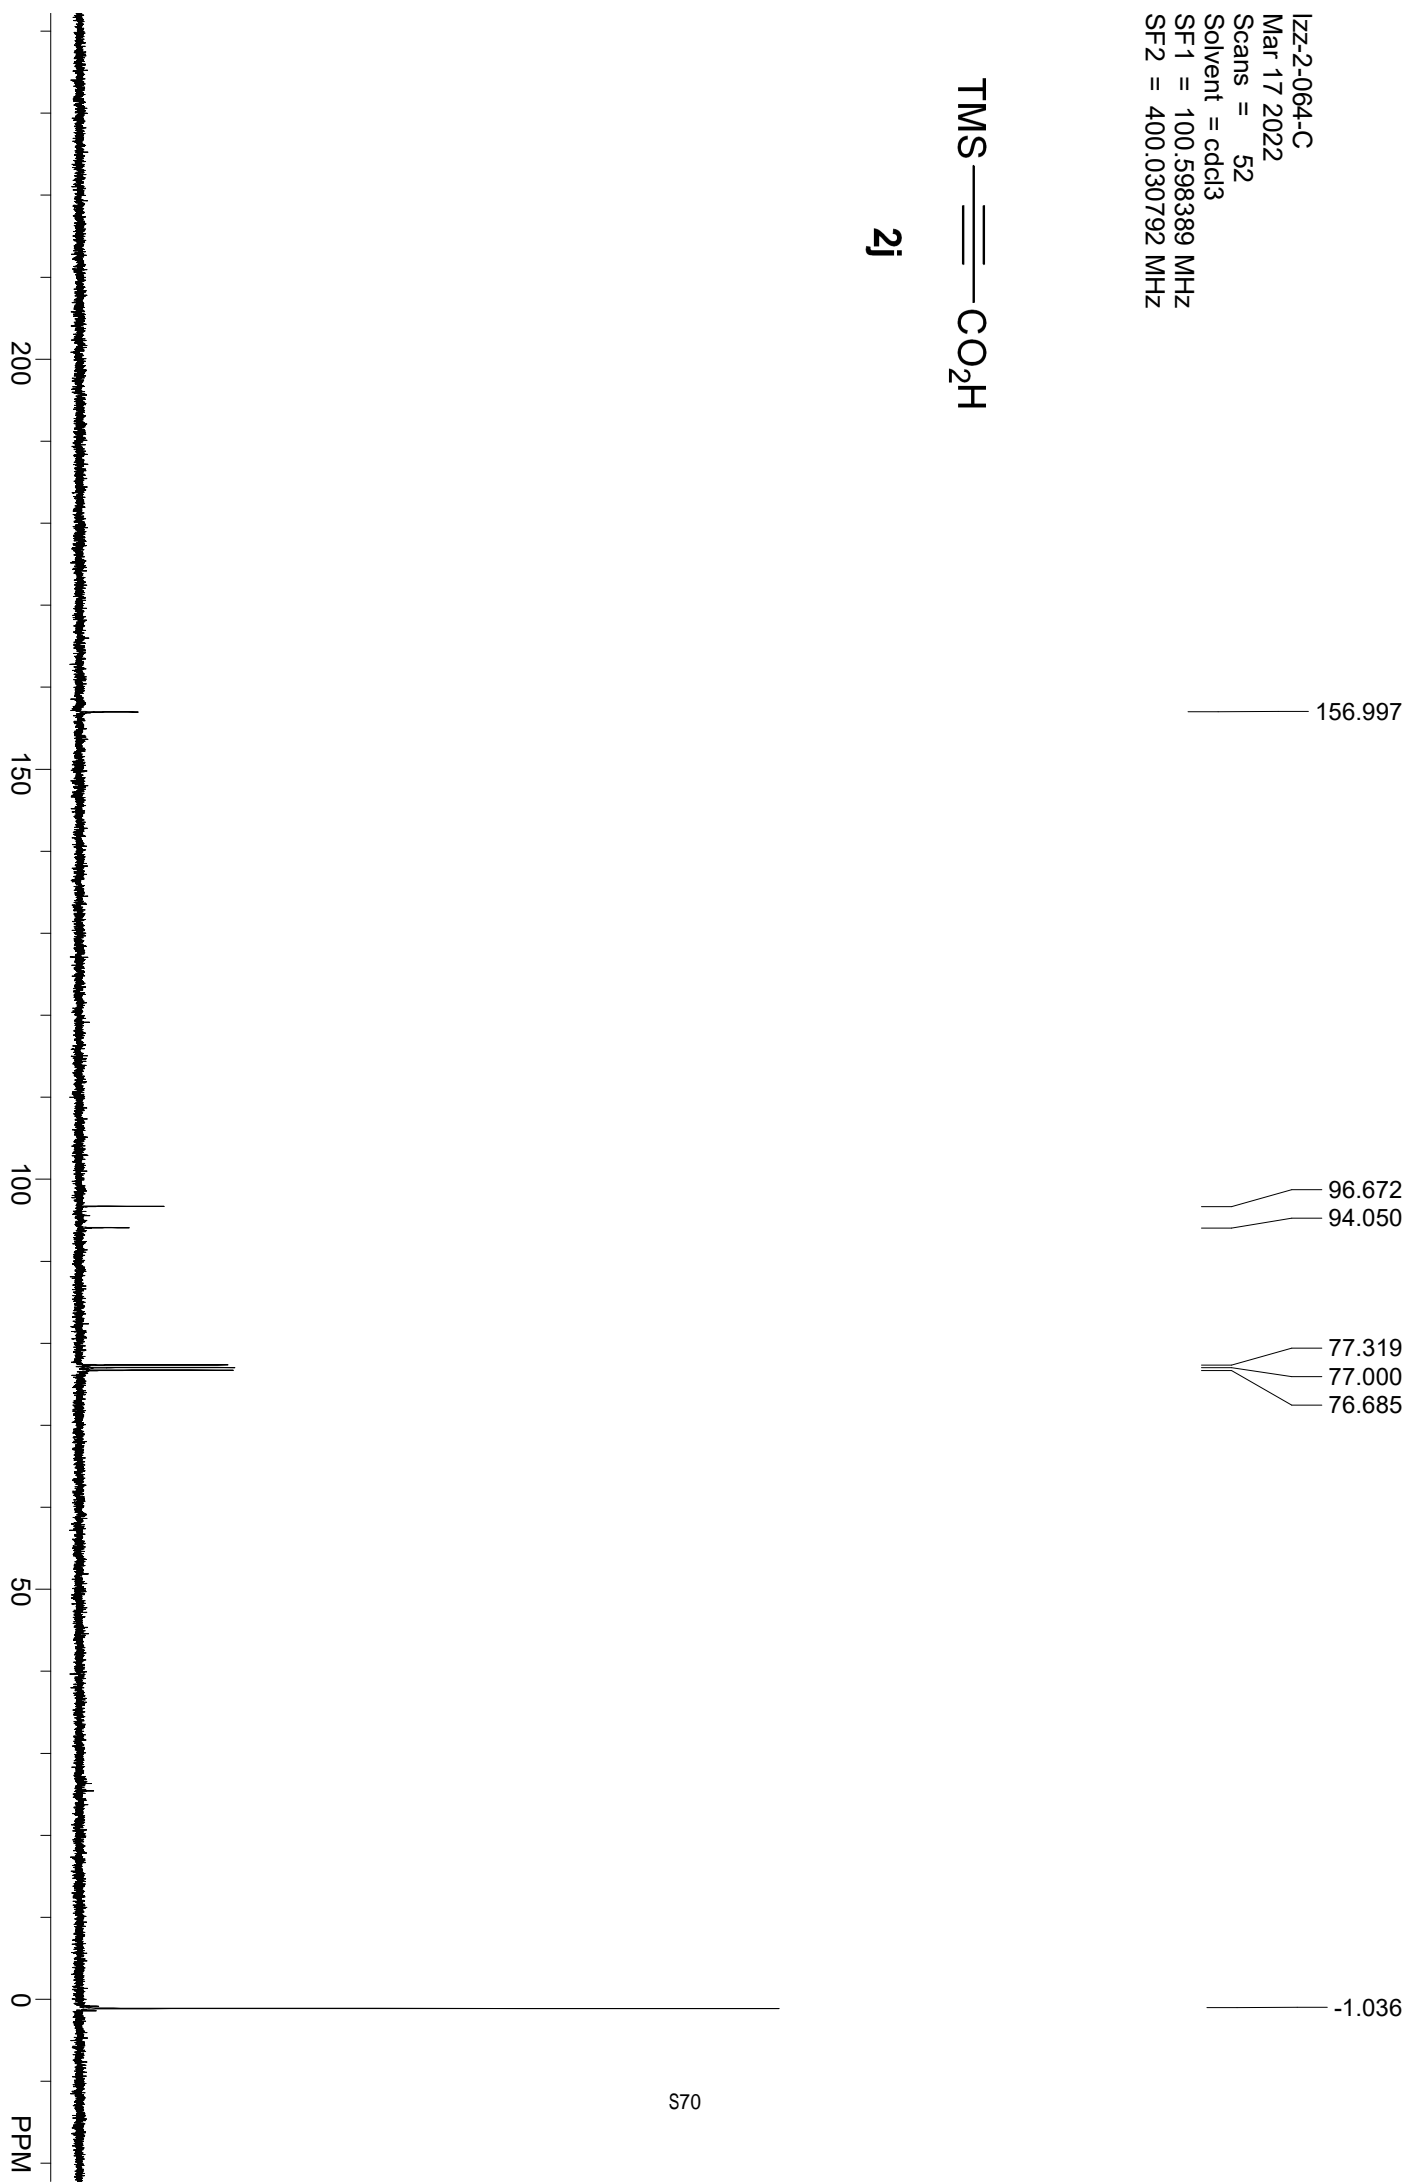

lzz-2-075-H  
Mar 27 2022  
Scans = 4  
Solvent = CDCl3  
SF1 = 400.031799 MHz  
SF2 = 100.596855 MHz

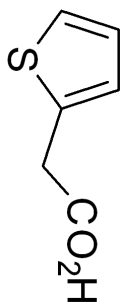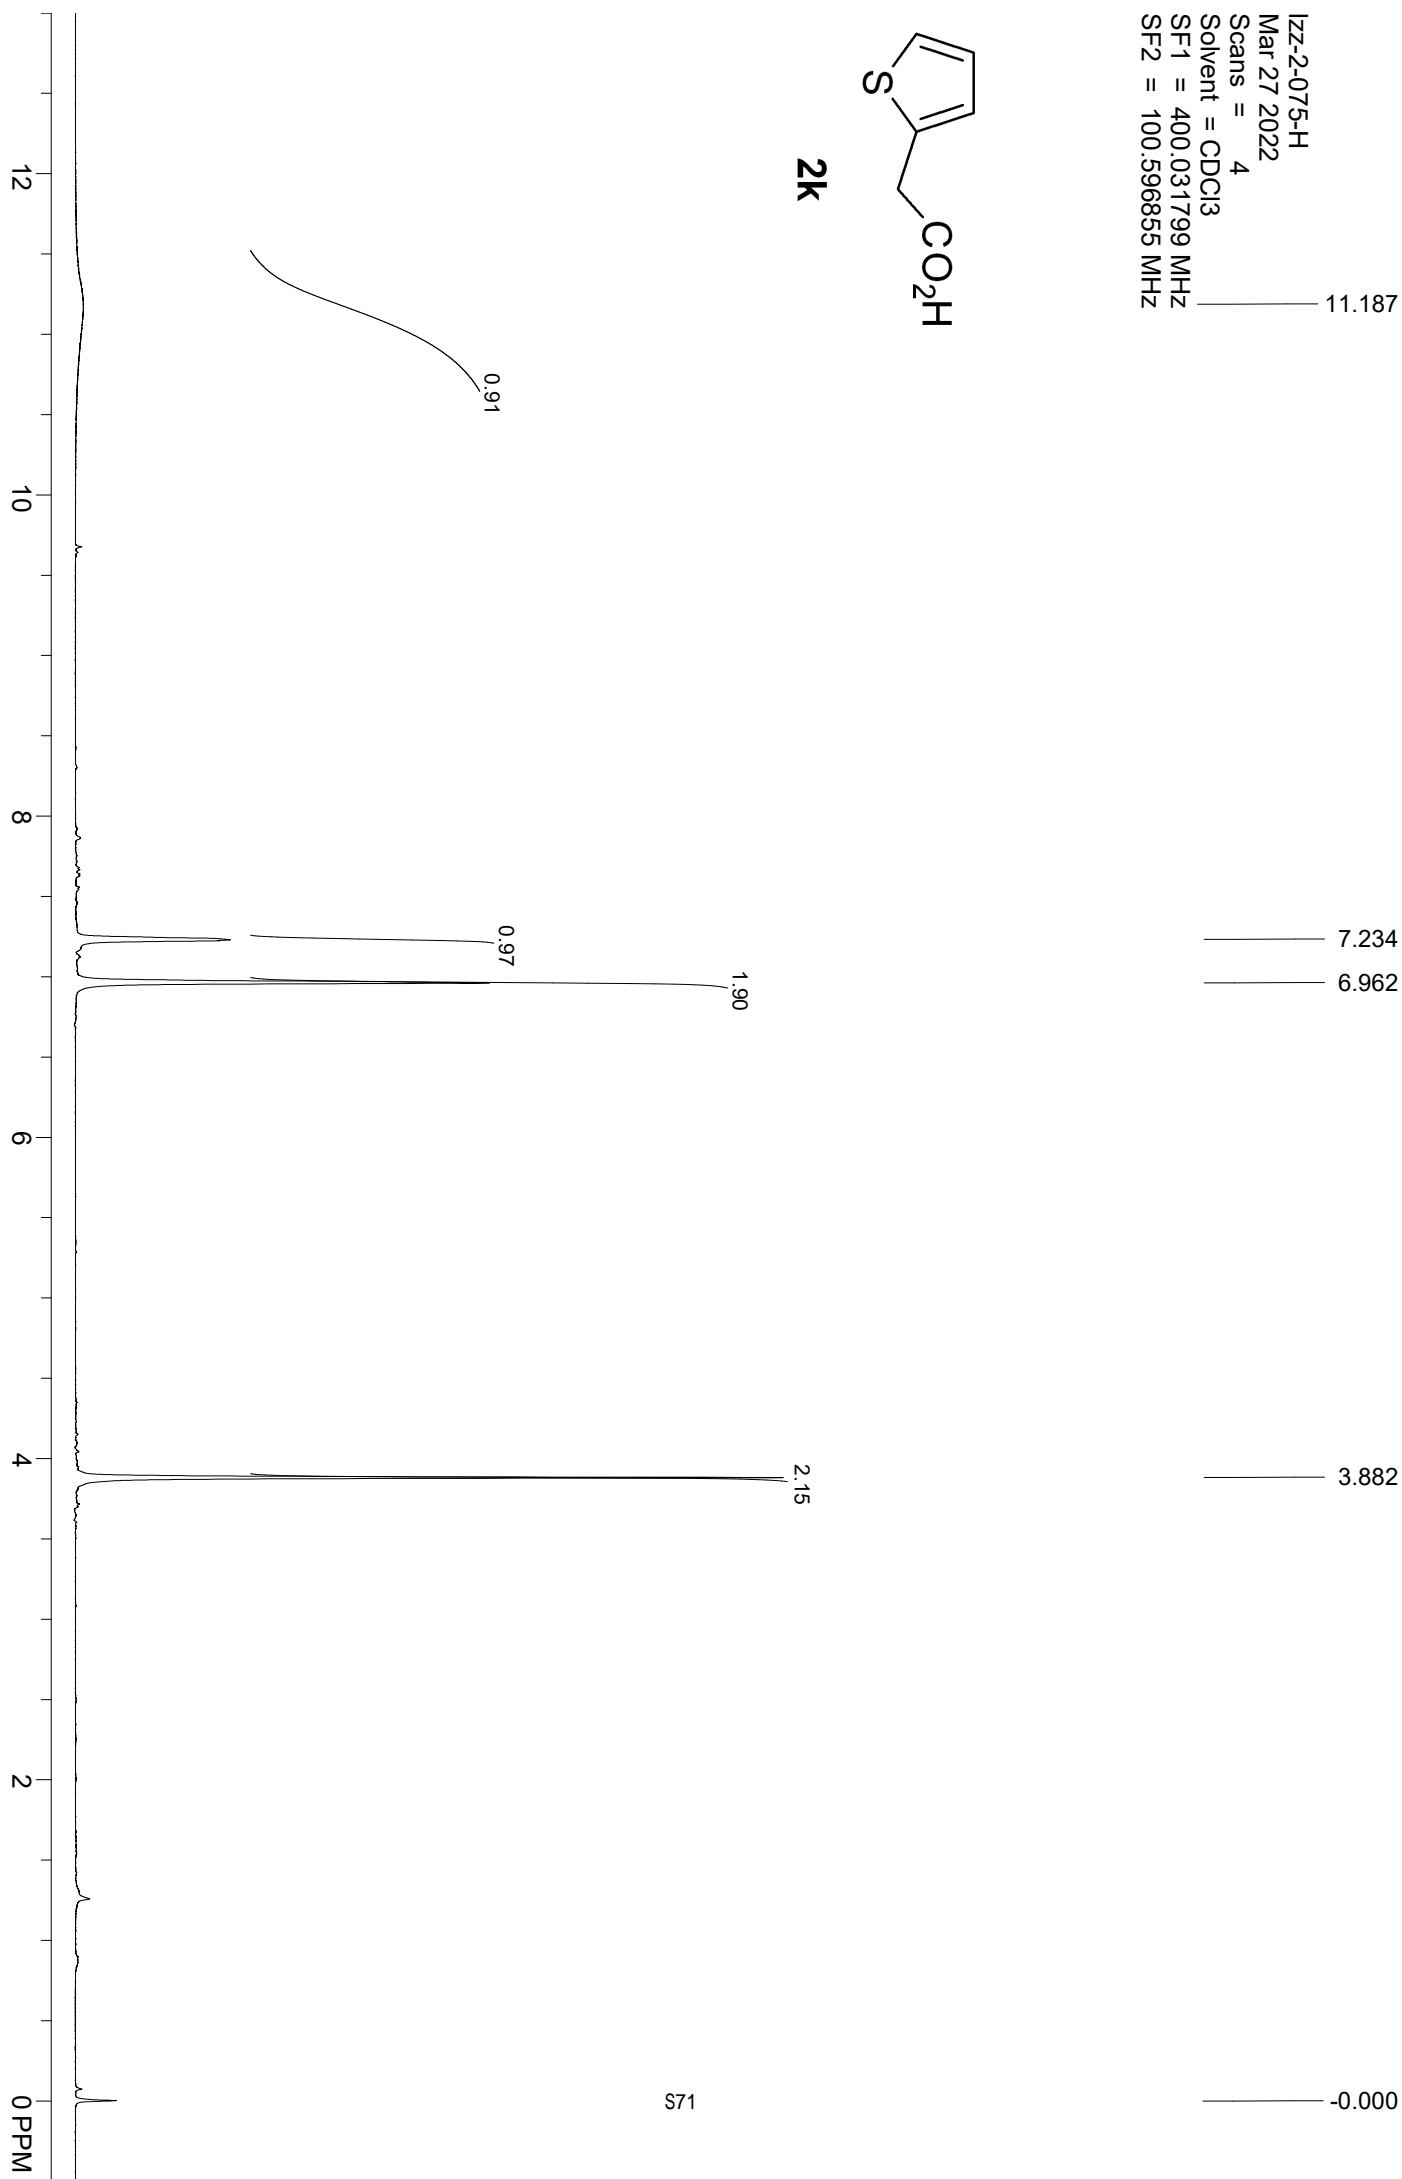

Izz-2-075-C  
Mar 28 2022  
Scans = 92  
Solvent = cdcl3  
SF1 = 100.598389 MHz  
SF2 = 400.030792 MHz

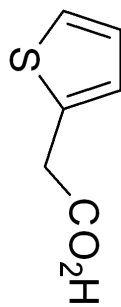

2k

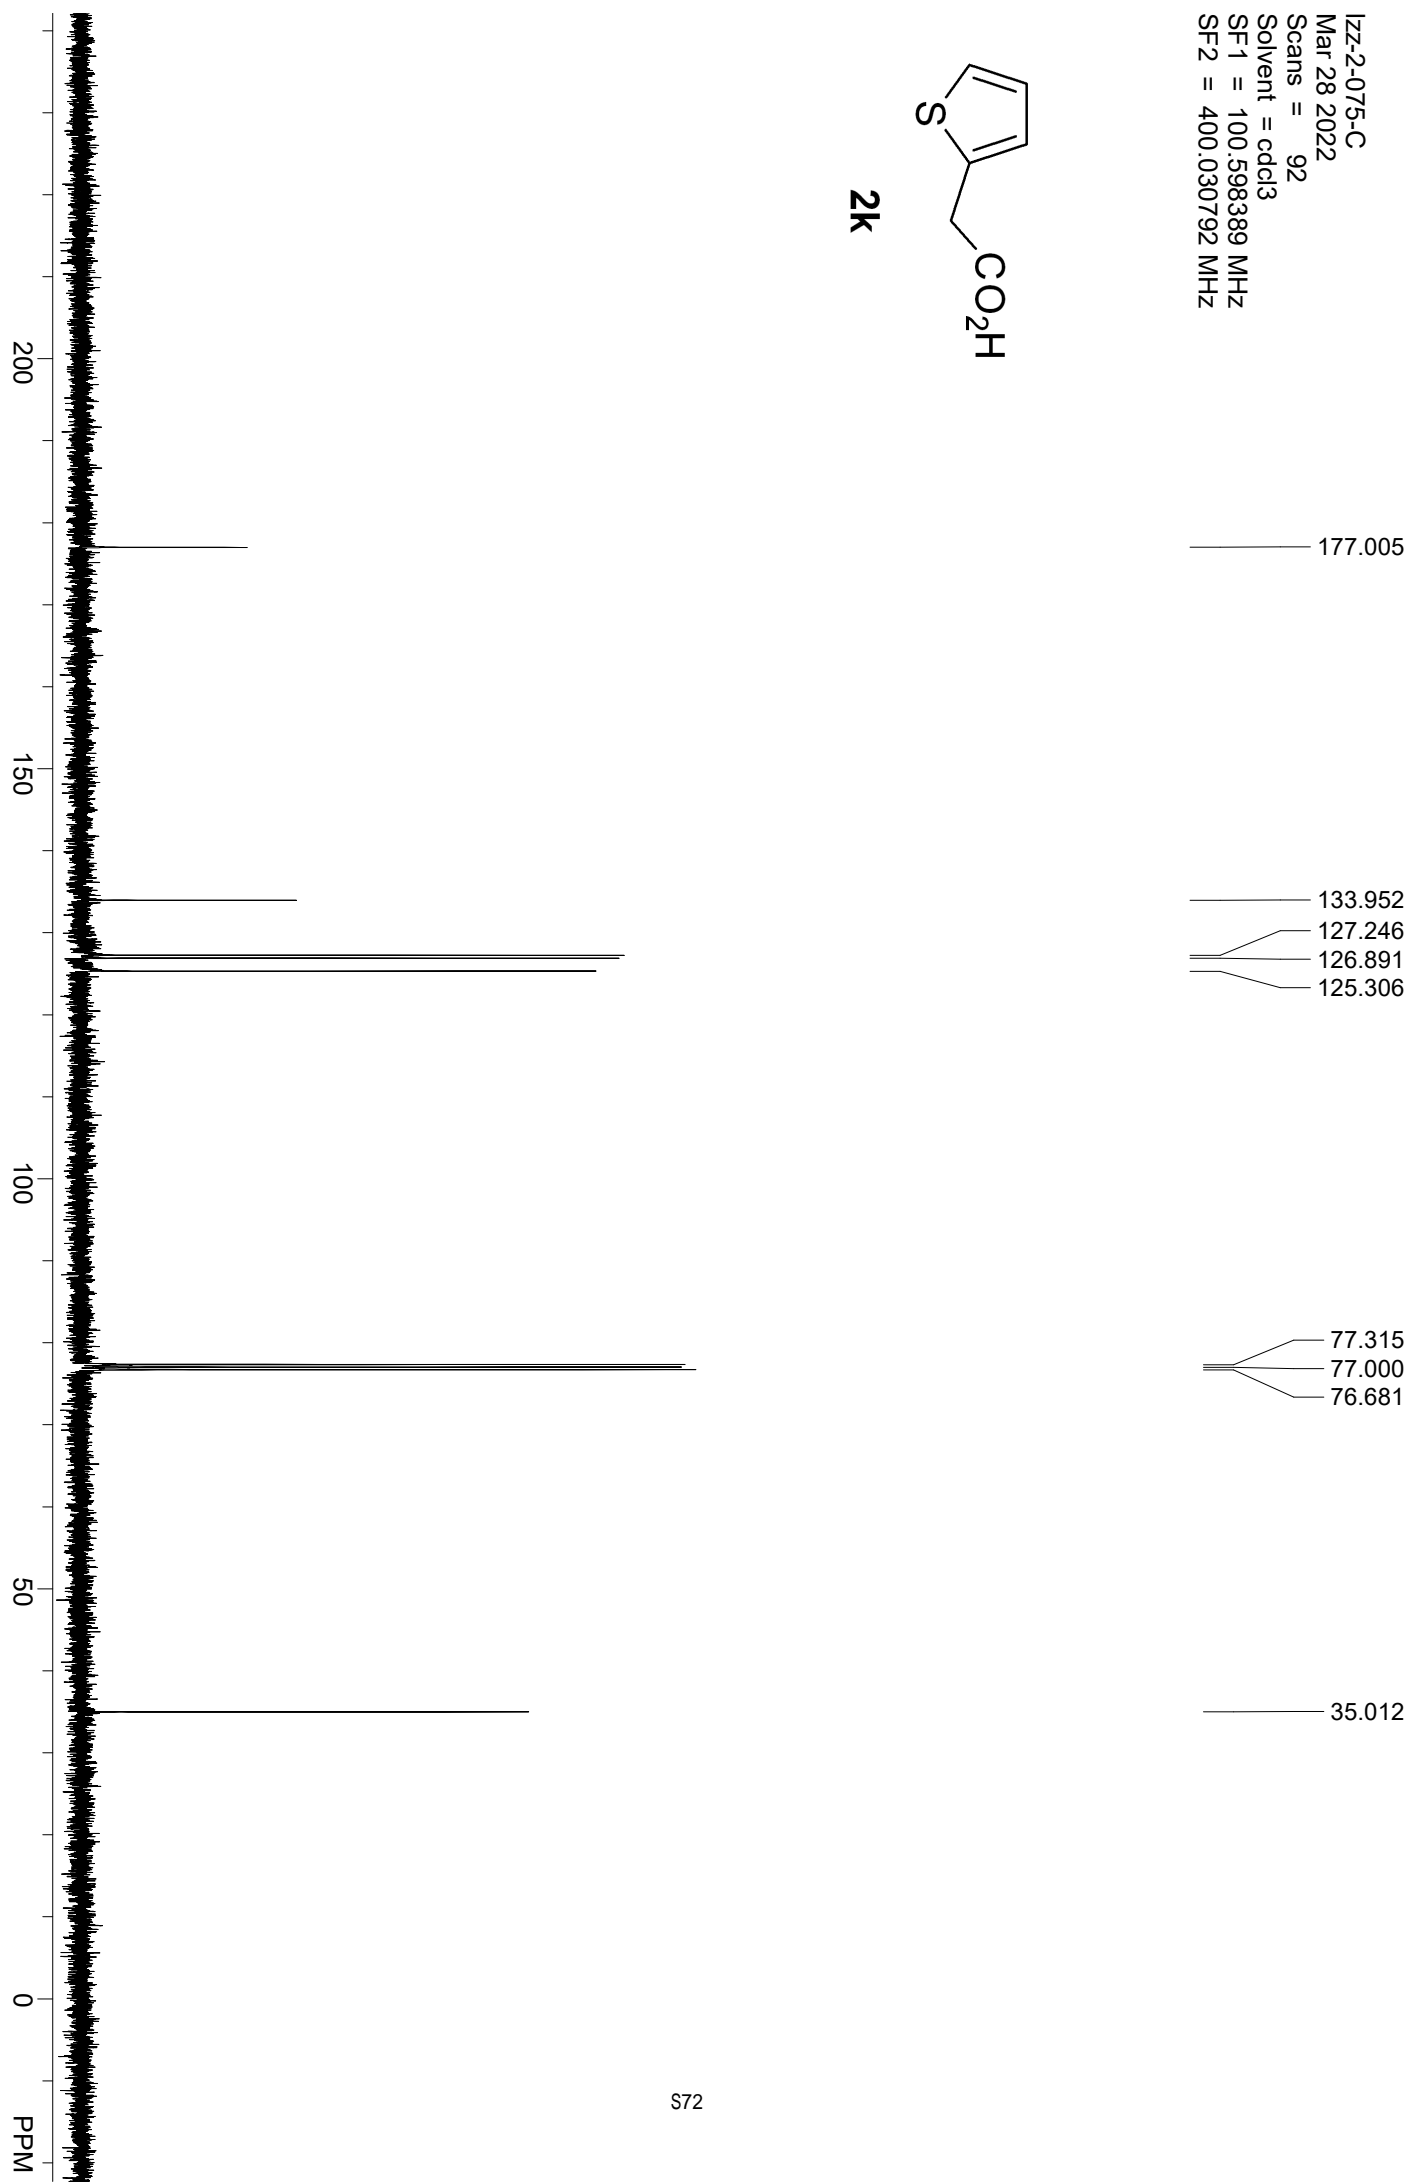



Izz-2-103-H  
Jun 15 2022  
Scans = 8  
Solvent = dmso-d6  
SF1 = 399.719757 MHz  
SF2 = 100.518433 MHz

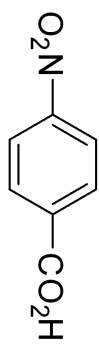

21

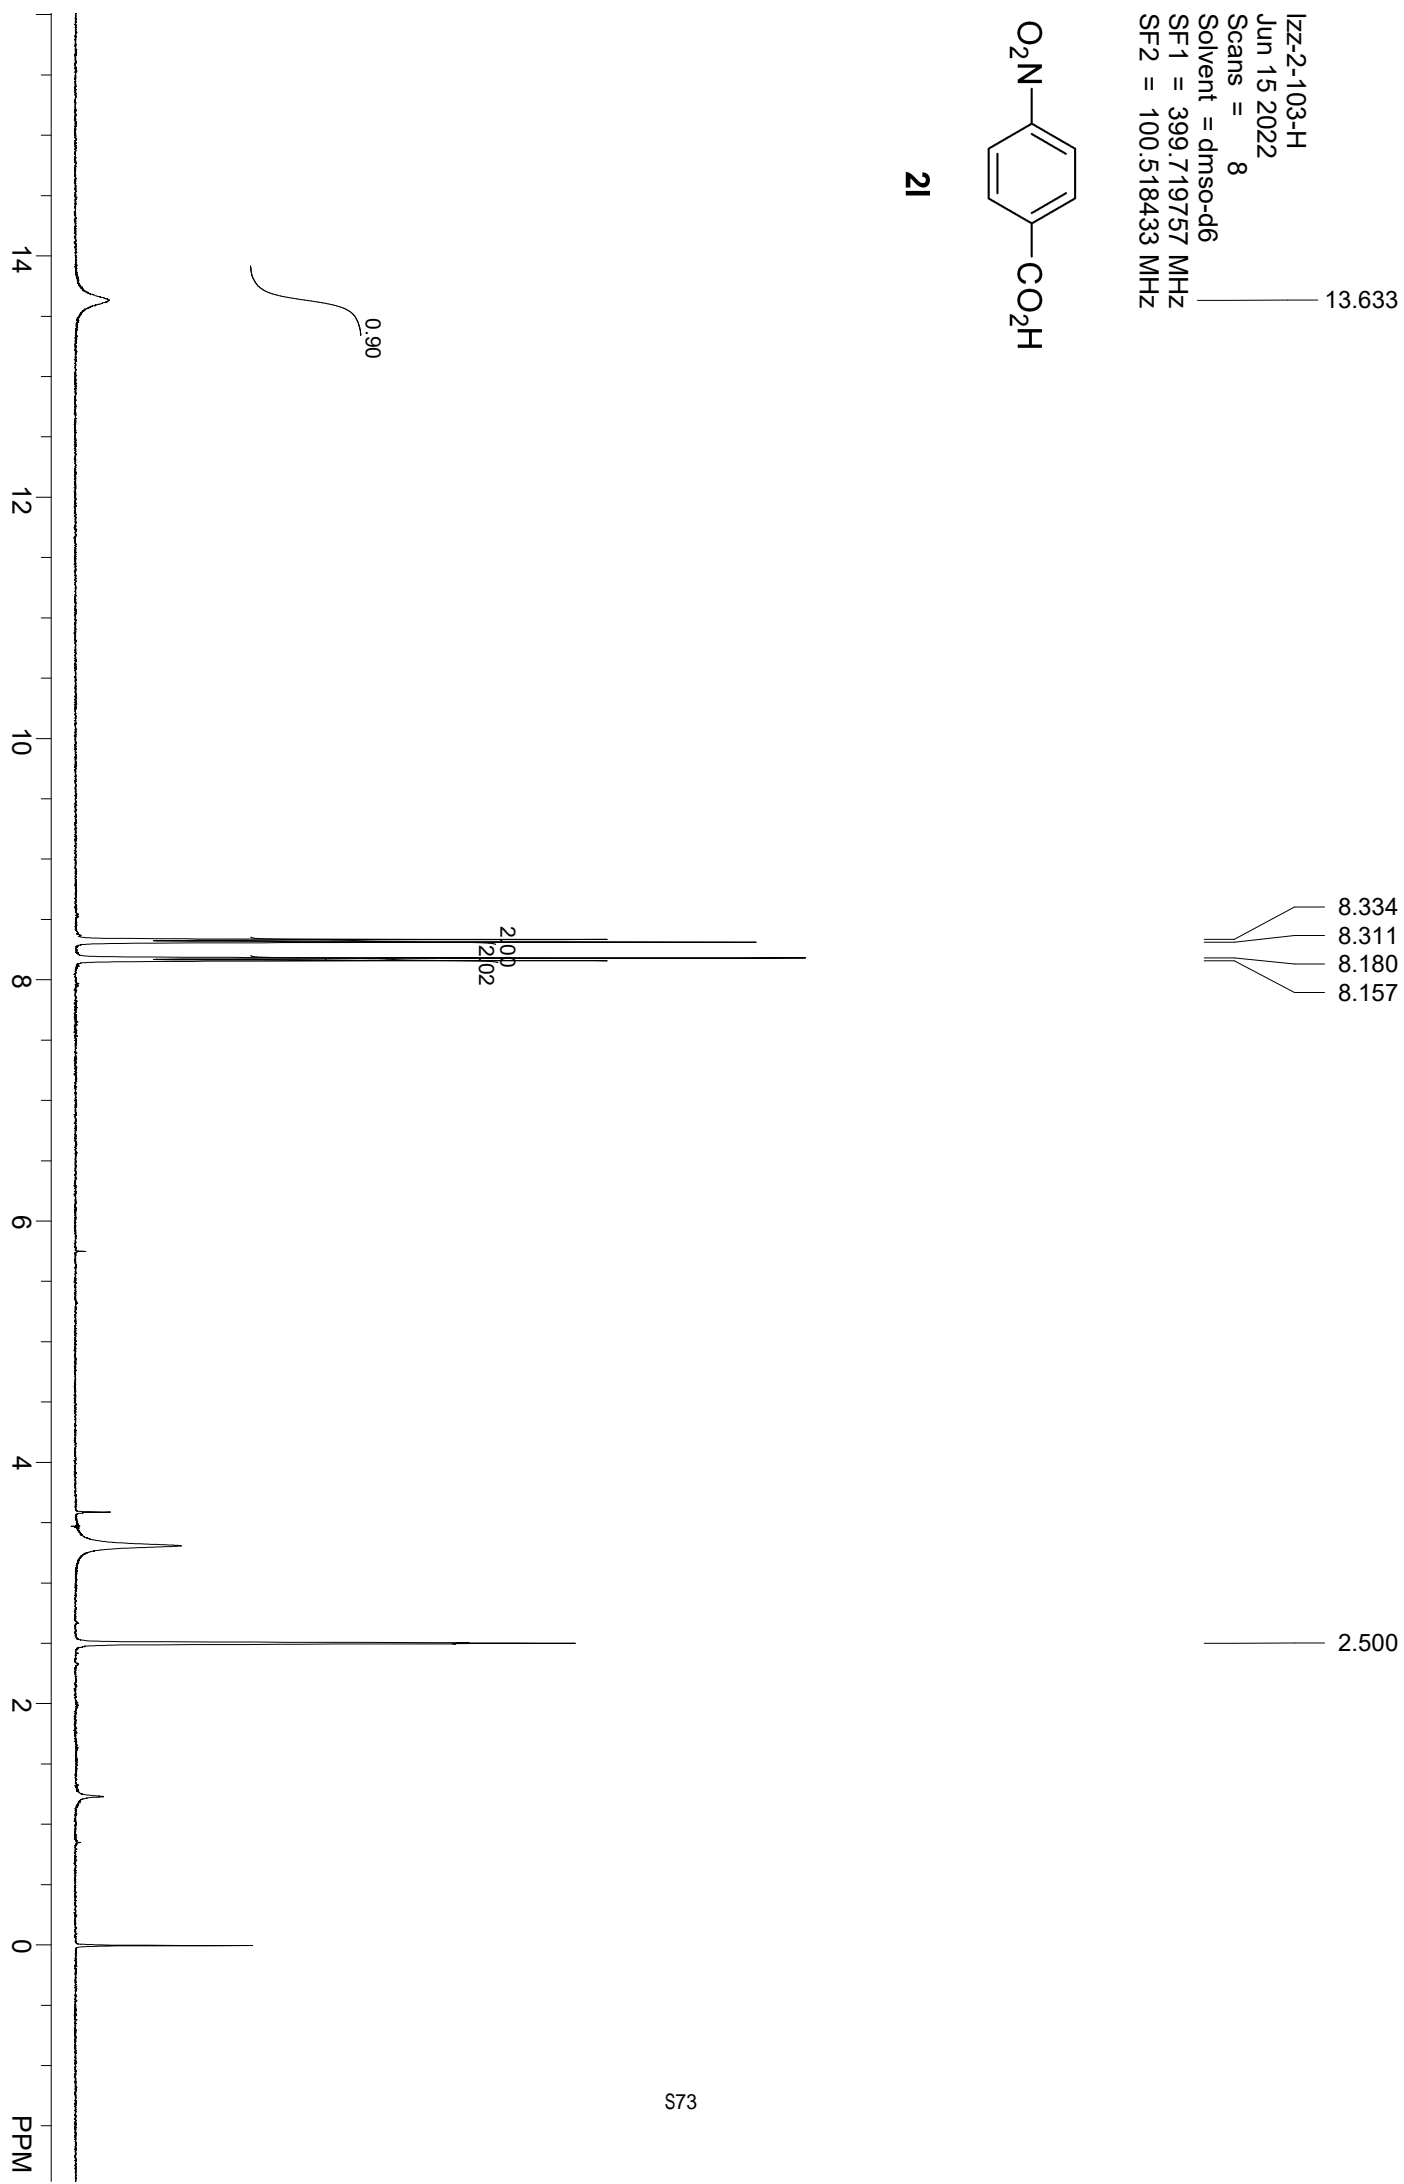

lzz-2-103-C  
d6-DMSO  
Tue Jun 14 07:51:37 2022  
Scans = 480  
SF1 = 100.617798 MHz  
SF2 = 1.000000 MHz

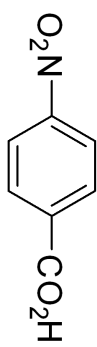

**21**

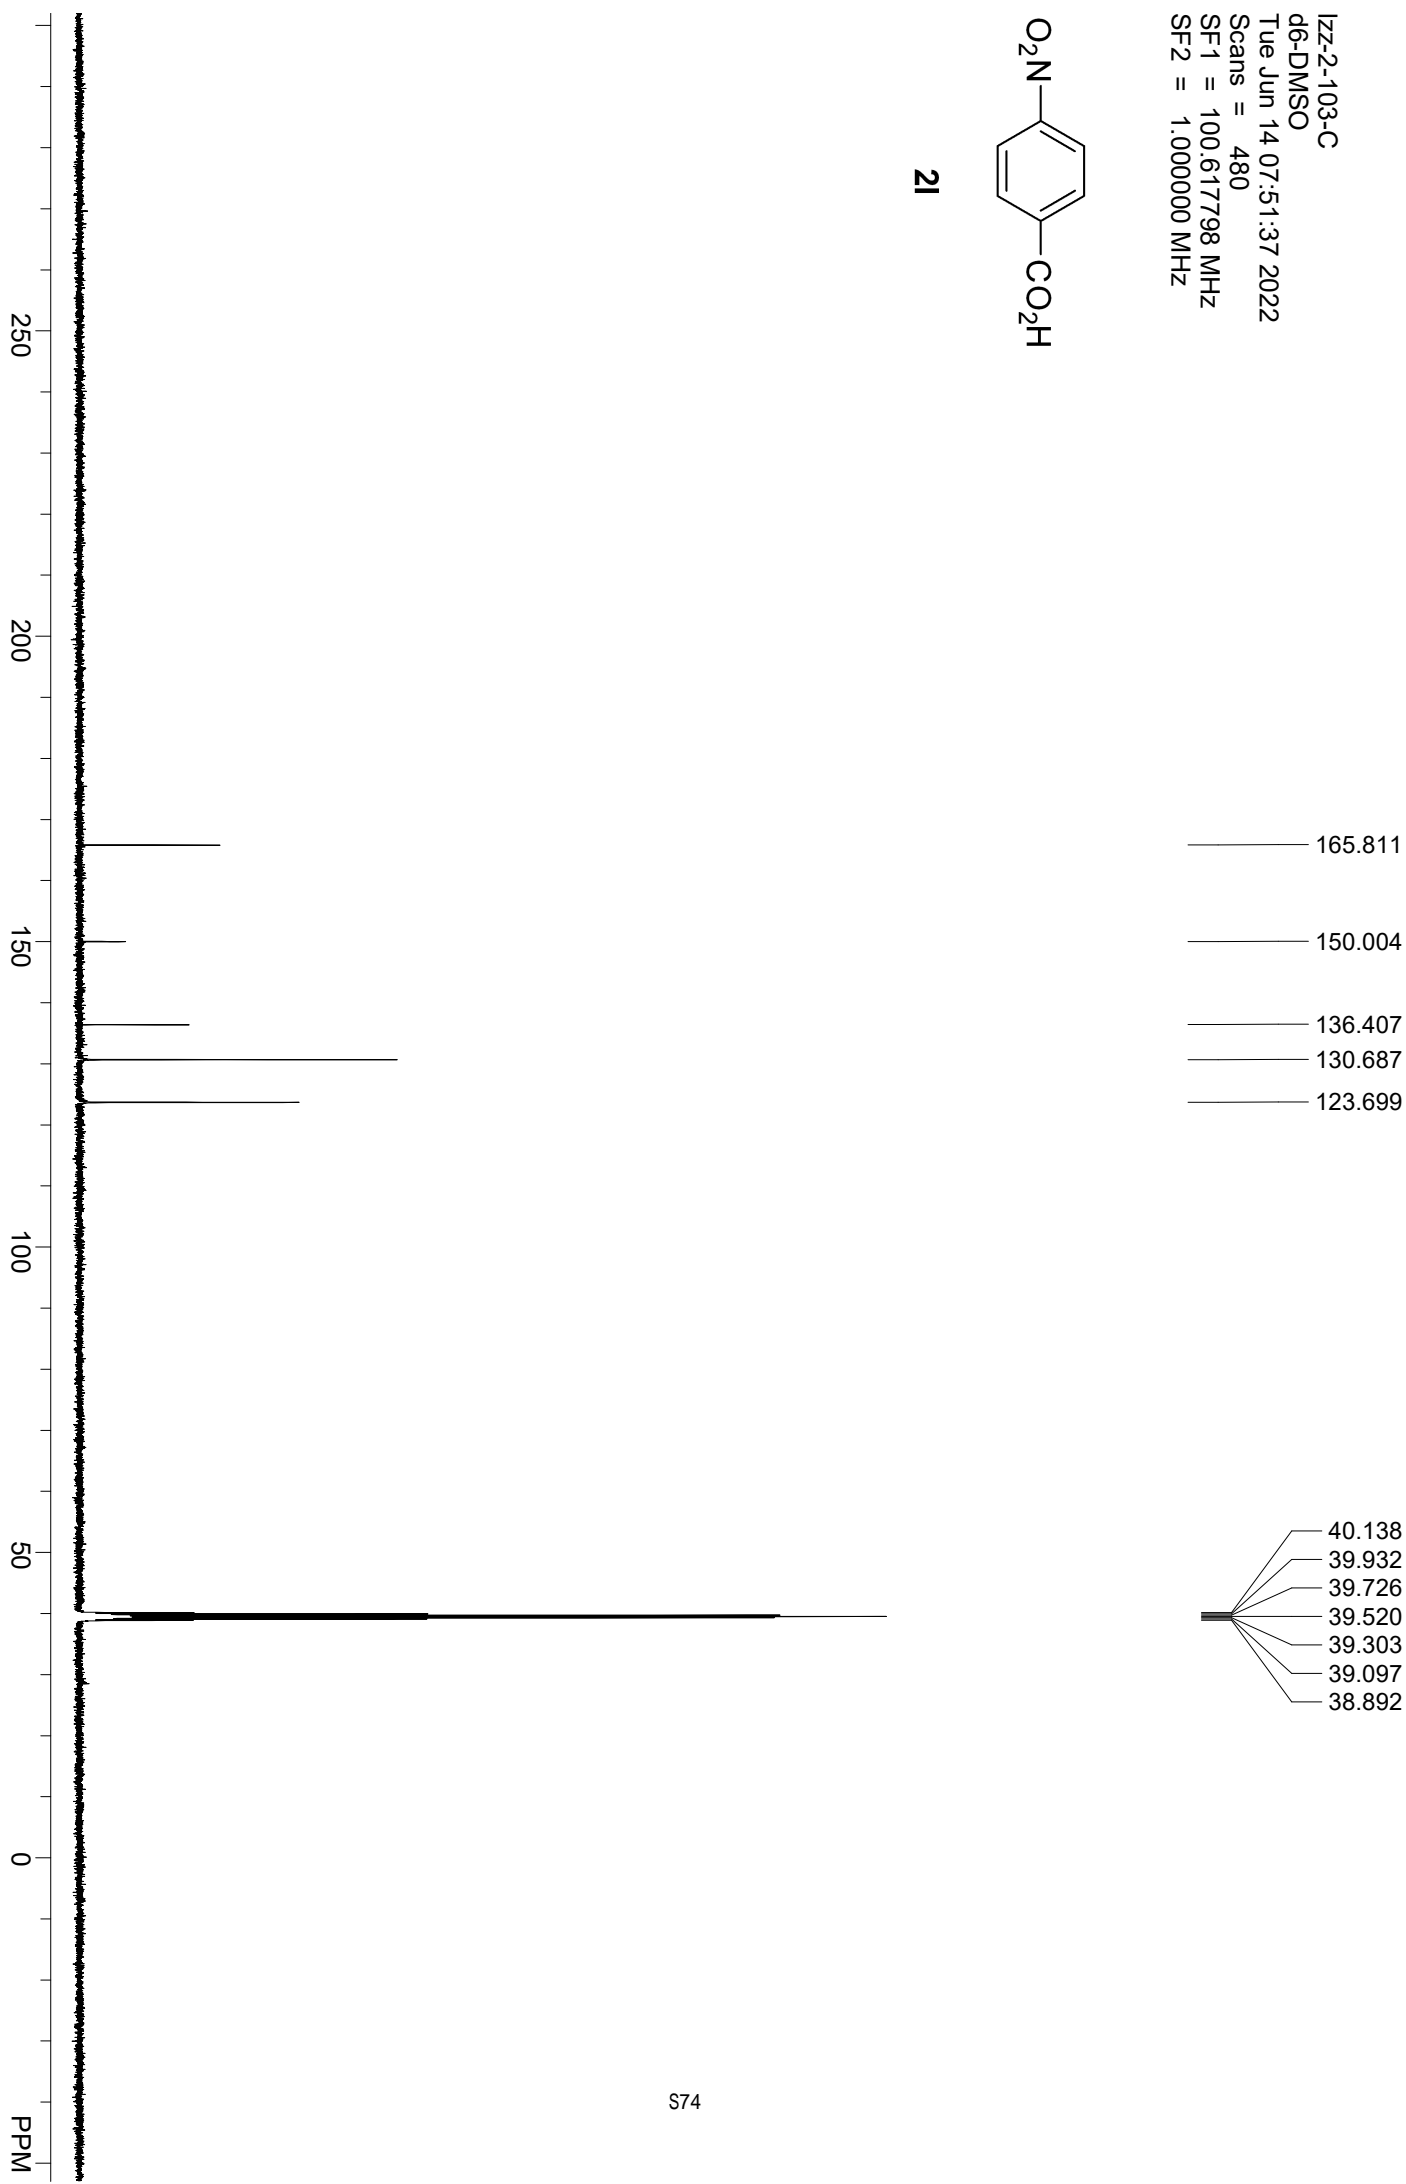

lzz-2-103-test  
purity = 97%  
12.6 mg of product with 5.0\*10<sup>-6</sup> L dibromomethane  
DMSO  
Tue Jun 21 22:46:23 2022  
Scans = 16  
SF1 = 400.102600 MHz  
SF2 = 1.000000 MHz

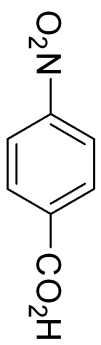

21

$$purity = \frac{5.0 \times 2.477}{173.83} \times \frac{2}{2} \times 1.03 \times 167.1 \div 12.6 \approx 97\%$$

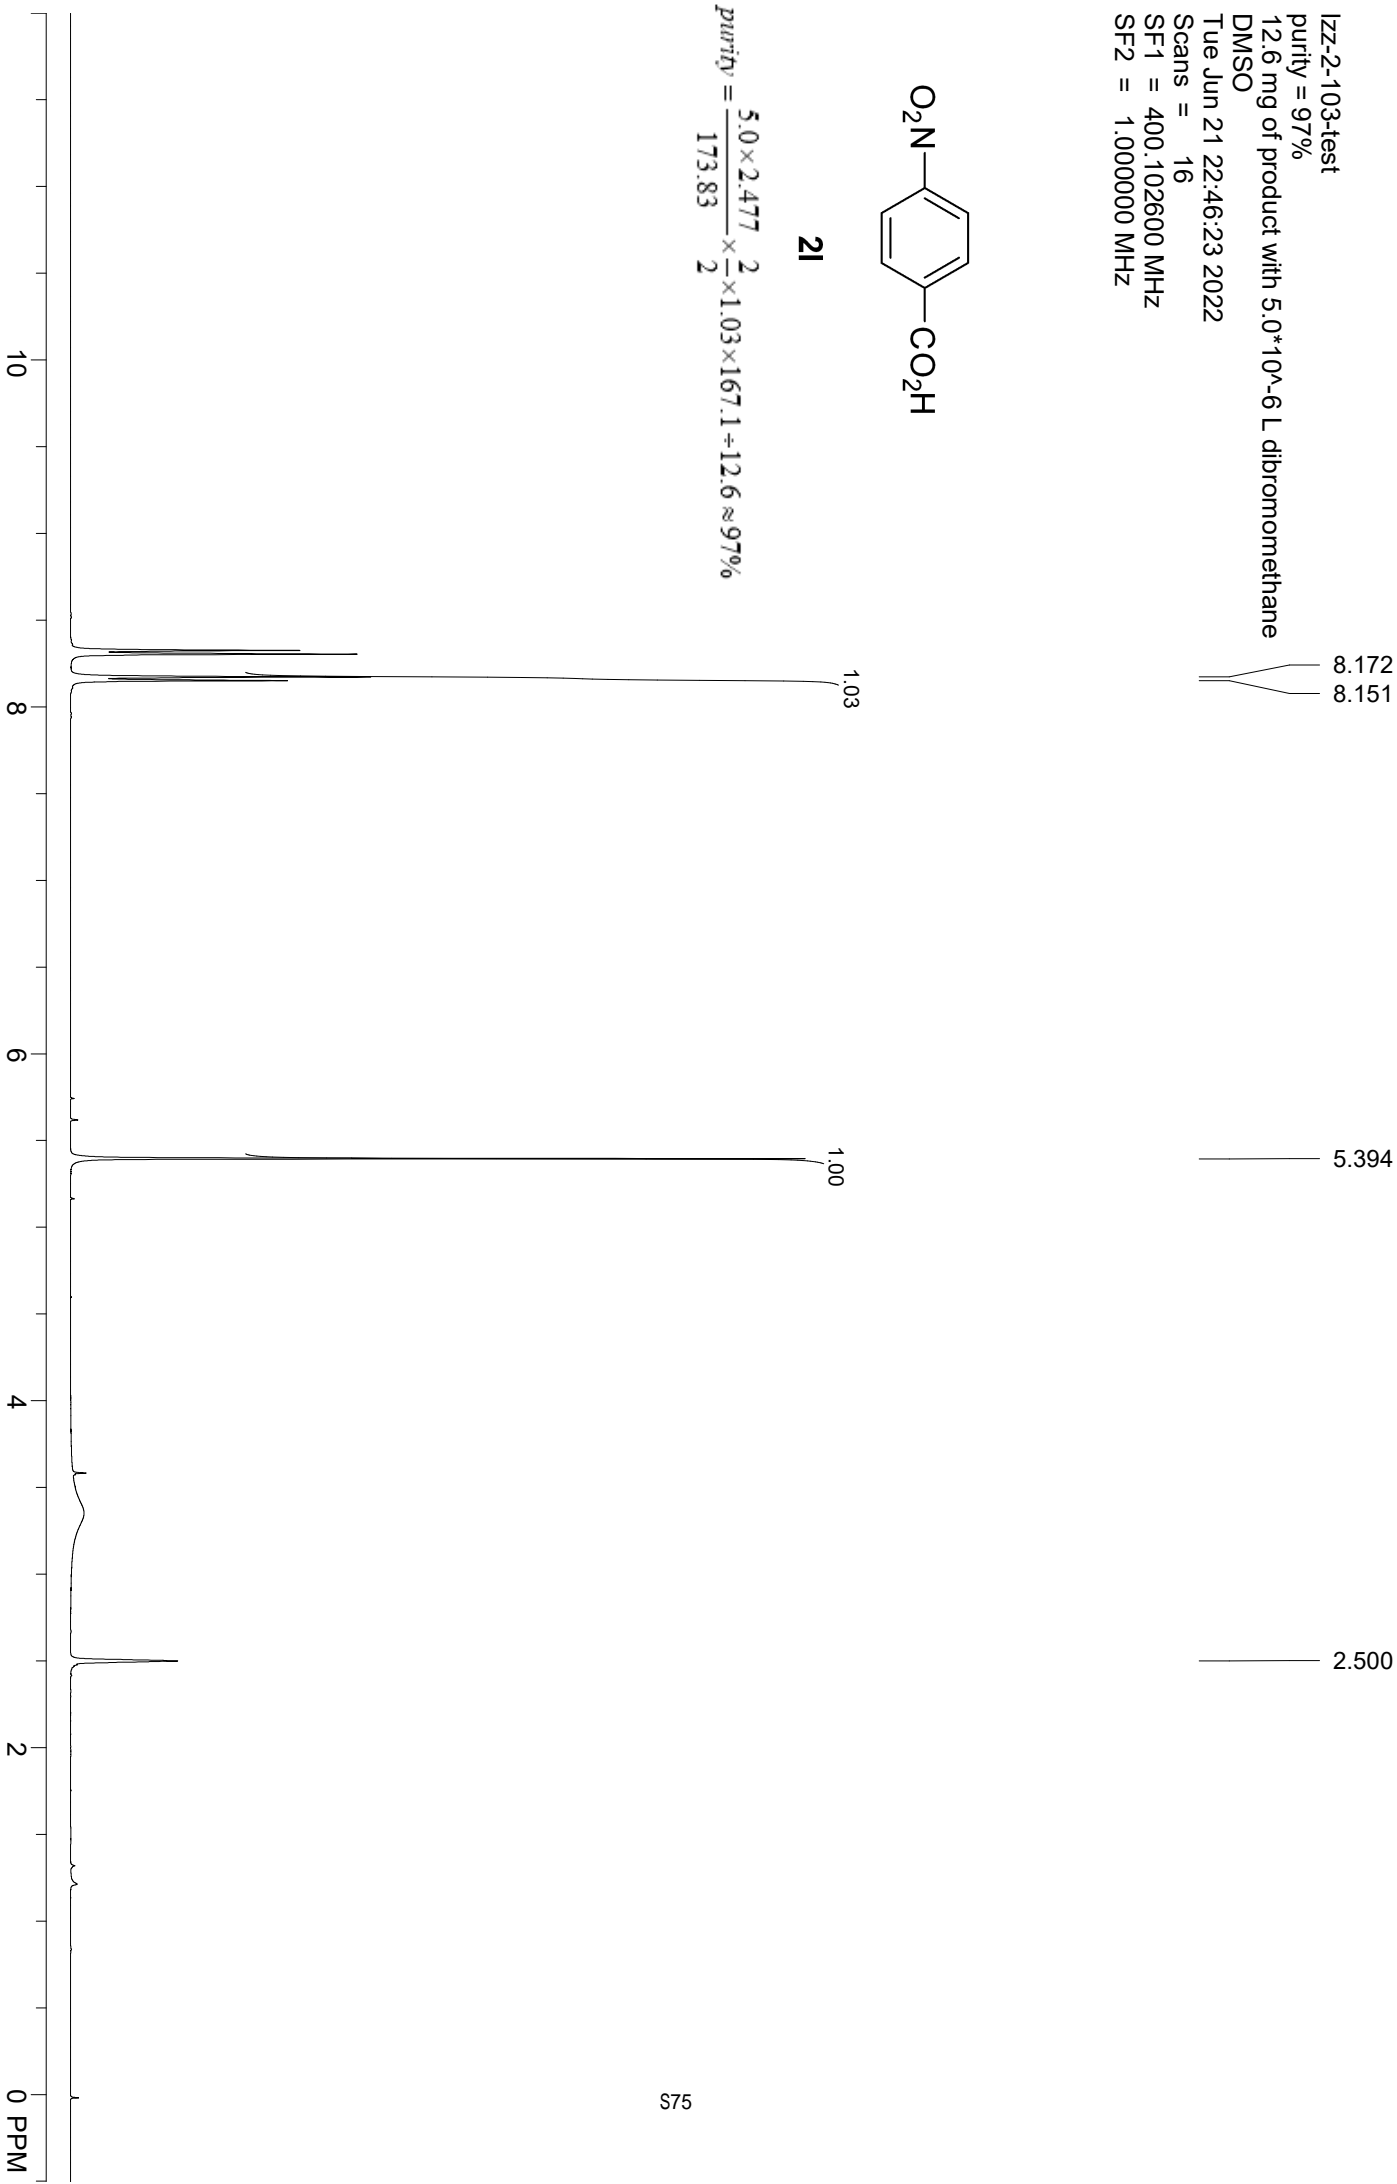

lzz-1-64-H  
2020-05-31 19:48:48.968  
Scans = 8  
Solvent = CDCl3  
SF1 = 300.130005 MHz  
SF2 = 1.000000 MHz

TBDPSO(CH<sub>2</sub>)<sub>5</sub>CO<sub>2</sub>H

4ae

from 3aea

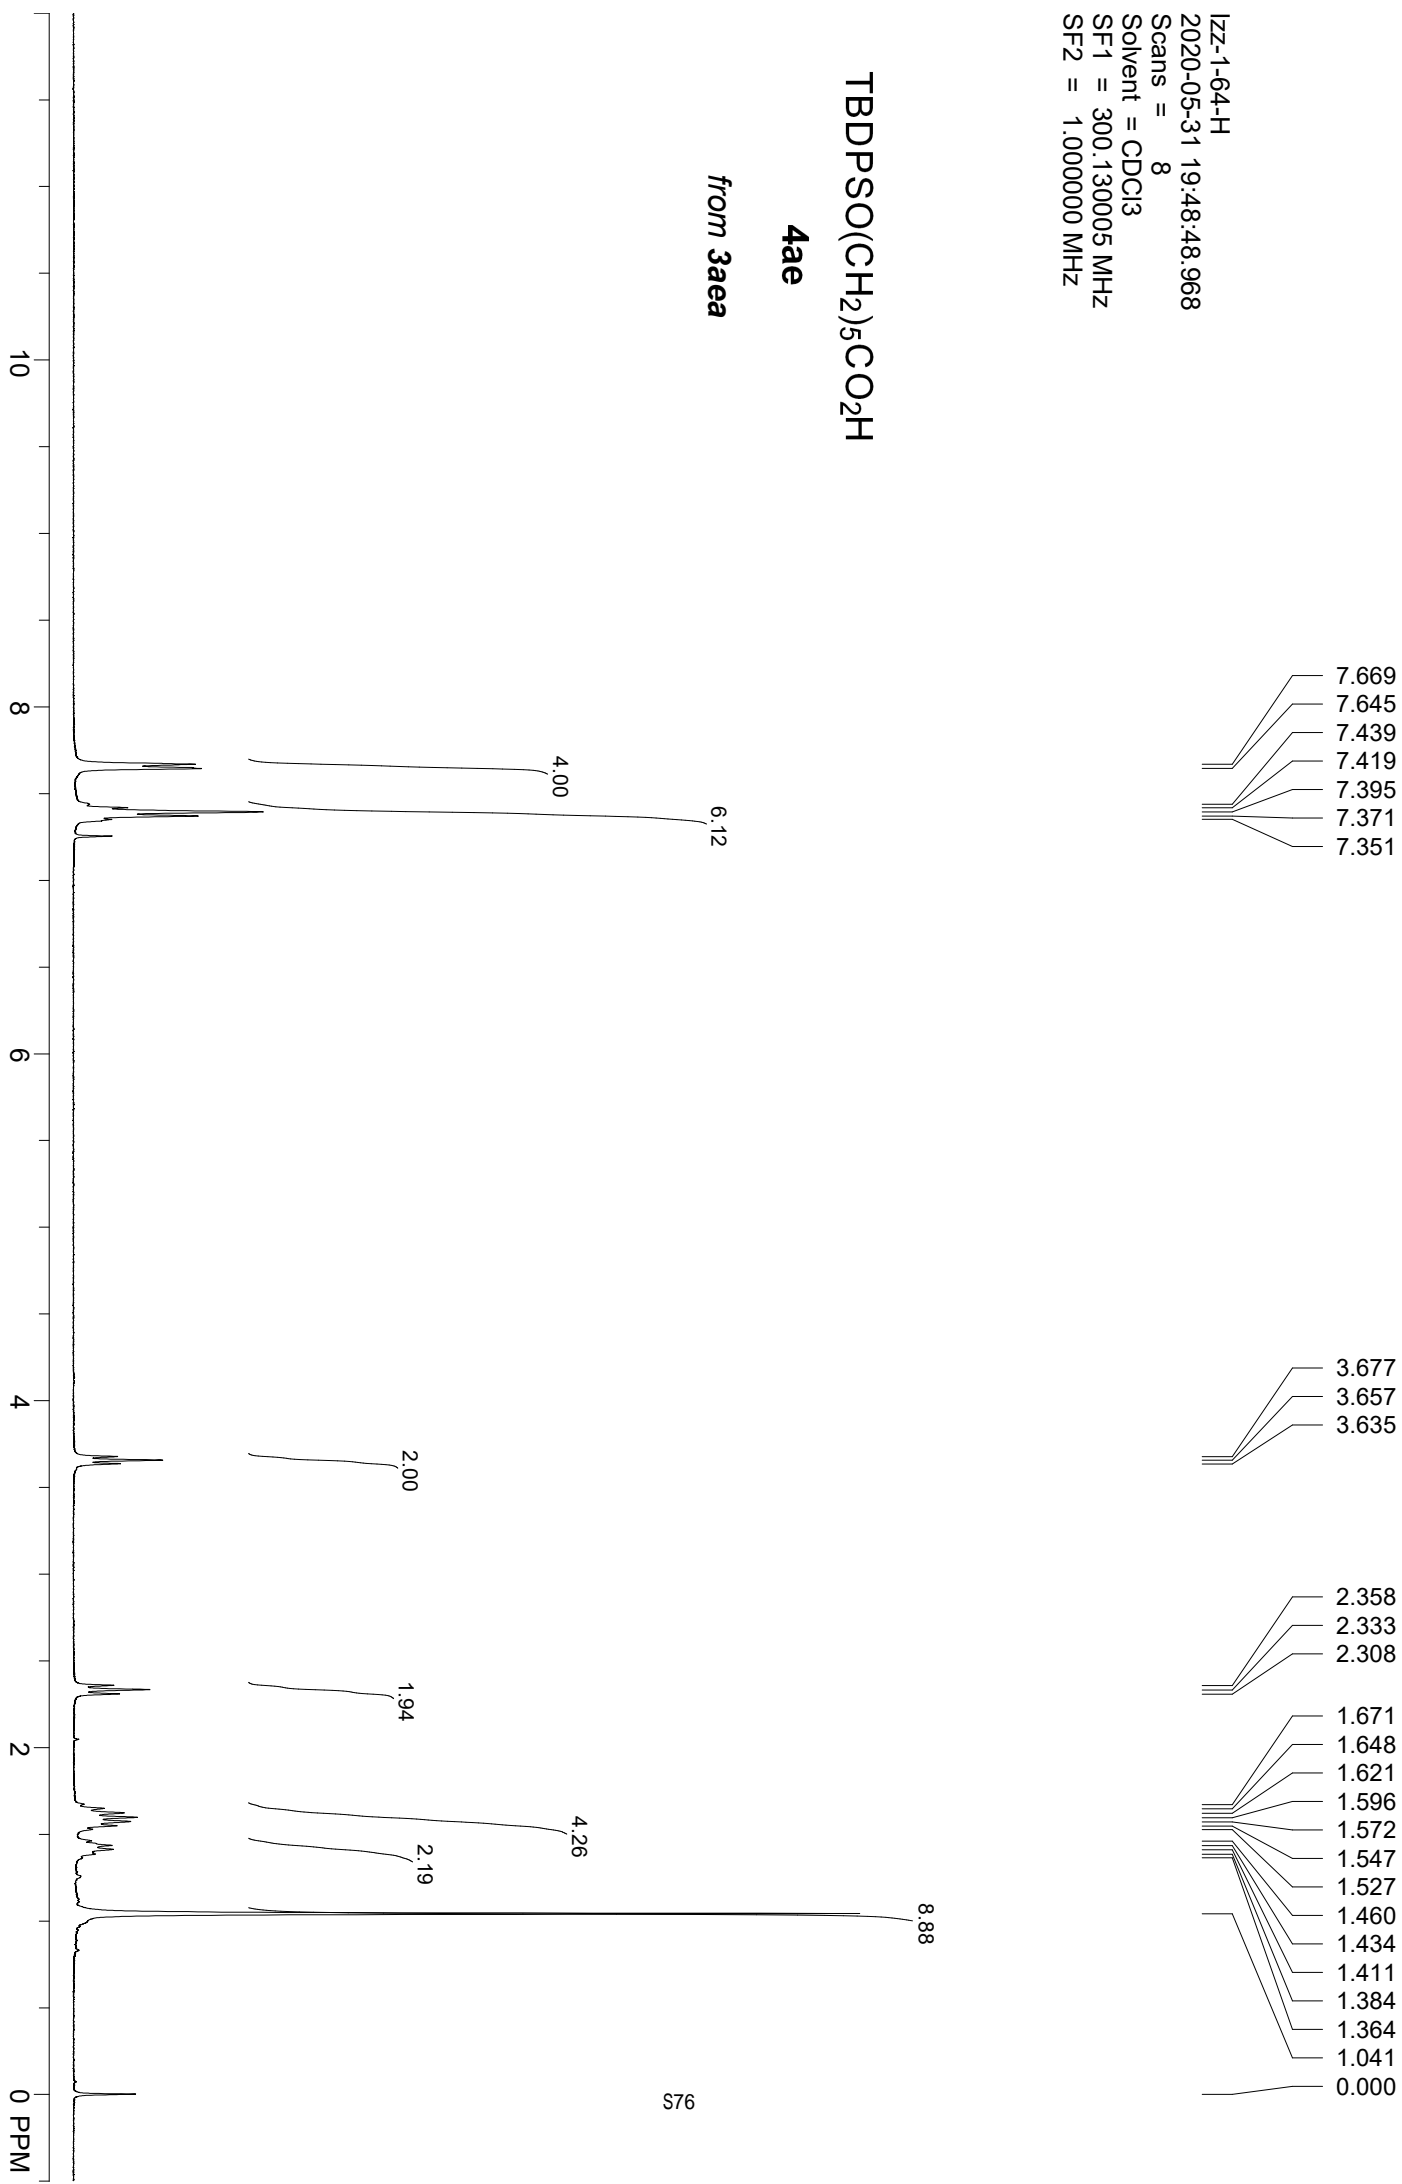

lzz-1-64-C  
2020-06-01 12:53:44.718  
Scans = 1194  
Solvent = CDCl3  
SF1 = 75.467751 MHz  
SF2 = 1.000000 MHz

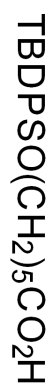

**4ae**

*from 3aea*

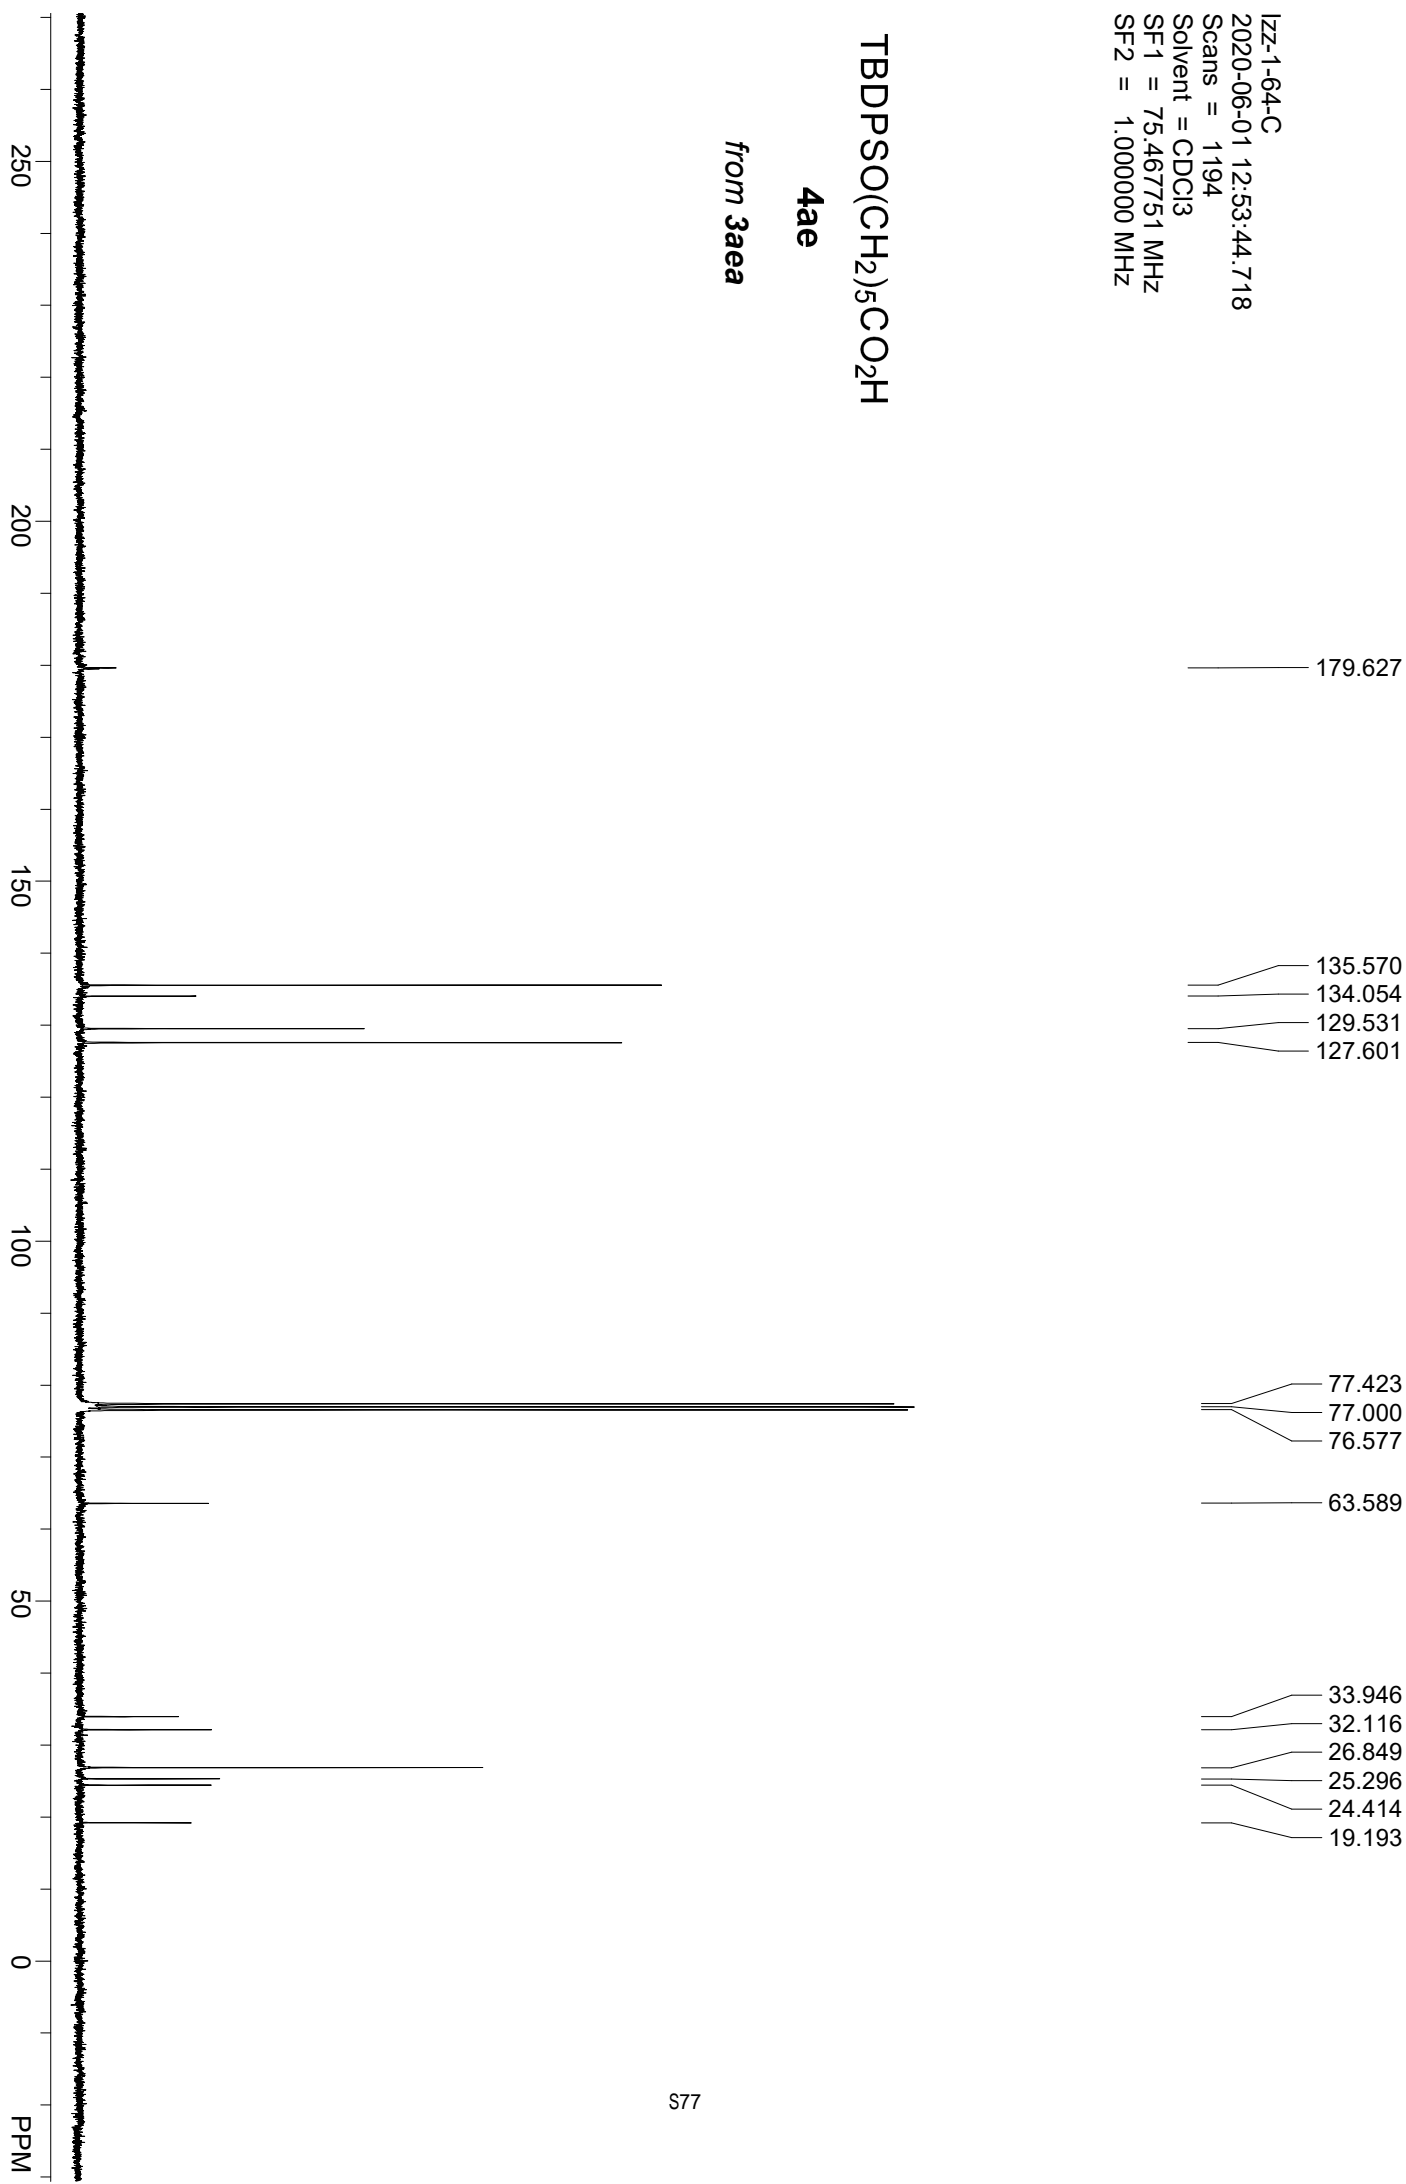

lzz-2-055-H  
Mar 10 2022  
Scans = 4  
Solvent = CDCl3  
SF1 = 400.031799 MHz  
SF2 = 100.596855 MHz

TBDPSO(CH<sub>2</sub>)<sub>5</sub>CO<sub>2</sub>H

4ae

from 3aeb

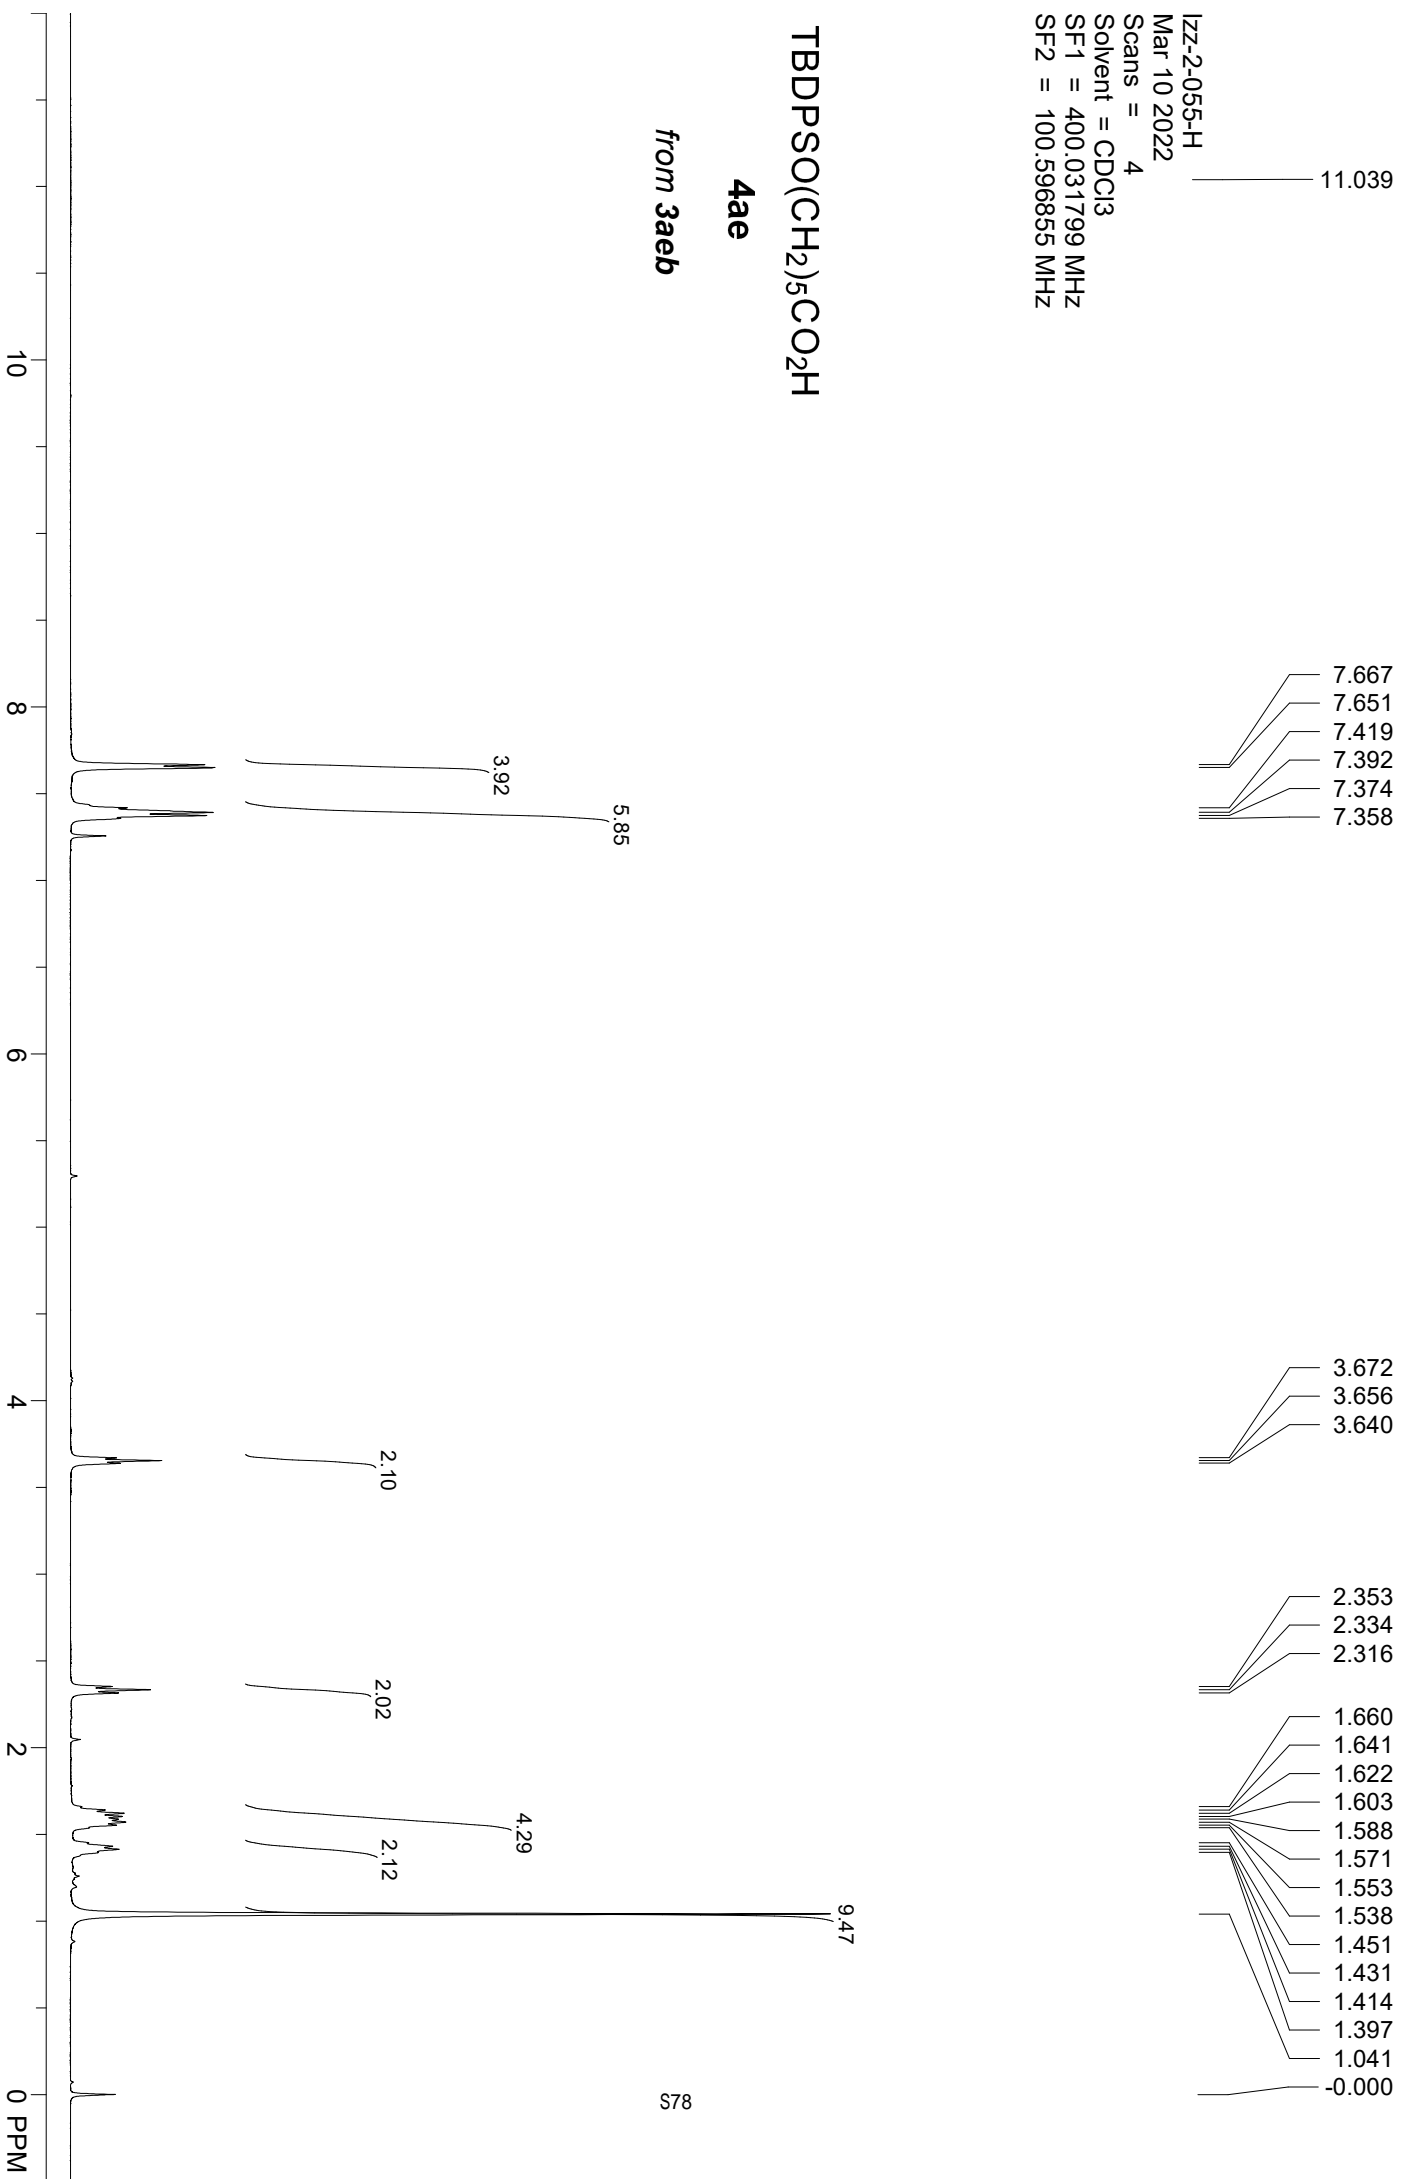

lzz-2-055-C  
Mar 10 2022  
Scans = 68  
Solvent = cdcl3  
SF1 = 100.519485 MHz  
SF2 = 399.717072 MHz

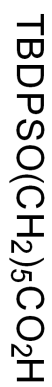

**4ae**

*from 3aeb*

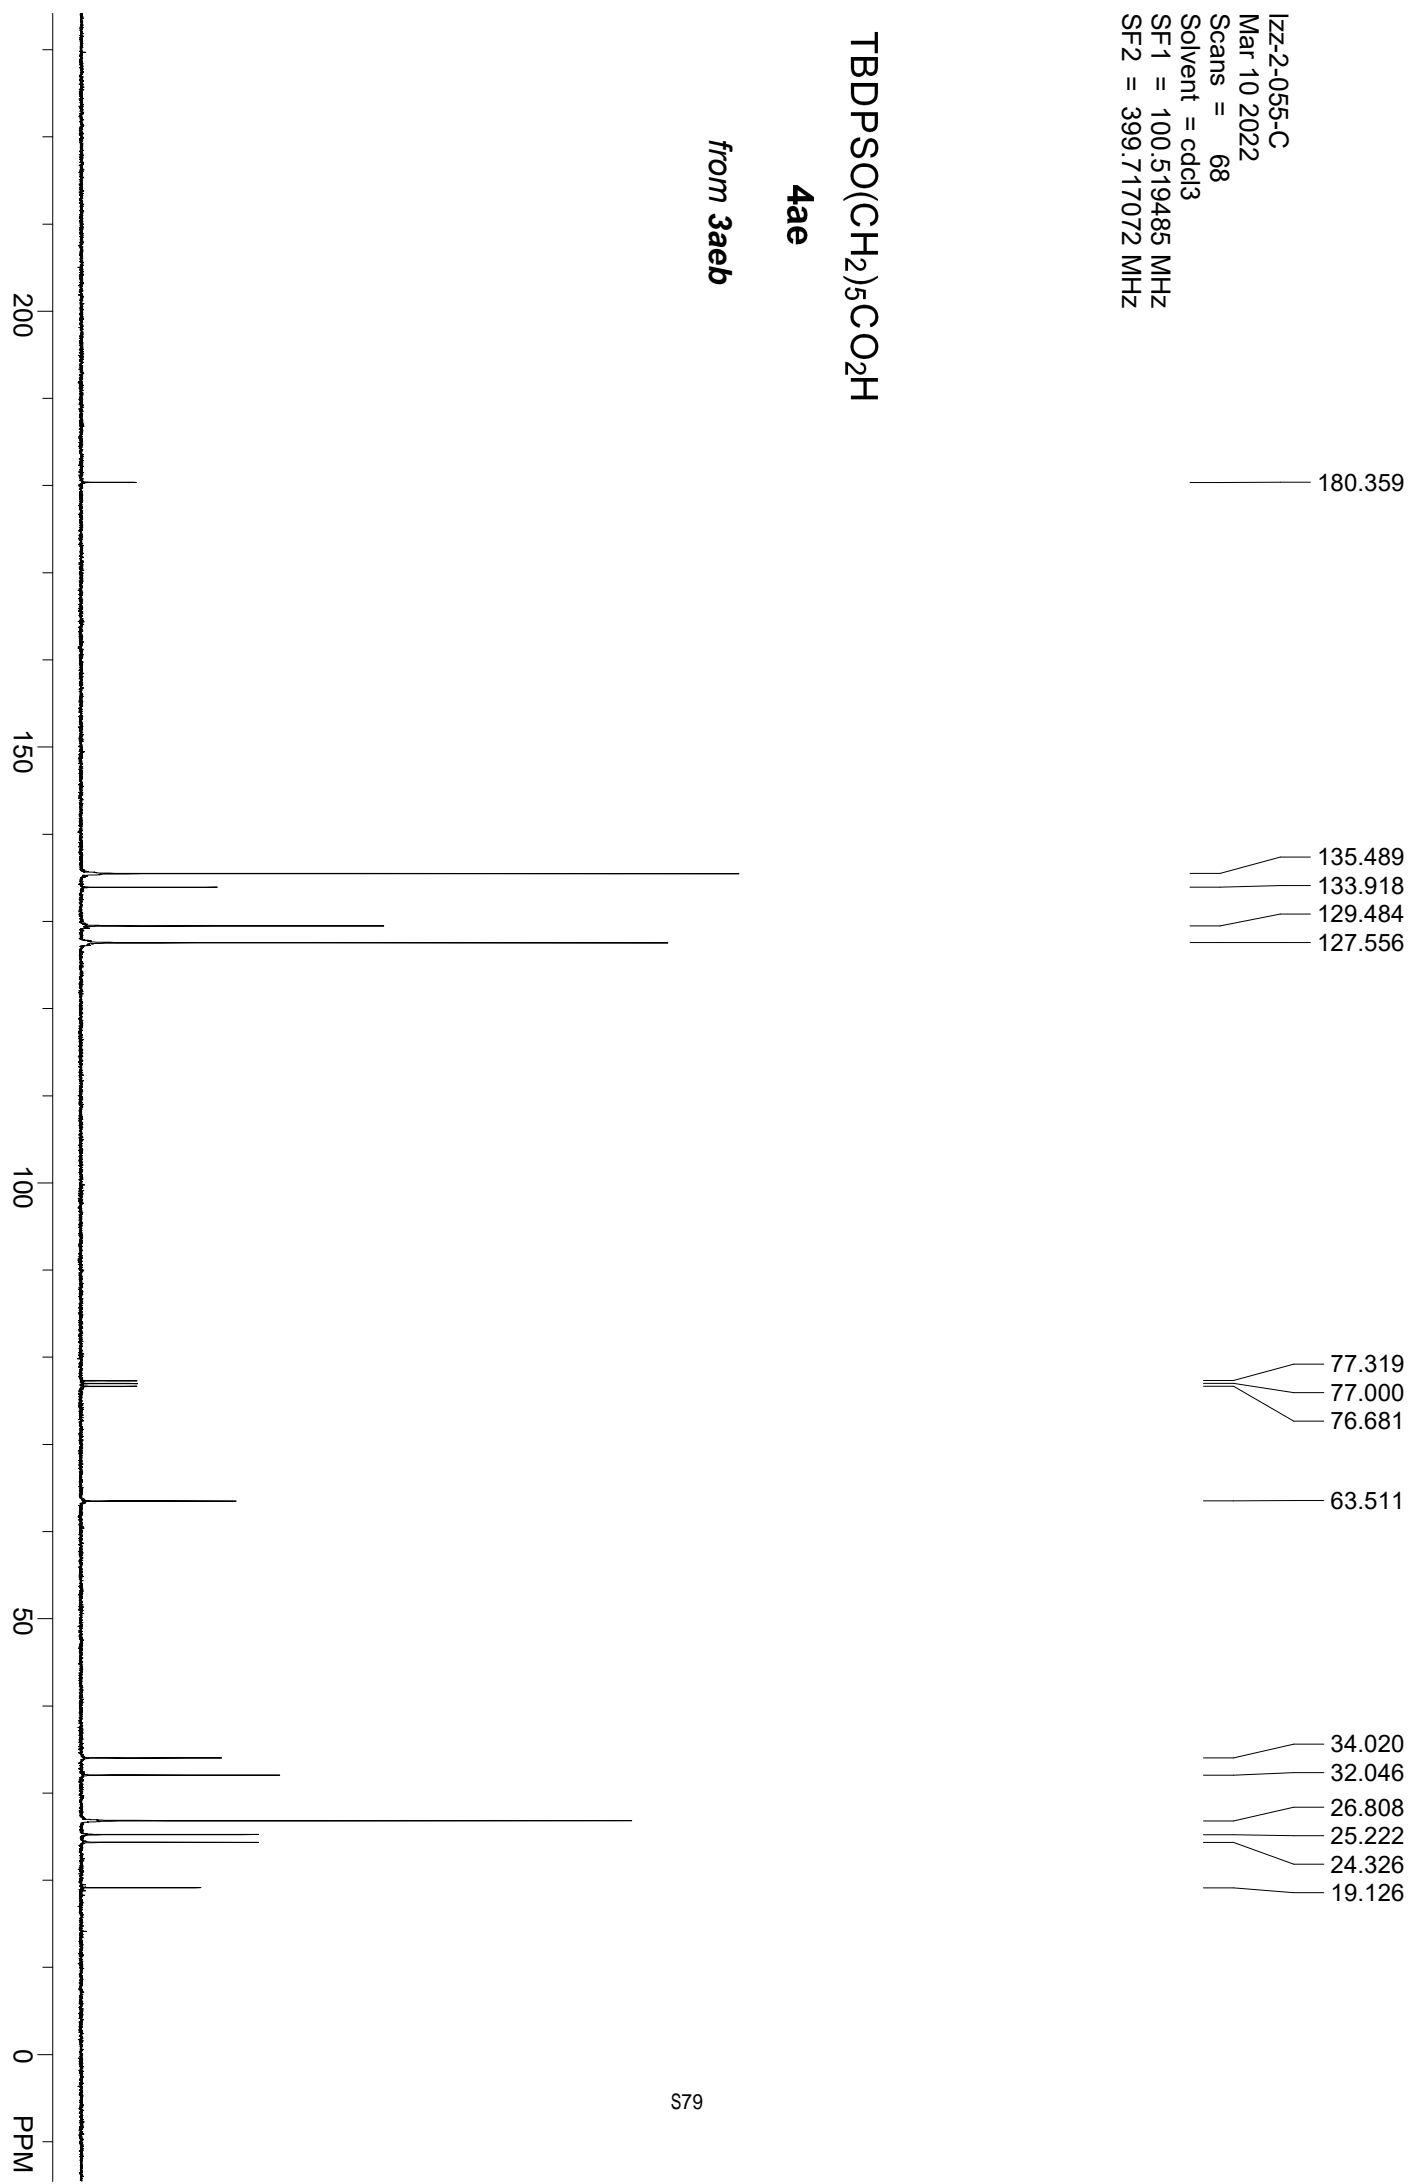

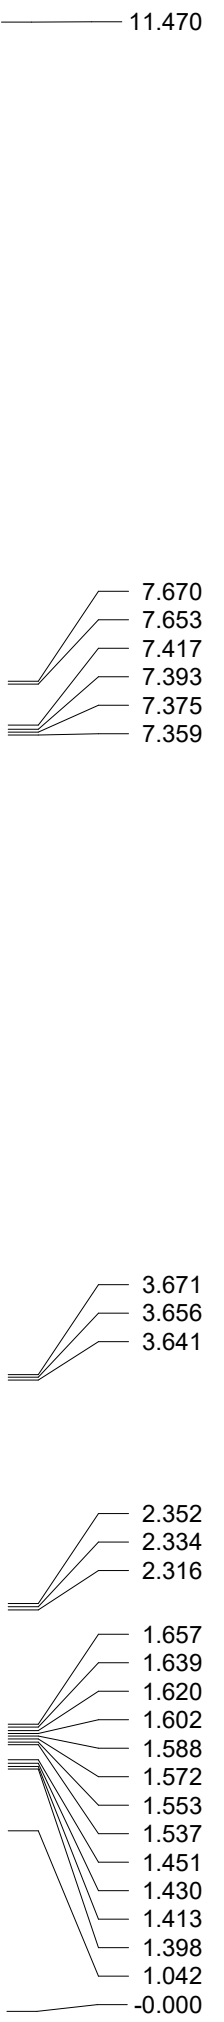

lzz-2-031-H  
Feb 25 2022  
Scans = 4  
Solvent = CDCl3  
SF1 = 399.717865 MHz  
SF2 = 100.517960 MHz

TBDPSO(CH<sub>2</sub>)<sub>5</sub>CO<sub>2</sub>H

**4ae**

from 3aec

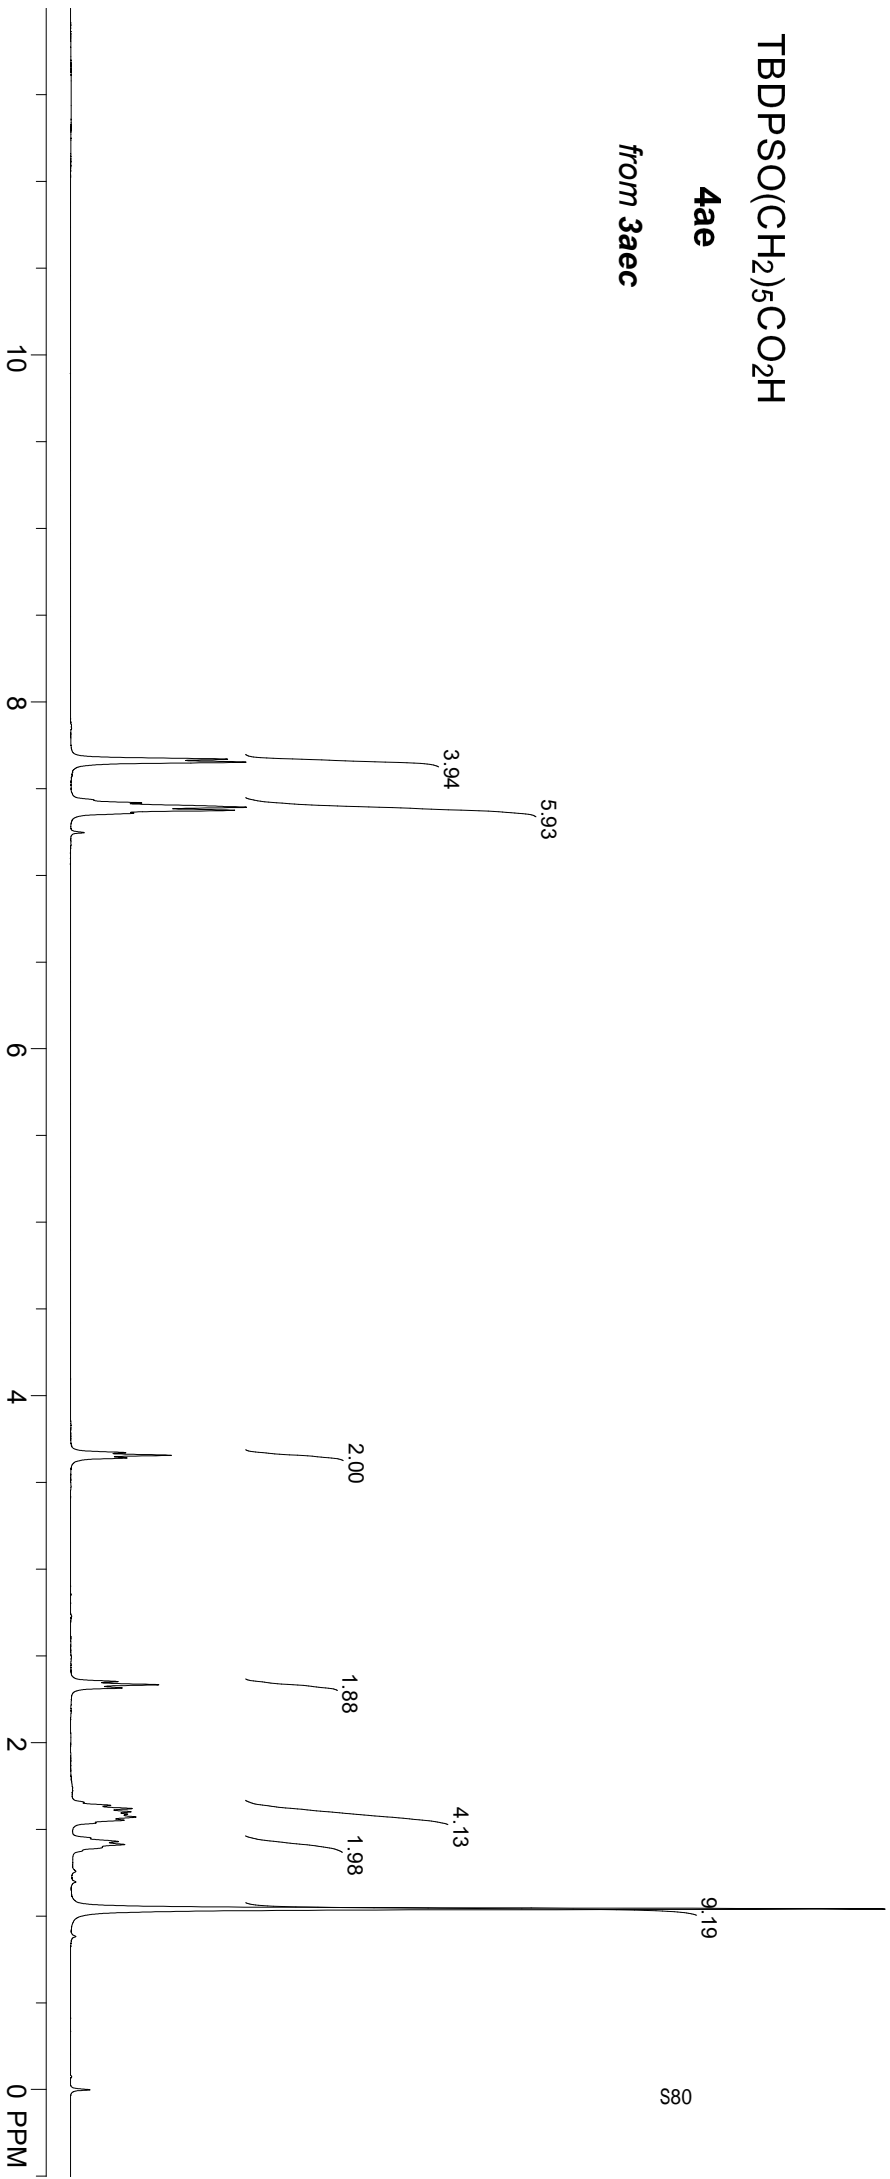



Izz-2-031-C  
Feb 25 2022  
Scans = 68  
Solvent = cdcl3  
SF1 = 100.598389 MHz  
SF2 = 400.030792 MHz

TBDPSO(CH<sub>2</sub>)<sub>5</sub>CO<sub>2</sub>H

**4ae**

*from 3aec*

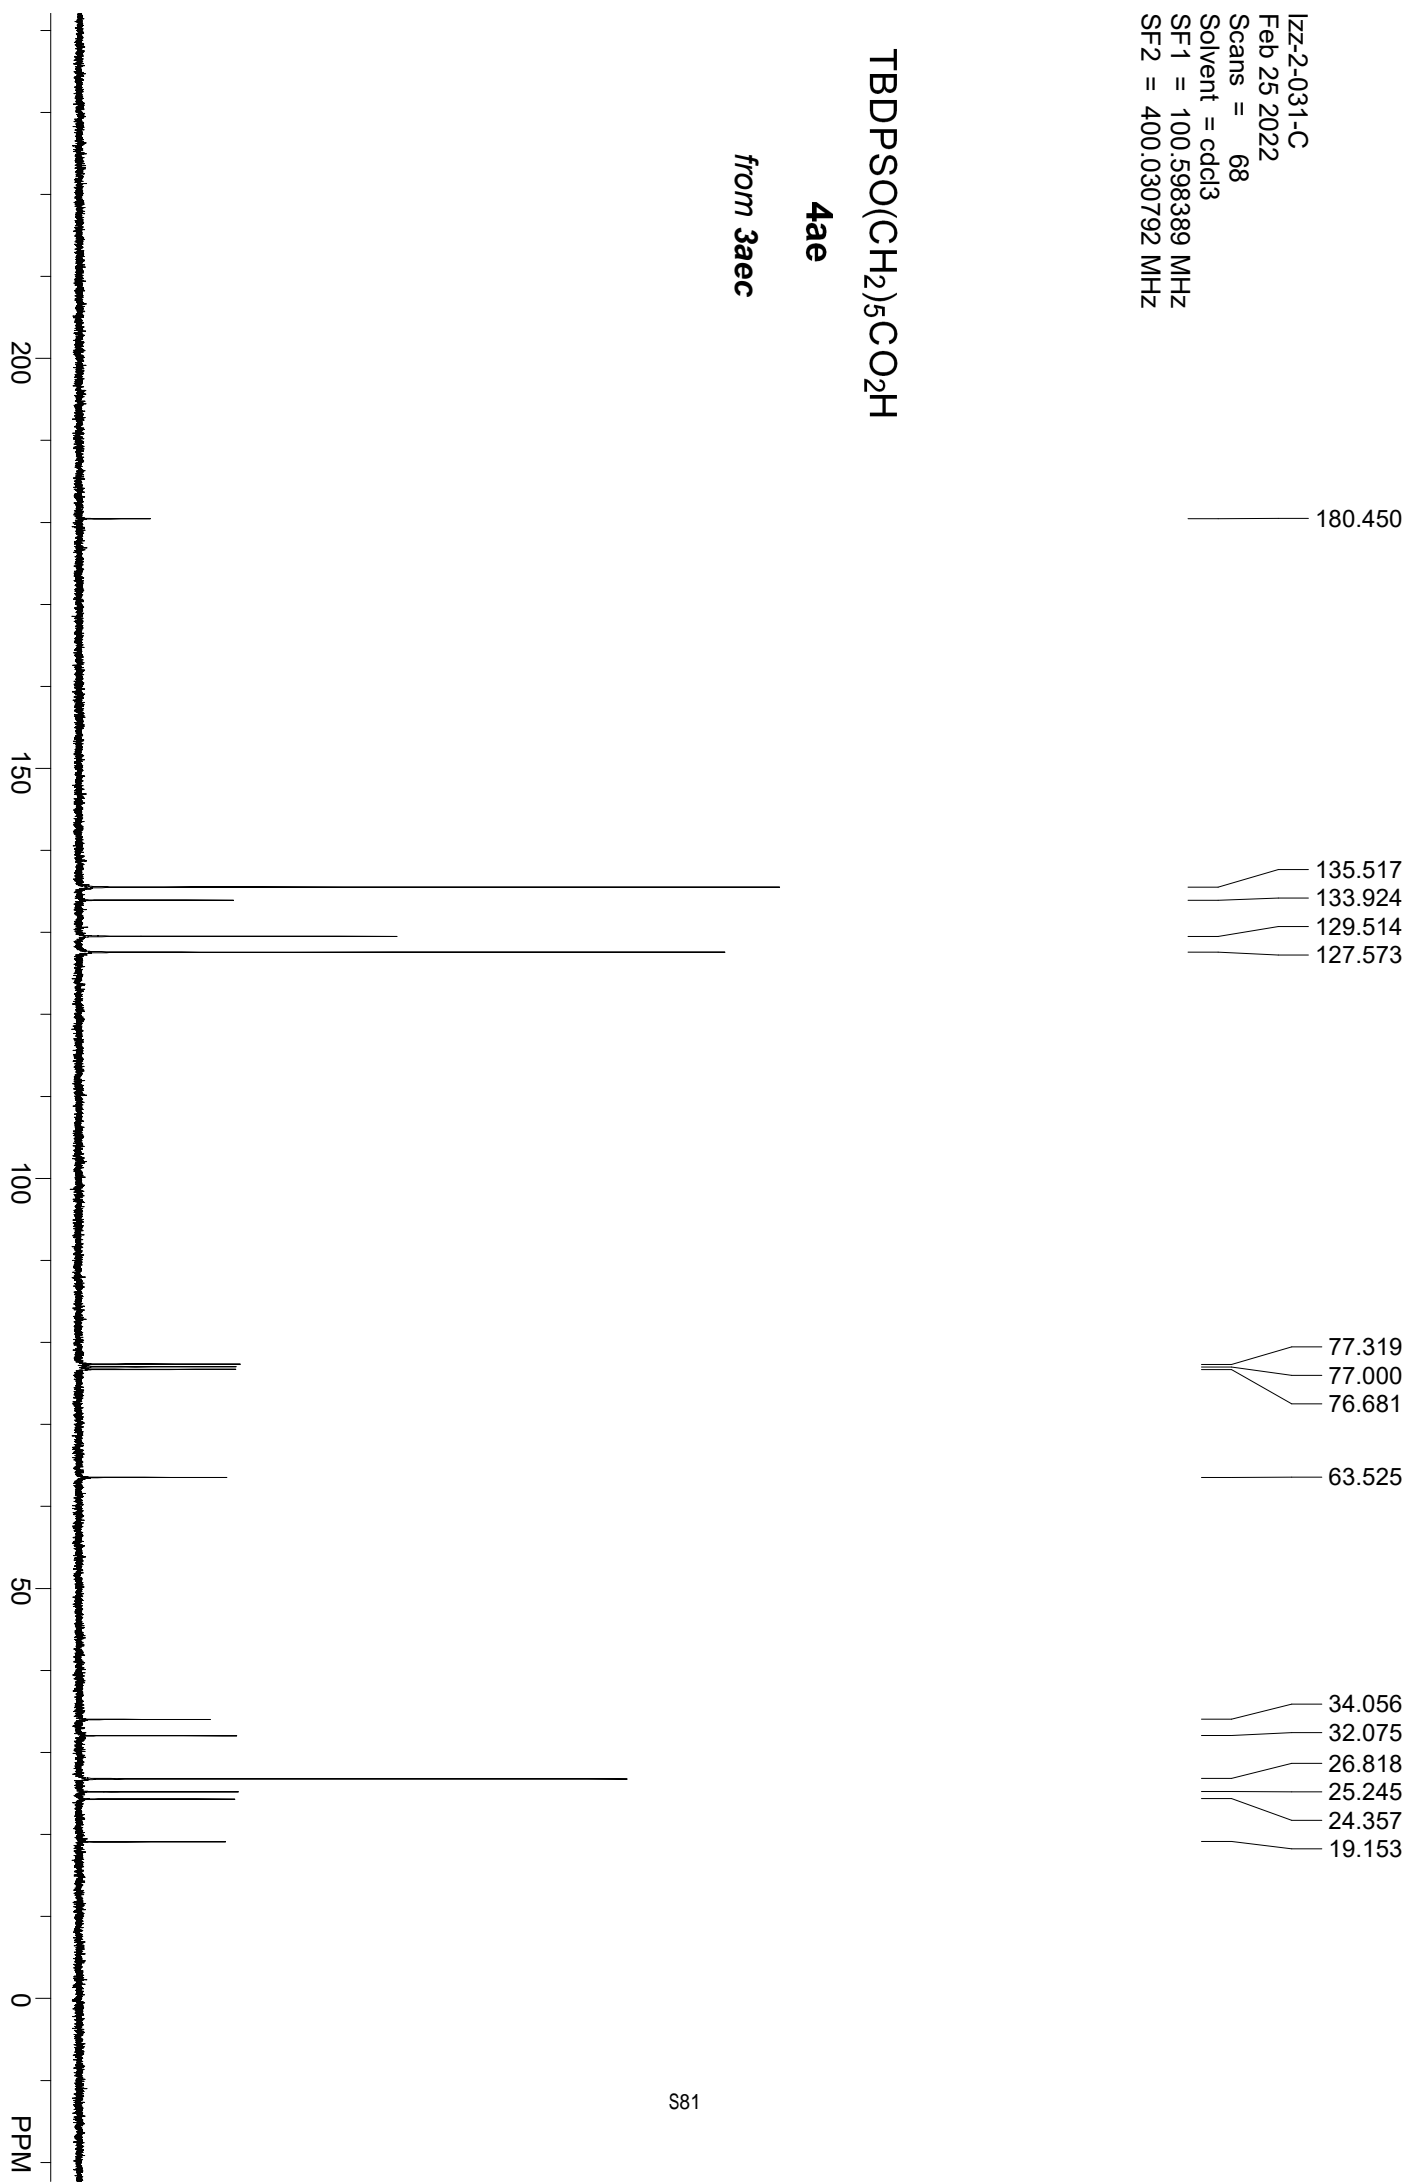

IZZ-2-033-H  
Feb 25 2022  
Scans = 4  
Solvent = CDCl3  
SF1 = 400.031616 MHz  
SF2 = 100.596855 MHz

TBDPSO(CH<sub>2</sub>)<sub>5</sub>CO<sub>2</sub>H

4ae

from 3aed

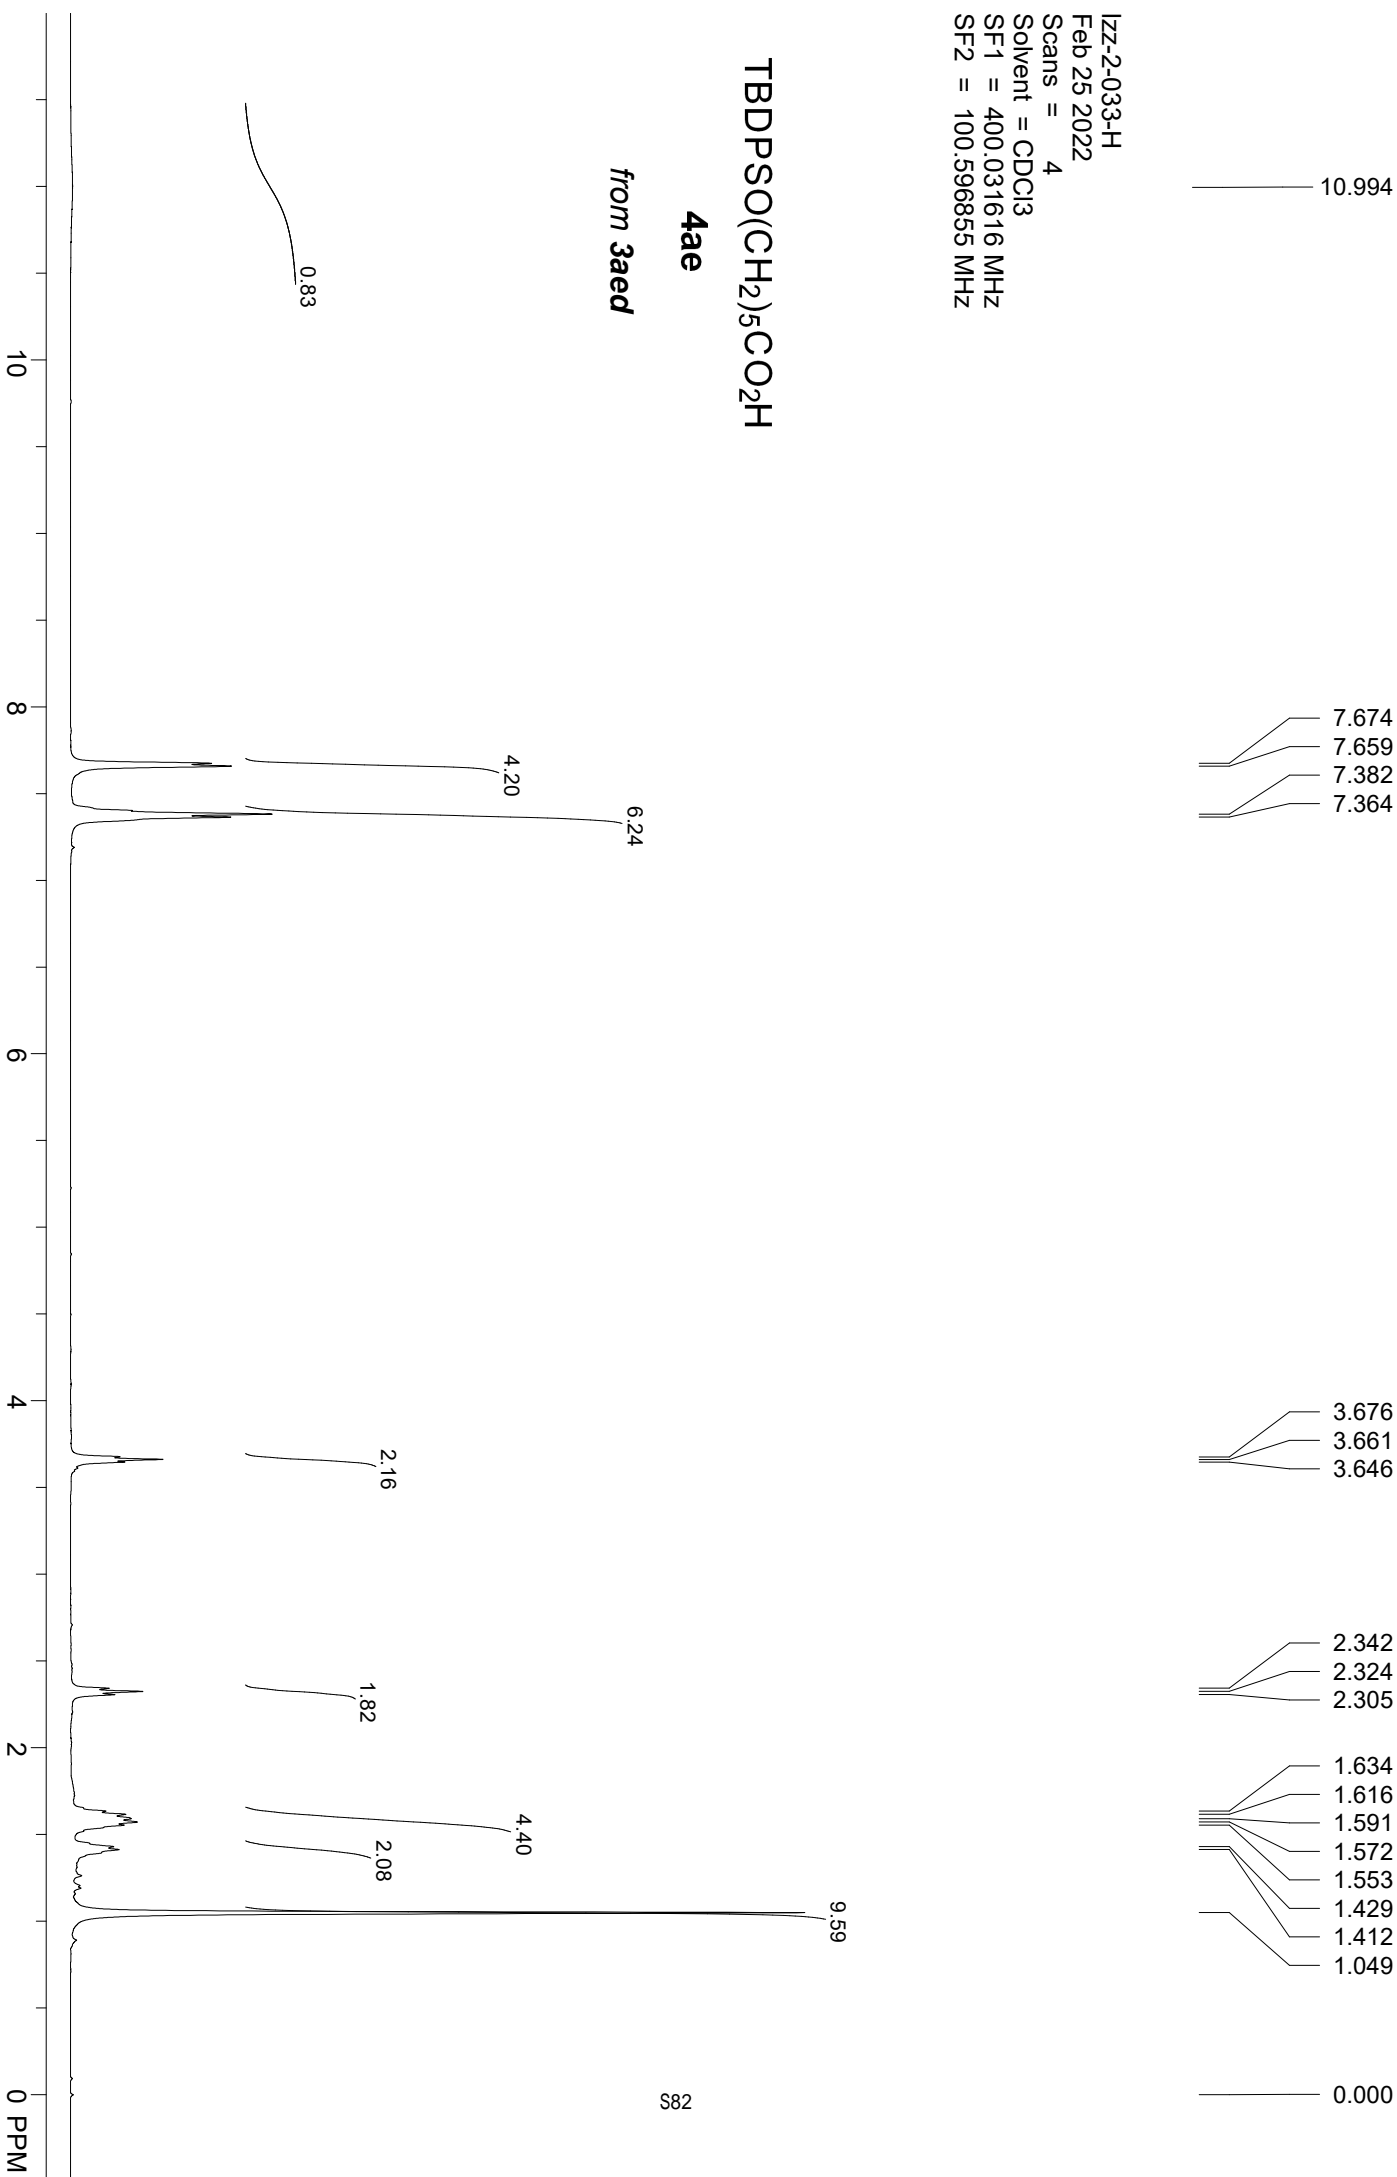

IZZ-2-033-C  
Feb 25 2022  
Scans = 72  
Solvent = cdcl3  
SF1 = 100.598389 MHz  
SF2 = 400.030792 MHz

TBDPSO(CH<sub>2</sub>)<sub>5</sub>CO<sub>2</sub>H

4ae

from 3aed

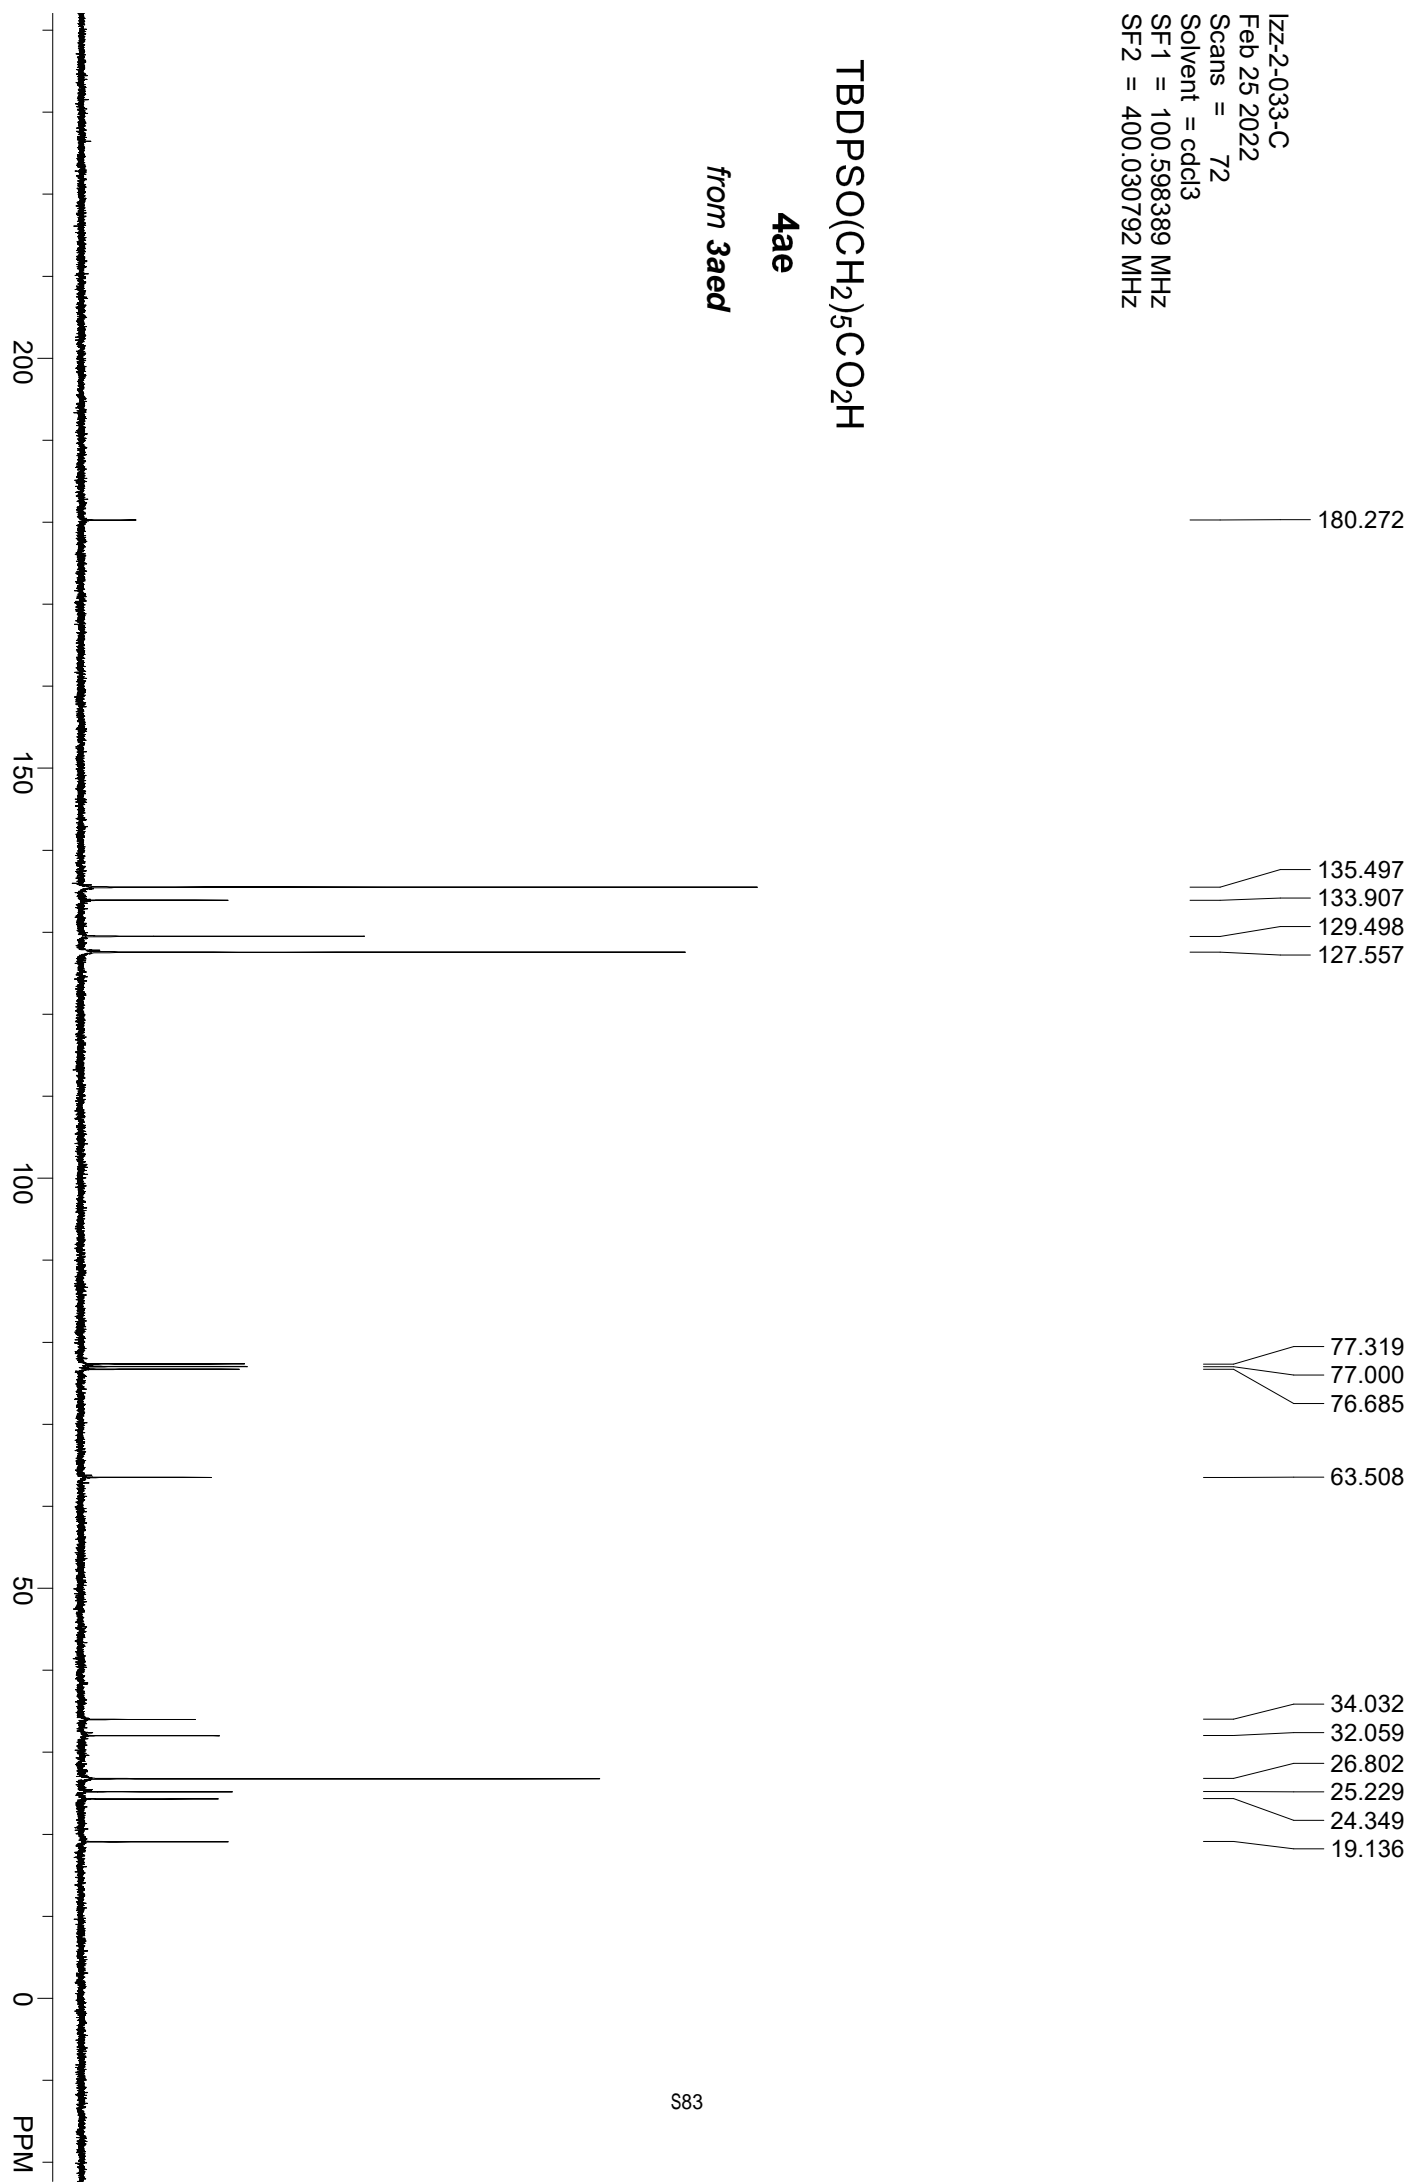

Izz-2-022-H  
Feb 21 2022  
Scans = 8  
Solvent = CDCl3  
SF1 = 400.031616 MHz  
SF2 = 100.596855 MHz

TIPSO(CH<sub>2</sub>)<sub>5</sub>CO<sub>2</sub>H  
4af

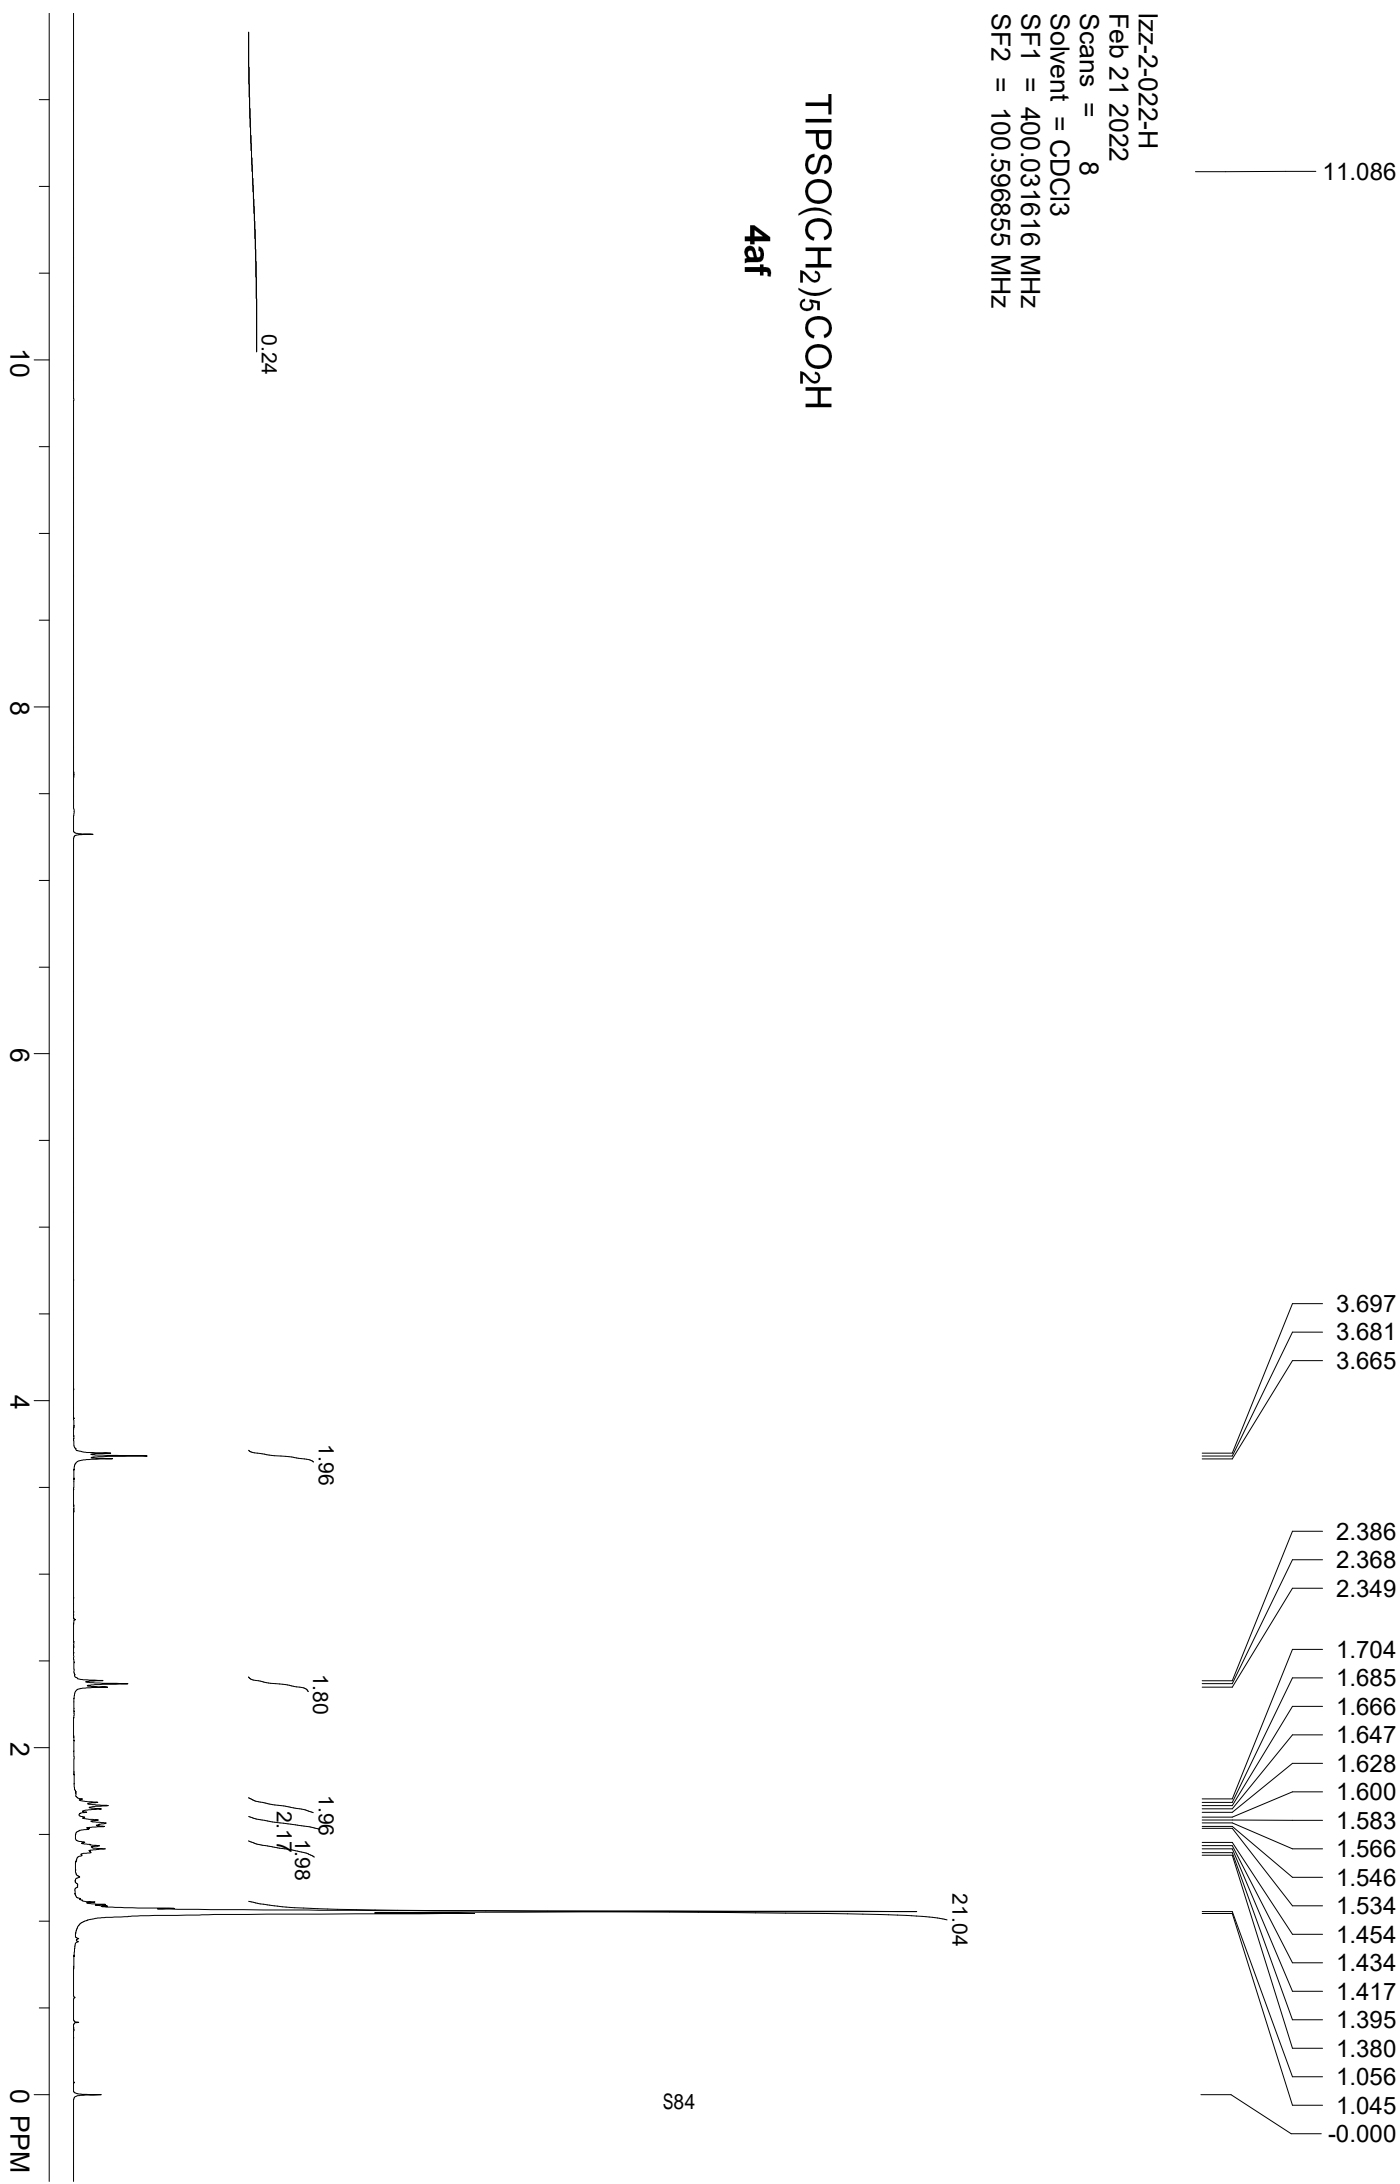

IZZ-2-022-C  
Feb 23 2022  
Scans = 212  
Solvent = cdcl3  
SF1 = 100.519485 MHz  
SF2 = 399.717072 MHz

TIPSO(CH<sub>2</sub>)<sub>5</sub>CO<sub>2</sub>H

4af

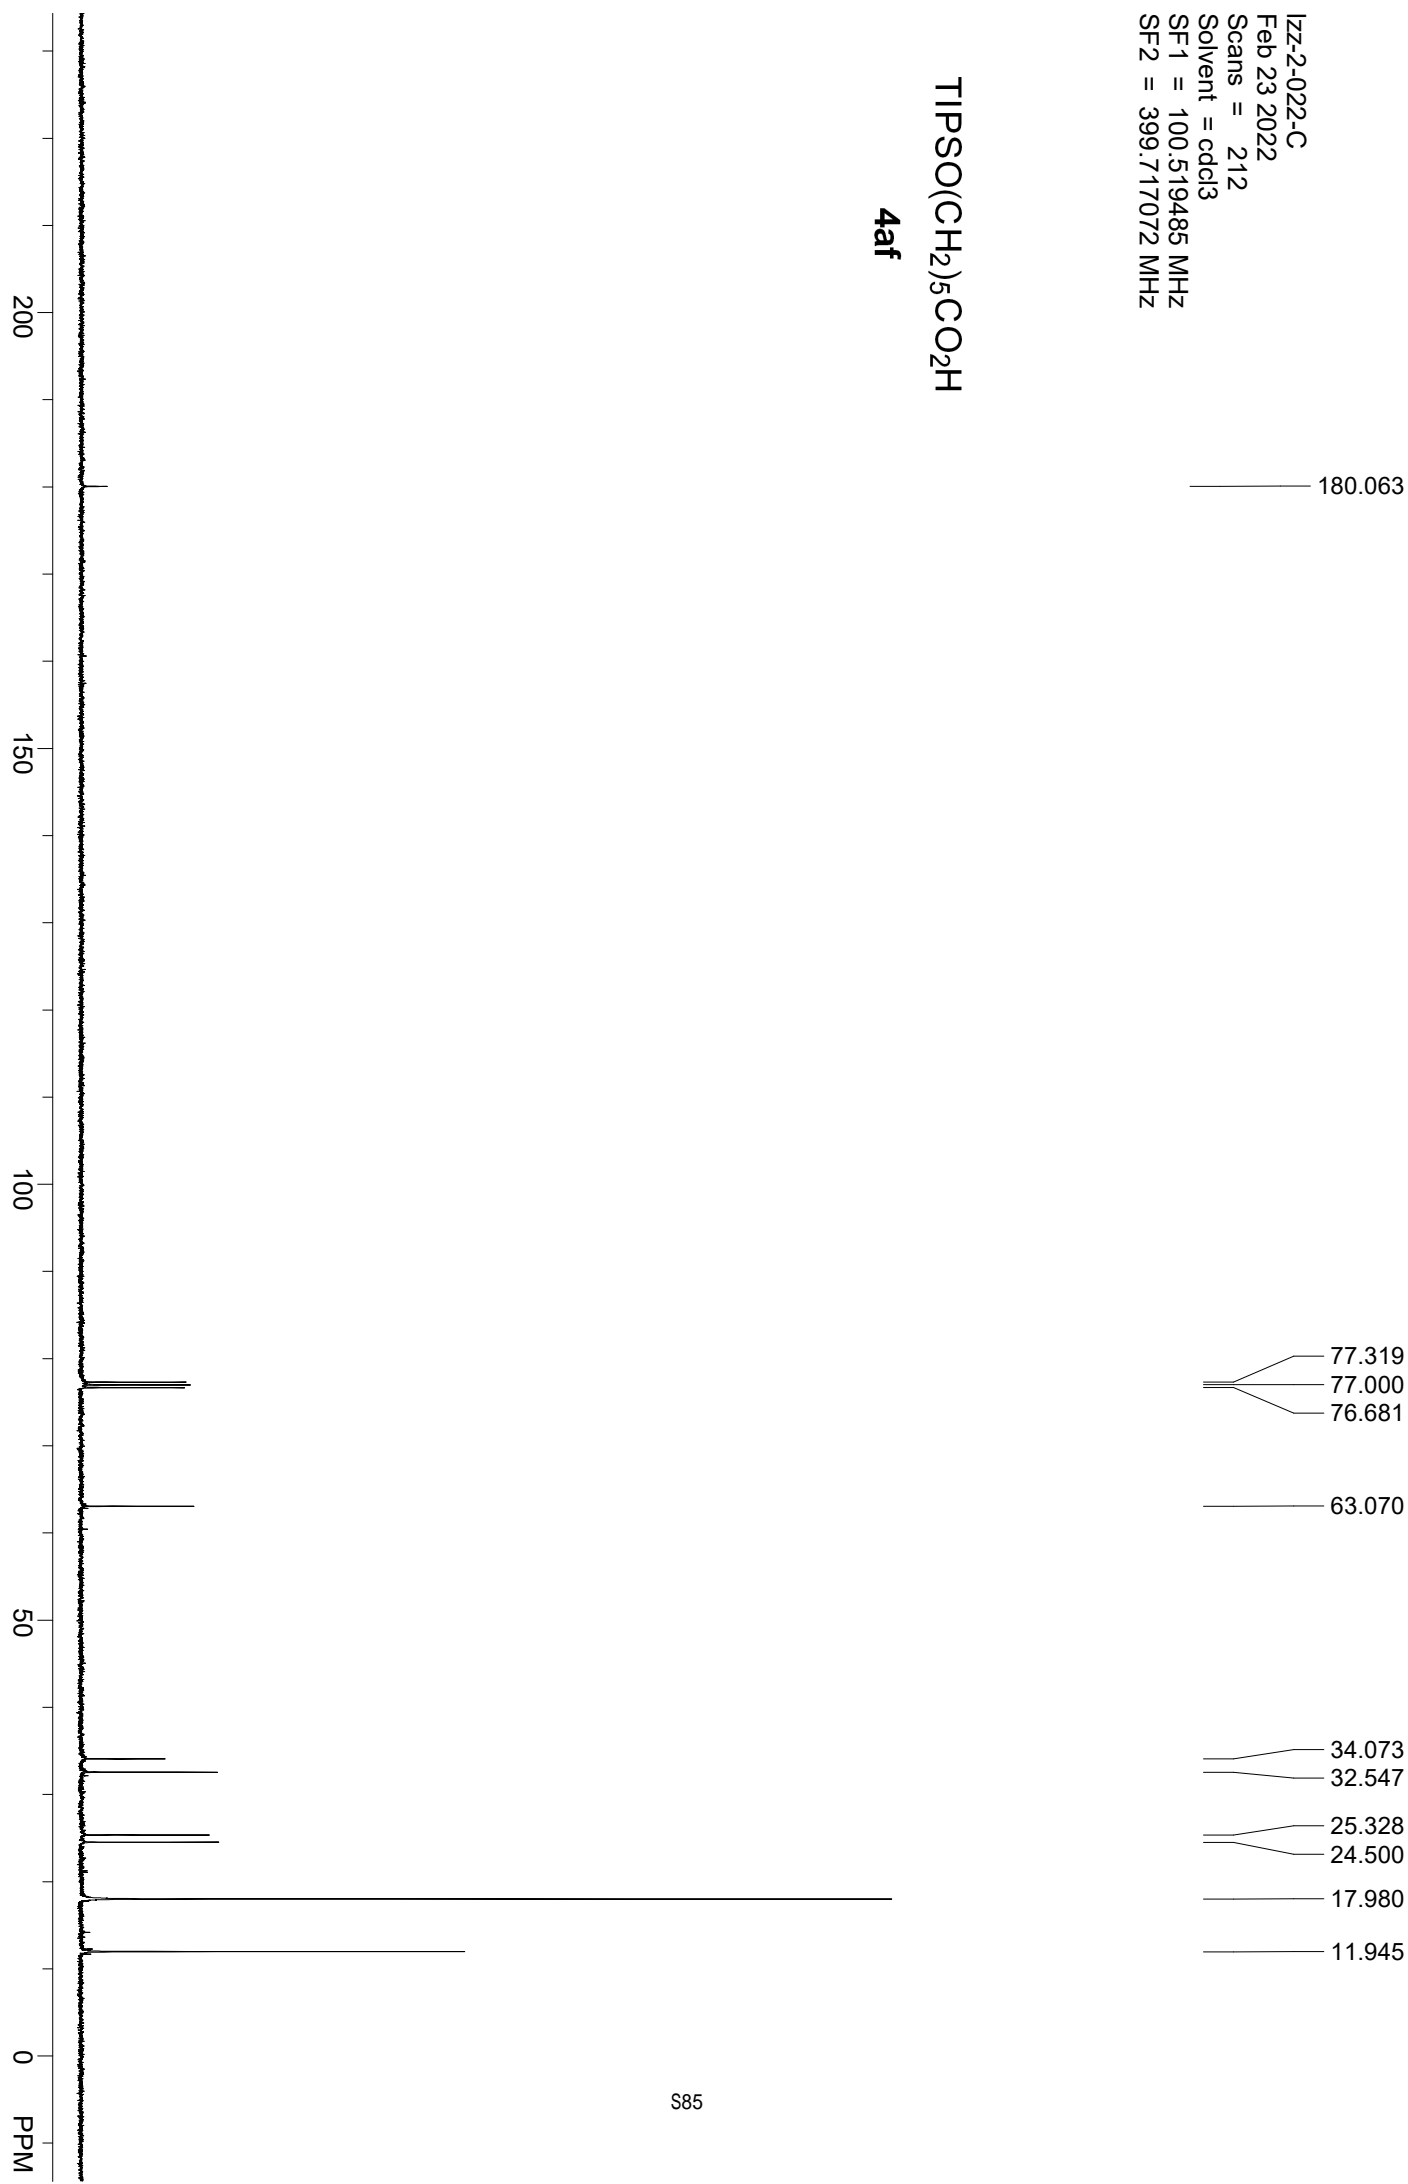

Izz-2-027B-H  
Feb 22 2022  
Scans = 4  
Solvent = CDCl3  
SF1 = 399.717865 MHz  
SF2 = 100.517960 MHz

TIPSO(CH<sub>2</sub>)<sub>4</sub>CO<sub>2</sub>H  
4bf

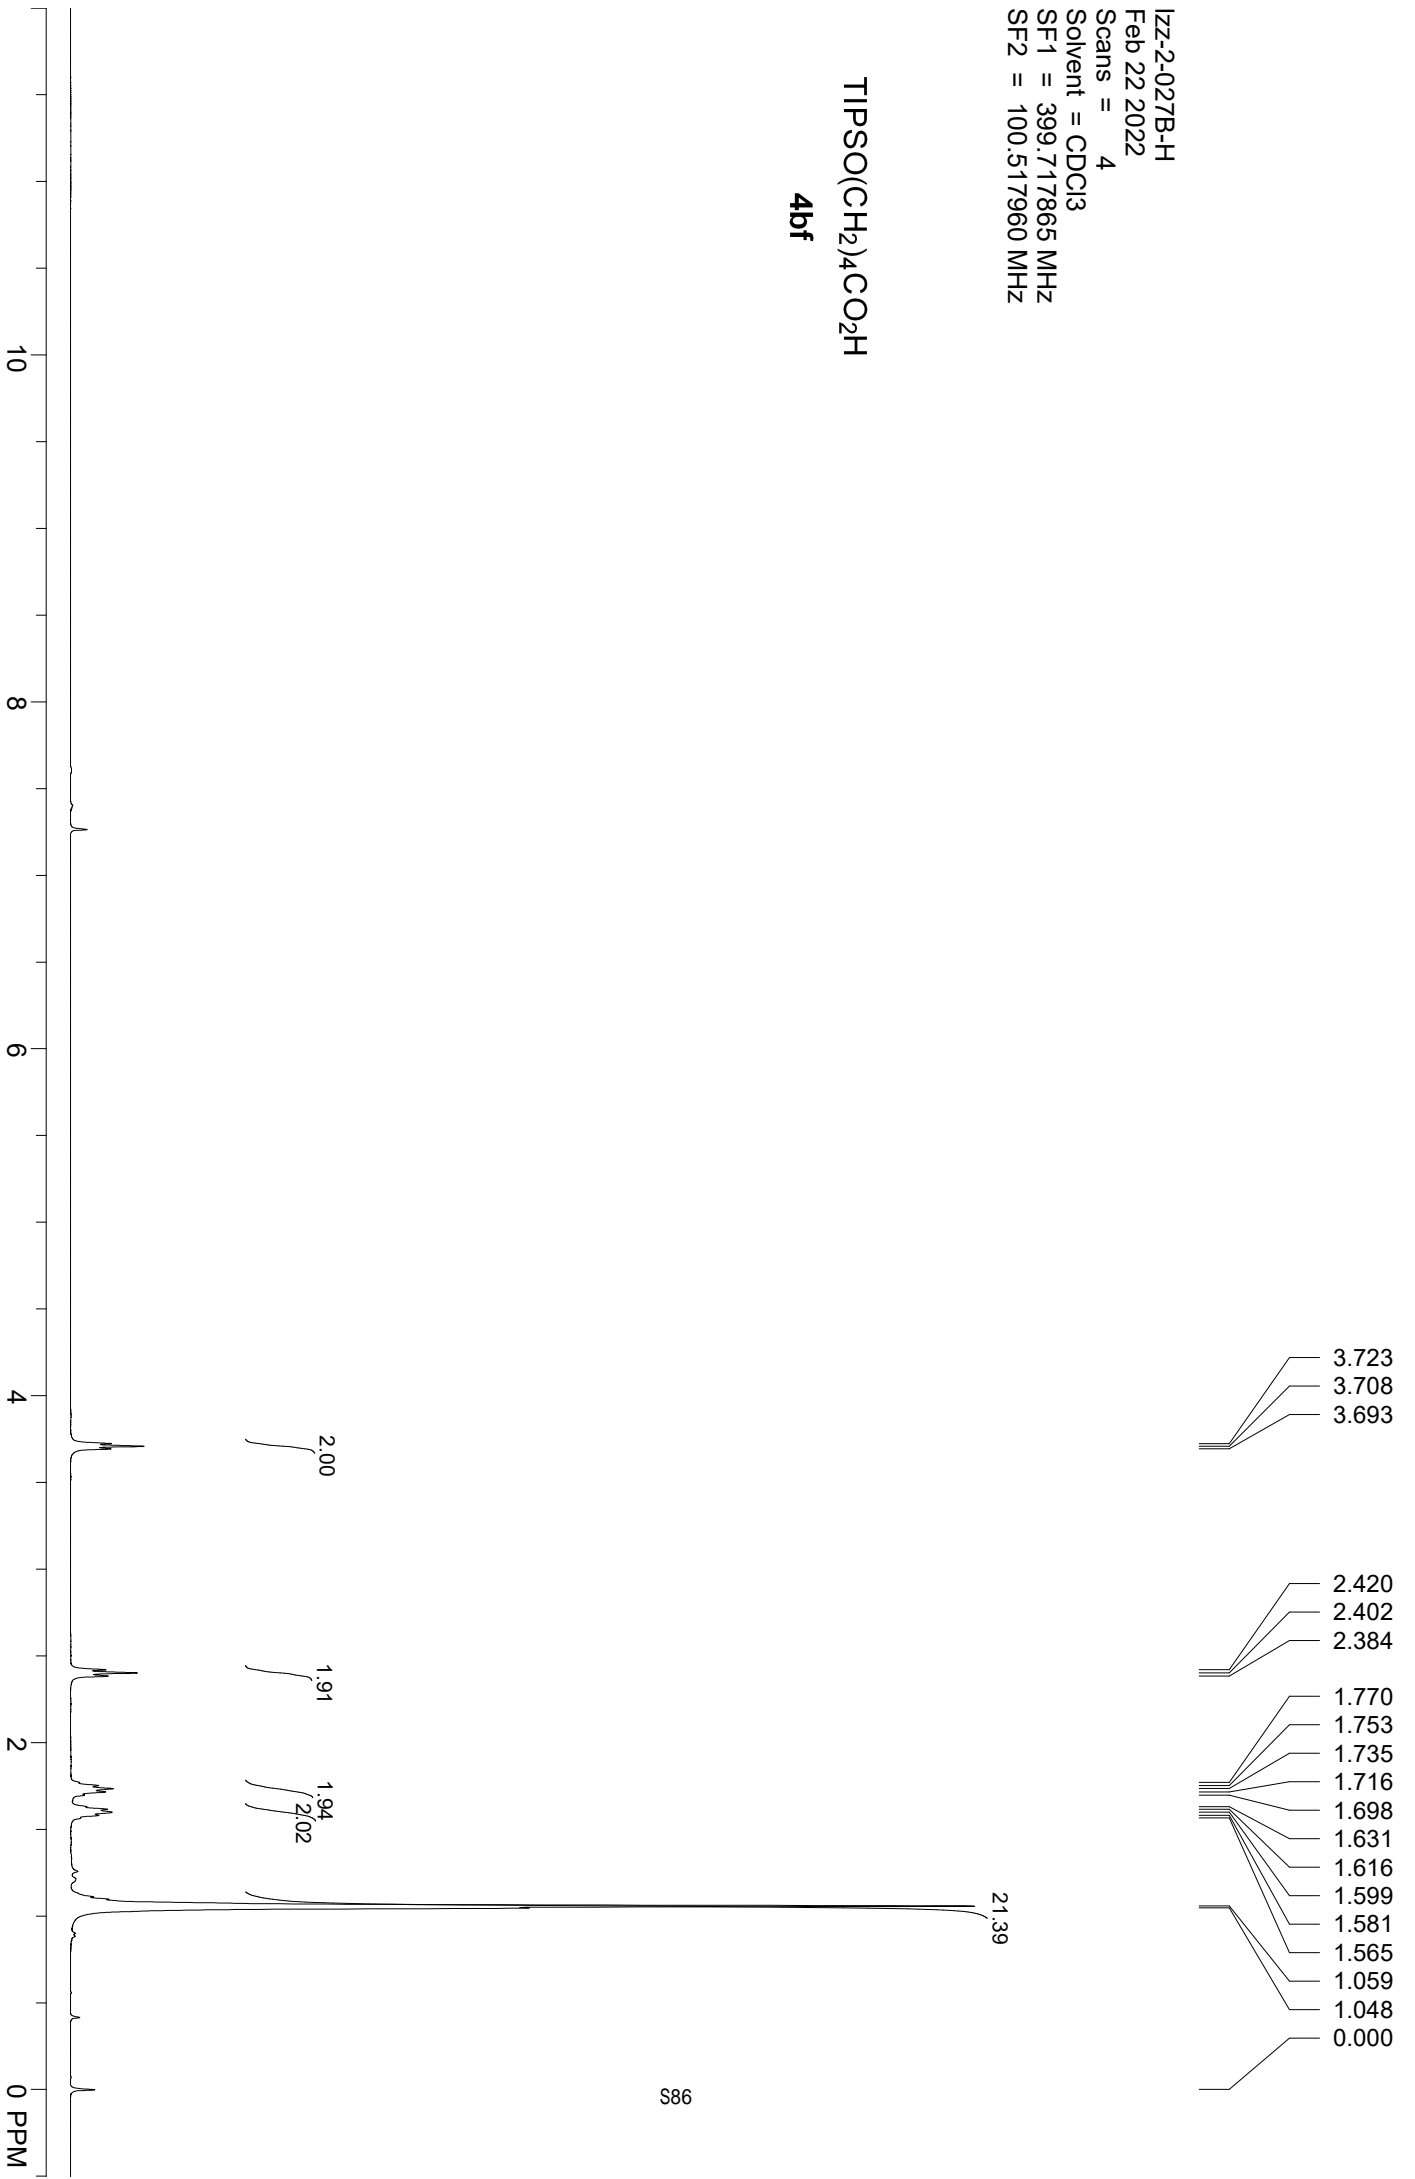

IZZ-2-027B-C  
Feb 23 2022  
Scans = 40  
Solvent = cdcl3  
SF1 = 100.519485 MHz  
SF2 = 399.717072 MHz

TIPSO(CH<sub>2</sub>)<sub>4</sub>CO<sub>2</sub>H  
**4bf**

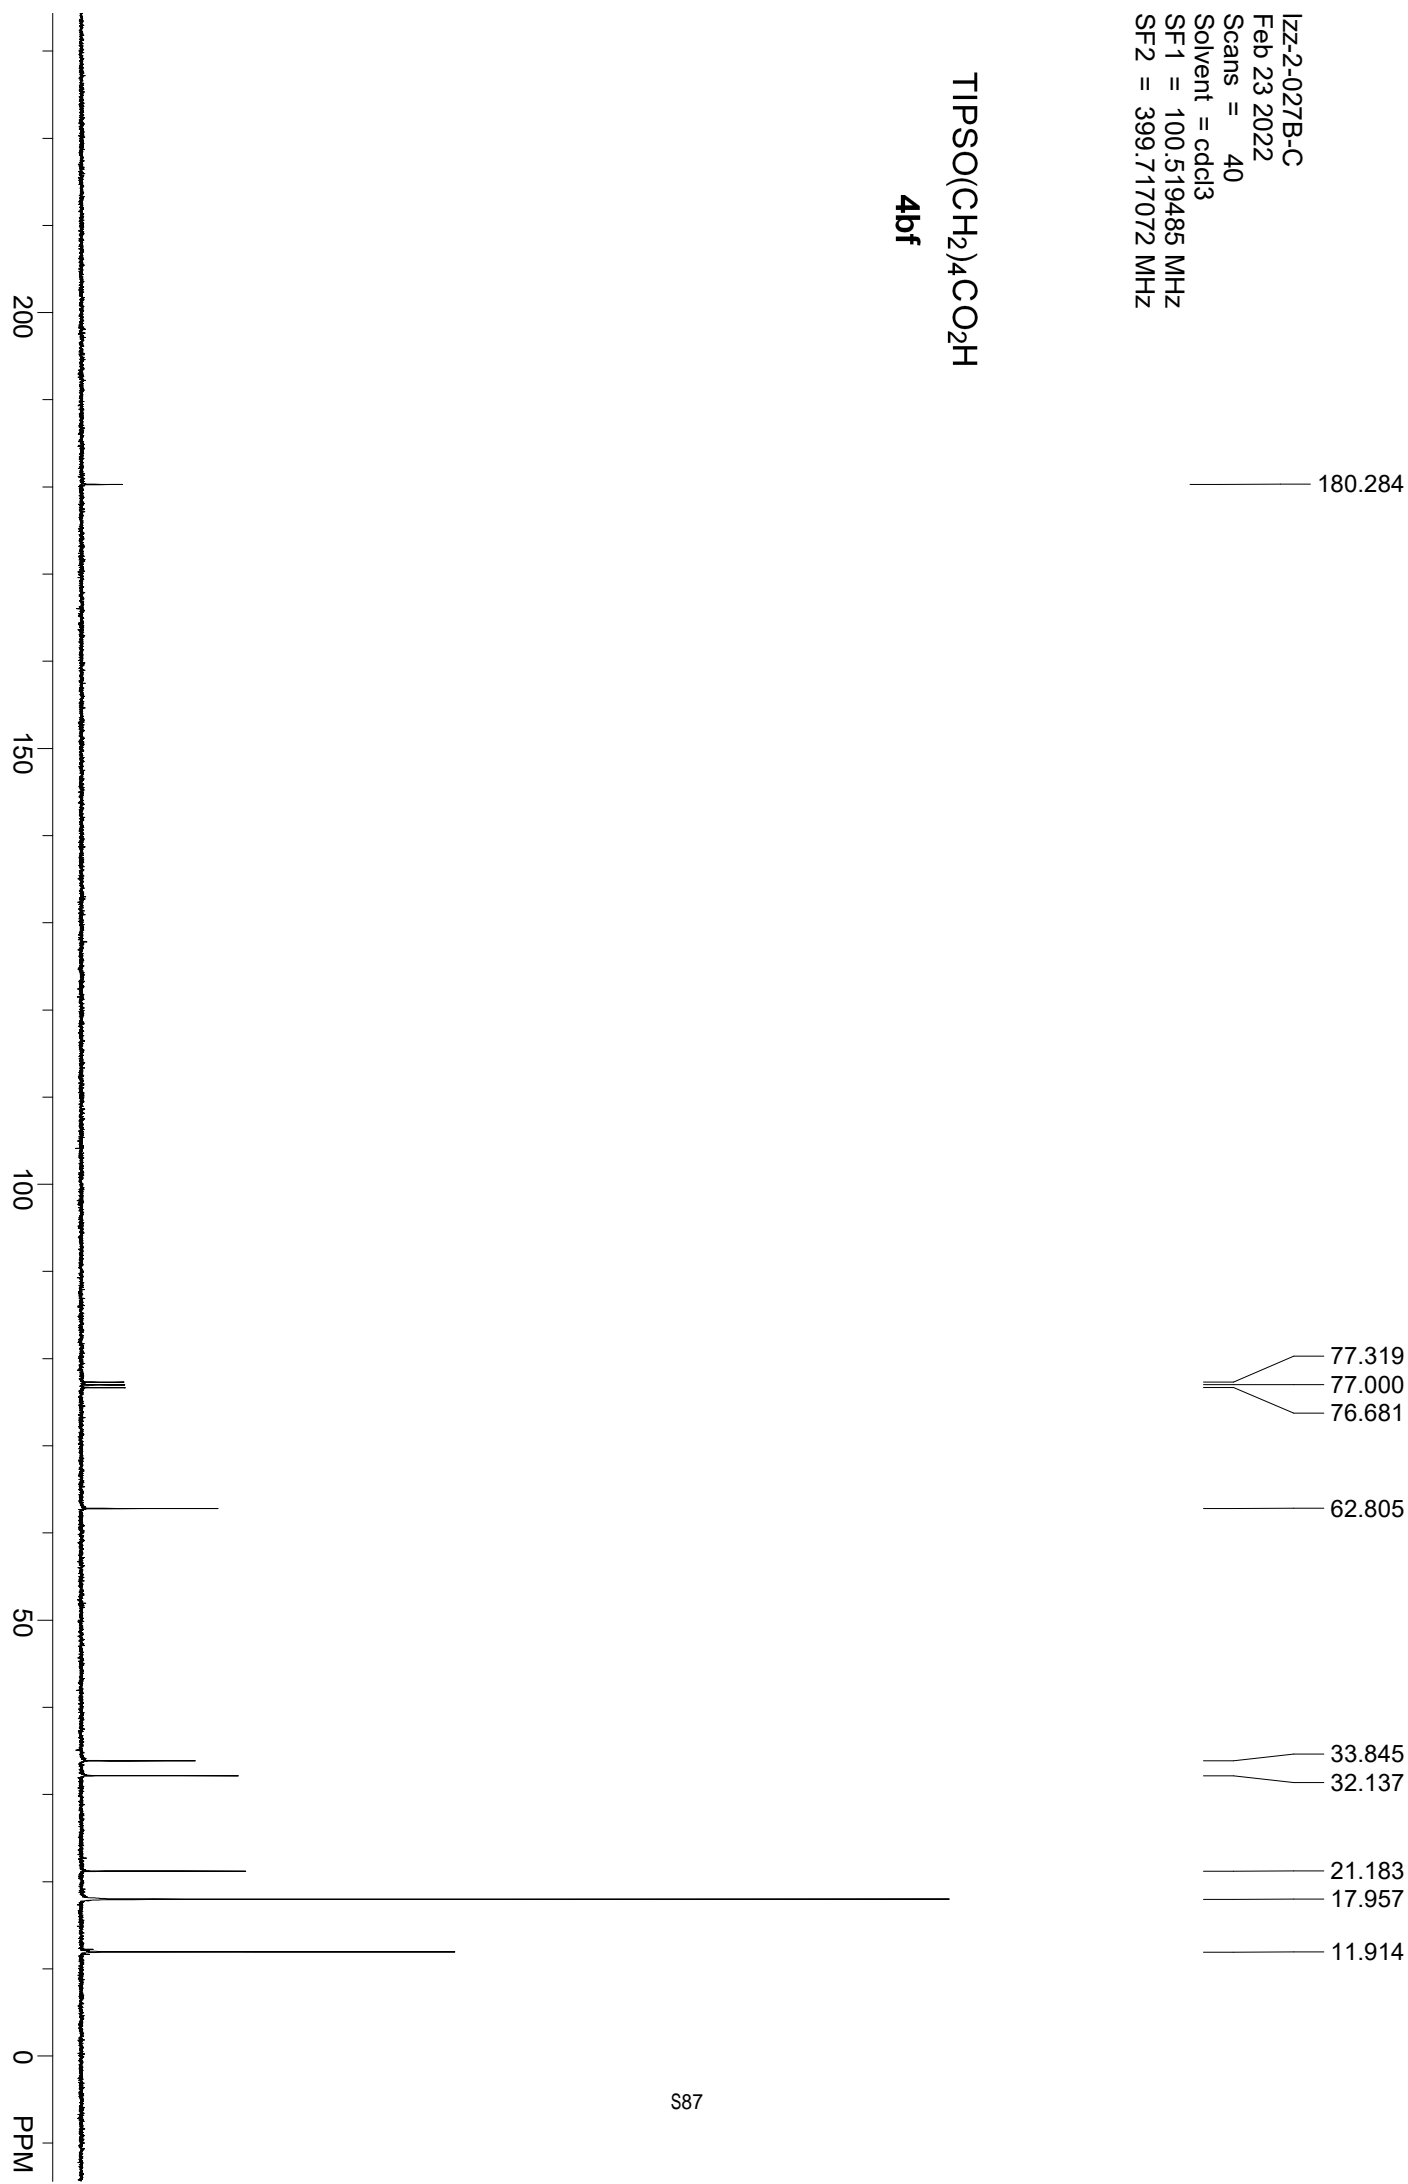

lzz-3-192-H  
Jan 3 2023  
Scans = 16  
Solvent = CDCl<sub>3</sub>  
SF1 = 400.031616 MHz  
SF2 = 100.596855 MHz

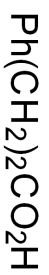

**2c**

*with air balloon*

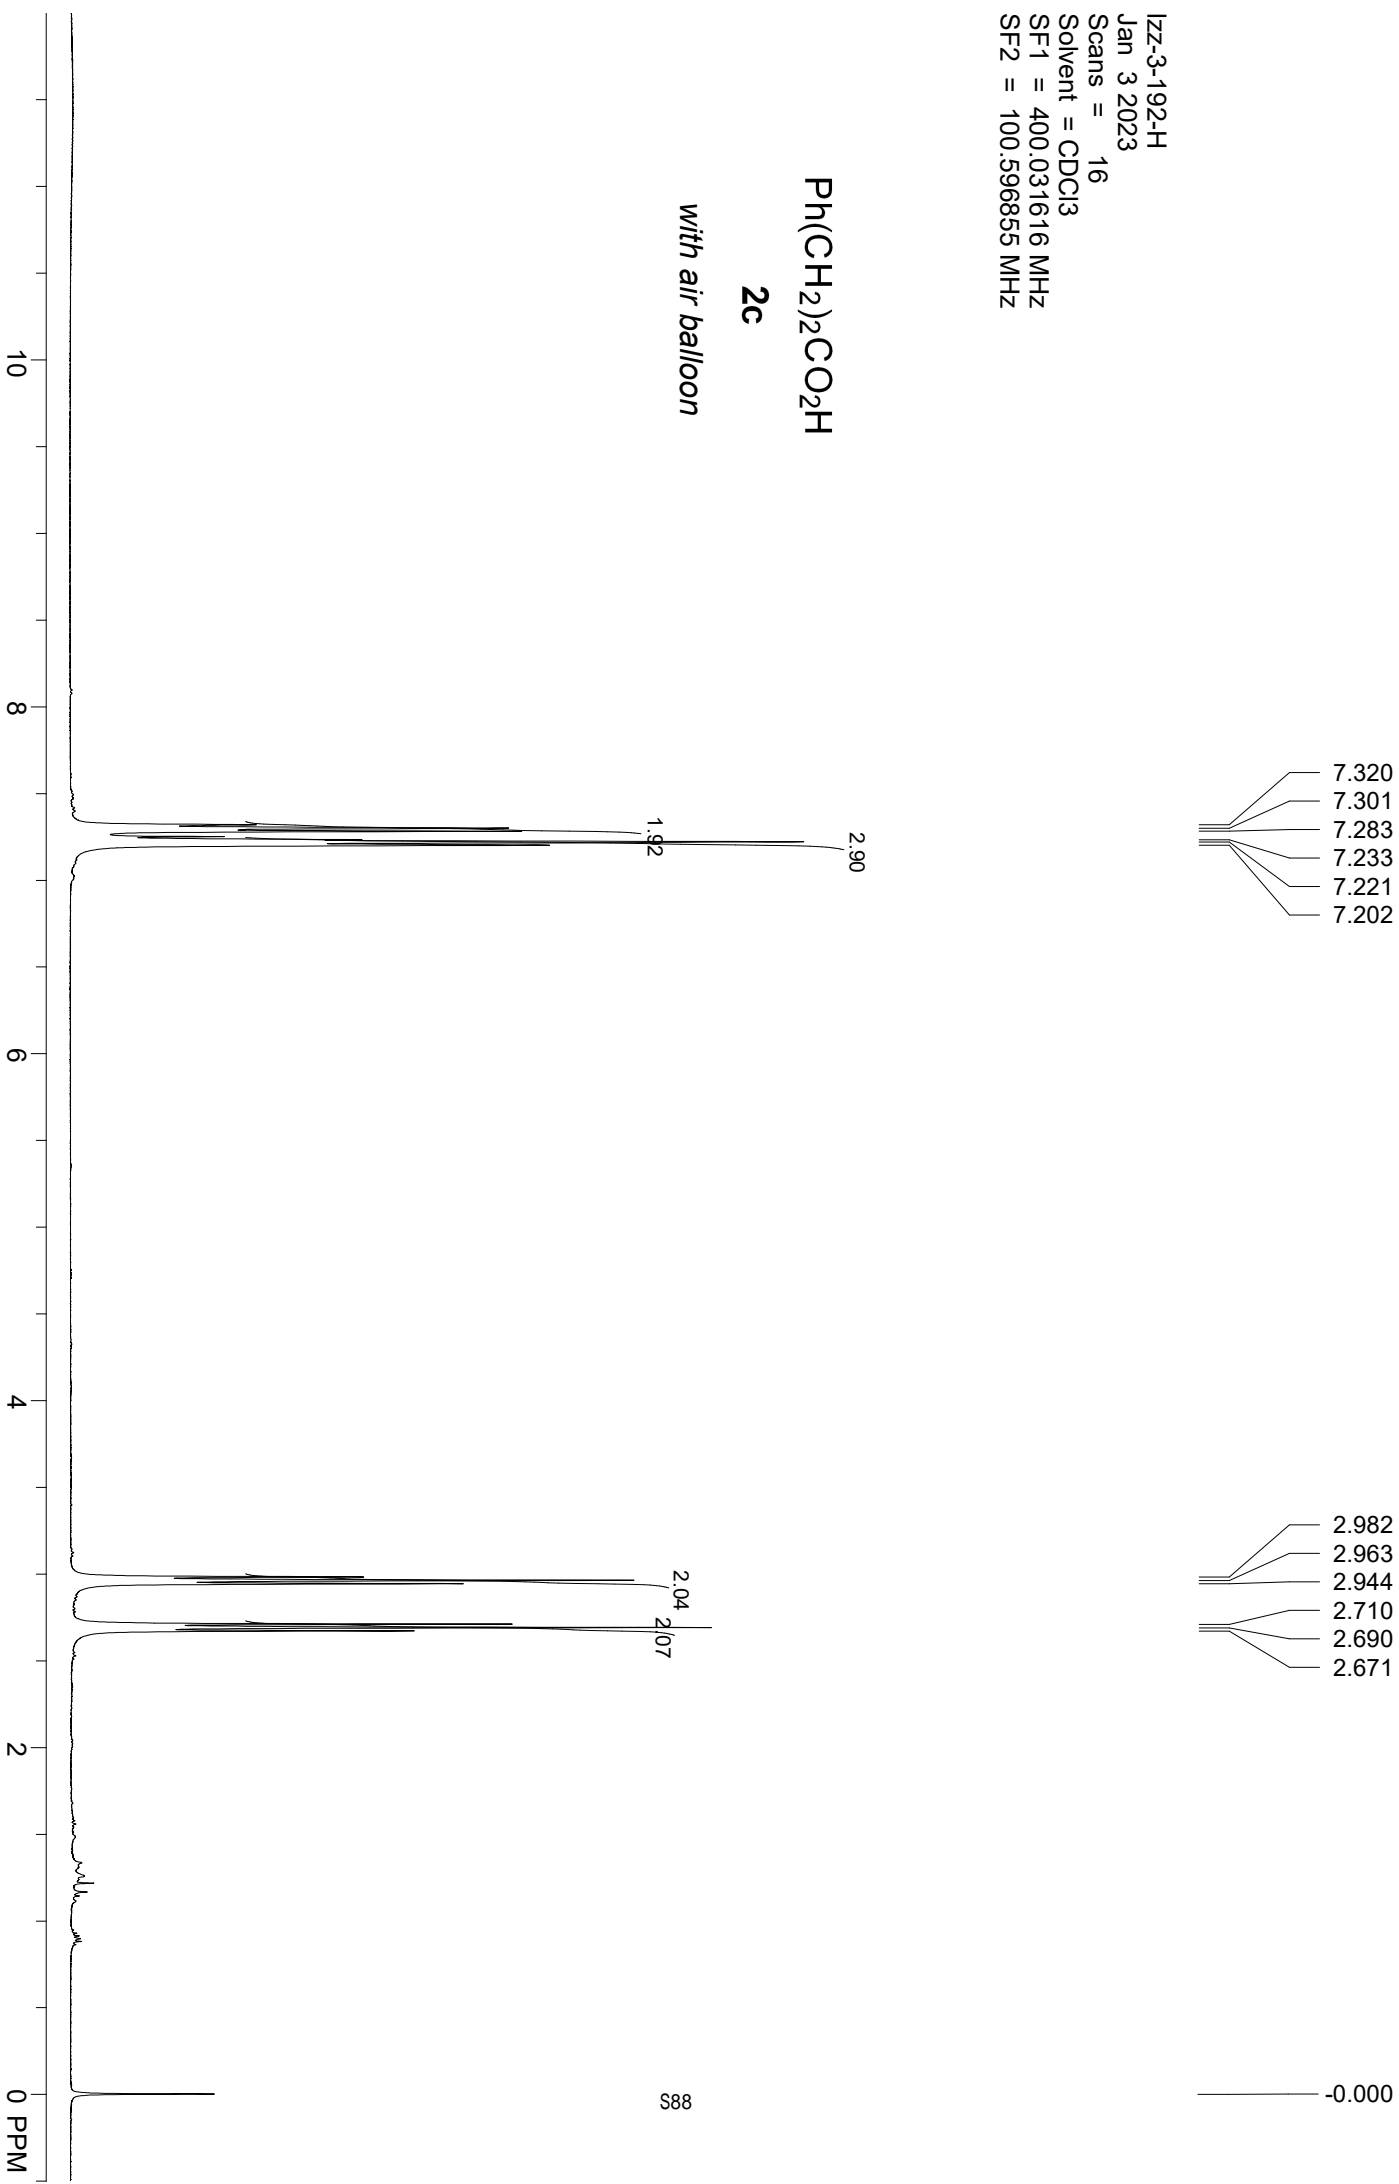



Izz-3-192-C  
Jan 3 2023  
Scans = 48  
Solvent = cdcl3  
SF1 = 100.598389 MHz  
SF2 = 400.030792 MHz

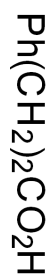

**2c**

*with air balloon*

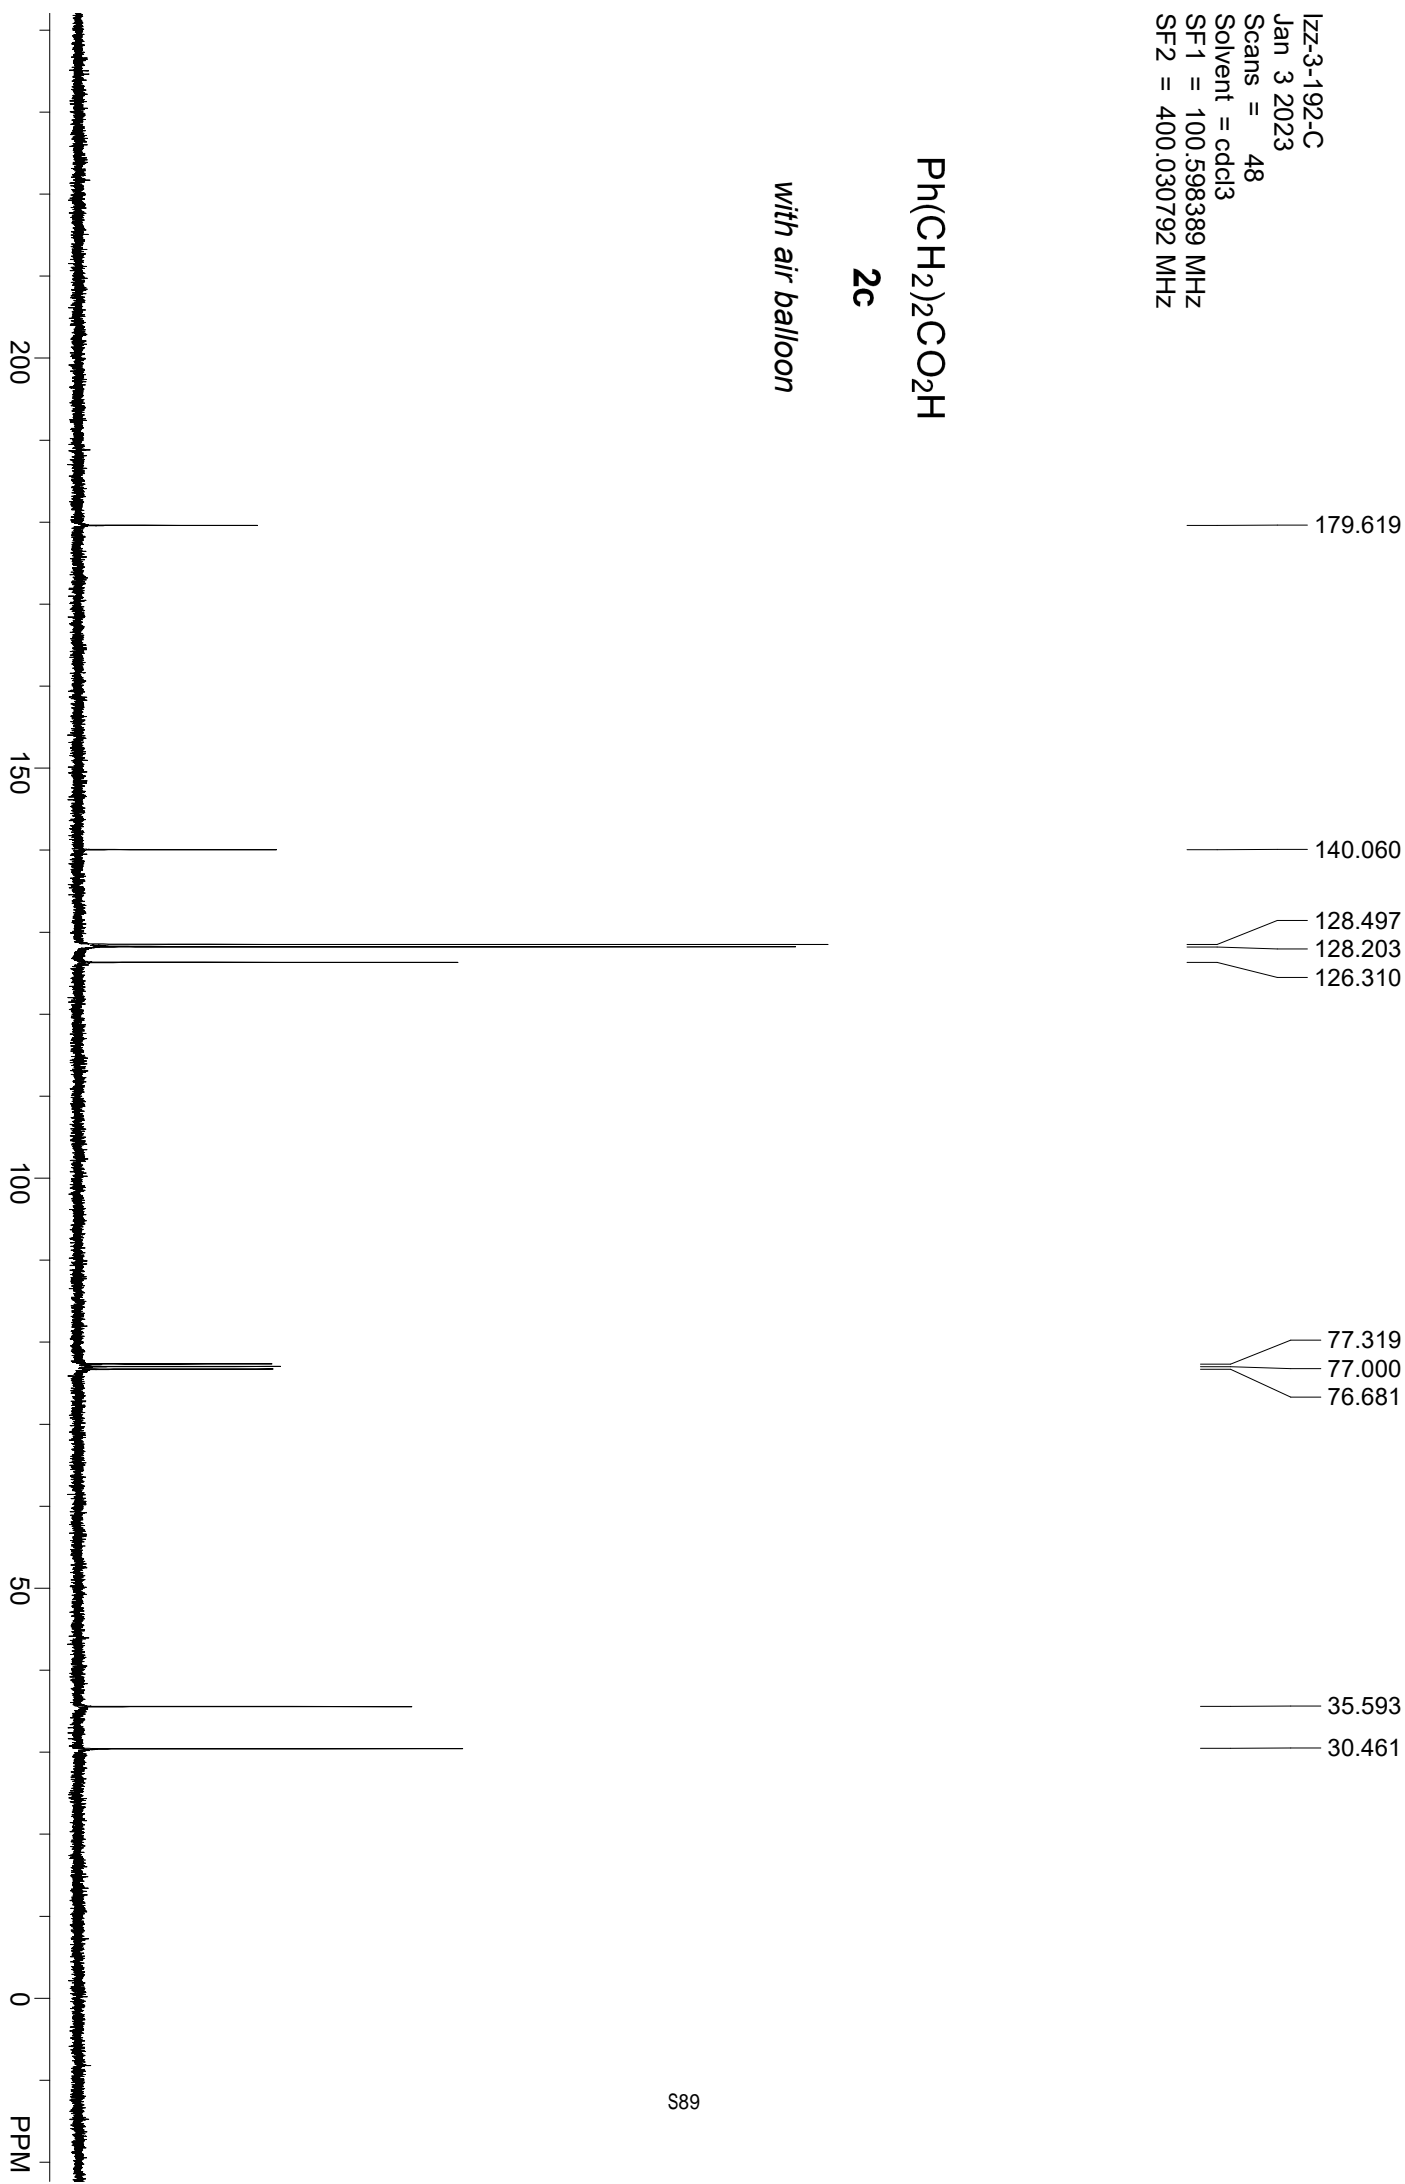

lzz-5-181-H  
Oct 16 2023  
Scans = 8  
Solvent = CDCl3  
SF1 = 400.031799 MHz  
SF2 = 100.596855 MHz

10.506

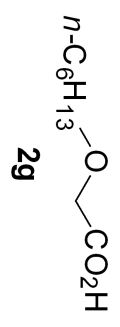

with air balloon

4.129  
3.571  
3.554  
3.537

1.662  
1.646  
1.628  
1.610  
1.593  
1.361  
1.339  
1.304  
0.905  
0.889  
0.872  
-0.000

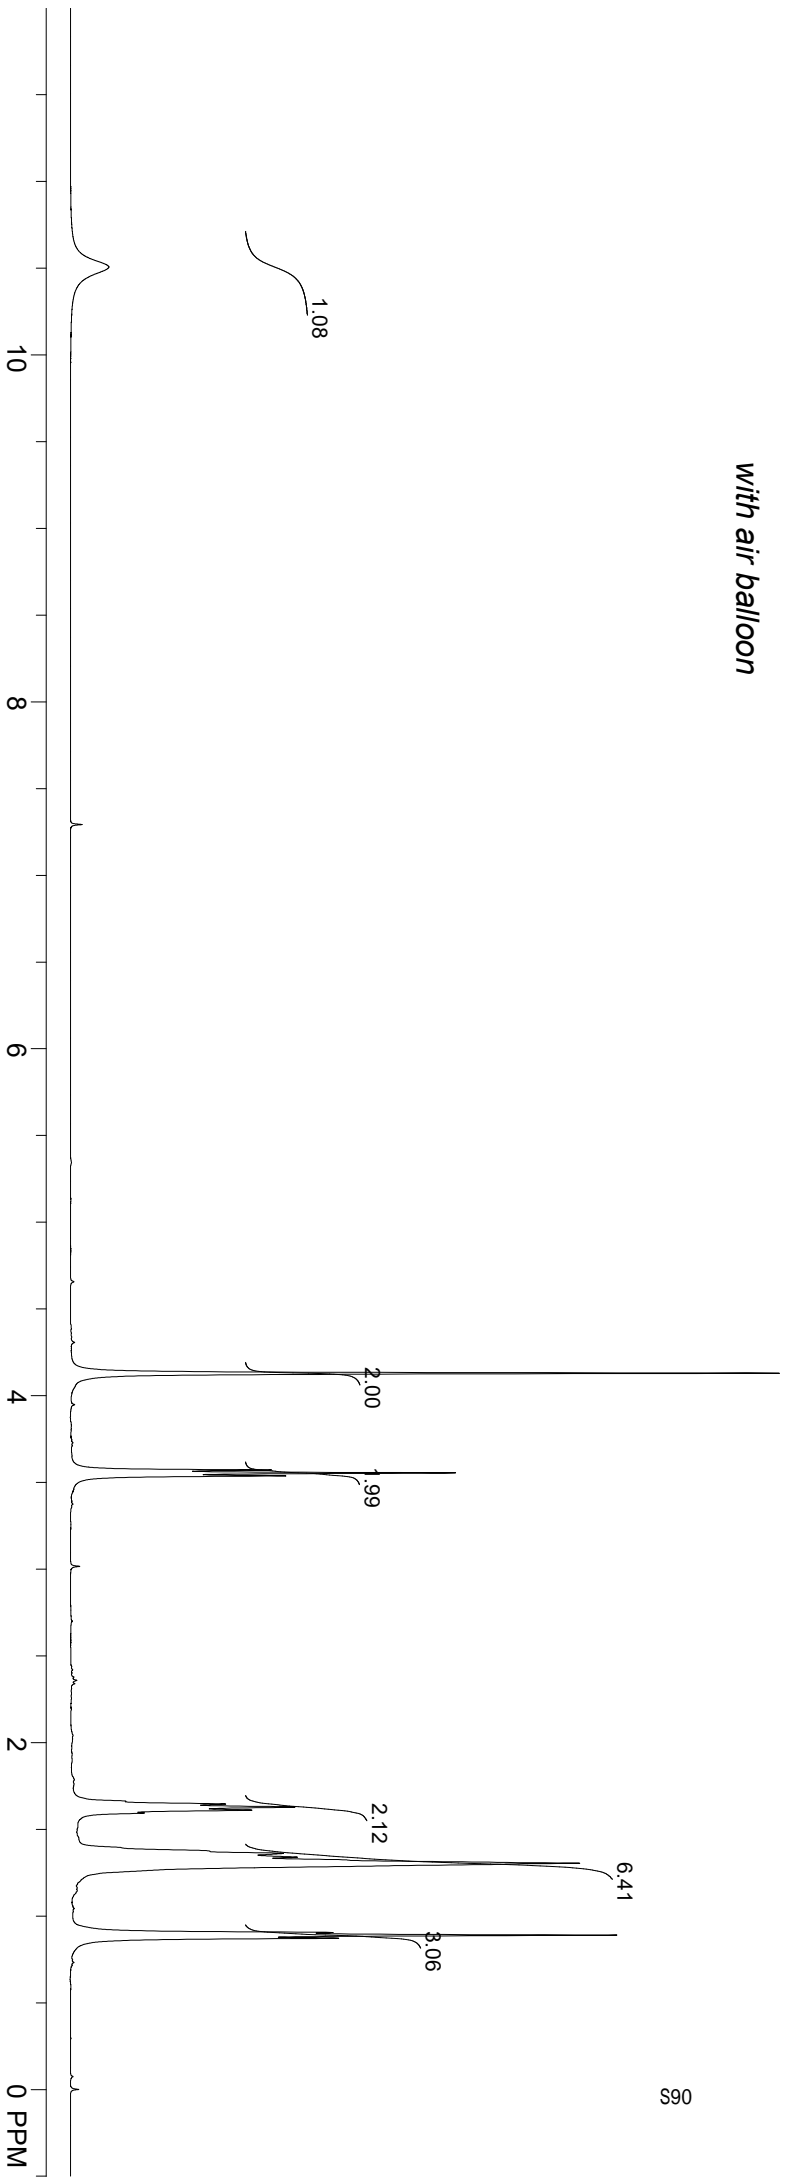

IZZ-5-181-C  
Oct 15 2023  
Scans = 48  
Solvent = cdcl3  
SF1 = 100.519485 MHz  
SF2 = 399.717072 MHz

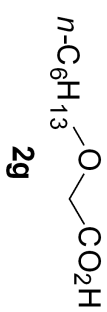

*with air balloon*

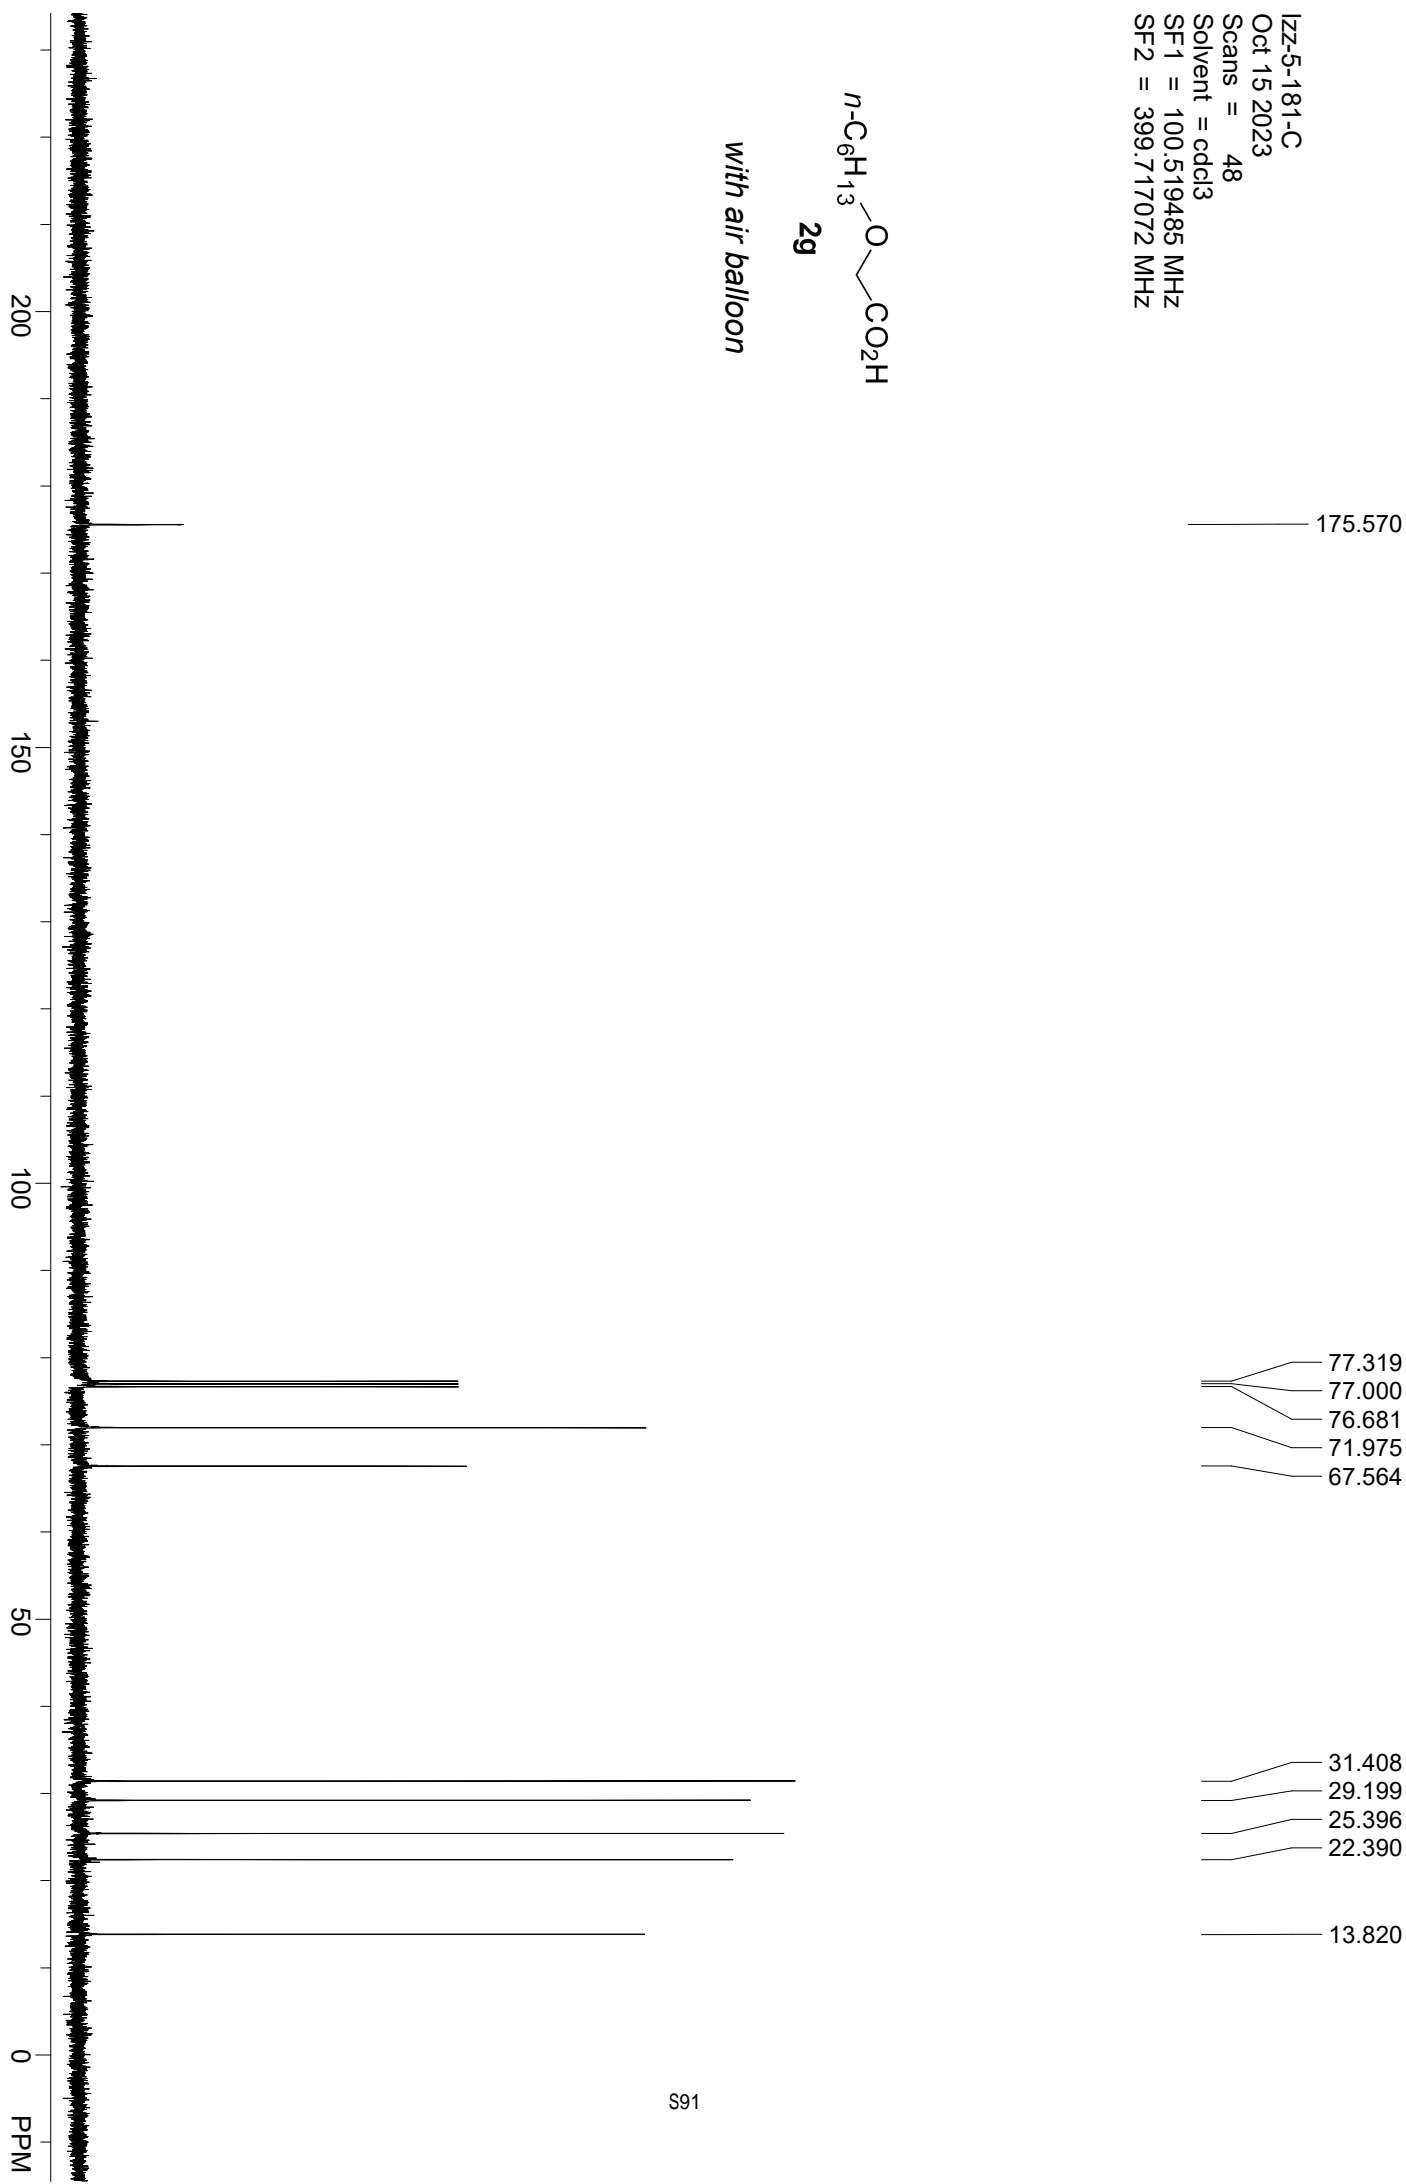

IZZ-5-181-test  
purity = 95%  
14.0 mg of product with  $5.0 \times 10^{-6}$  L mesitylene  
Oct 16 2023  
Scans = 4  
Solvent = cdcl3  
SF1 = 400.031403 MHz  
SF2 = 100.596855 MHz

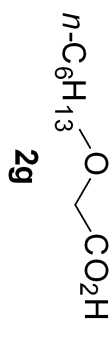

$$\text{purity} = \frac{5.0 \times 0.864}{120.19} \times \frac{3}{2} \times 1.54 \times 160.21 \div 14.0 \approx 95\%$$

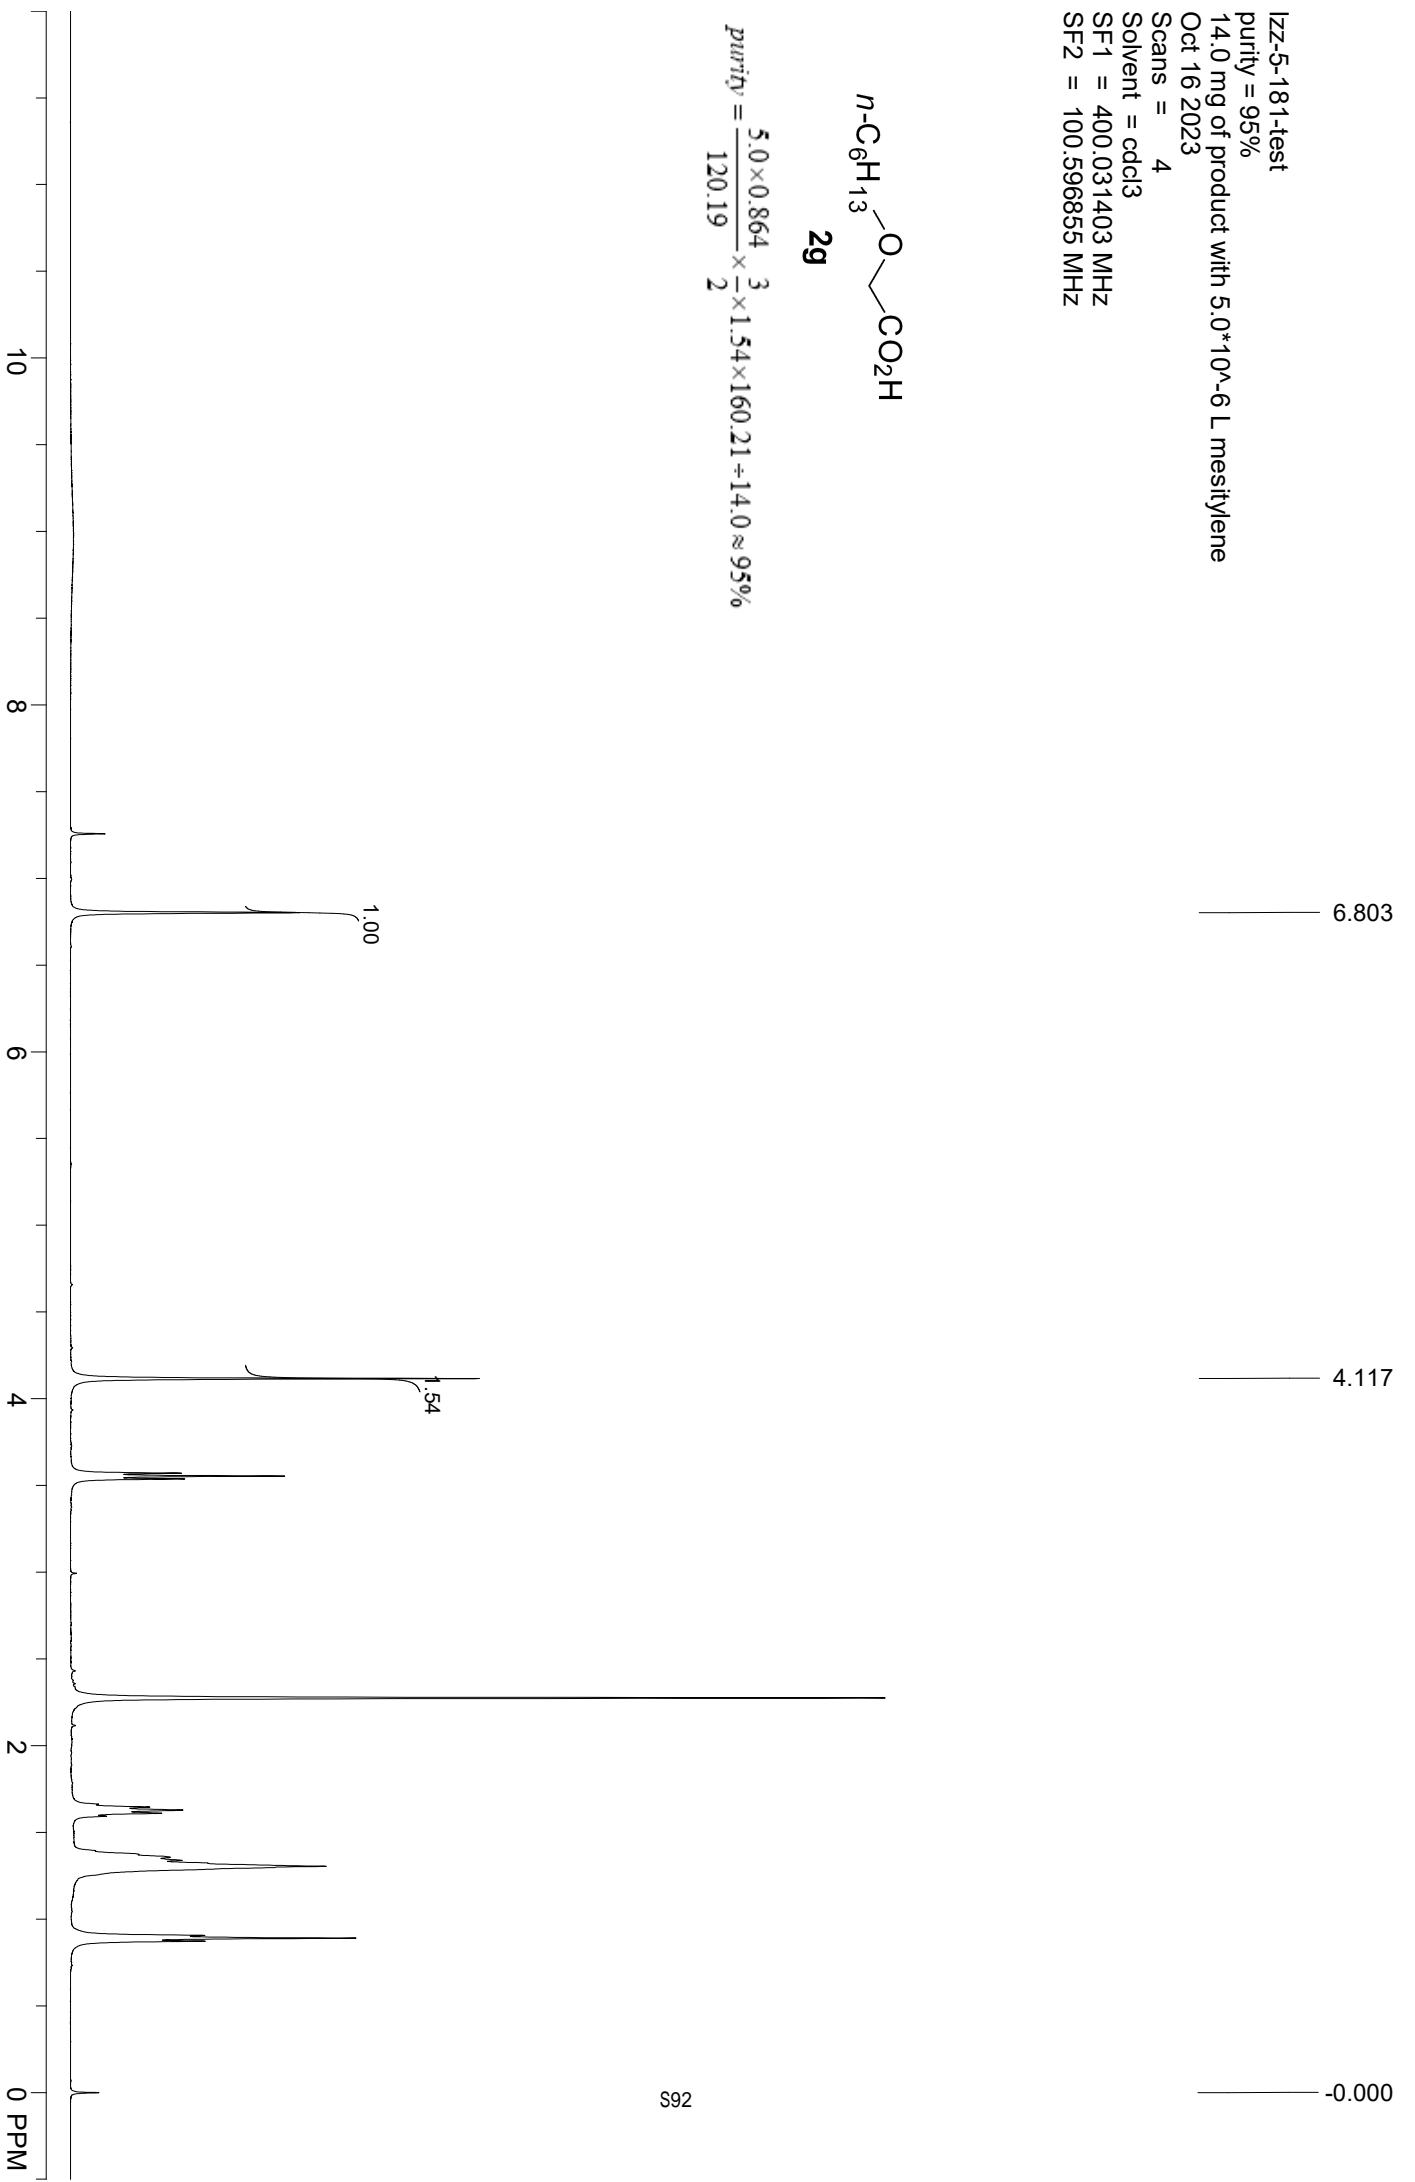

11.452

0.261  
0.000

Izz-4-010-H  
Feb 9 2023  
Scans = 4  
Solvent = CDCl3  
SF1 = 400.031616 MHz  
SF2 = 100.596855 MHz

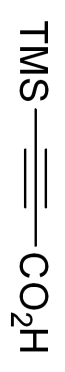

2j

with air balloon

S93

1.01

9.00

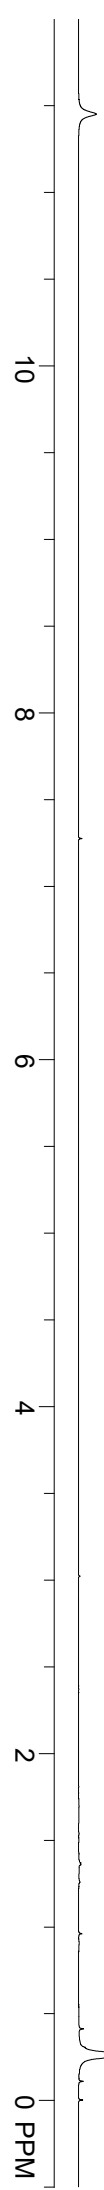

IZZ-4-010-C  
Feb 9 2023  
Scans = 92  
Solvent = cdcl3  
SF1 = 100.598389 MHz  
SF2 = 400.030792 MHz

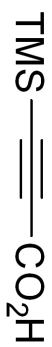

2j

with air balloon

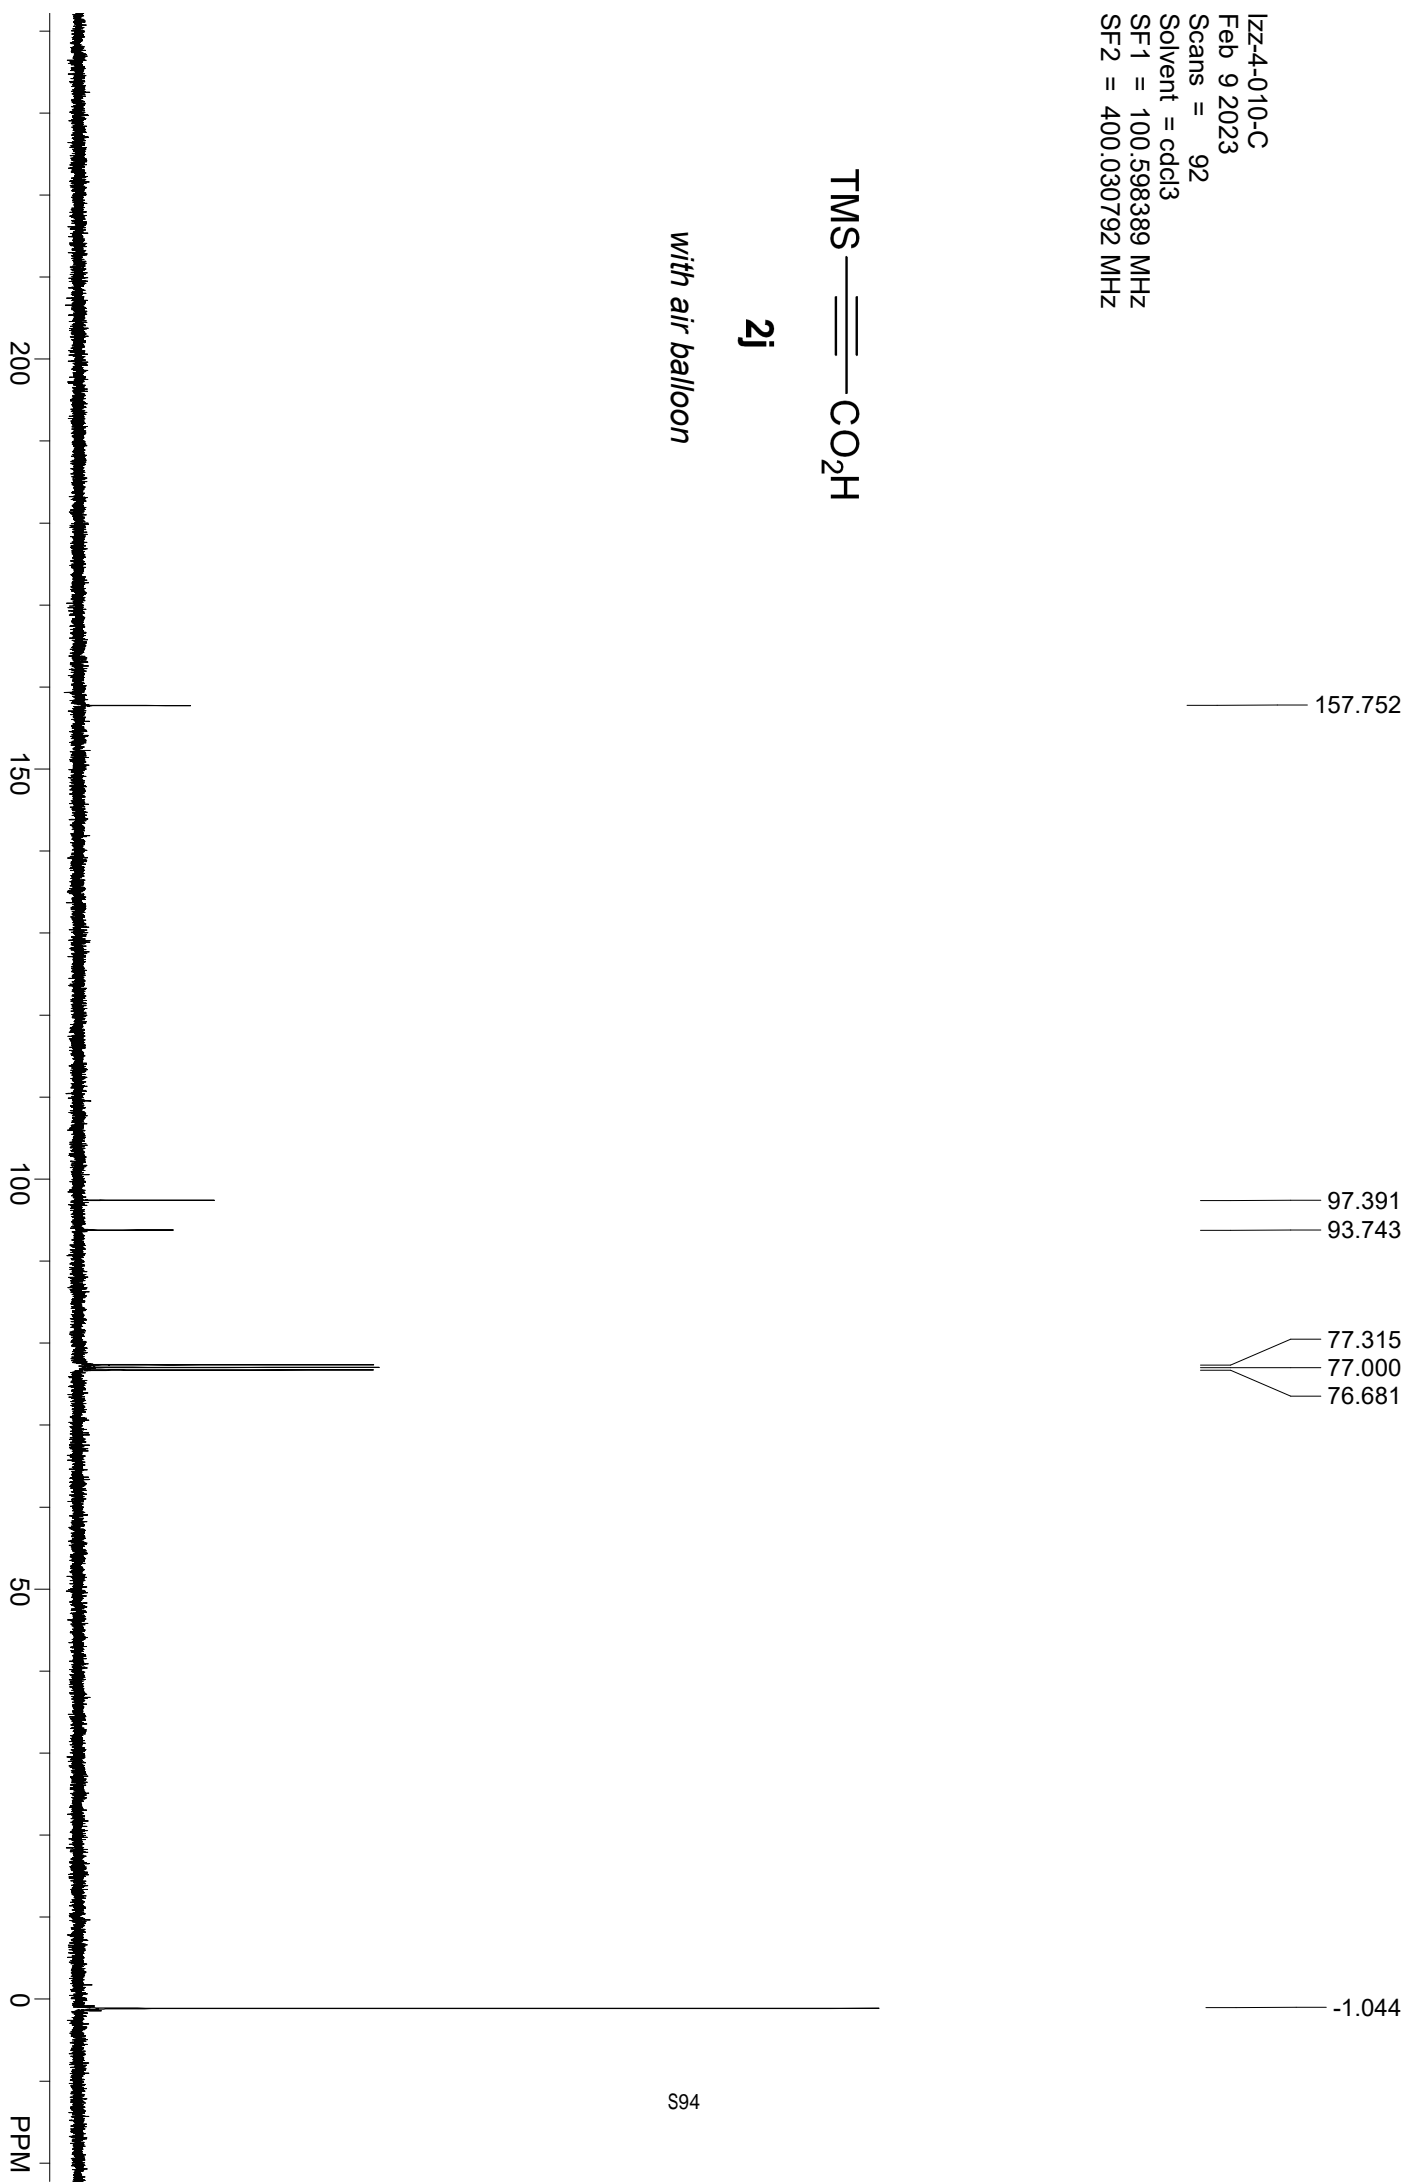

IZZ-4-027-H  
Feb 22 2023  
Scans = 8  
Solvent = CDCl<sub>3</sub>  
SF1 = 399.717651 MHz  
SF2 = 100.517960 MHz

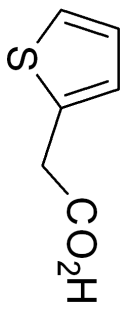

**2k**

*with air balloon*

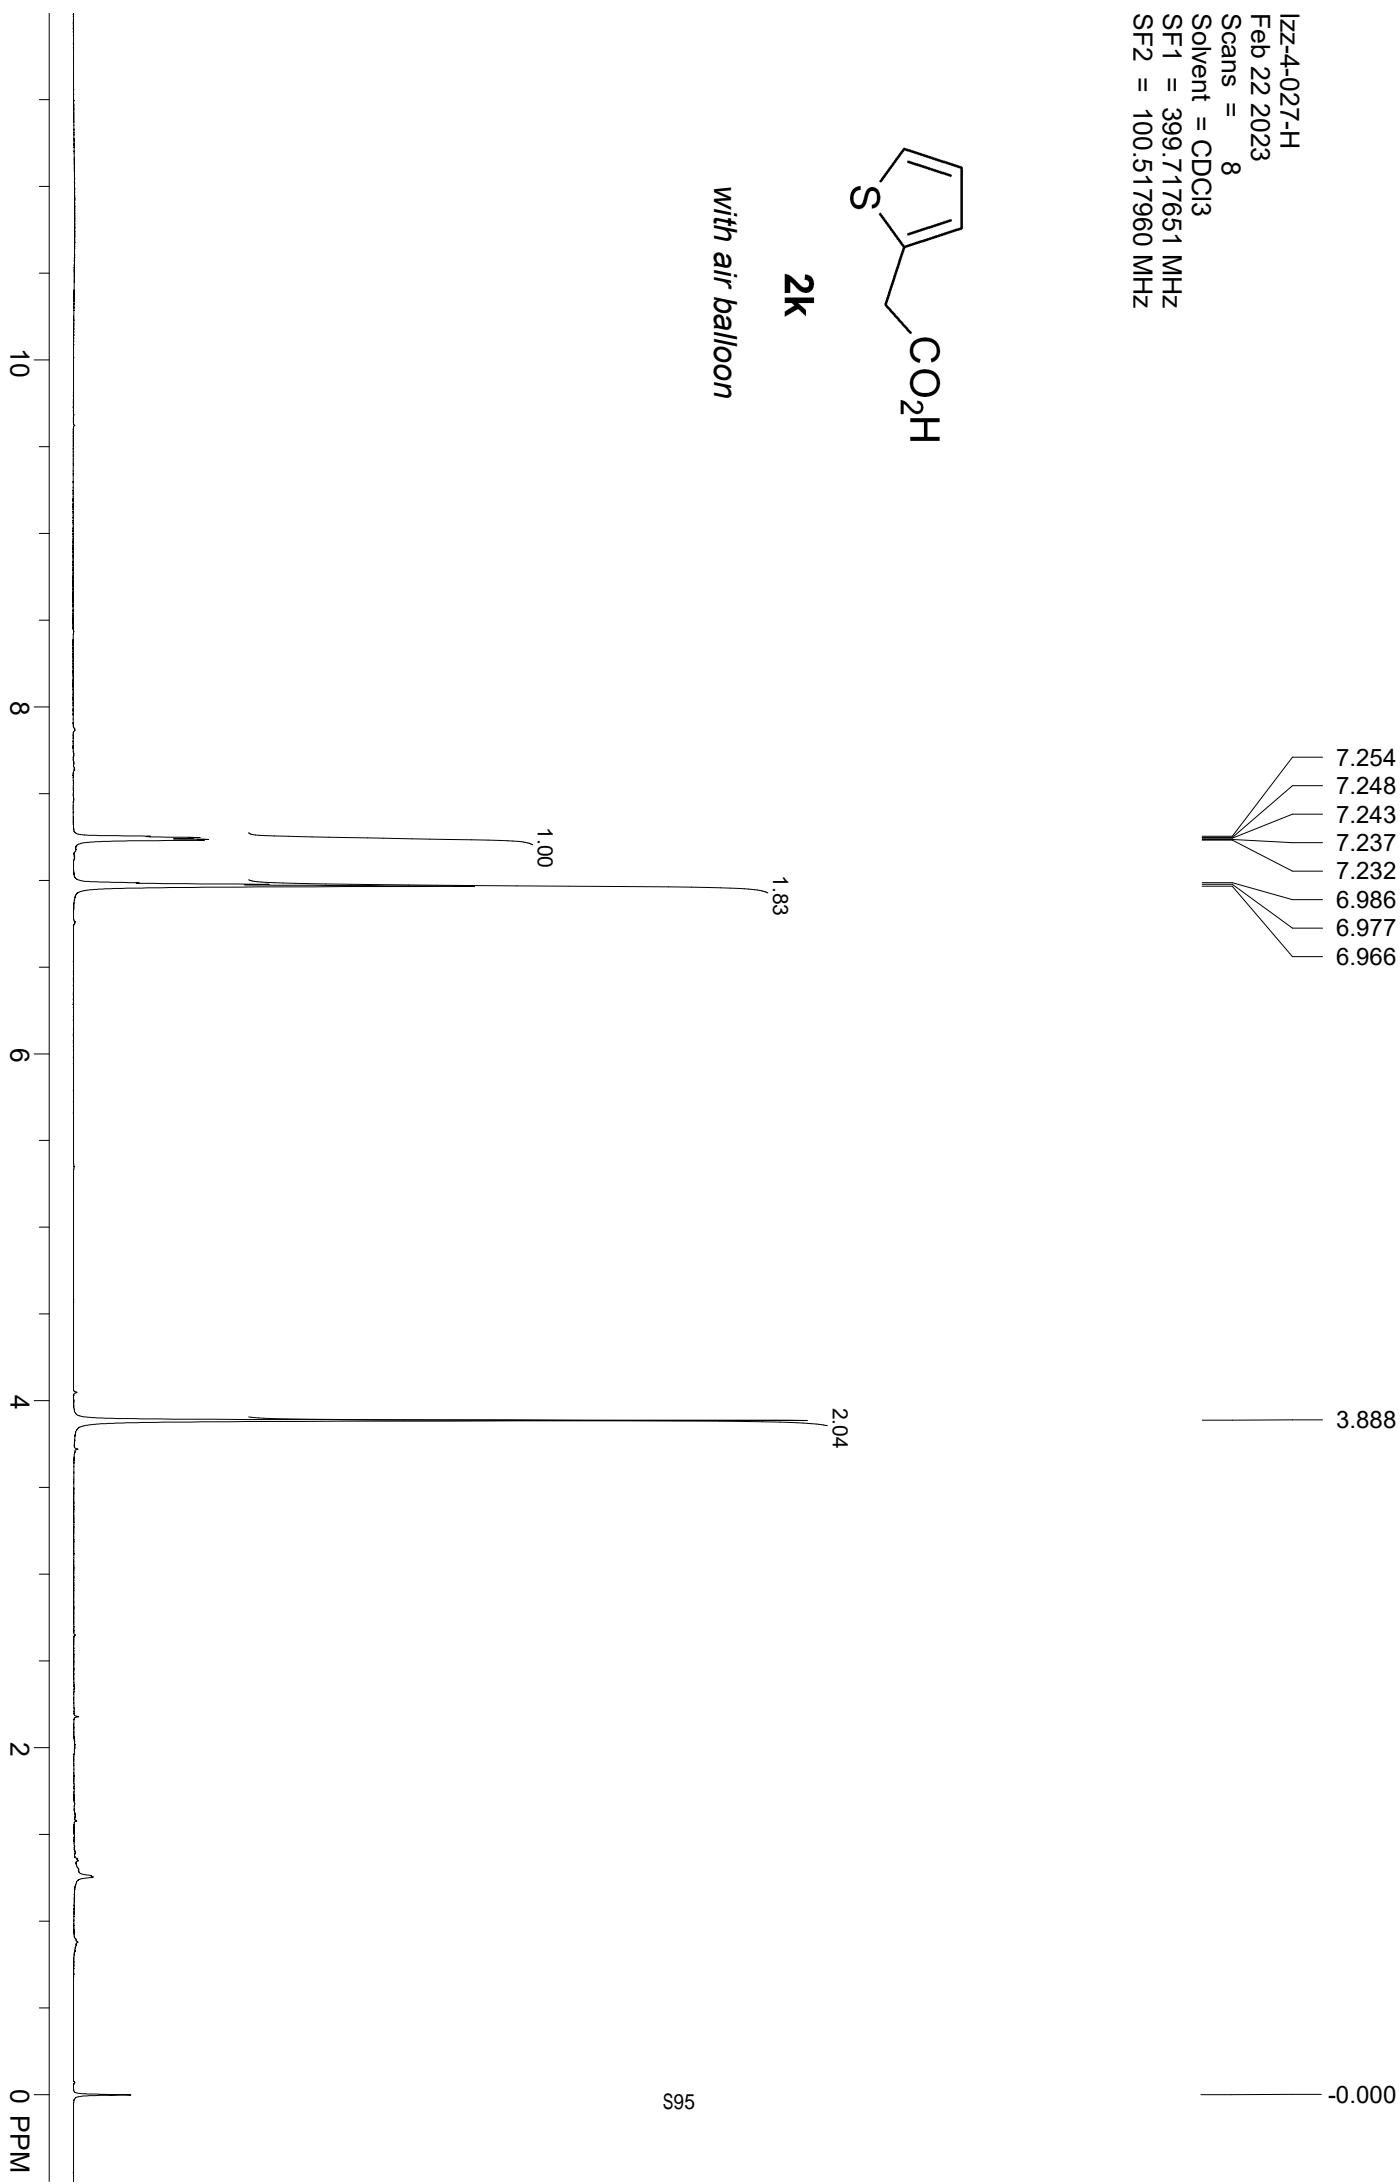

IZZ-4-027-C  
Feb 21 2023  
Scans = 44  
Solvent = cdcl3  
SF1 = 100.519485 MHz  
SF2 = 399.717072 MHz

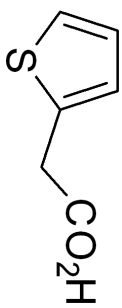

**2k**

with air balloon

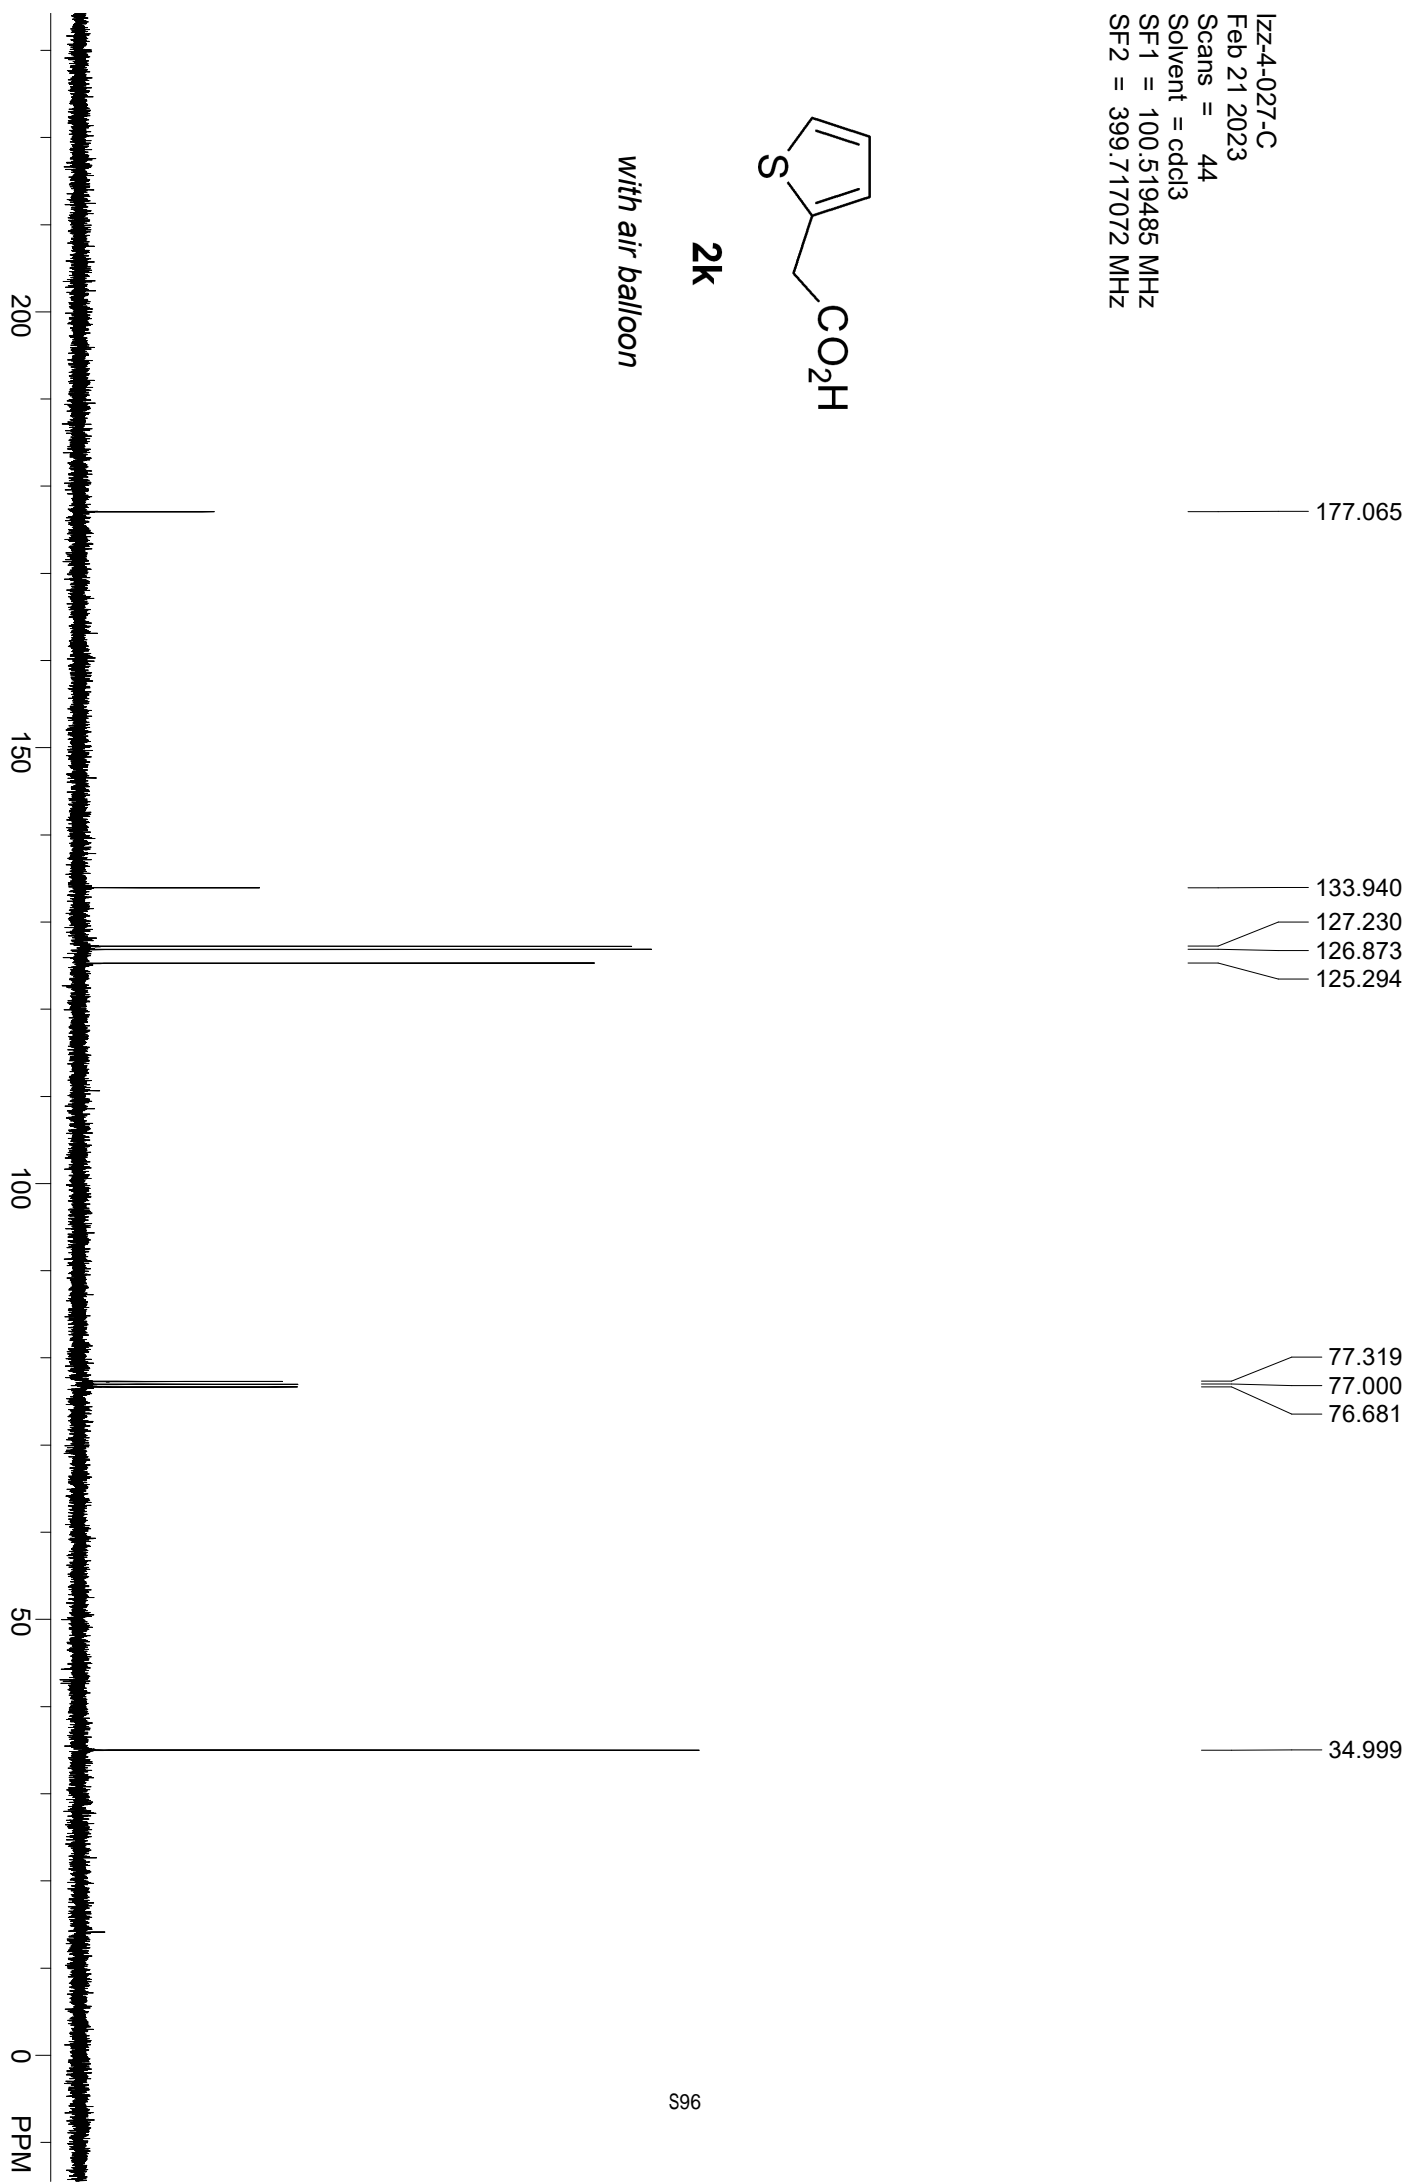



IZZ-4-002-H-2  
Jan 7 2024  
Scans = 4  
Solvent = cdcl3  
SF1 = 399.717651 MHz  
SF2 = 100.517960 MHz

TBDPSO(CH<sub>2</sub>)<sub>5</sub>CO<sub>2</sub>H

**4ae**

with air balloon

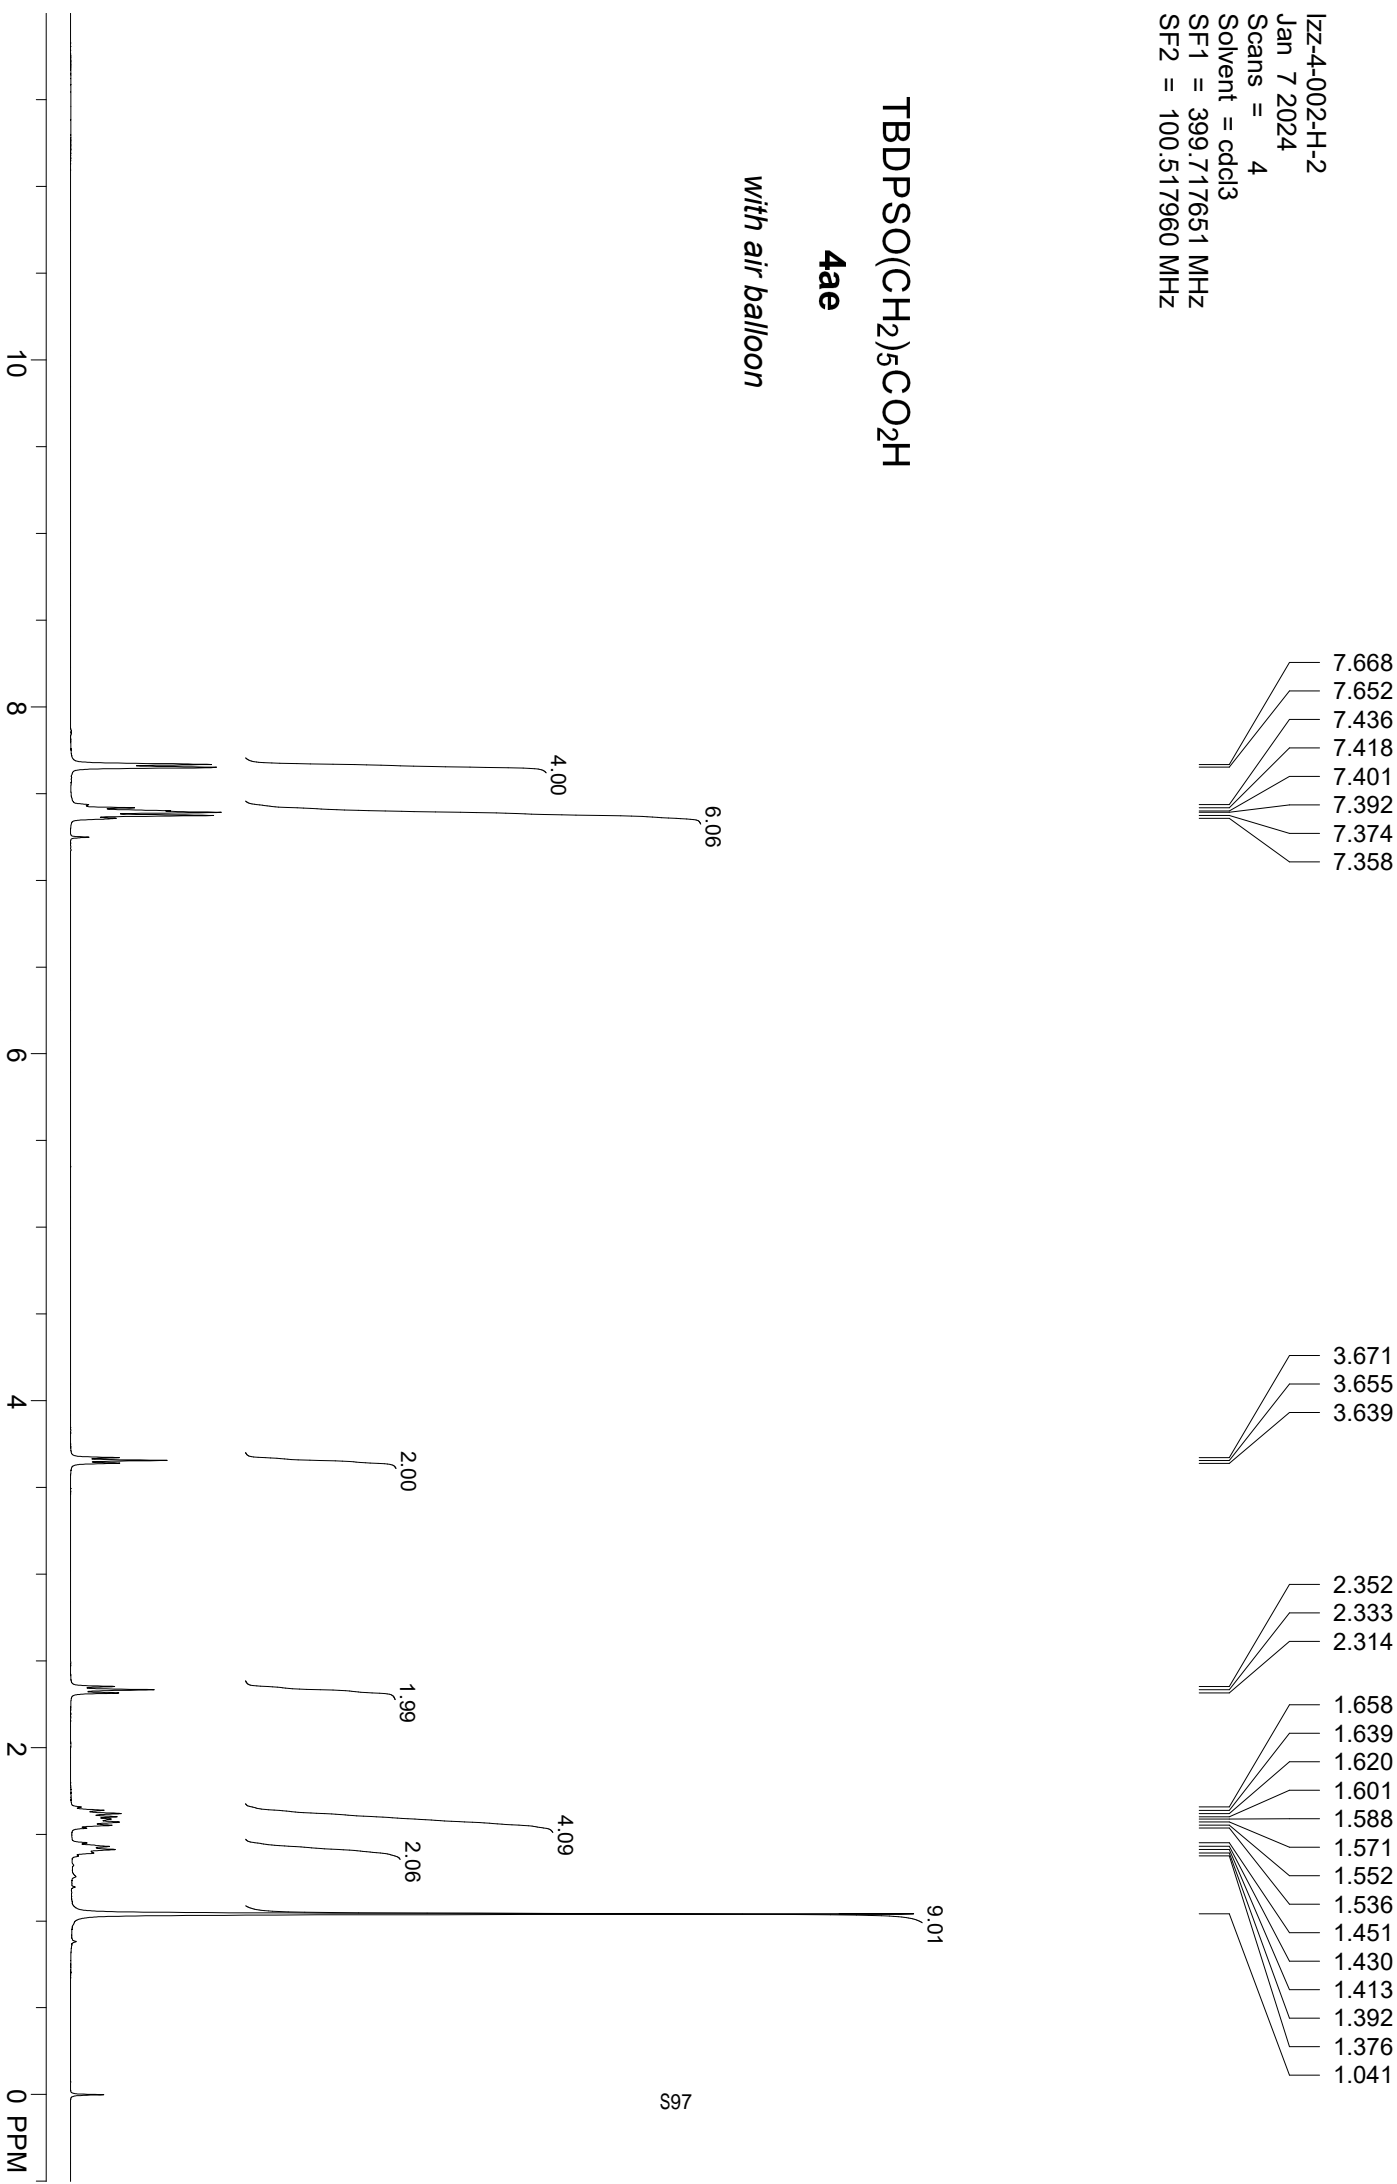

lzz-4-002-C  
Jan 9 2023  
Scans = 148  
Solvent = cdcl3  
SF1 = 100.598389 MHz  
SF2 = 400.030792 MHz

TBDPSO(CH<sub>2</sub>)<sub>5</sub>CO<sub>2</sub>H

**4ae**

*with air balloon*

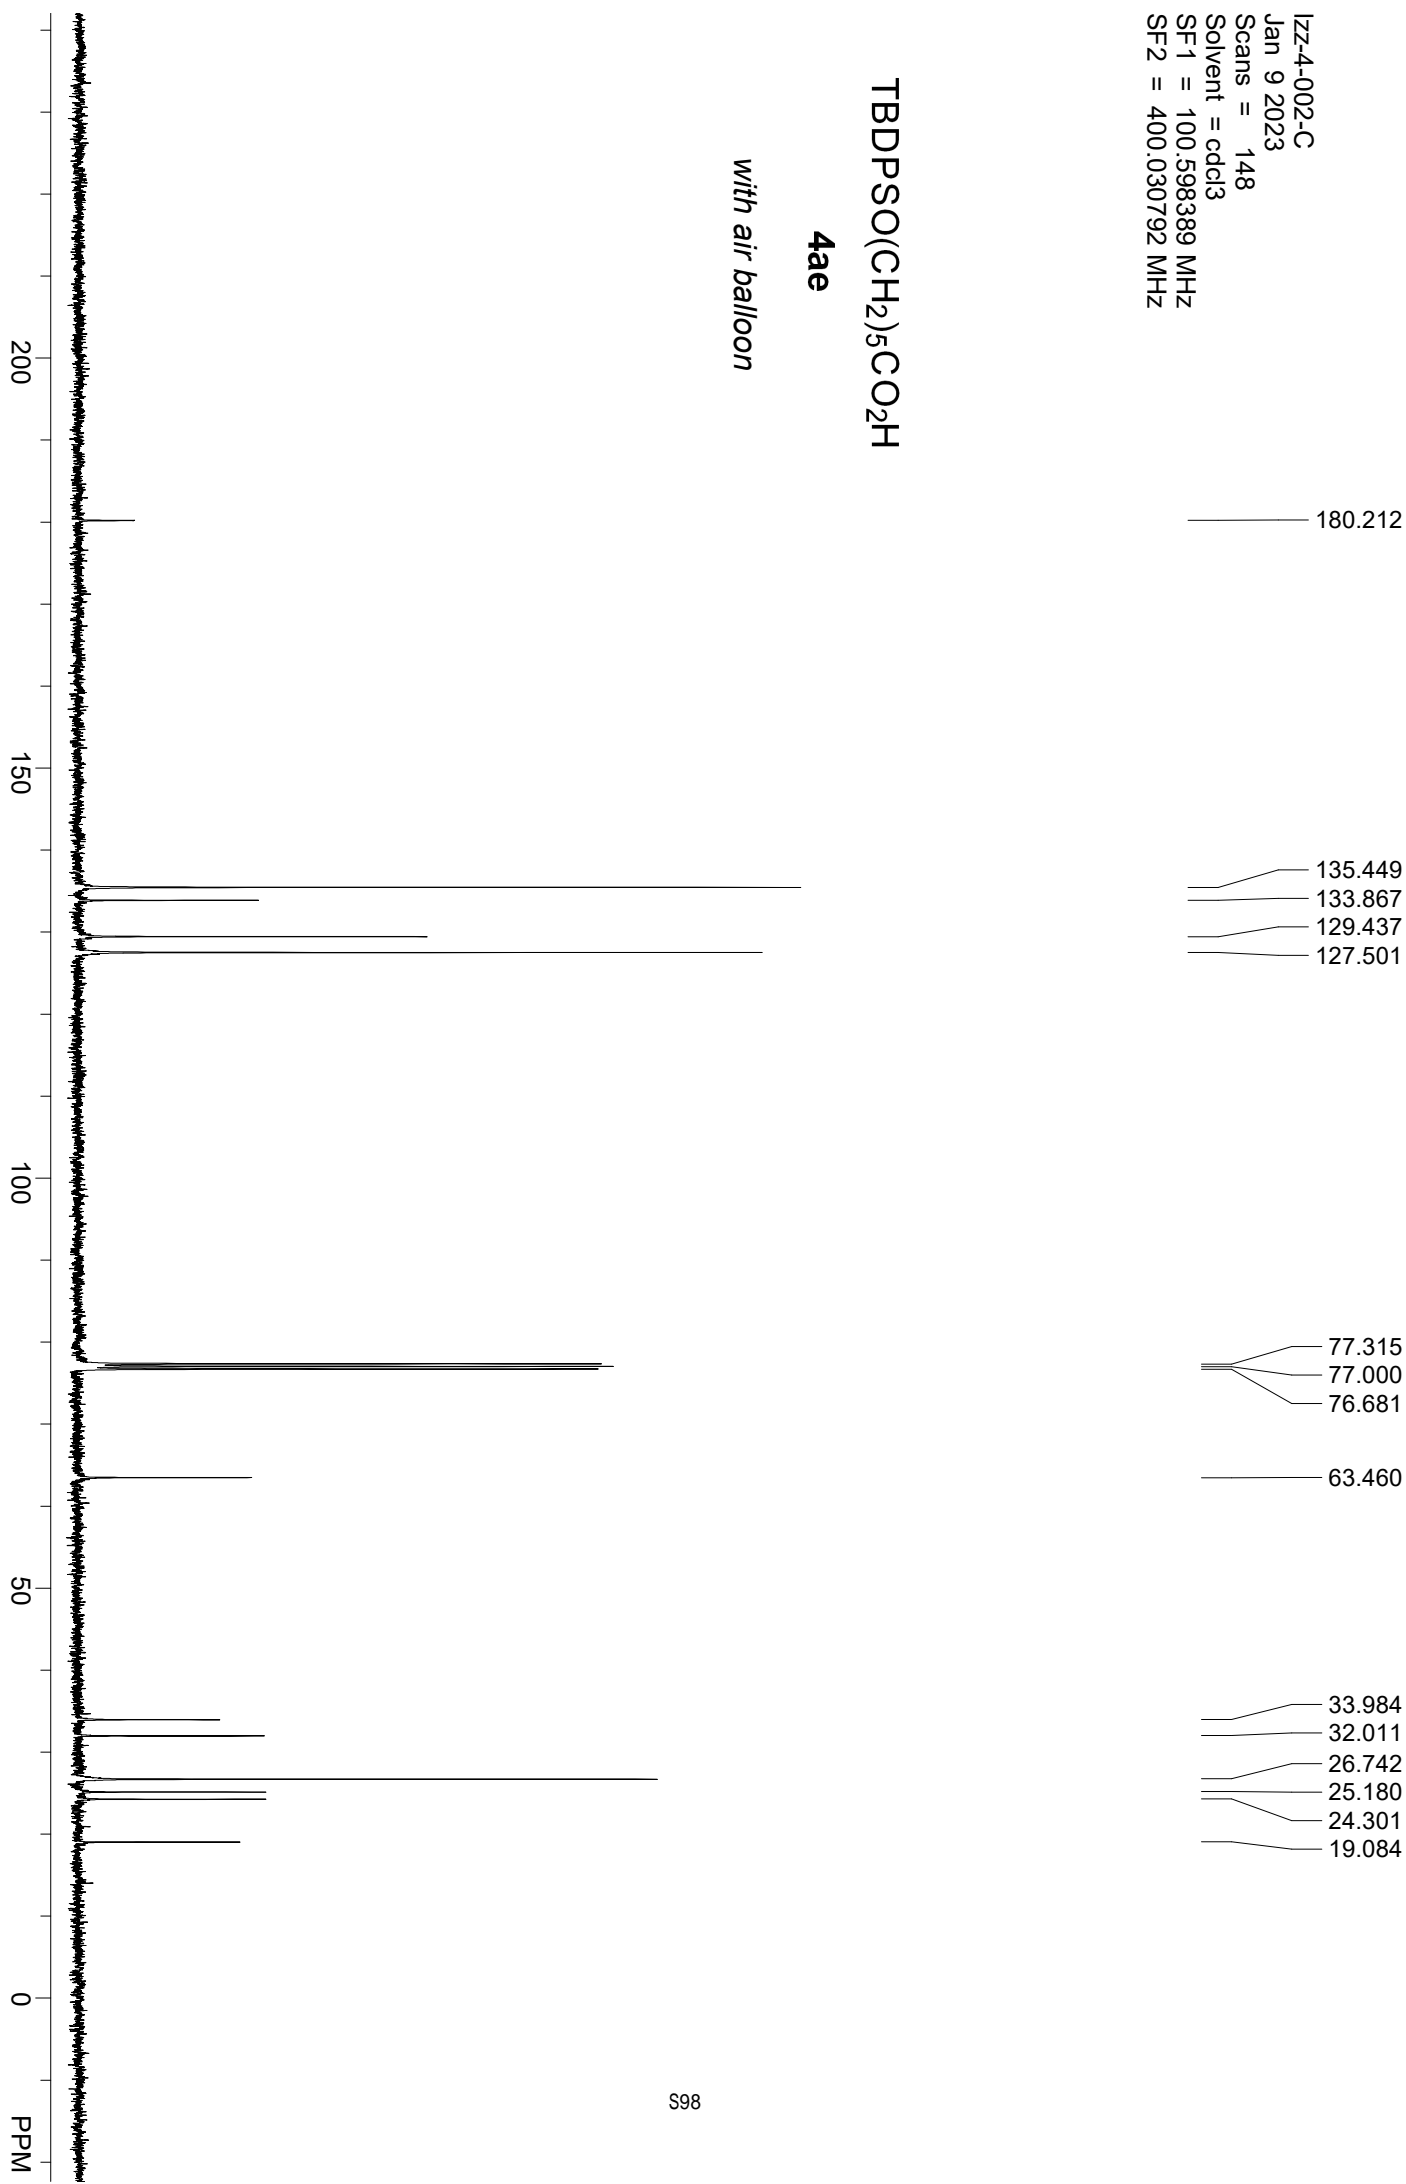

Izz-1-75-H  
2020-07-26 13:18:31.046  
Scans = 8  
Solvent = CDCl3  
SF1 = 300.130005 MHz  
SF2 = 1.000000 MHz

7.336  
7.310  
7.282  
7.258  
7.231  
7.176  
7.151  
7.125  
7.068  
7.042

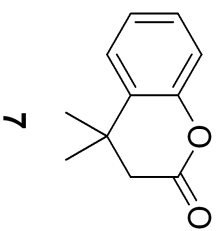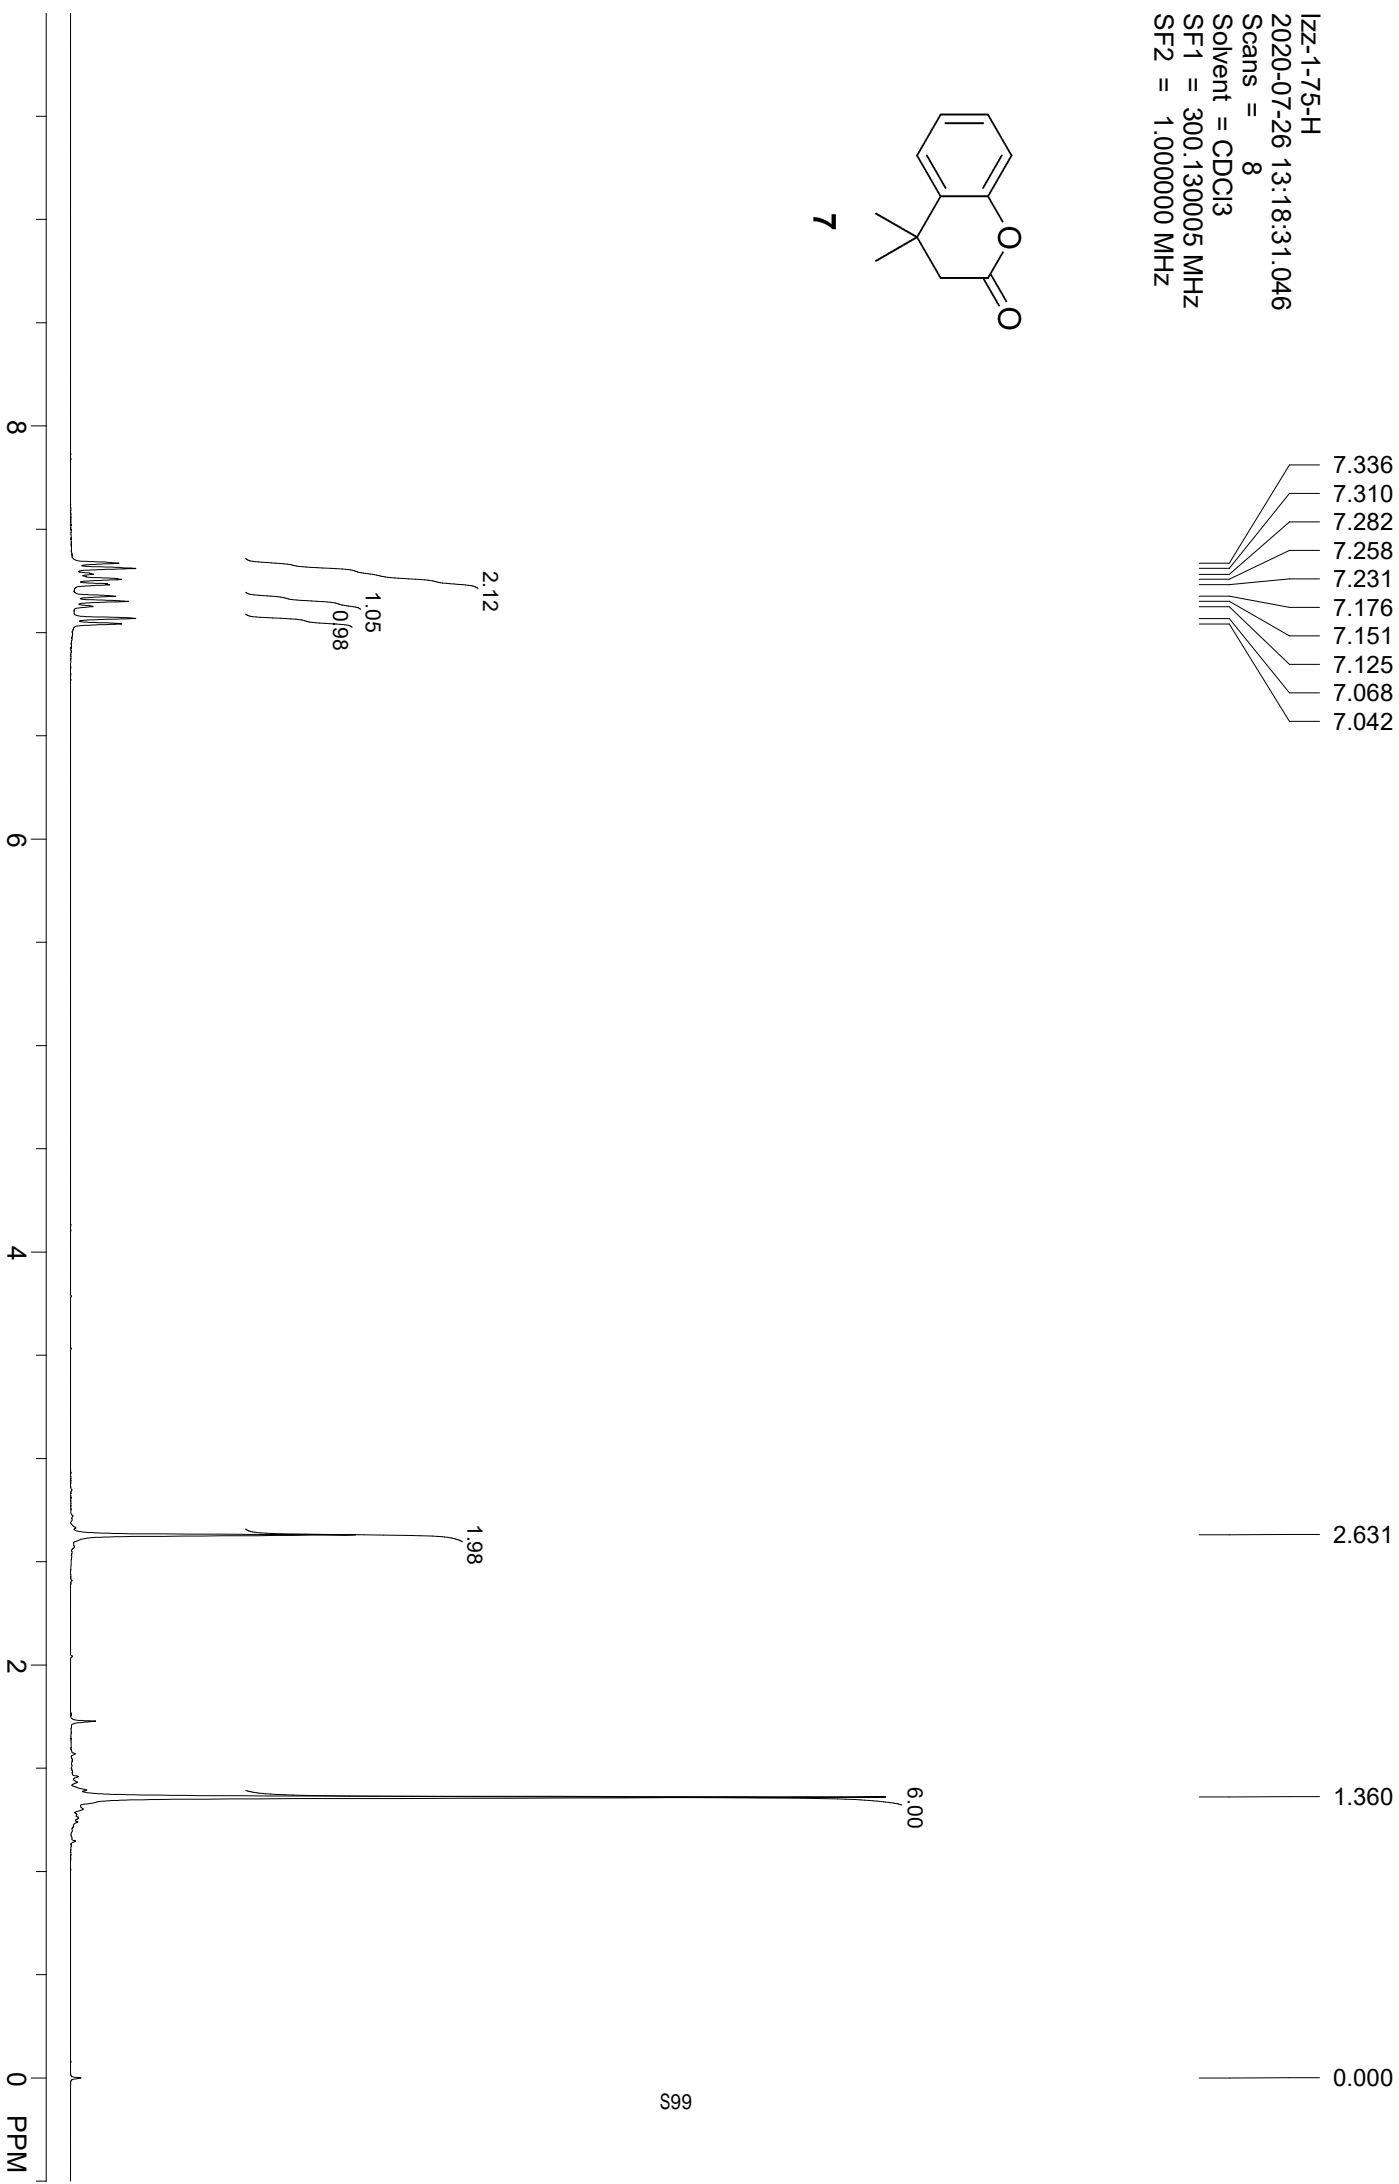

lzz-1-75-C  
2020-07-26 13:24:42.031  
Scans = 81  
Solvent = CDCl3  
SF1 = 75.467751 MHz  
SF2 = 1.000000 MHz

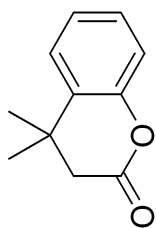

7

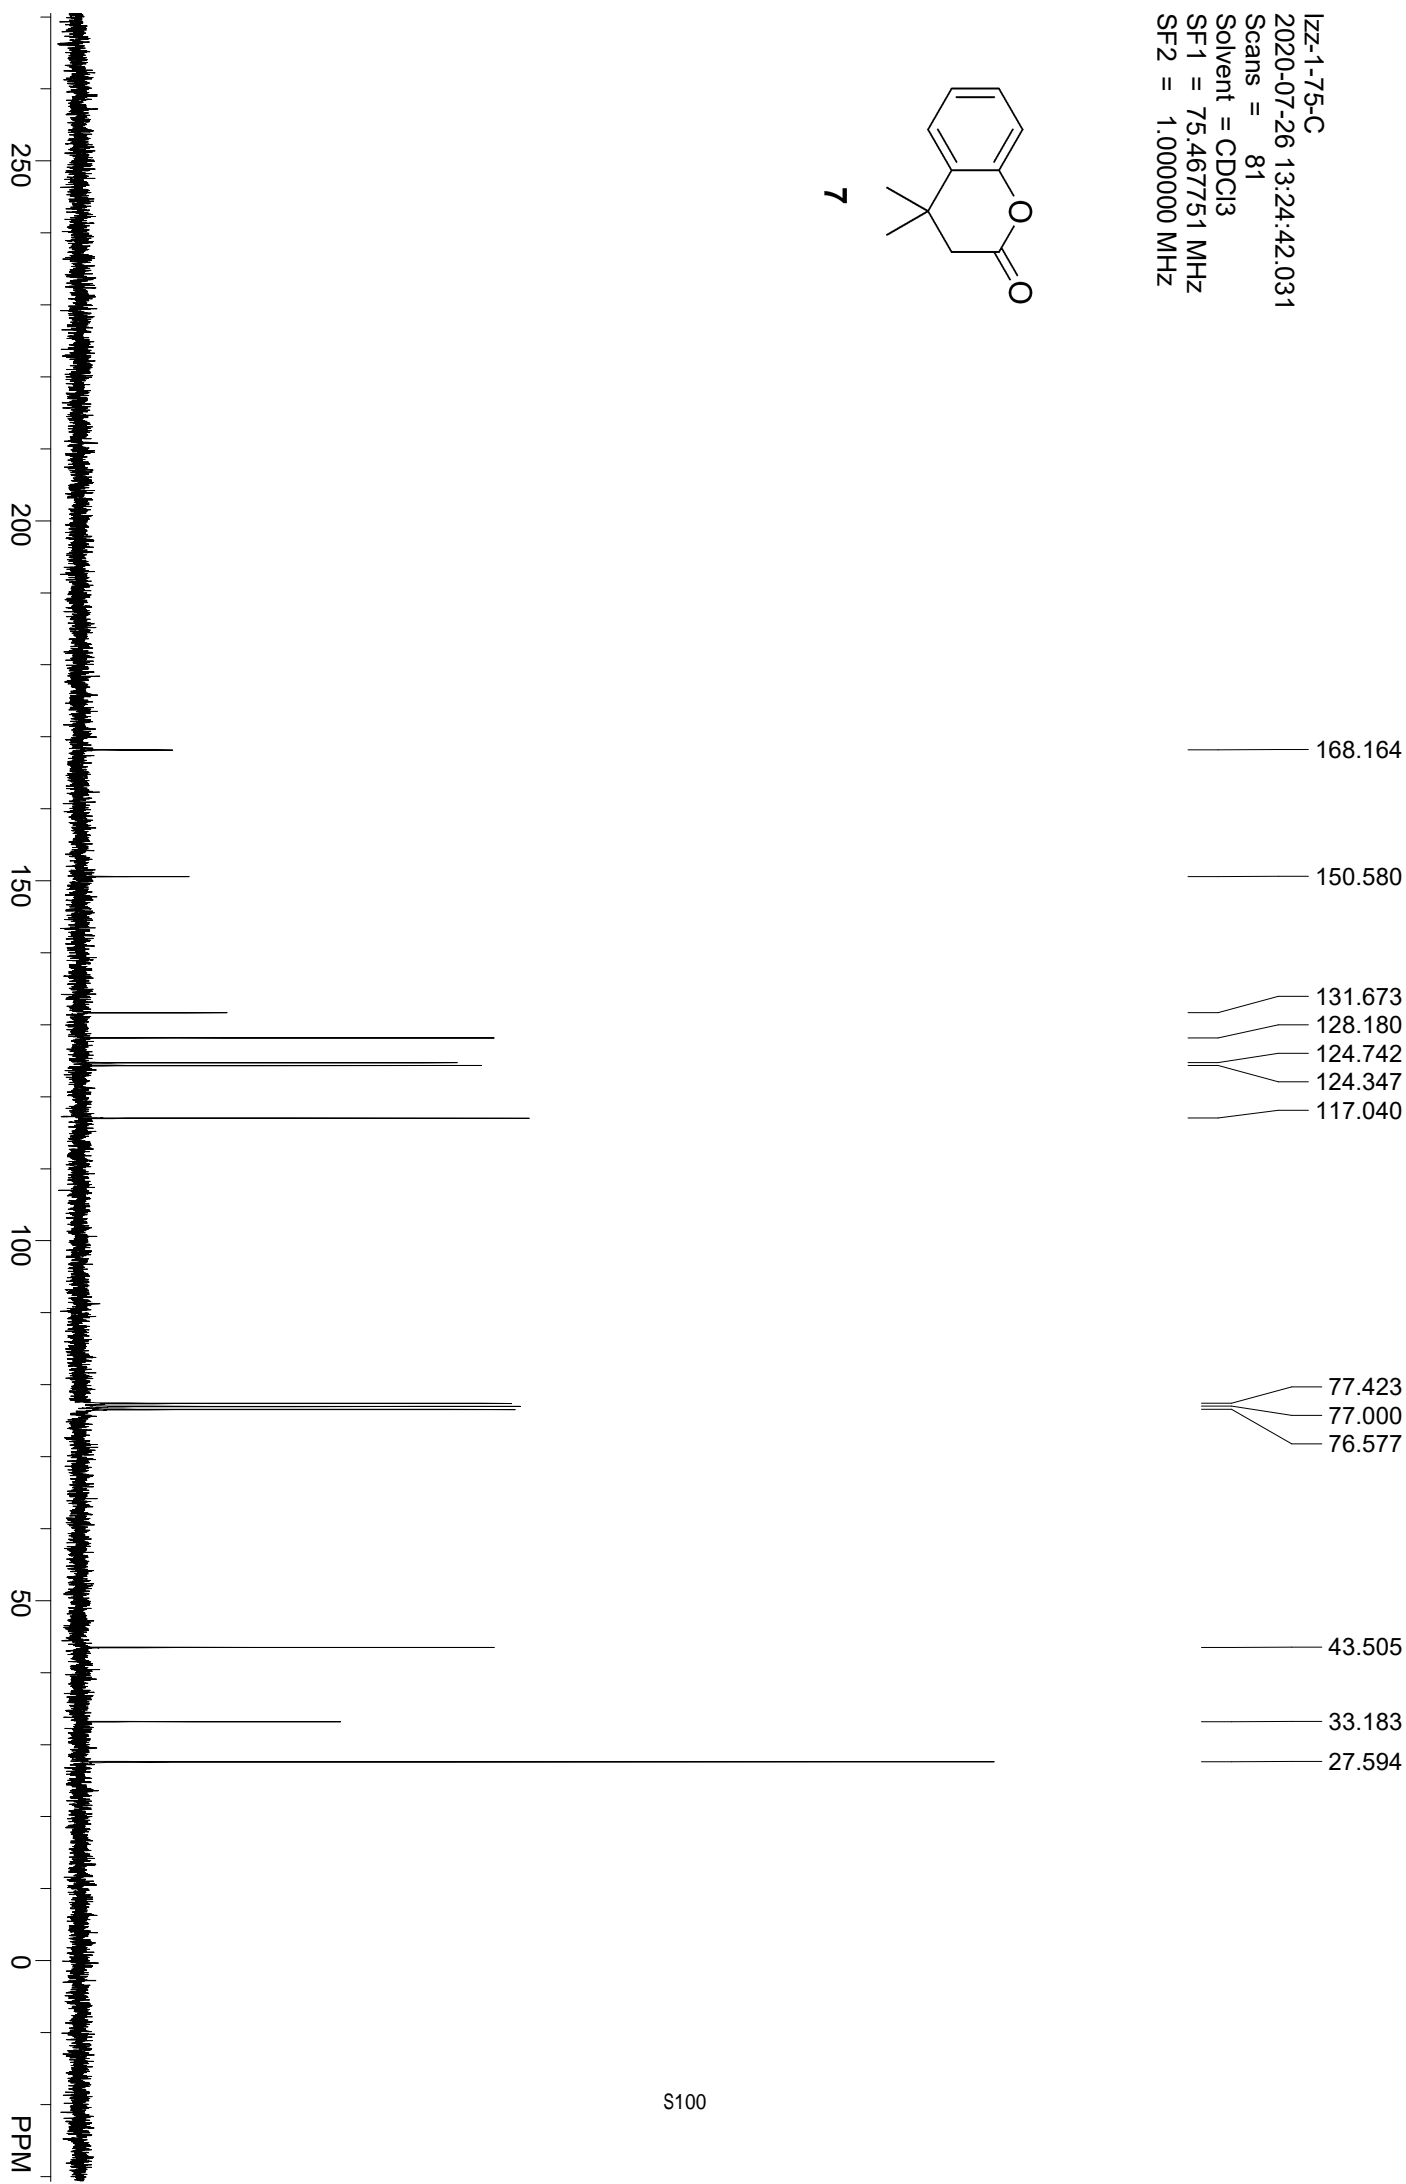

lzz-1-77-H  
2020-07-27 20:13:20.375  
Scans = 8  
Solvent = CDCl3  
SF1 = 300.130005 MHz  
SF2 = 1.000000 MHz

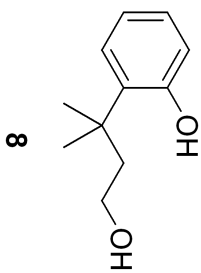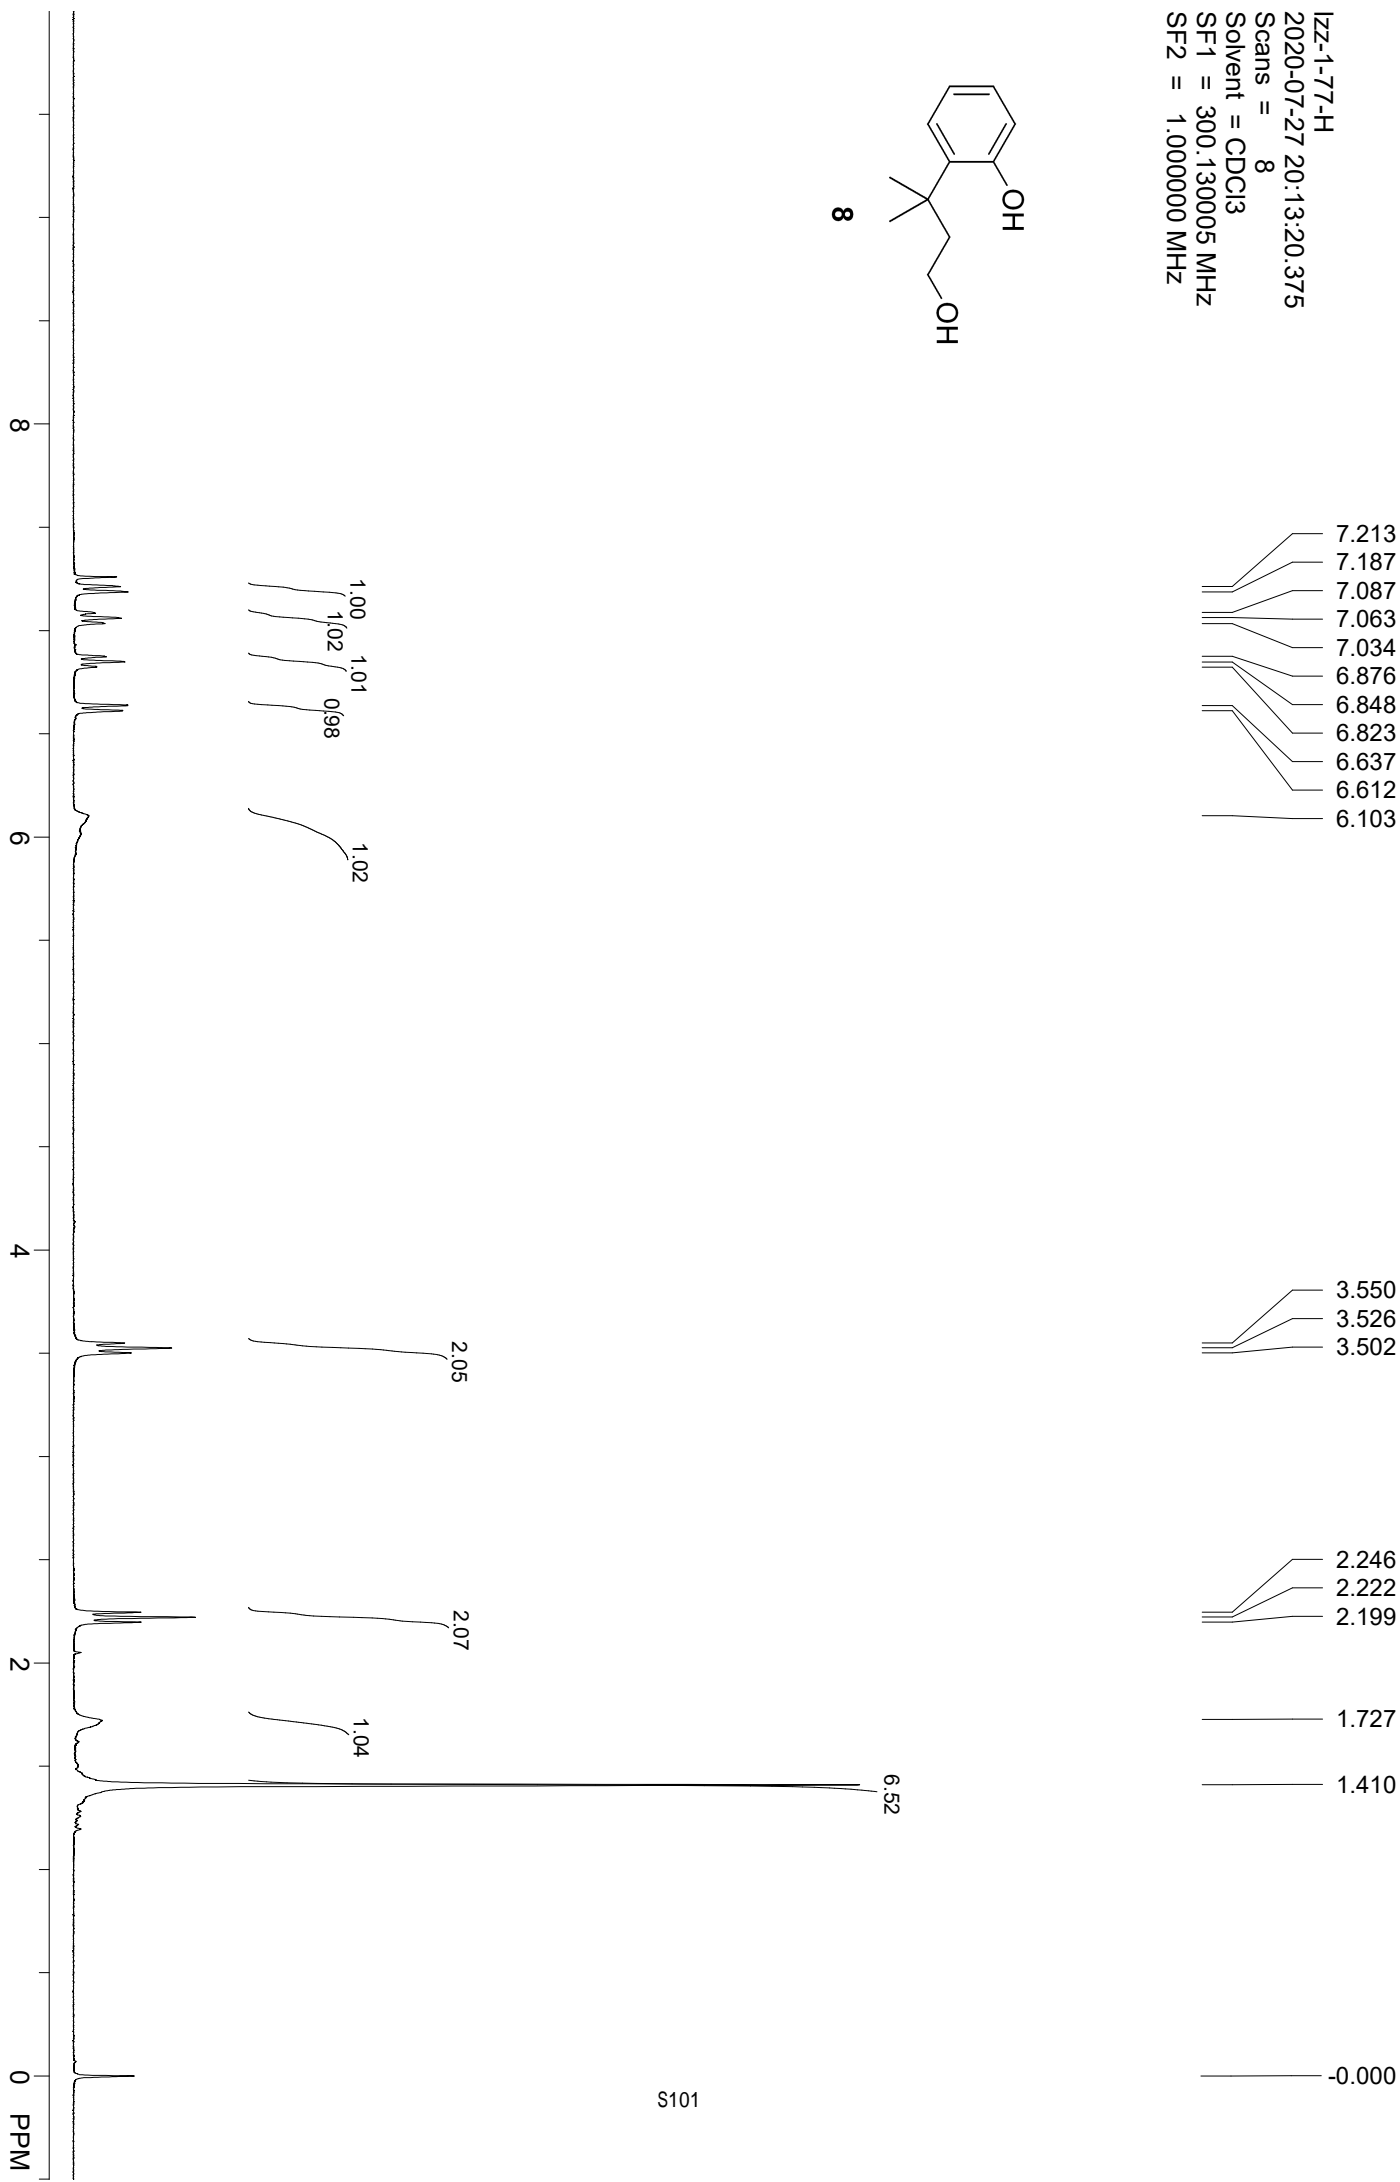

lzz-1-77-C  
2020-07-28 15:59:34.796  
Scans = 65  
Solvent = CDCl3  
SF1 = 75.467751 MHz  
SF2 = 1.000000 MHz

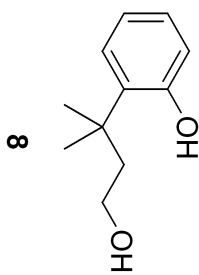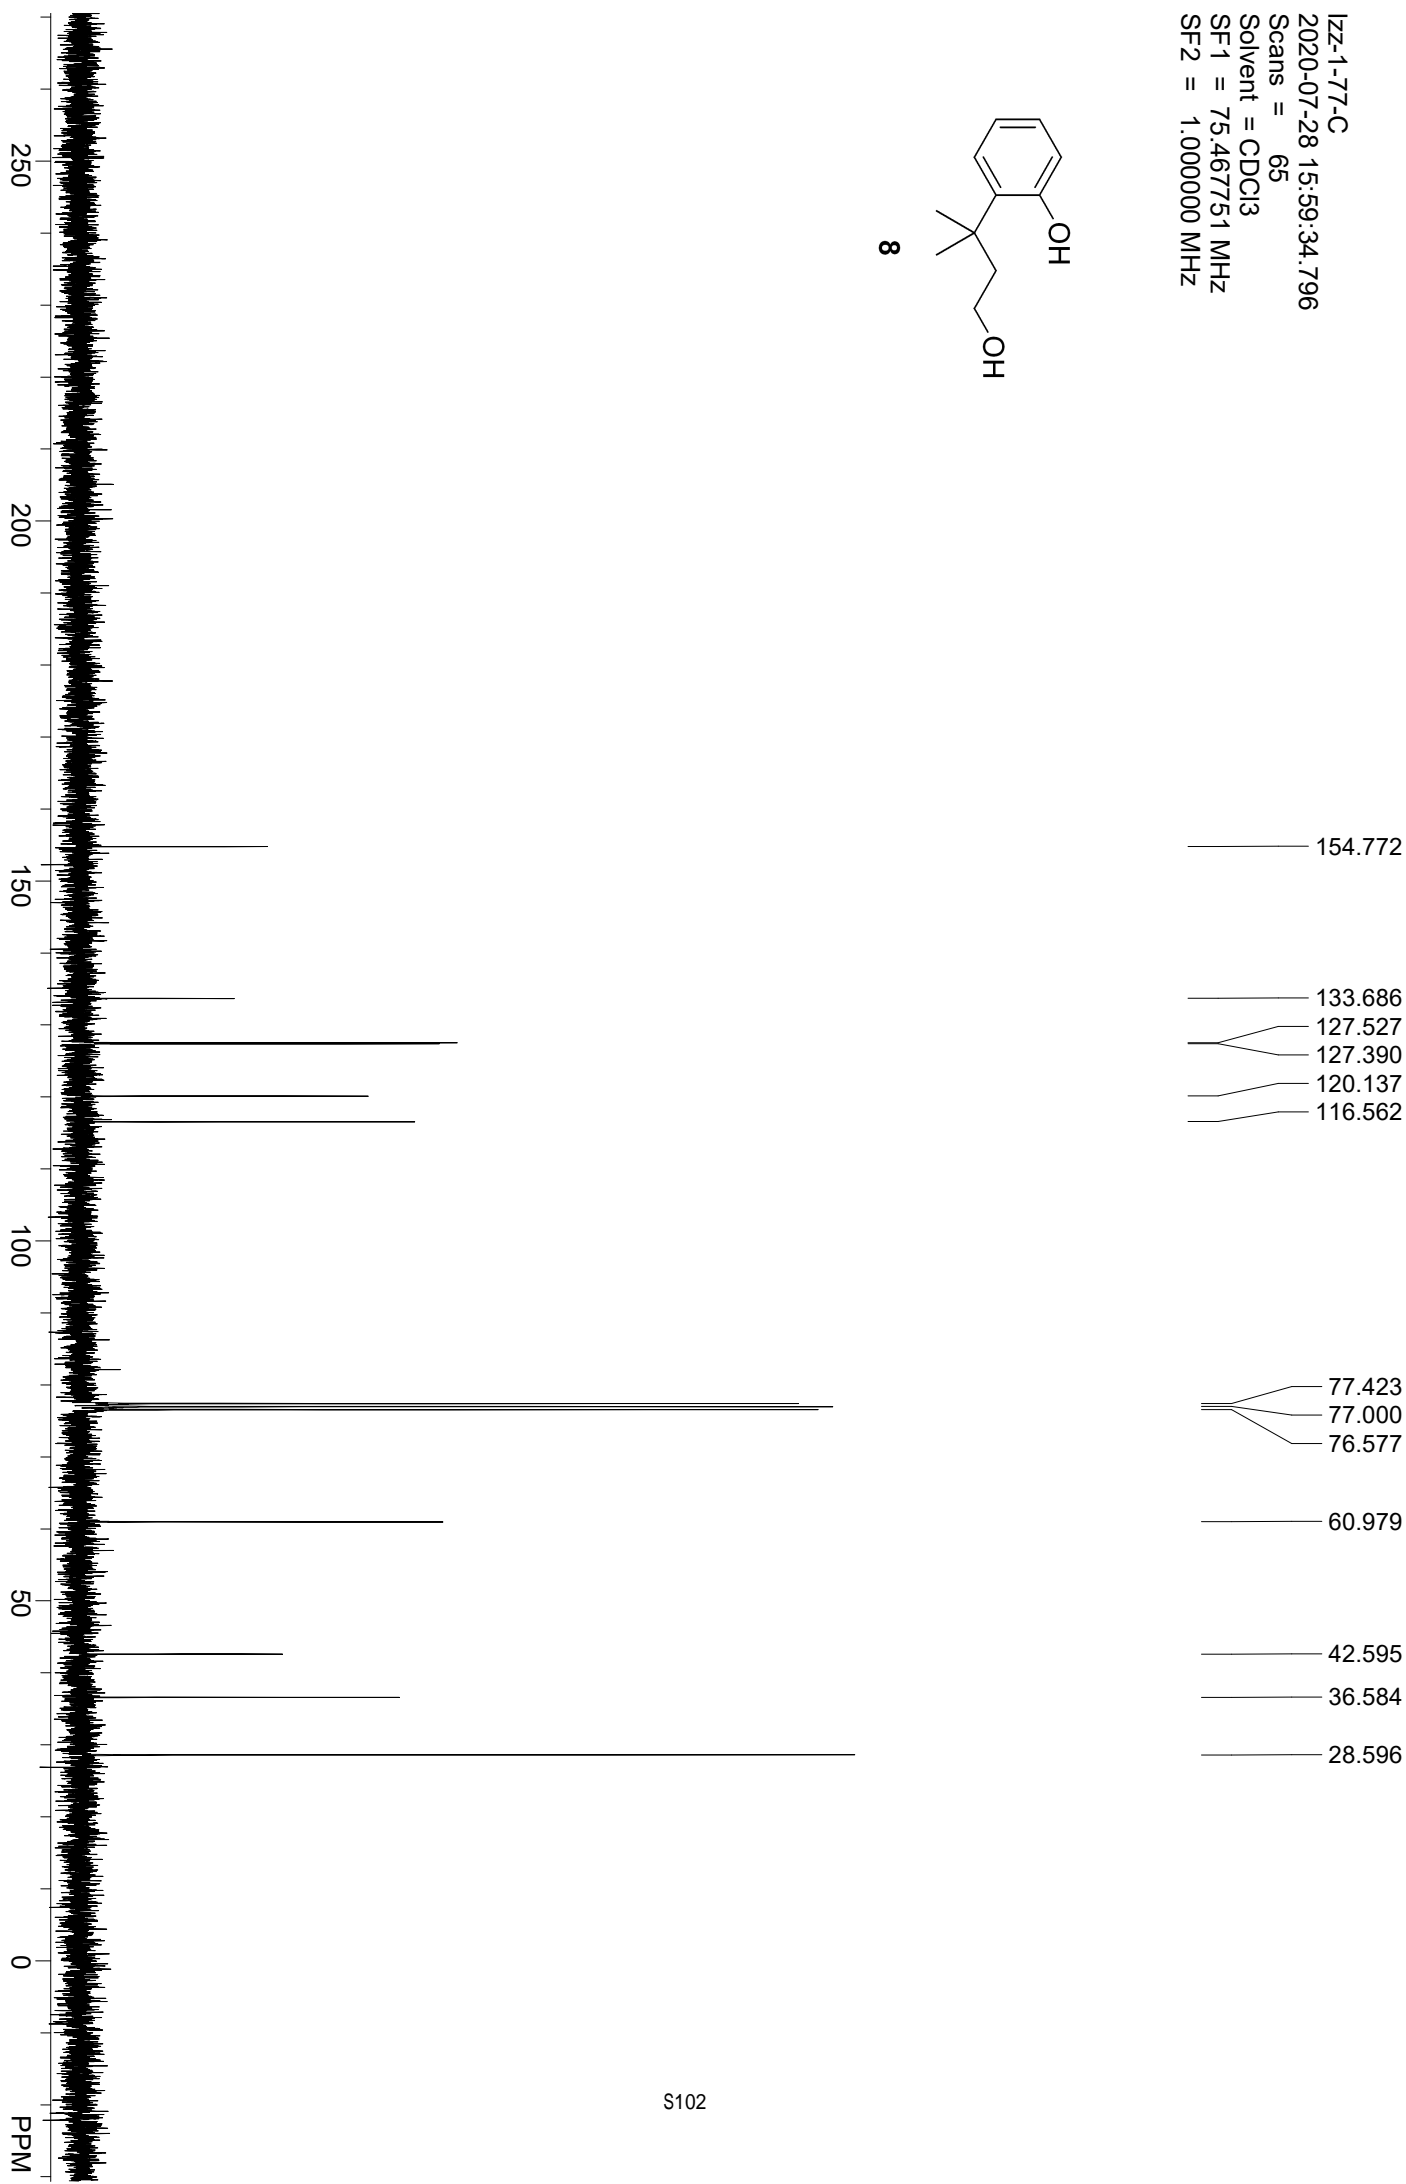

lzz-2-110-H  
Jun 21 2022  
Scans = 8  
Solvent = CDCl3  
SF1 = 399.717865 MHz  
SF2 = 100.517960 MHz

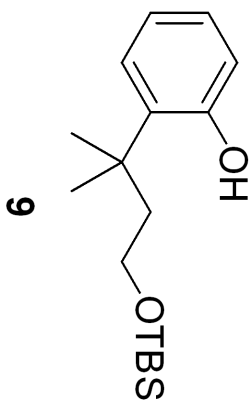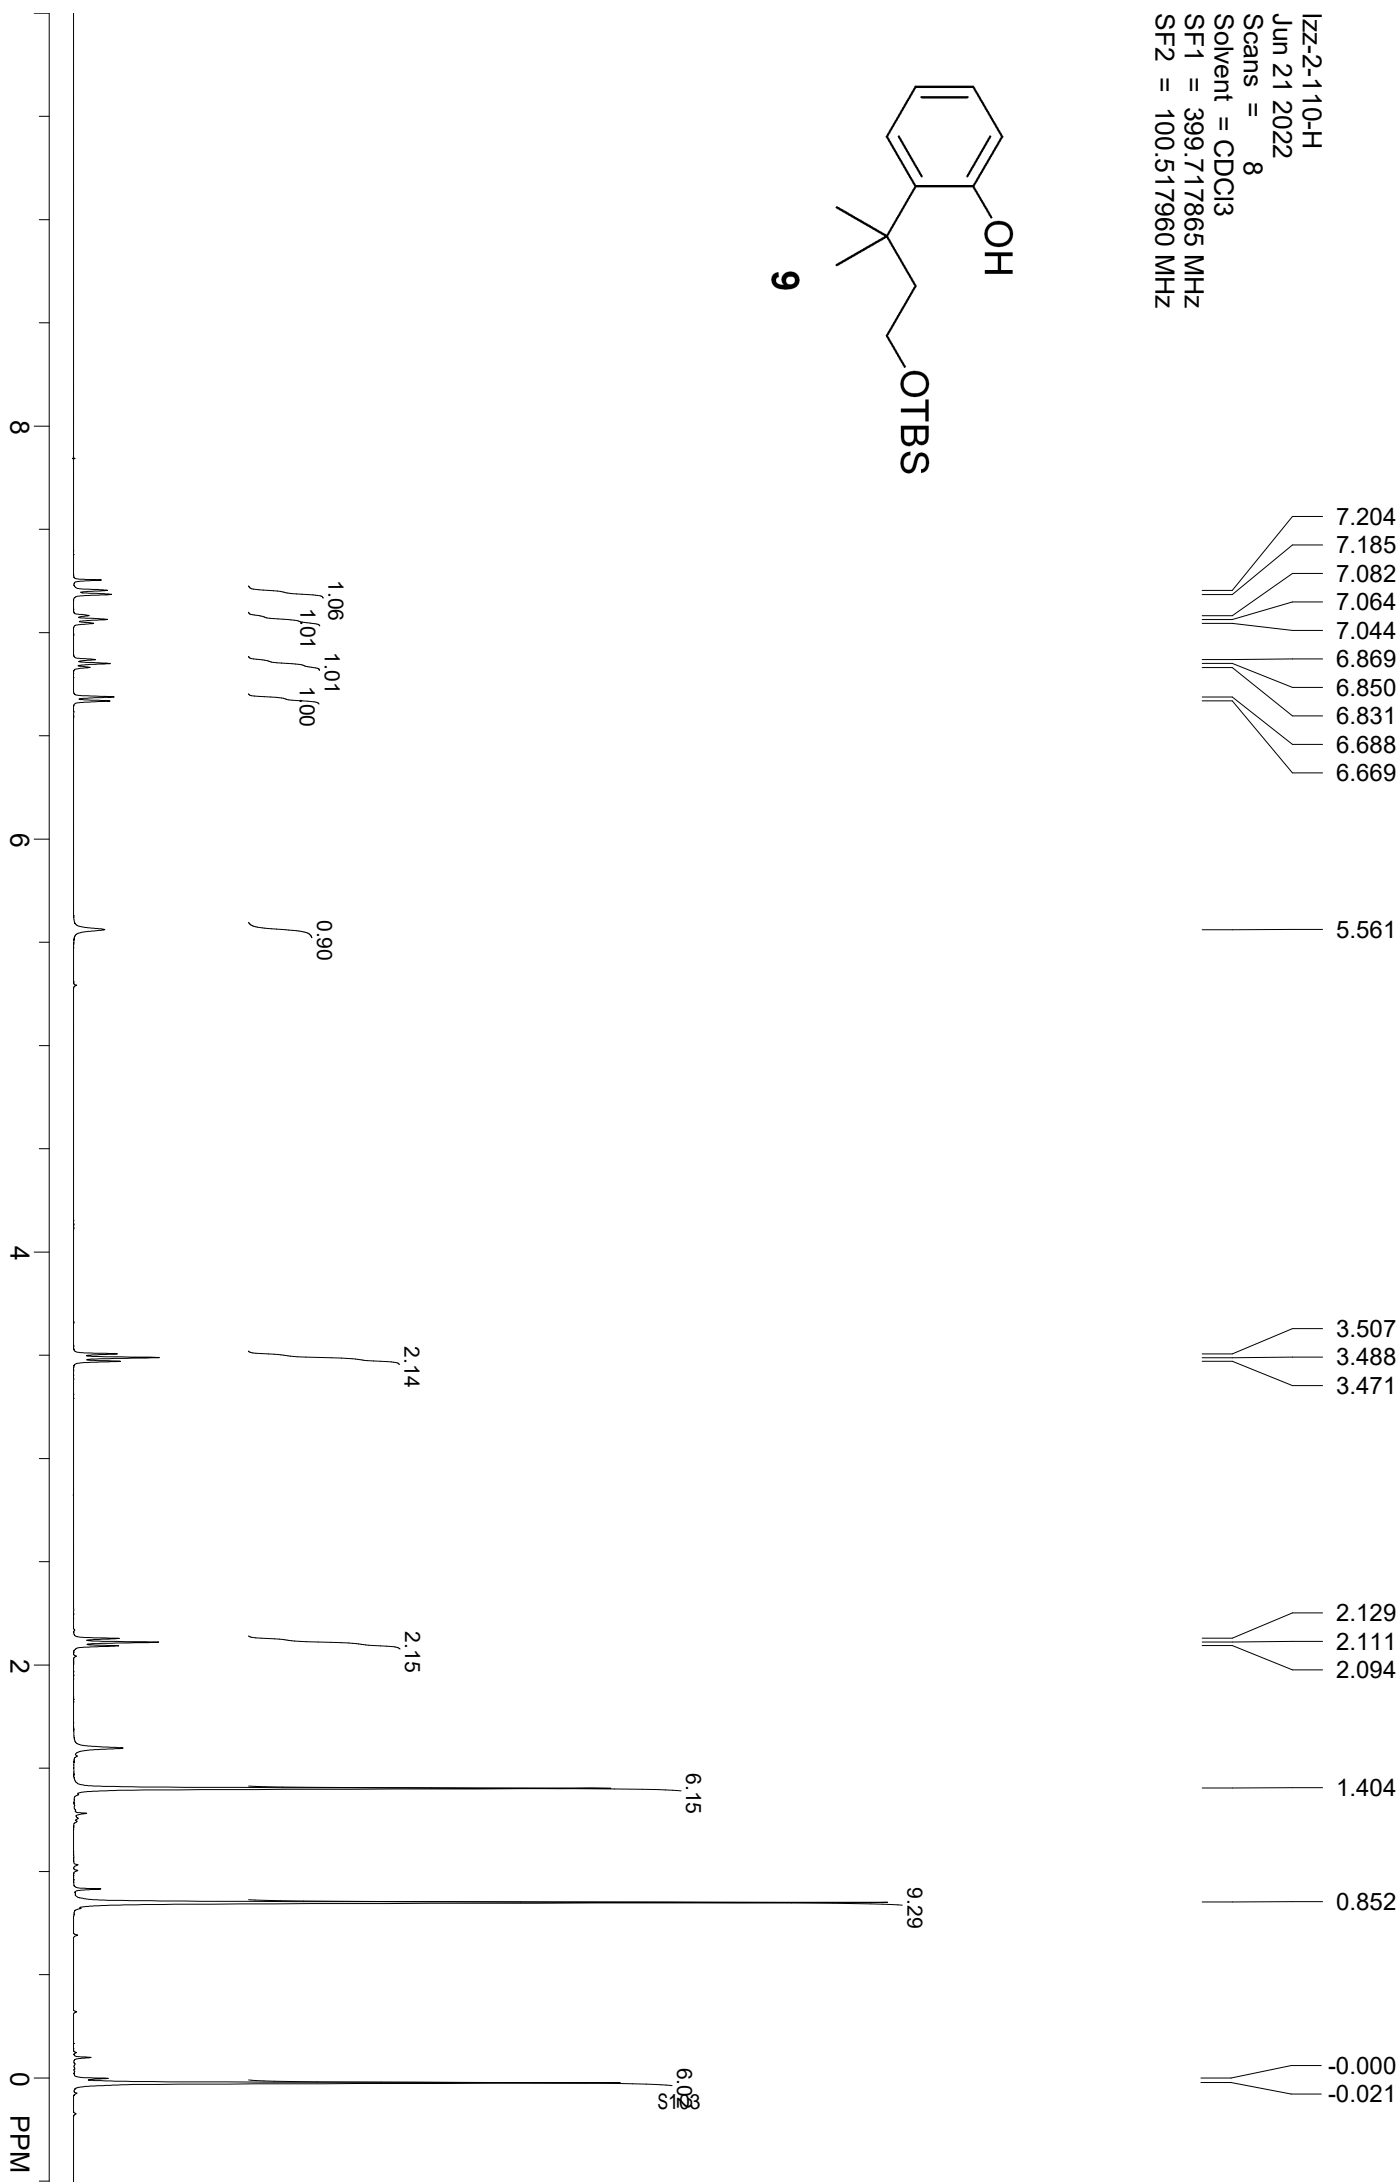

lzz-2-110-C  
CDCI3  
Tue Jun 21 21:58:43 2022  
Scans = 240  
SF1 = 100.617798 MHz  
SF2 = 1.000000 MHz

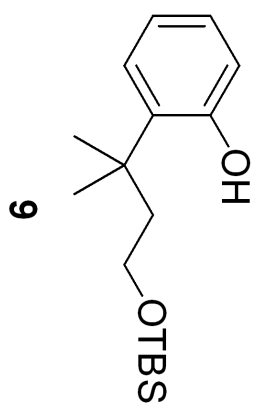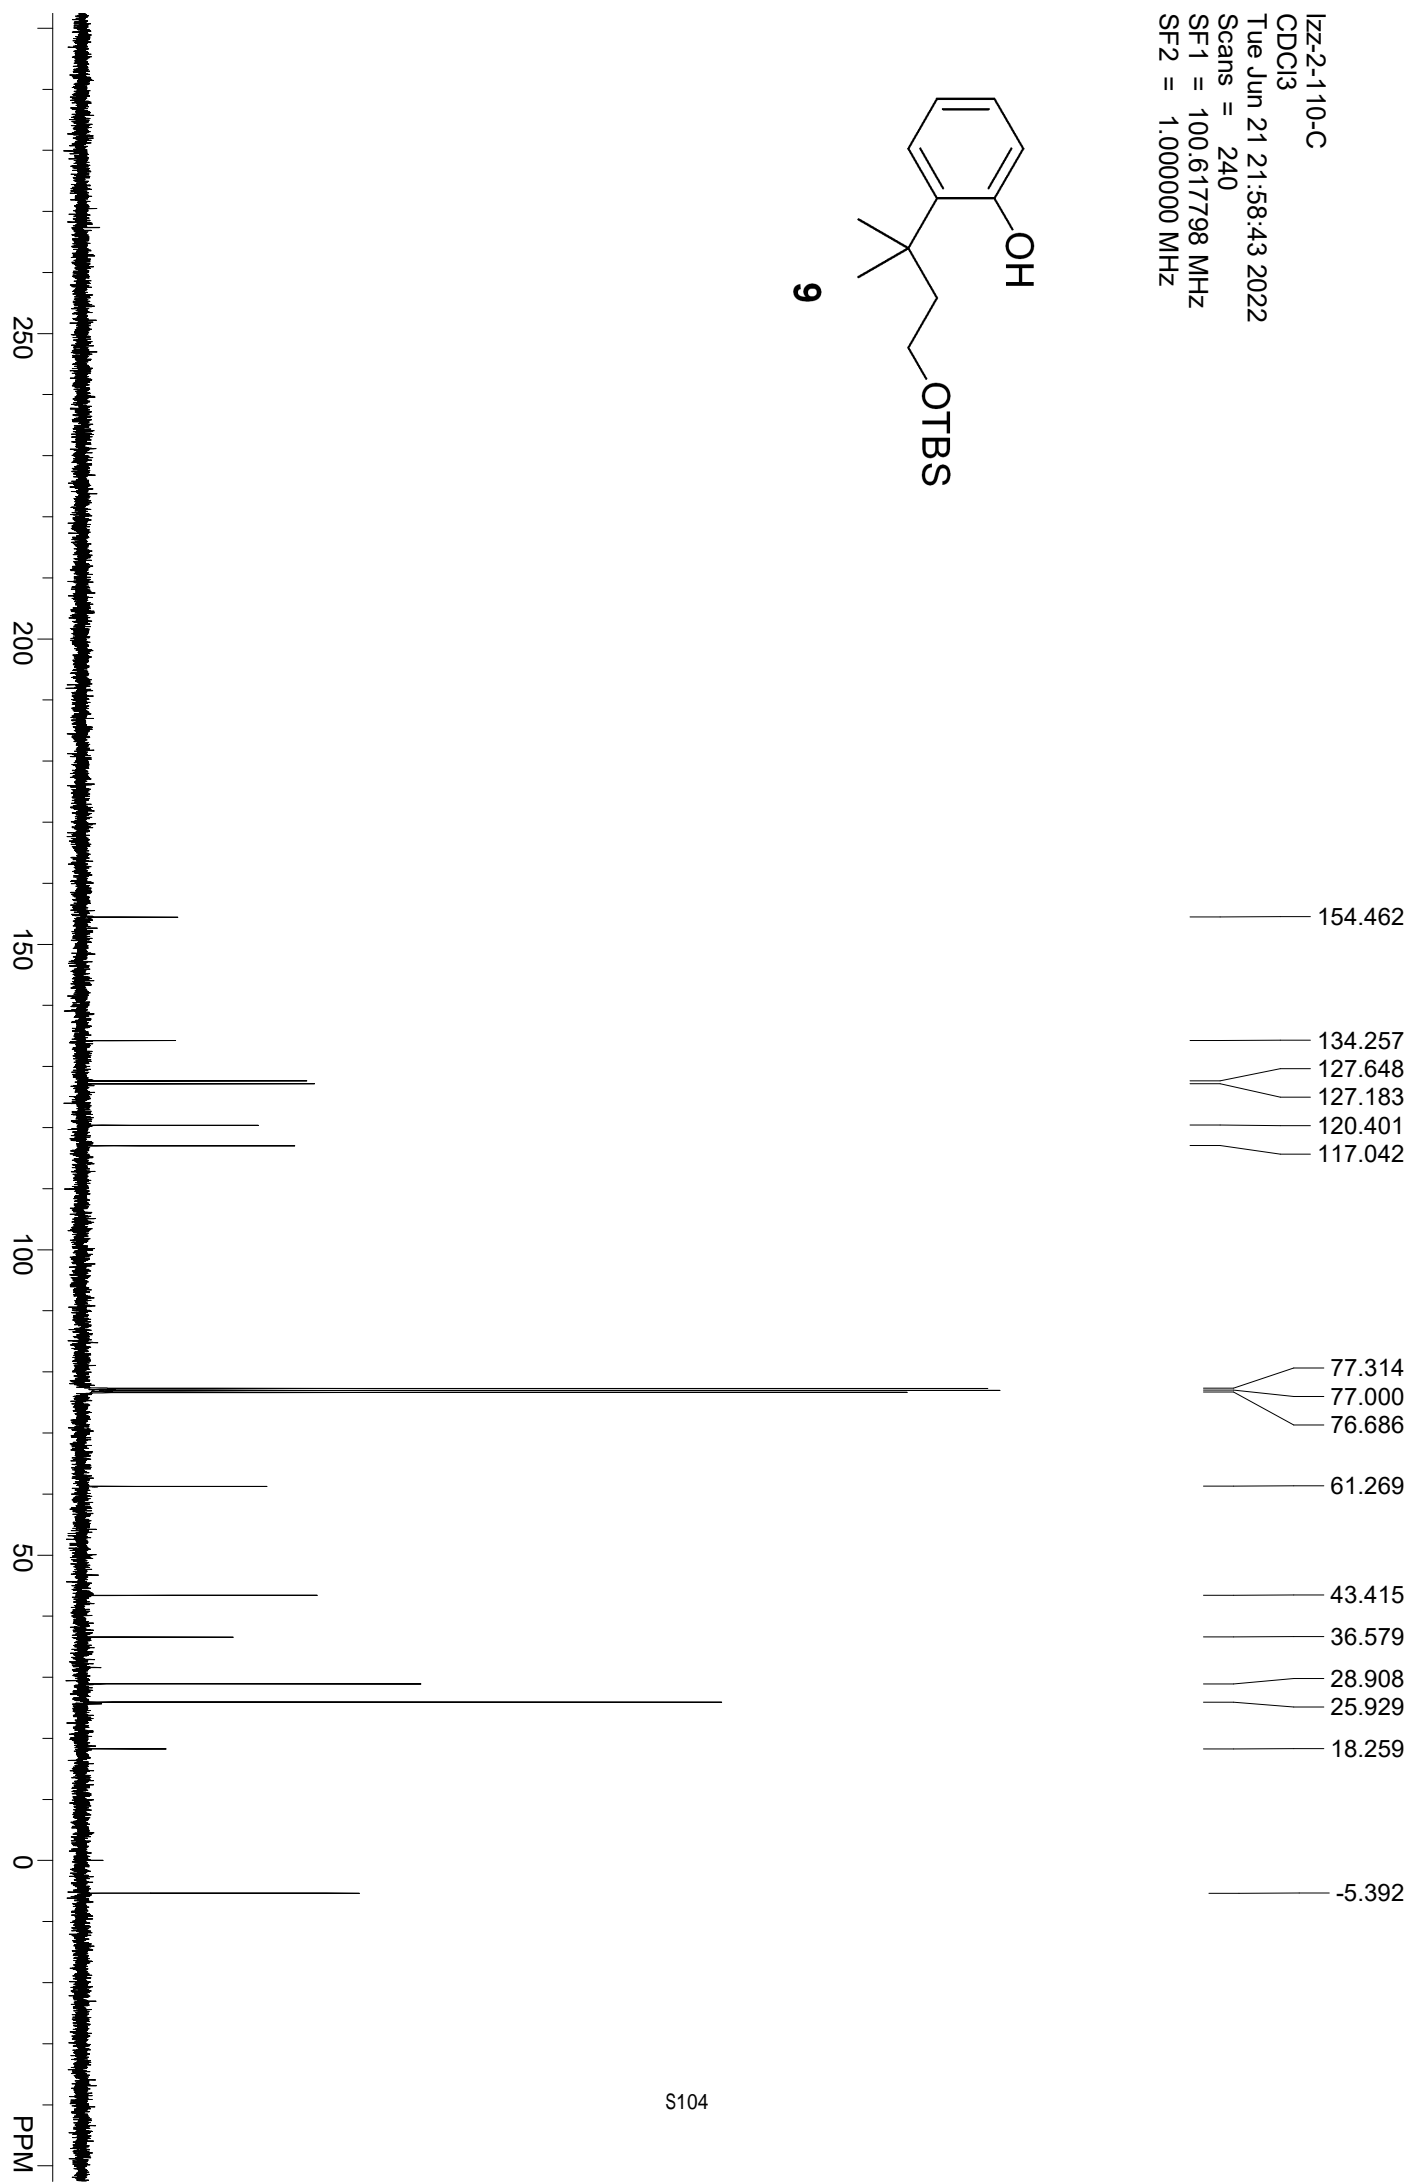



Izz-2-117-H  
Jun 22 2022  
Scans = 4  
Solvent = CDCl3  
SF1 = 399.717865 MHz  
SF2 = 100.517960 MHz

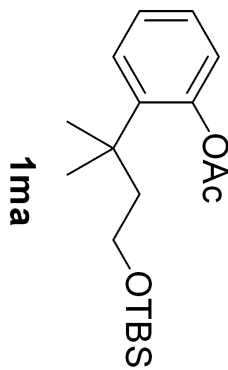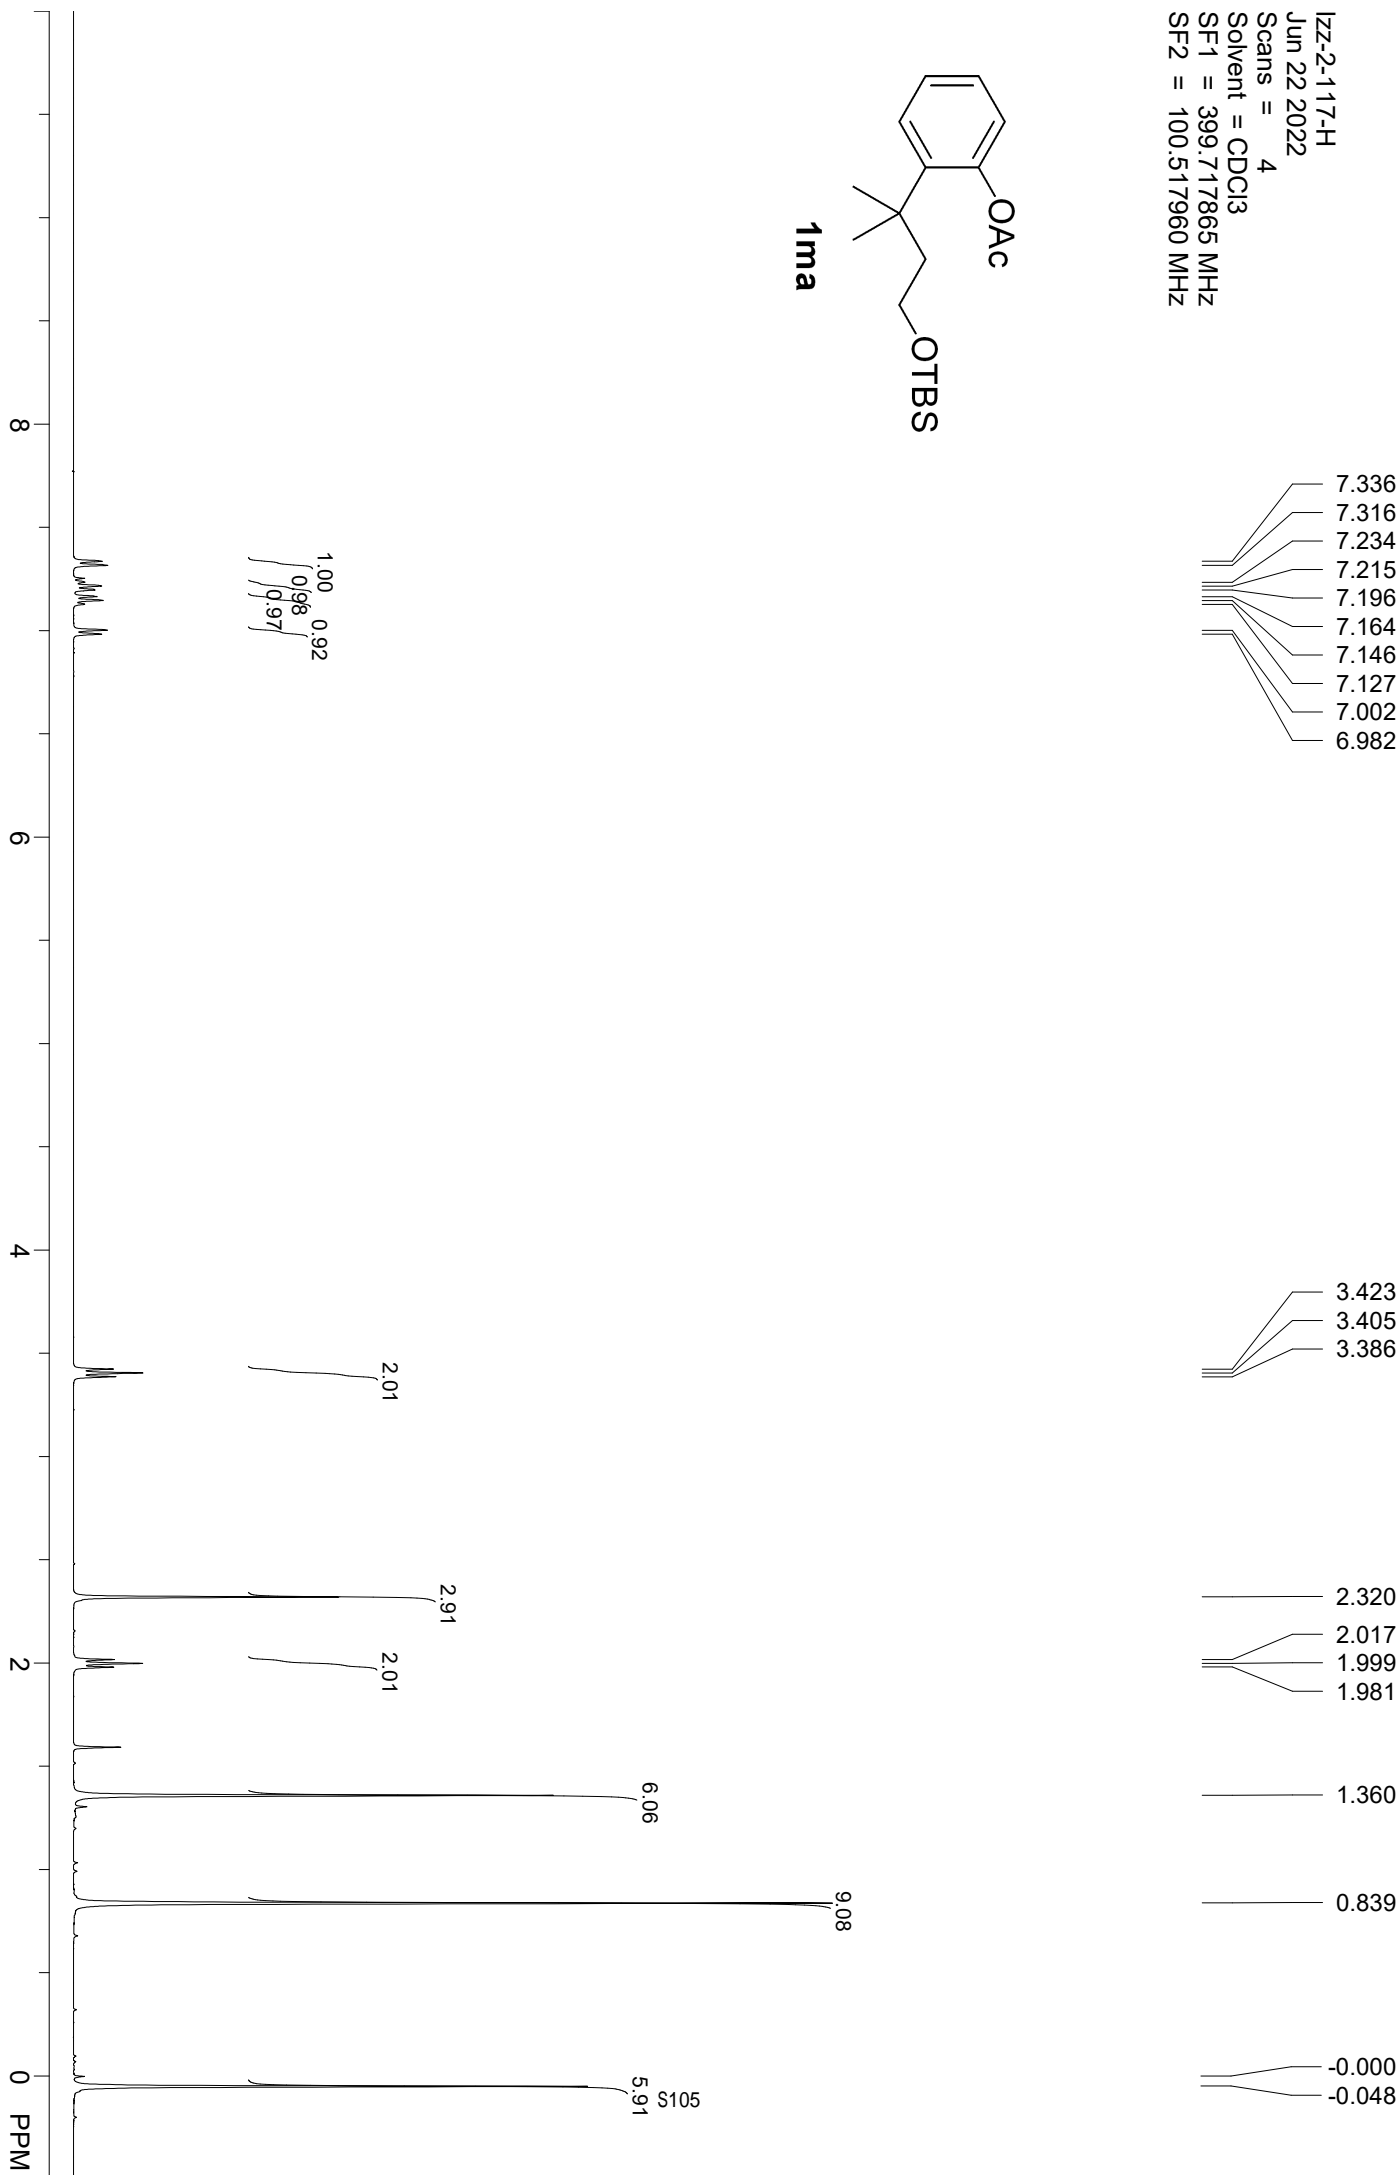

Izz-2-117-C  
Jun 26 2022  
Scans = 244  
Solvent = cdcl3  
SF1 = 100.519485 MHz  
SF2 = 399.717072 MHz

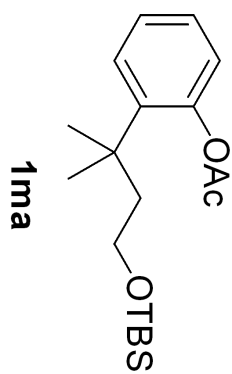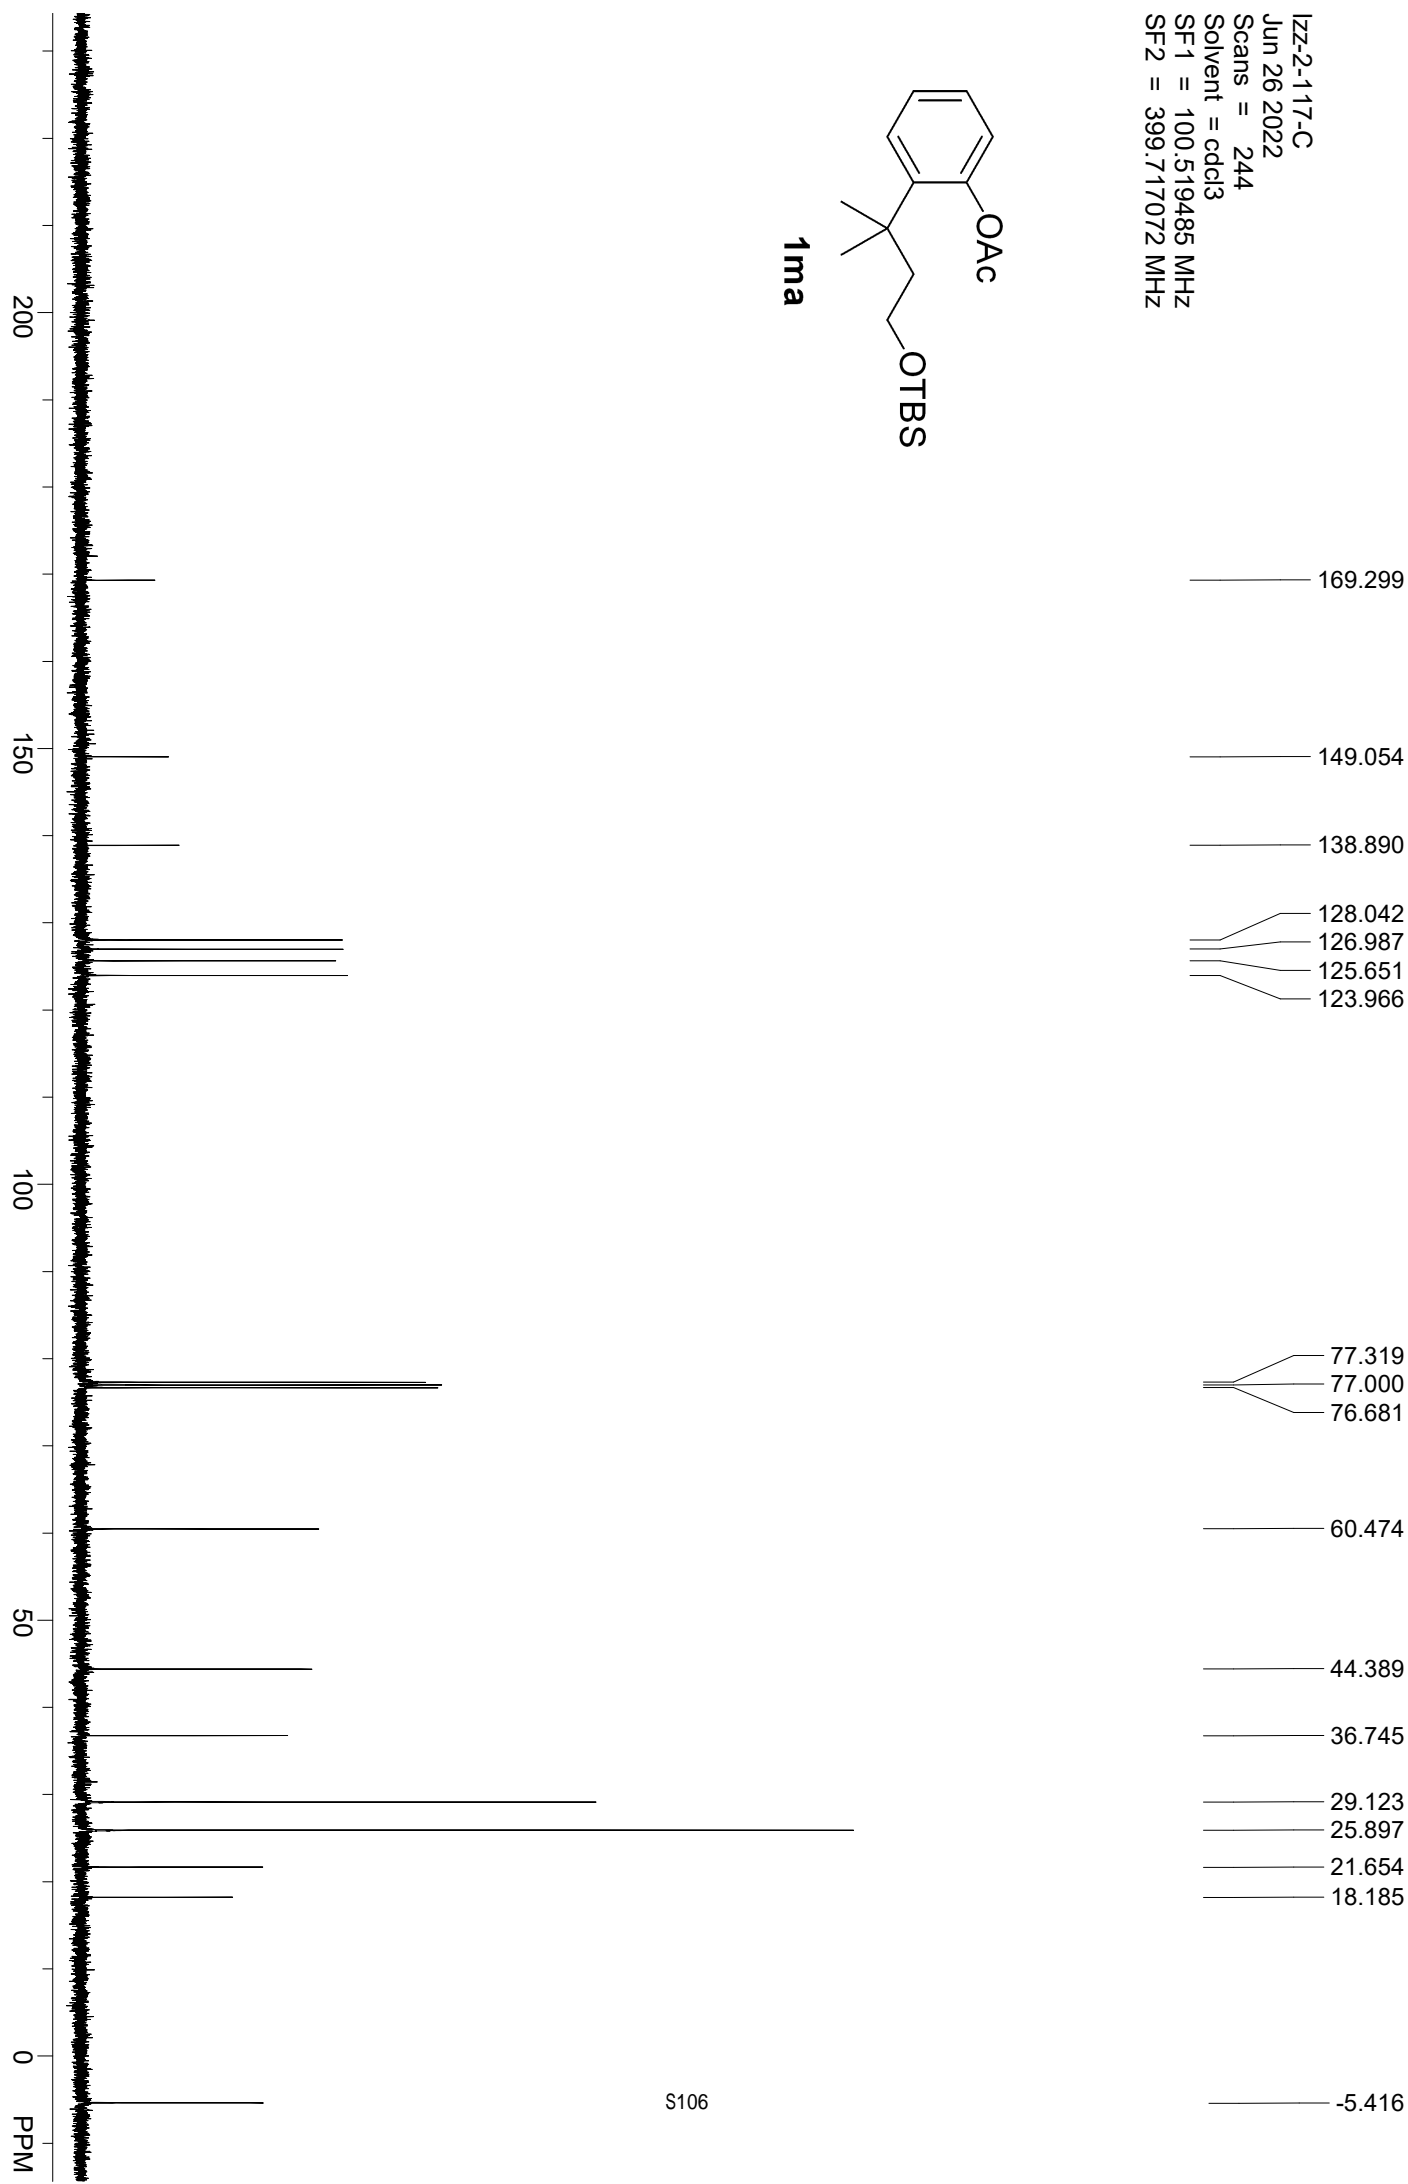

lzz-2-119  
CDCI3  
Tue Jul 05 06:30:32 2022  
Scans = 16  
SF1 = 400.102600 MHz  
SF2 = 1.000000 MHz

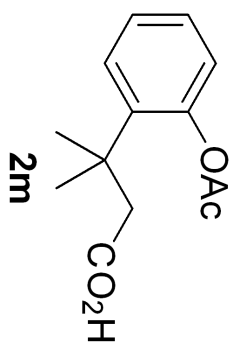

7.393  
7.373  
7.259  
7.251  
7.191  
7.172  
7.153  
7.042  
7.022

2.789

2.349

1.468

-0.000

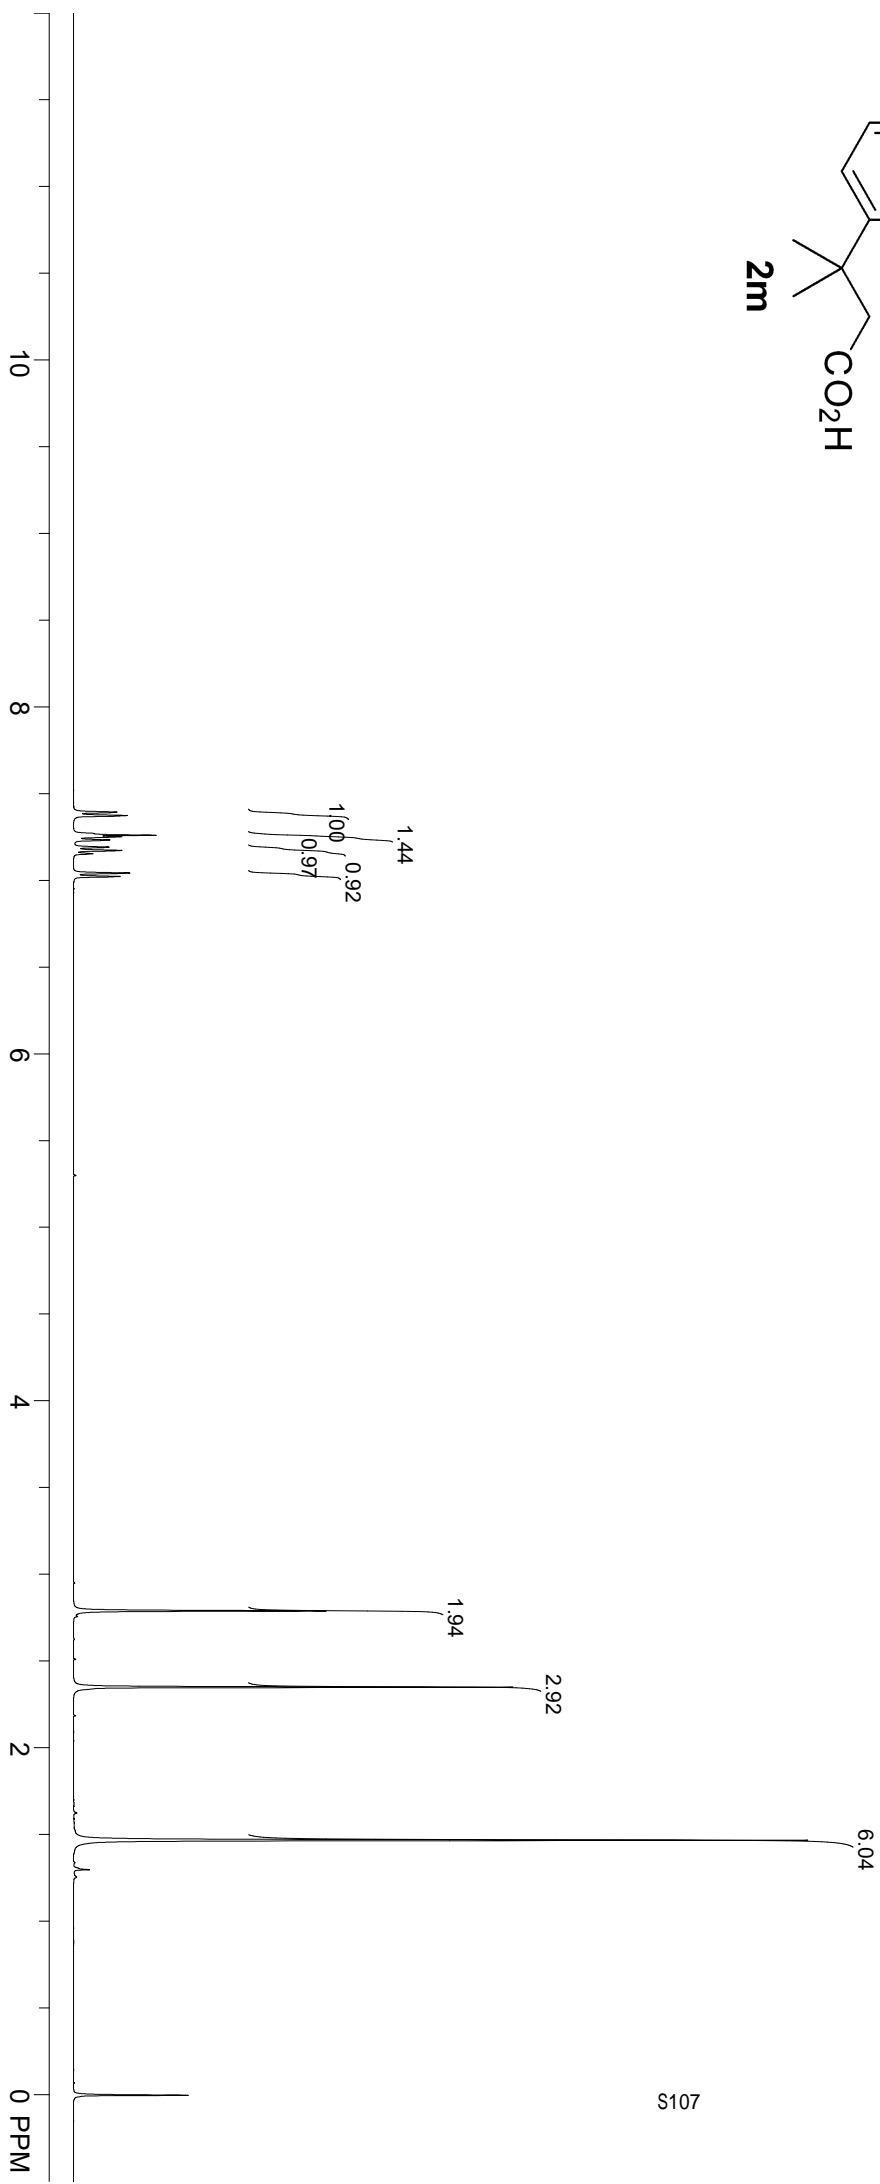

Izz-2-119-C  
Jul 10 2022  
Scans = 800  
Solvent = cdcl3  
SF1 = 100.519485 MHz  
SF2 = 399.717072 MHz

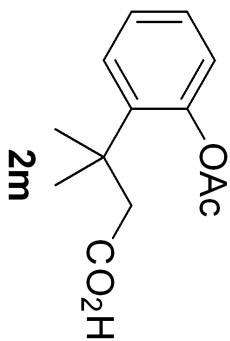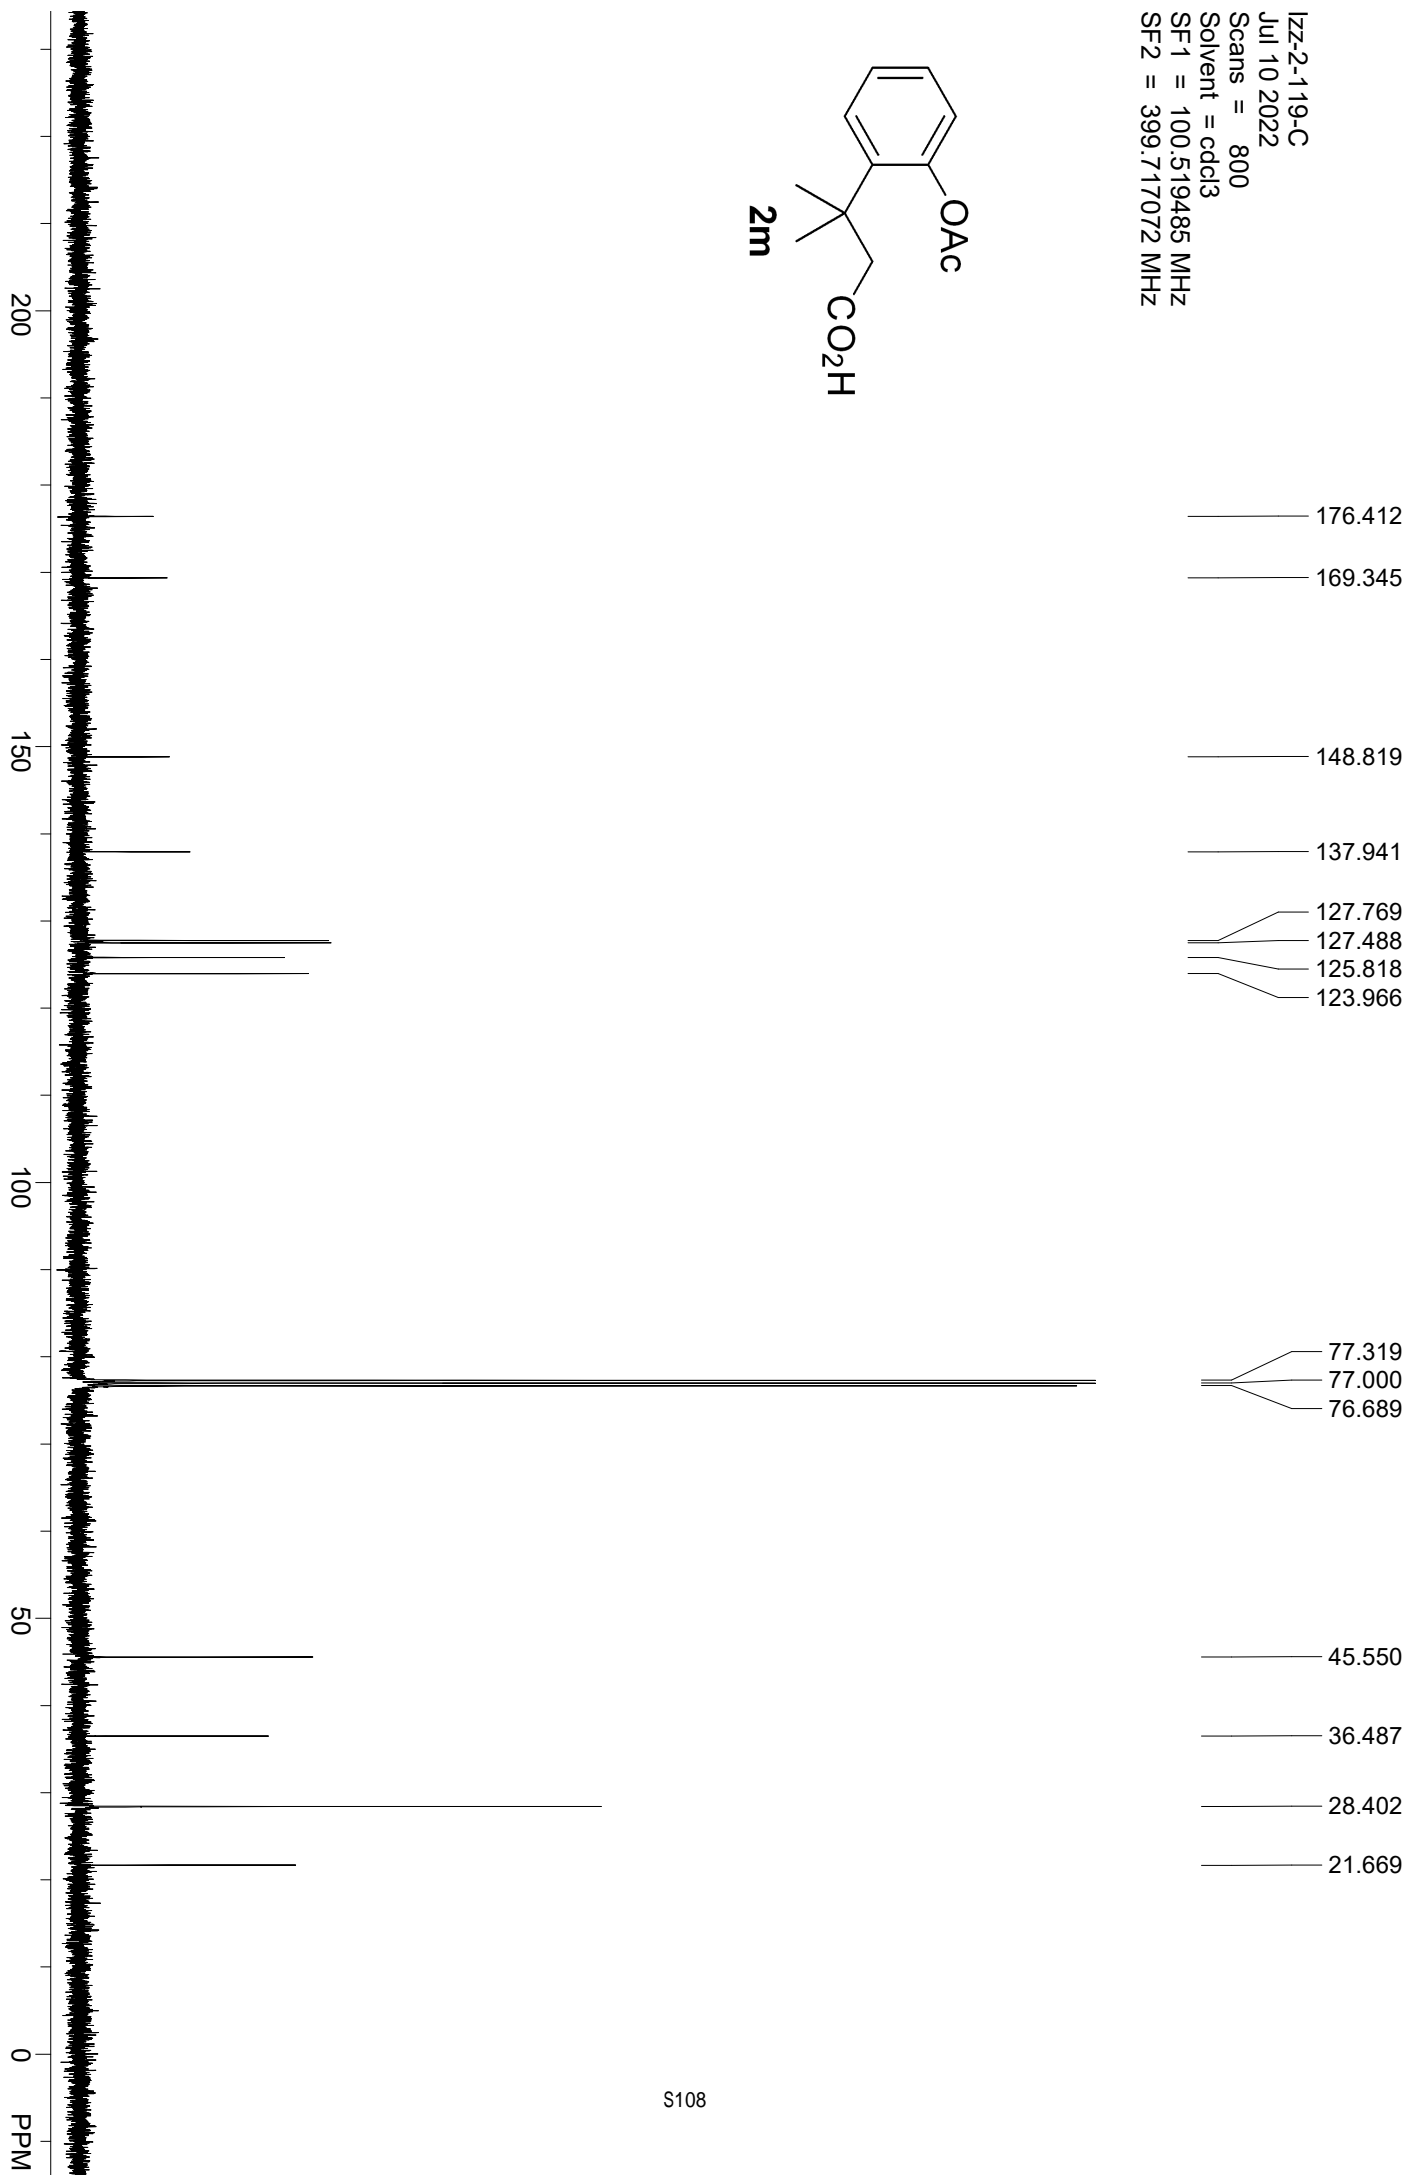

lzz-2-125-H  
CDC13  
Tue Jul 05 01:38:20 2022  
Scans = 16  
SF1 = 400.102600 MHz  
SF2 = 1.000000 MHz

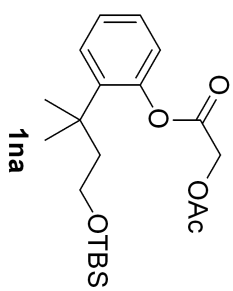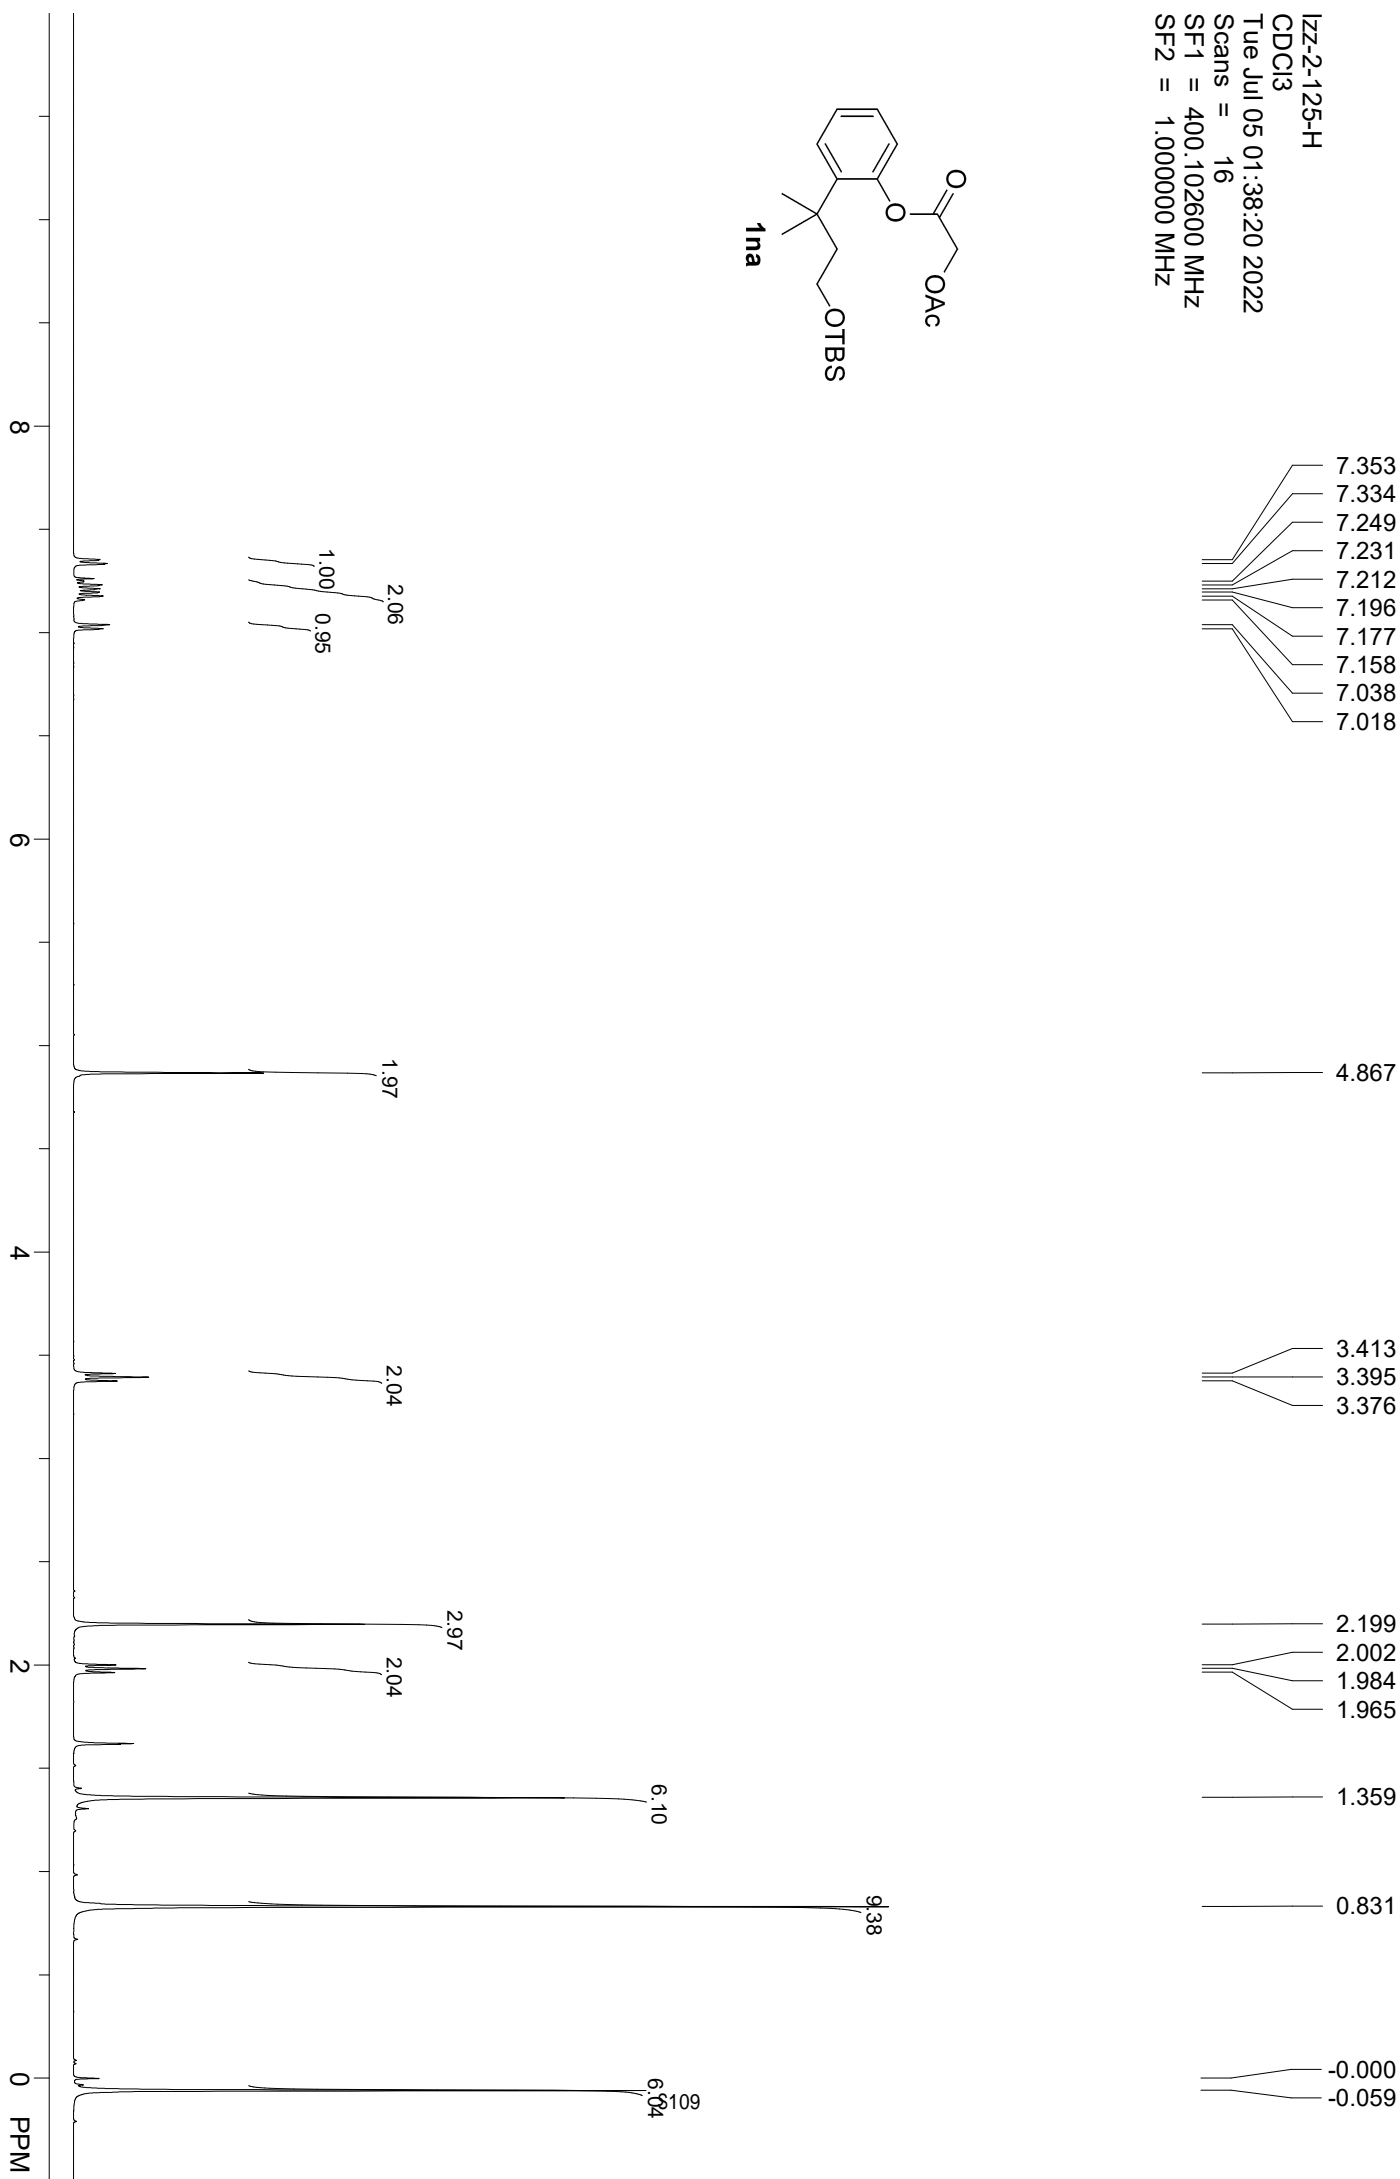

Izz-2-125-C  
CDCI3  
Tue Jul 05 01:54:32 2022  
Scans = 240  
SF1 = 100.617798 MHz  
SF2 = 1.000000 MHz

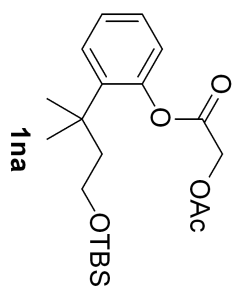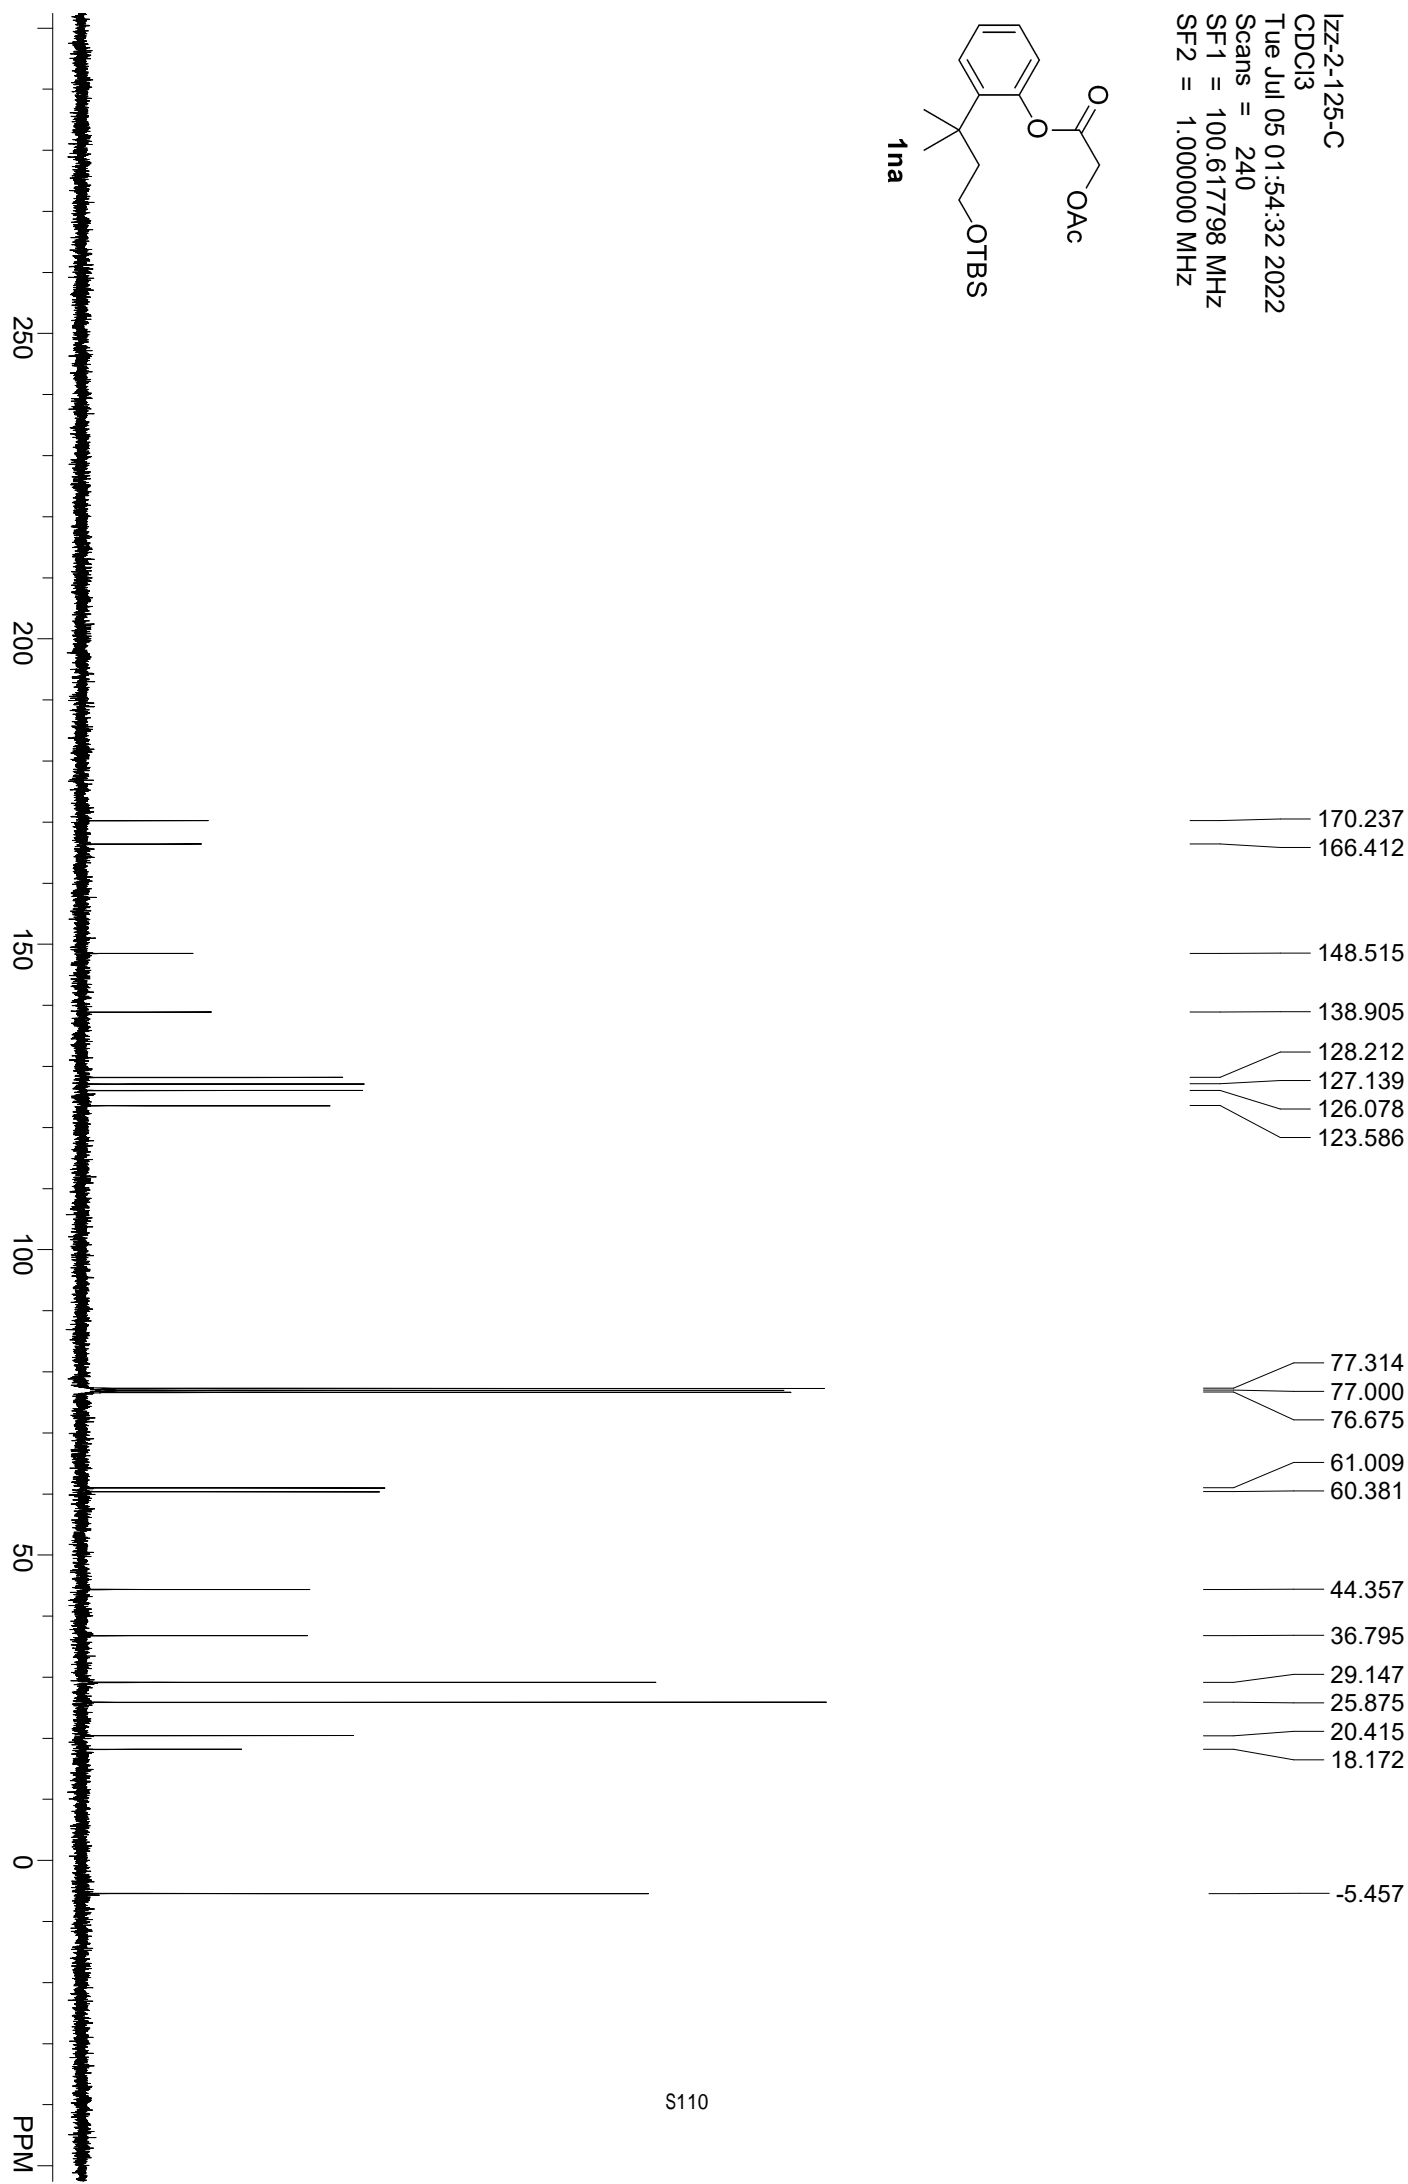

Izz-2-128-H  
Jul 9 2022  
Scans = 4  
Solvent = CDCl3  
SF1 = 399.718048 MHz  
SF2 = 100.517960 MHz

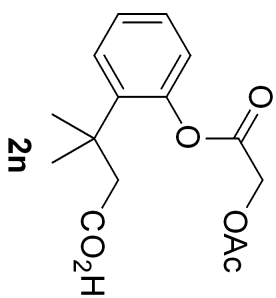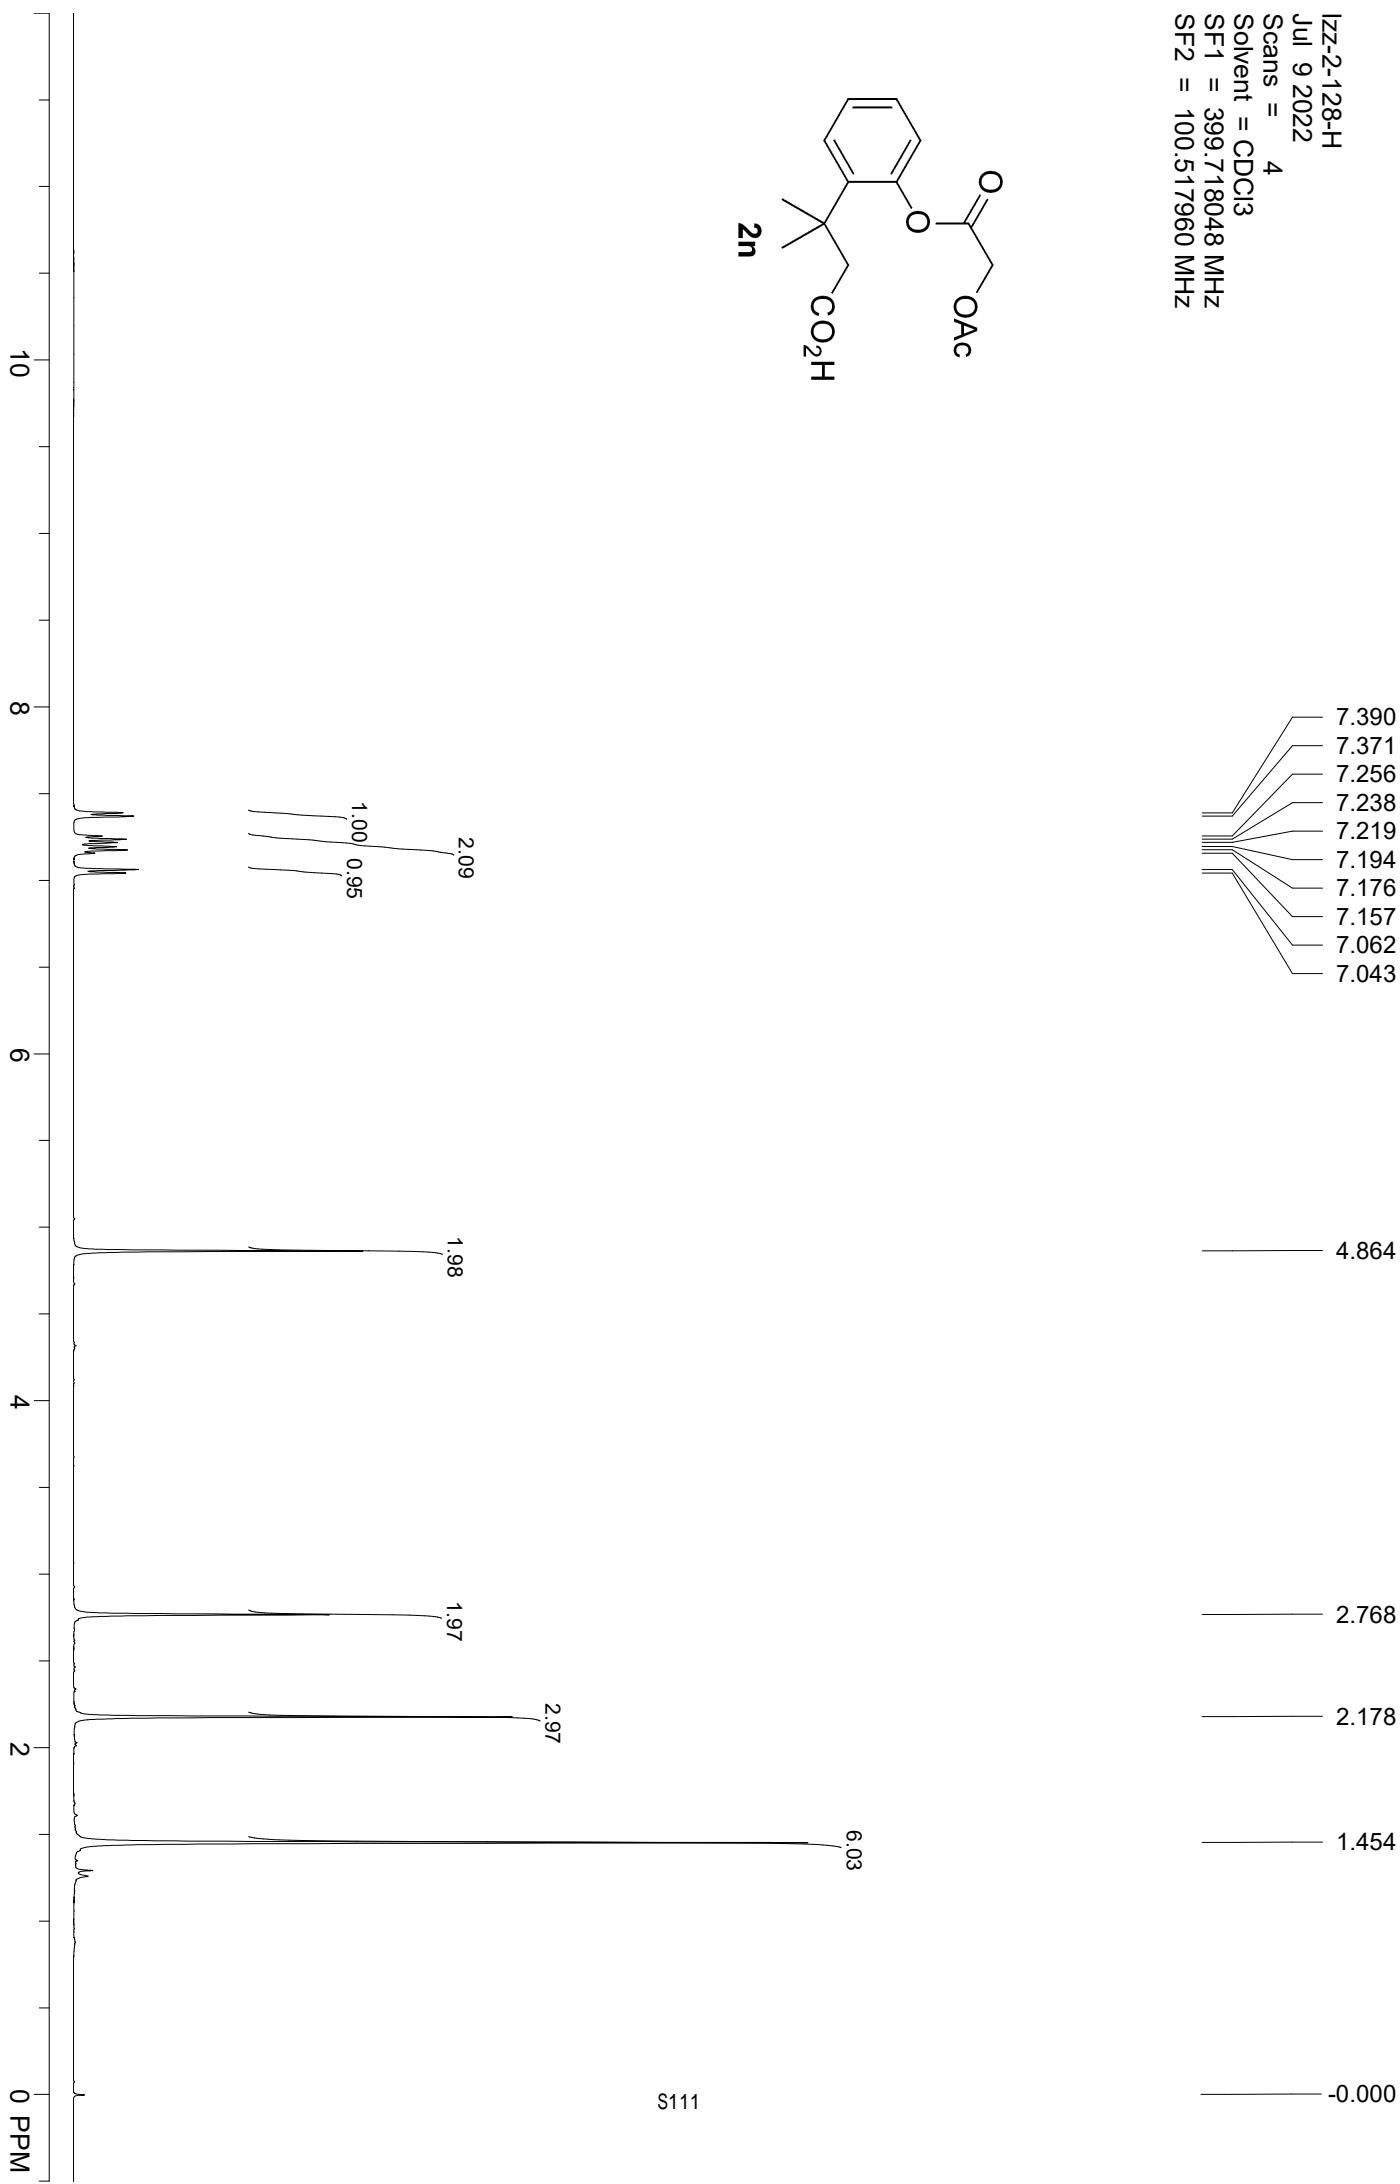

Izz-2-128-C  
Jul 10 2022  
Scans = 56  
Solvent = cdcl3  
SF1 = 100.519485 MHz  
SF2 = 399.717072 MHz

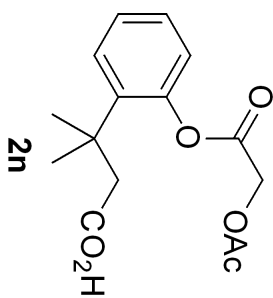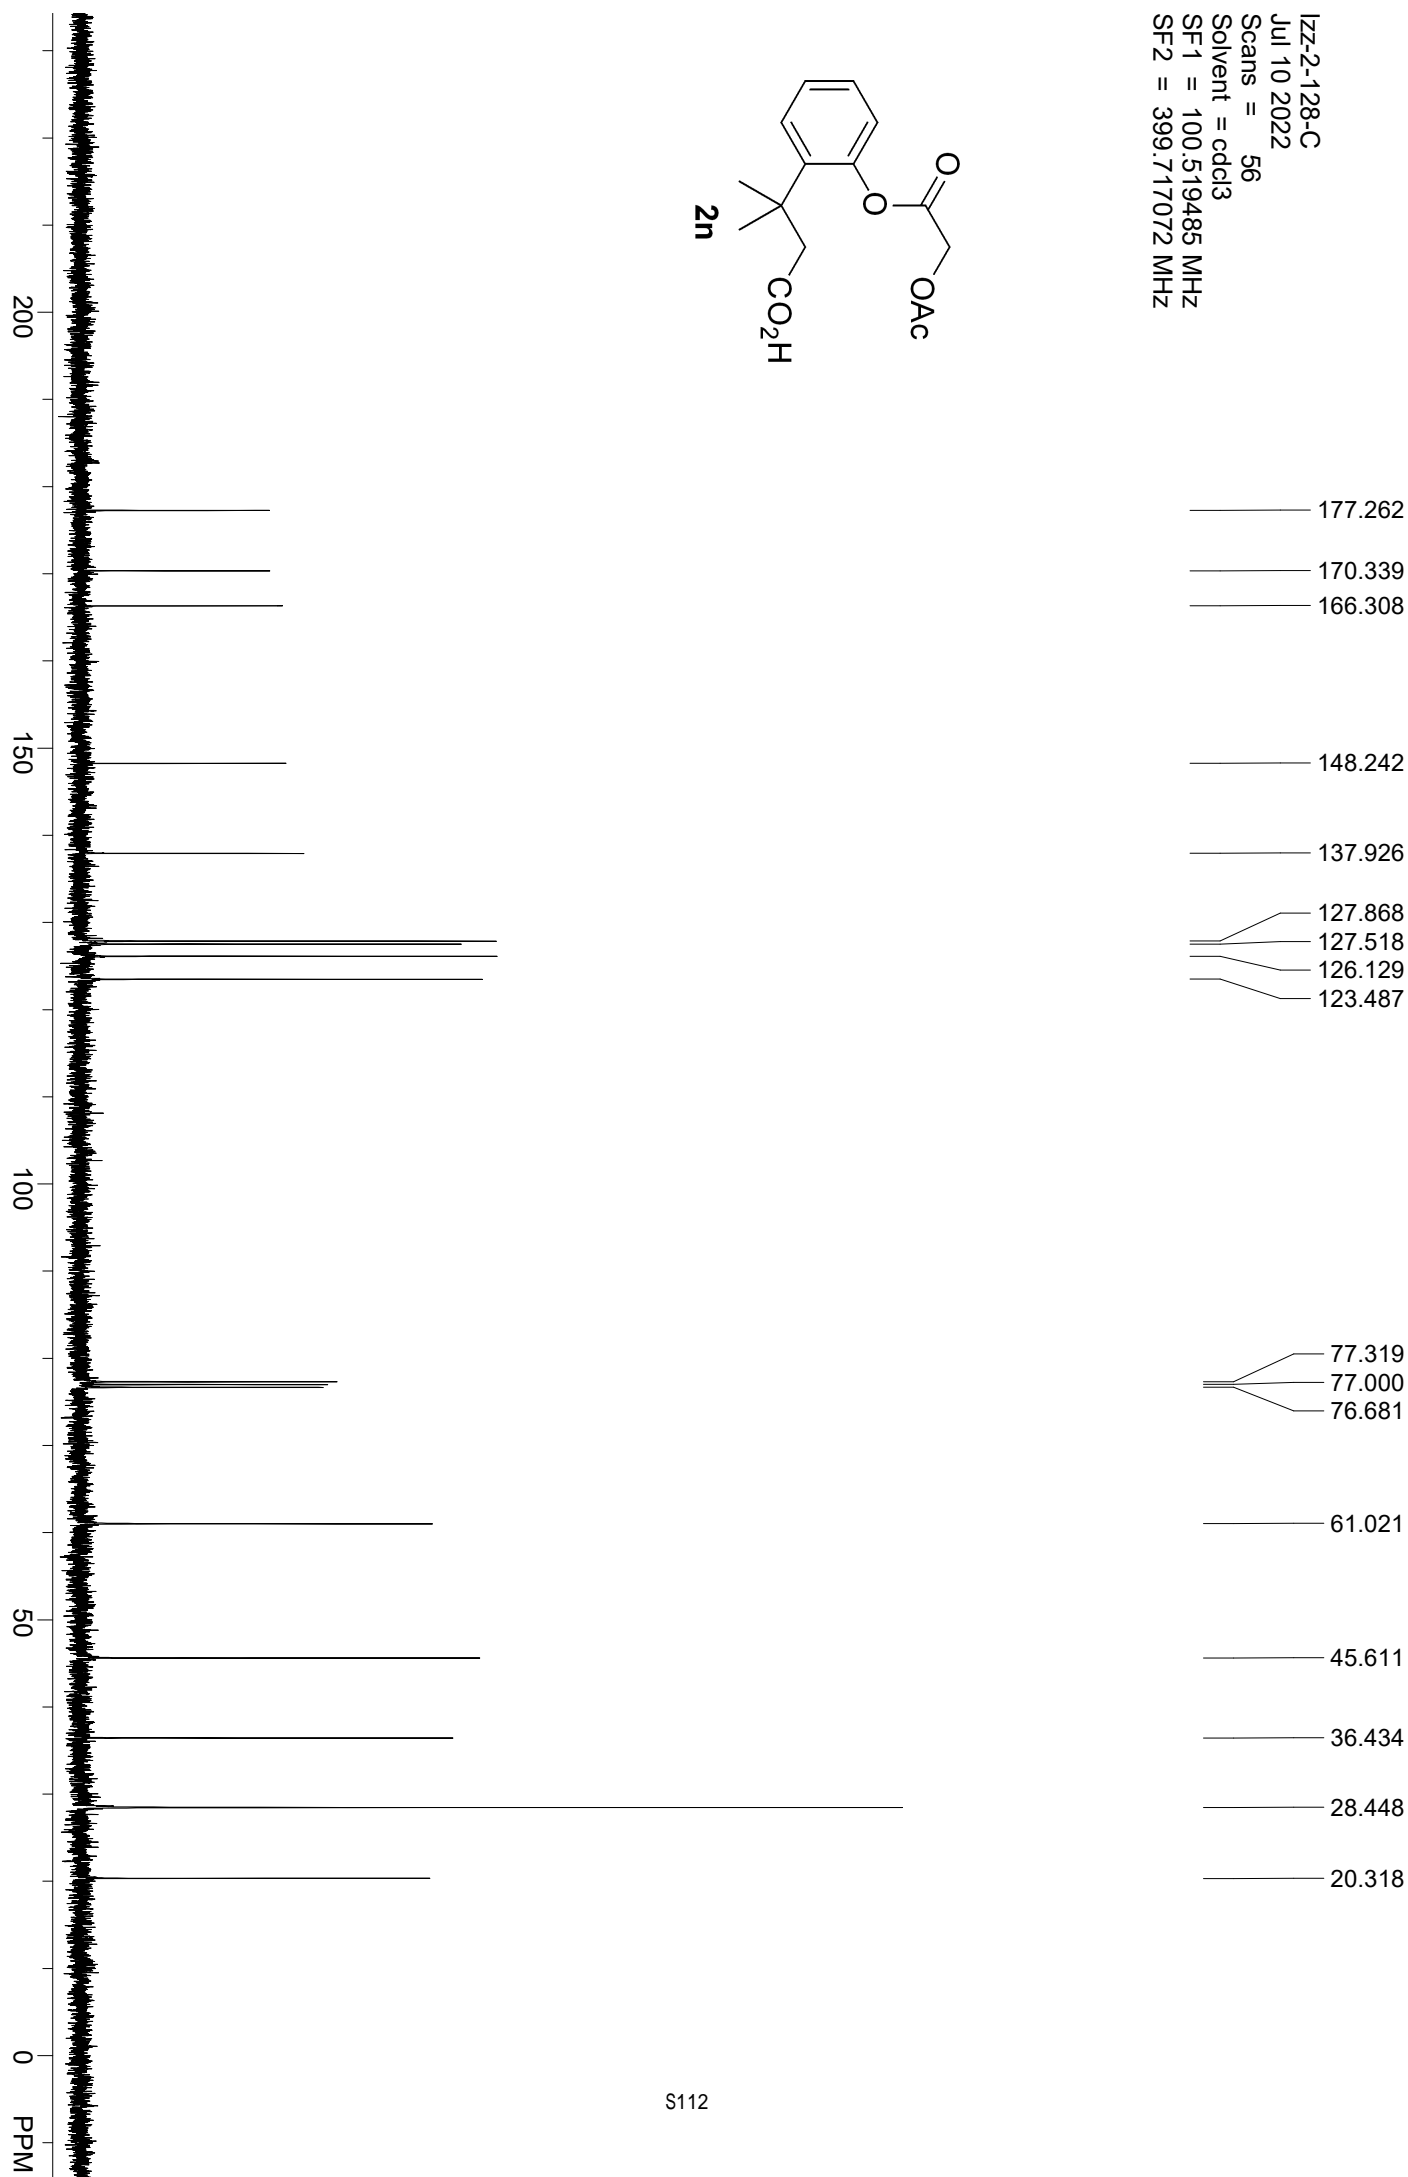

Supplement: d4cc01234h1.pdf [file d4cc01234h1.pdf]
